# Supplementary material for: Chemical diversity of cyanobacterial natural products
Source: Royal Society of Chemistry journal article supplement (doi:10.1039/d4np00040d), 2024-11-14
Supplement: d4np00040d1.pdf [file d4np00040d1.pdf]

## Supplementary Information

### Chemical diversity of cyanobacterial natural products

Márcio B. Weiss, Ricardo Borges, Peter Sullivan, João P. B. Domingues, Francisco S. da Silva,  
Shangwen Luo, Jimmy Orjala, Camila M. Crnkovic

|                 |                                                                                                                                                                                                                         |
|-----------------|-------------------------------------------------------------------------------------------------------------------------------------------------------------------------------------------------------------------------|
| Page S2         | <b>Introduction</b>                                                                                                                                                                                                     |
| Page S2         | <b>Abbreviations and symbols</b>                                                                                                                                                                                        |
| Page S3         | <b>Figure S1.</b> Number of articles reporting new cyanobacterial natural products per year and environmental source (2010-2023).                                                                                       |
| Page S4         | <b>Figure S2.</b> Similarity network of the cyanobacterial metabolites reported between 2010 and 2023 with compound labels. Nodes are color coded according to the environmental source of the producing cyanobacteria. |
| Page S5         | <b>Figure S3.</b> Similarity network of the cyanobacterial metabolites reported between 2010 and 2023 with compound labels. Nodes are color coded according to the taxonomic order of the producing cyanobacteria.      |
| Pages S6-S91    | <b>Table S1.</b> Peptides and lipopeptides from cyanobacteria (2010-2023)                                                                                                                                               |
| Pages S92-S105  | <b>Table S2.</b> Macrolides, cyclophanes, and related compounds from cyanobacteria (2010-2023)                                                                                                                          |
| Pages S106-S123 | <b>Table S3.</b> Acyl amides, fatty acid derivatives, and related compounds from cyanobacteria (2010-2023)                                                                                                              |
| Pages S124-S128 | <b>Table S4.</b> Alkaloids from cyanobacteria (2010-2023)                                                                                                                                                               |
| Pages S129-S134 | <b>Table S5.</b> Miscellaneous from cyanobacteria (2010-2023)                                                                                                                                                           |

## Introduction

This review covers cyanobacterial metabolites reported between 2010 and 2023. Selected compounds are described in the main text. A comprehensive list of metabolites is provided in this Supplementary Information (SI) document, along with the habitat of the producing organism, taxonomy, reference publication DOI, and chemical structures. *All* structures are shown in the SI. Sections in the SI were separated according to a chemical classification of the metabolites. Metabolites of mixed biosynthetic origin were included in sections according to their predominant chemical features or were added to the miscellaneous compounds section.

## Abbreviations and symbols

The following abbreviations and symbols are used in Tables S1-S5:

#: number of the chemical structure

\*: molecules with low similarity in the similarity network ('isolated nodes')

M: marine

F: freshwater/terrestrial

B: brackish

O: other

n.r.: non-repor

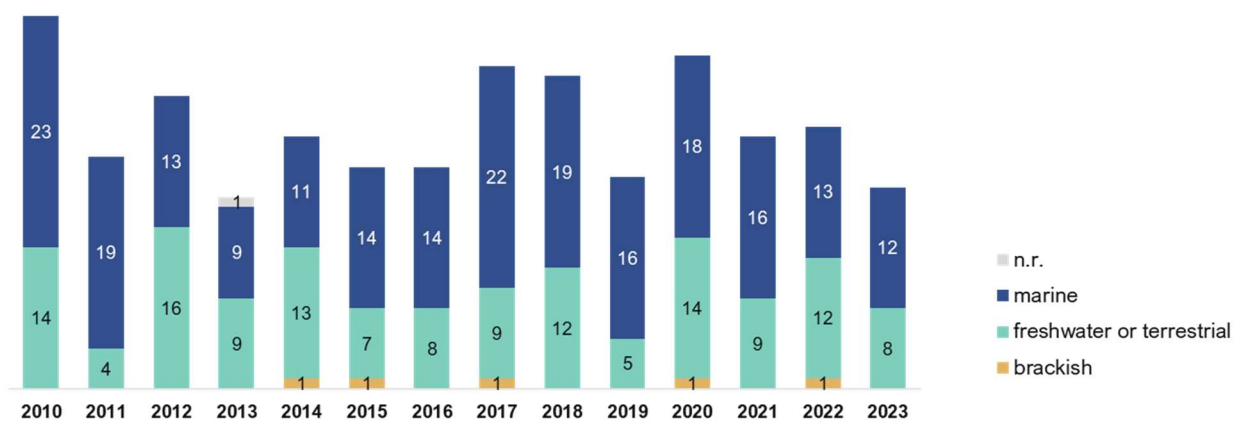

**Figure S1.** Number of articles reporting new cyanobacterial natural products per year and environmental source (2010-2023).

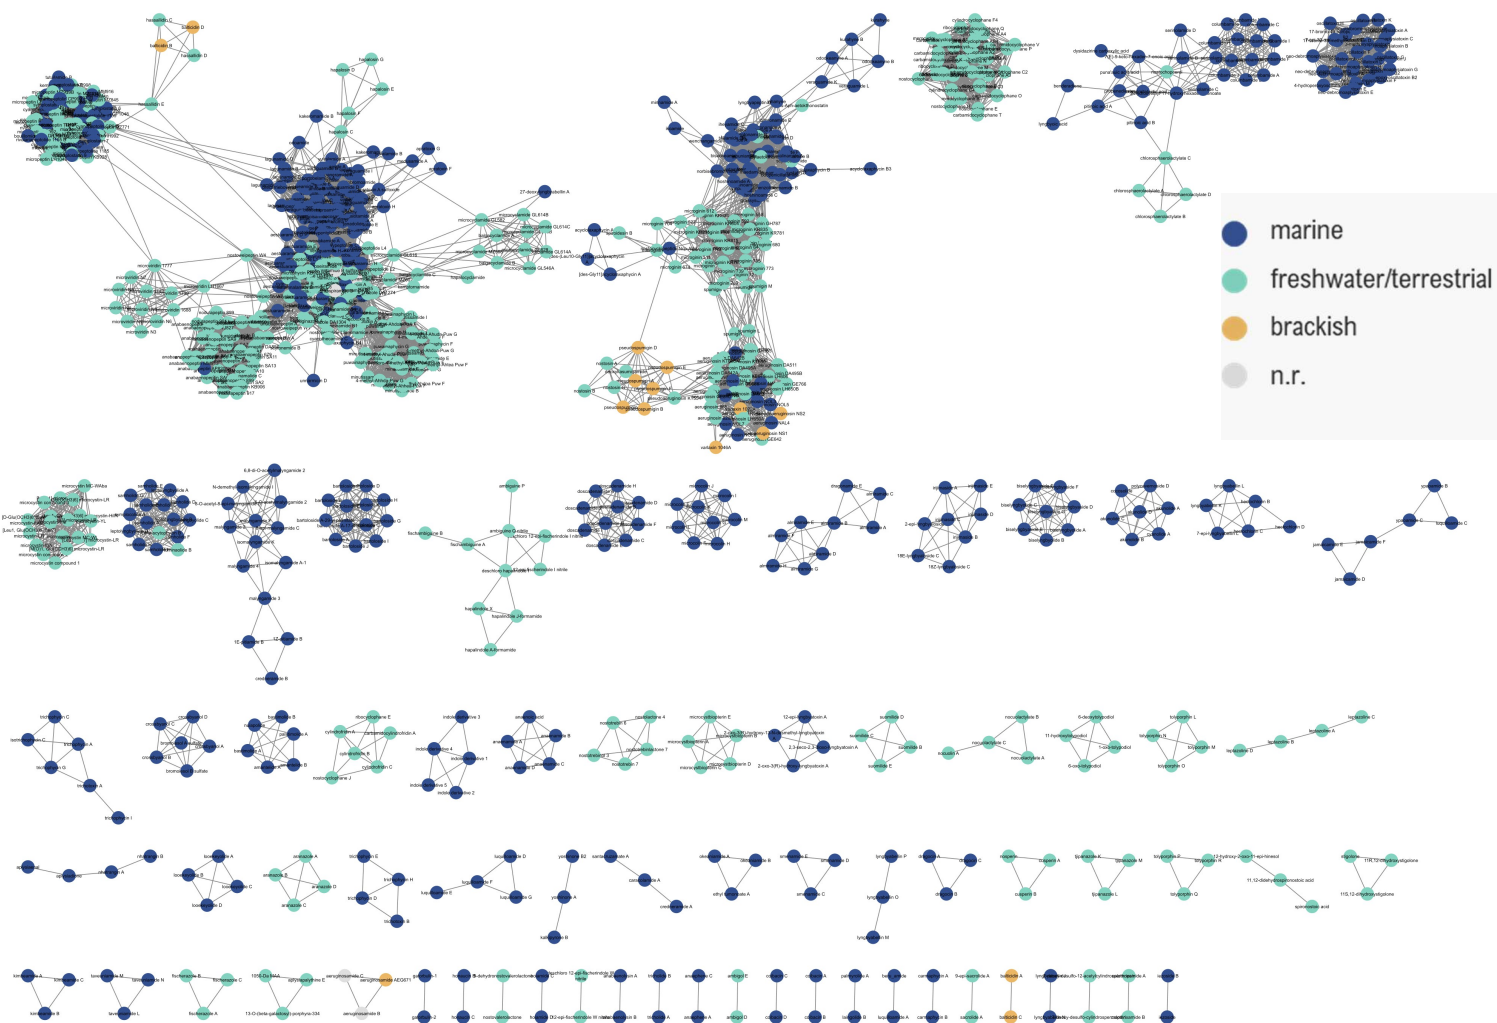

**Figure S2.** Similarity network of the cyanobacterial metabolites reported between 2010 and 2023 with compound labels. Nodes are color coded according to the environmental source of the producing cyanobacteria.

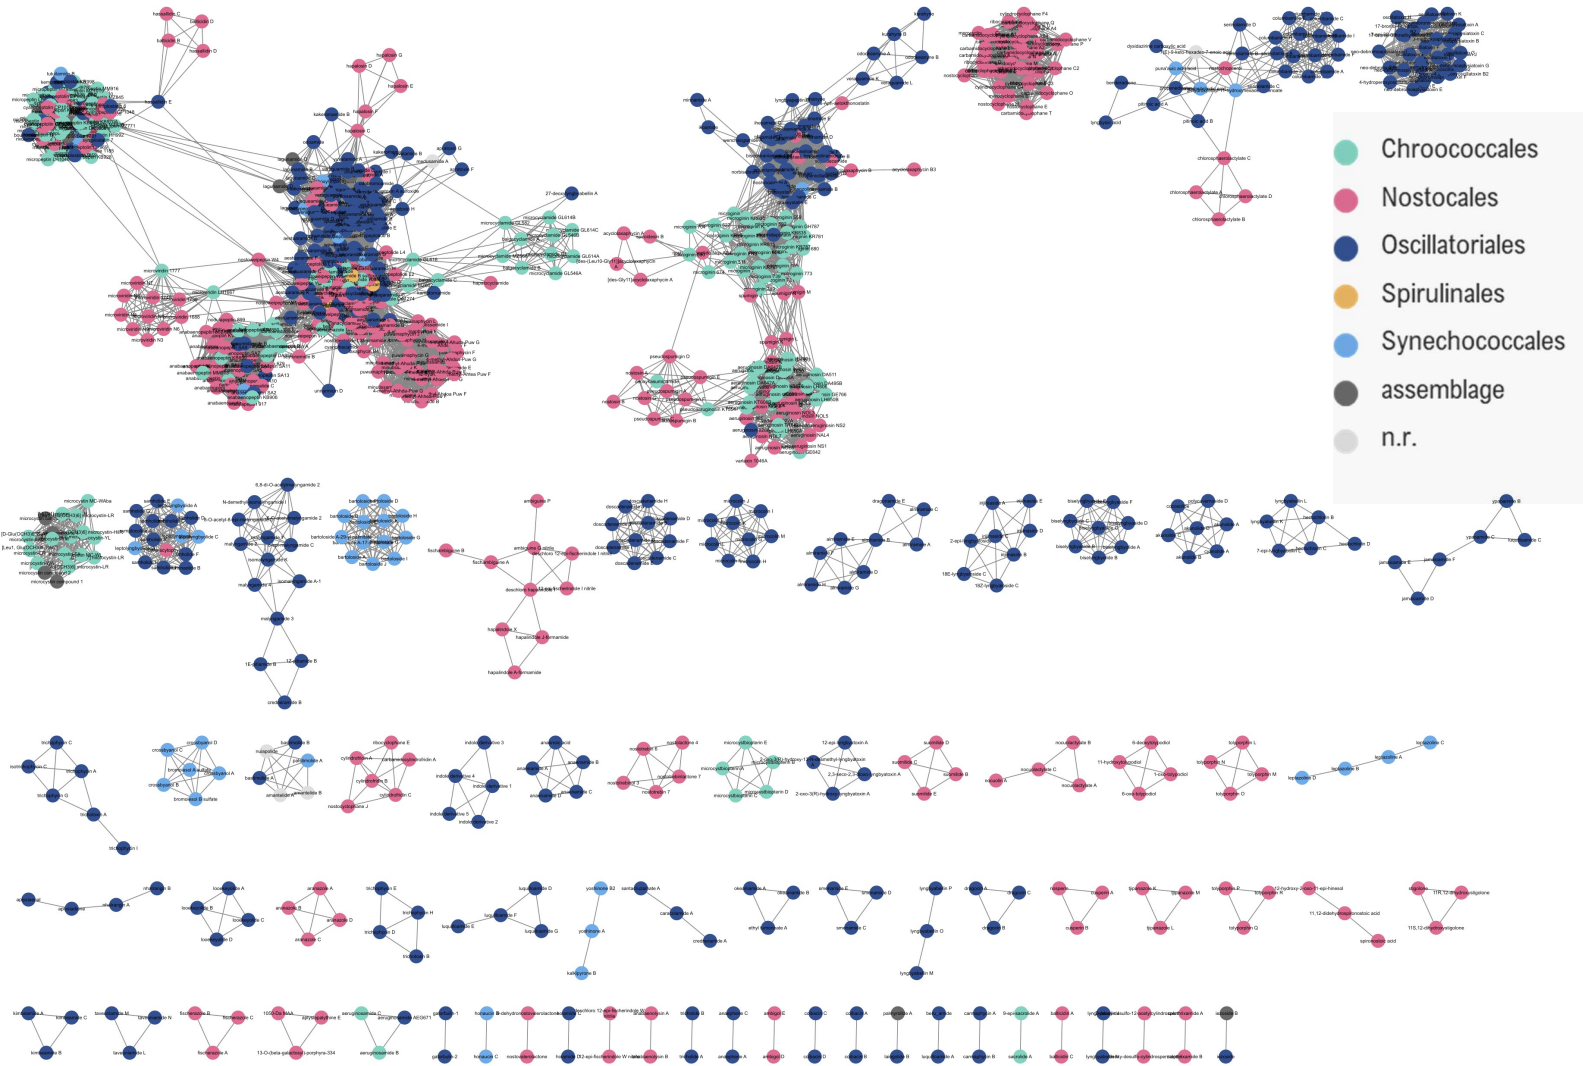

**Figure S3.** Similarity network of the cyanobacterial metabolites reported between 2010 and 2023 with compound labels. Nodes are color coded according to the taxonomic order of the producing cyanobacteria.

**Table S1. Peptides and lipopeptides from cyanobacteria (2010-2023)**

| # | Compound           | Habitat | Producing organism            | DOI               |
|---|--------------------|---------|-------------------------------|-------------------|
| 1 | aeruginosin GE686  | F       | <i>Microcystis aeruginosa</i> | 10.1021/np3005612 |
| 2 | aeruginosin GE766  | F       | <i>Microcystis aeruginosa</i> | 10.1021/np3005612 |
| 3 | aeruginosin GE730  | F       | <i>Microcystis aeruginosa</i> | 10.1021/np3005612 |
| 4 | aeruginosin GE810  | F       | <i>Microcystis aeruginosa</i> | 10.1021/np3005612 |
| 5 | aeruginosin GE642  | F       | <i>Microcystis aeruginosa</i> | 10.1021/np3005612 |
| 6 | aeruginosin KT608A | F       | <i>Microcystis aeruginosa</i> | 10.1021/np200909x |
| 7 | aeruginosin KT608B | F       | <i>Microcystis aeruginosa</i> | 10.1021/np200909x |
| 8 | aeruginosin KT650  | F       | <i>Microcystis aeruginosa</i> | 10.1021/np200909x |
| 9 | aeruginosin GH553  | F       | <i>Microcystis aeruginosa</i> | 10.1021/np200909x |

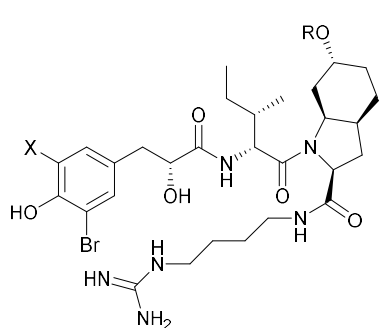

1 aeruginosin GE686    R = H    X = Cl  
 2 aeruginosin GE766    R = SO<sub>3</sub>H    X = Cl  
 3 aeruginosin GE730    R = H    X = Br  
 4 aeruginosin GE810    R = SO<sub>3</sub>H    X = Br

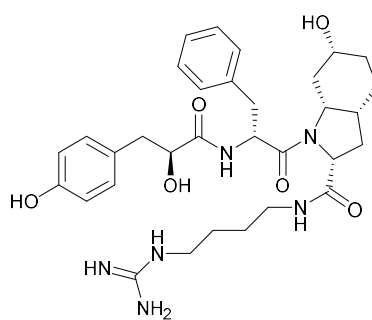

6 aeruginosin KT608A

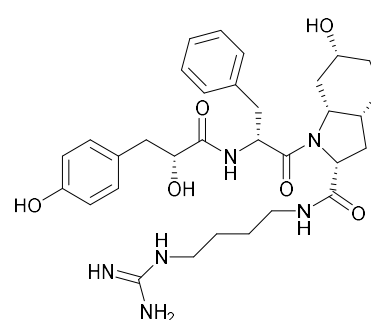

7 aeruginosin KT608B

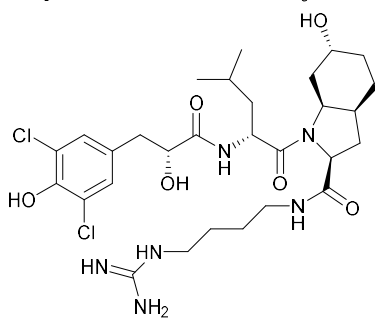

5 aeruginosin GE642

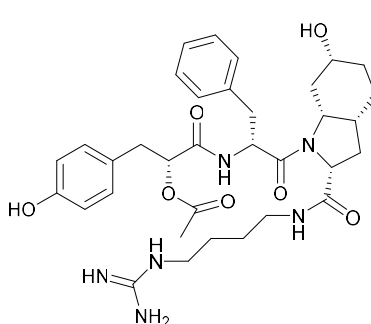

8 aeruginosin KT650

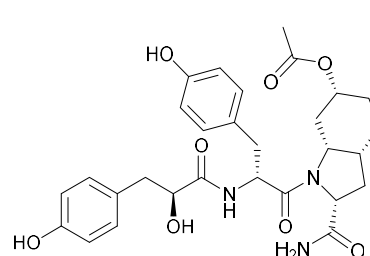

9 aeruginosin GH553

Table S1. (continued)

| #  | Compound           | Habitat | Producing organism            | DOI                       |
|----|--------------------|---------|-------------------------------|---------------------------|
| 10 | aeruginosin DA495A | F       | <i>Microcystis aeruginosa</i> | 10.1021/np4006844         |
| 11 | aeruginosin DA511  | F       | <i>Microcystis aeruginosa</i> | 10.1021/np4006844         |
| 12 | aeruginosin DA642A | F       | <i>Microcystis aeruginosa</i> | 10.1021/np4006844         |
| 13 | aeruginosin DA642B | F       | <i>Microcystis aeruginosa</i> | 10.1021/np4006844         |
| 14 | aeruginosin DA688  | F       | <i>Microcystis aeruginosa</i> | 10.1021/np4006844         |
| 15 | aeruginosin DA722  | F       | <i>Microcystis aeruginosa</i> | 10.1021/np4006844         |
| 16 | aeruginosin DA495B | F       | <i>Microcystis aeruginosa</i> | 10.1021/np4006844         |
| 17 | aeruginosin IN608  | F       | <i>Microcystis aeruginosa</i> | 10.1021/np4001152         |
| 18 | aeruginosin IN652  | F       | <i>Microcystis aeruginosa</i> | 10.1021/np4001152         |
| 19 | aeruginosin LH650A | F       | <i>Microcystis</i> sp.        | 10.1016/j.tet.2014.07.057 |
| 20 | aeruginosin LH650B | F       | <i>Microcystis</i> sp.        | 10.1016/j.tet.2014.07.057 |

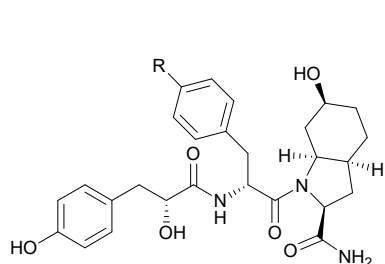

10 aeruginosin DA495A

R = H

11 aeruginosin DA511

R = OH

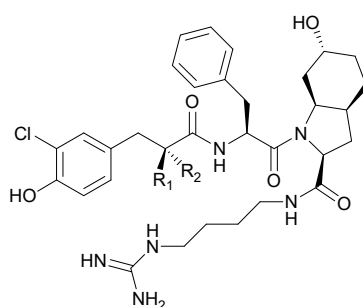

12 aeruginosin DA642A

R<sub>1</sub> = OHR<sub>2</sub> = H

13 aeruginosin DA642B

R<sub>1</sub> = HR<sub>2</sub> = OH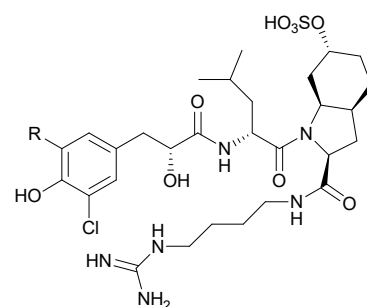

14 aeruginosin DA688

R = H

15 aeruginosin DA722

R = Cl

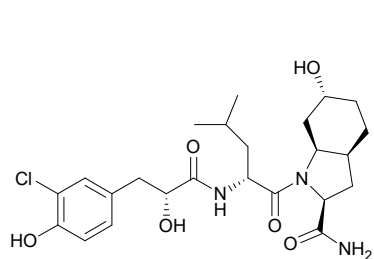

16 aeruginosin DA495B

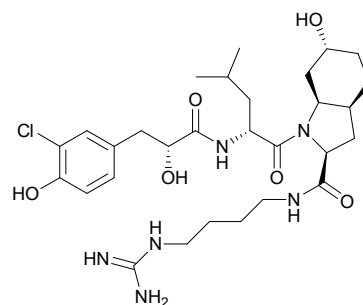

17 aeruginosin IN608

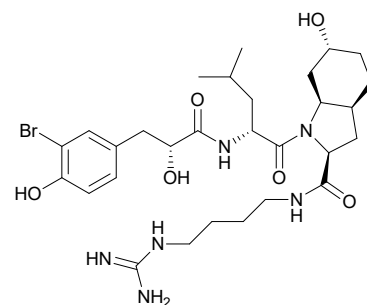

18 aeruginosin IN652

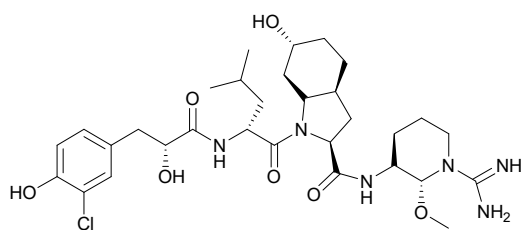

19 aeruginosin LH650A

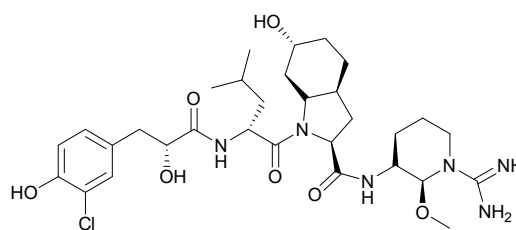

20 aeruginosin LH650B

Table S1. (continued)

| #  | Compound          | Habitat | Producing organism      | DOI                       |
|----|-------------------|---------|-------------------------|---------------------------|
| 21 | aeruginosin LH606 | F       | <i>Microcystis</i> sp.  | 10.1016/j.tet.2014.07.057 |
| 22 | aeruginosin KB676 | F       | <i>Microcystis</i> spp. | 10.3390/md13042347        |
| 23 | aeruginosin TR642 | F       | <i>Microcystis</i> sp.  | 10.3390/md15120371        |
| 24 | aeruginosin 828A  | F       | <i>Planktothrix</i> sp. | 10.1016/j.hal.2014.07.003 |
| 25 | aeruginosin 865   | F       | <i>Nostoc</i> sp.       | 10.1002/cbic.201300246    |

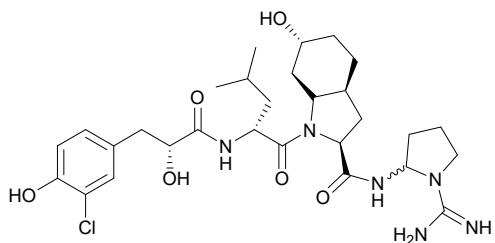

21 aeruginosin LH606

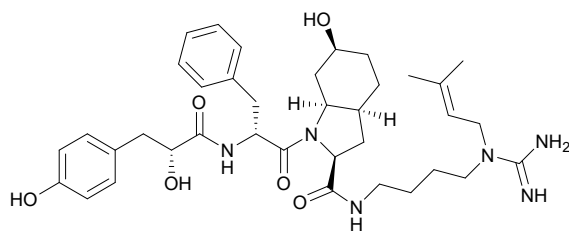

22 aeruginosin KB676

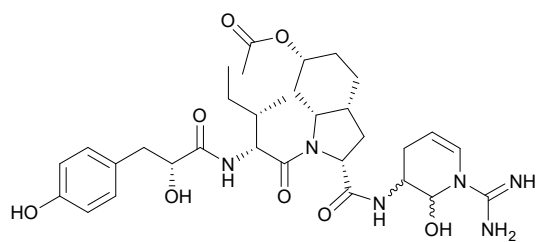

23 aeruginosin TR642

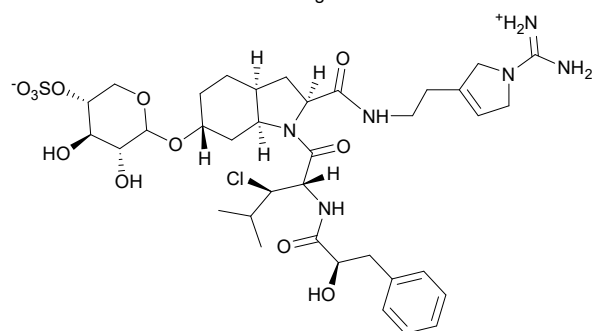

24 aeruginosin 828 A

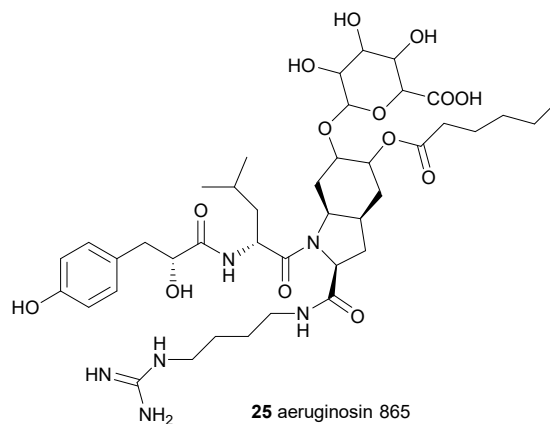

25 aeruginosin 865



Table S1. (continued)

| #  | Compound         | Habitat | Producing organism         | DOI                          |
|----|------------------|---------|----------------------------|------------------------------|
| 26 | aeruginosin NAL1 | M       | <i>Nodularia spumigena</i> | 10.1371/journal.pone.0073618 |
| 27 | aeruginosin NAL2 | M       | <i>Nodularia spumigena</i> | 10.1371/journal.pone.0073618 |
| 28 | aeruginosin NAL3 | M       | <i>Nodularia spumigena</i> | 10.1371/journal.pone.0073618 |
| 29 | aeruginosin NAL4 | M       | <i>Nodularia spumigena</i> | 10.1371/journal.pone.0073618 |
| 30 | aeruginosin NOL1 | M       | <i>Nodularia spumigena</i> | 10.1371/journal.pone.0073618 |
| 31 | aeruginosin NOL2 | M       | <i>Nodularia spumigena</i> | 10.1371/journal.pone.0073618 |
| 32 | aeruginosin NOL3 | M       | <i>Nodularia spumigena</i> | 10.1371/journal.pone.0073618 |
| 33 | aeruginosin NOL4 | M       | <i>Nodularia spumigena</i> | 10.1371/journal.pone.0073618 |

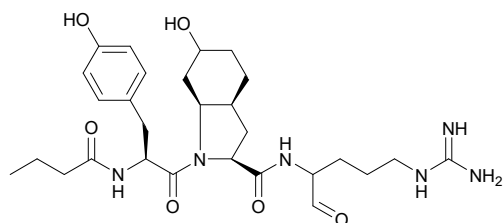

26 aeruginosin NAL1

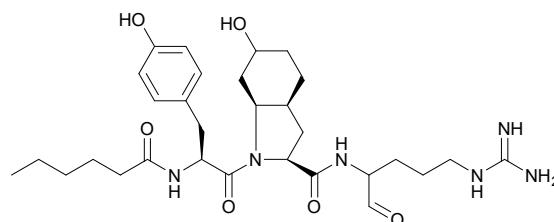

27 aeruginosin NAL2

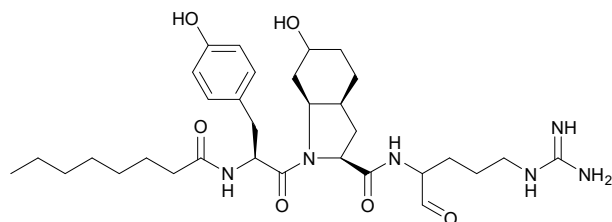

28 aeruginosin NAL3

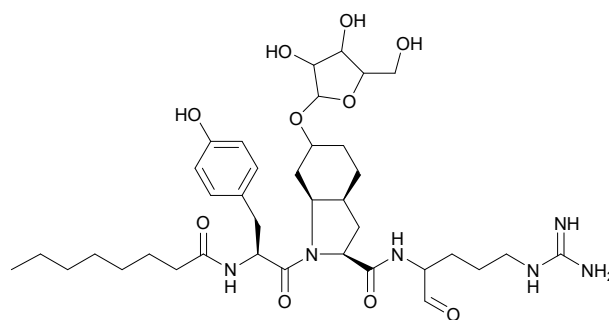

29 aeruginosin NAL4

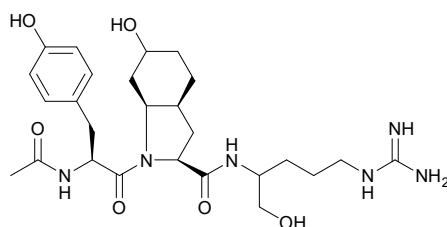

30 aeruginosin NOL1

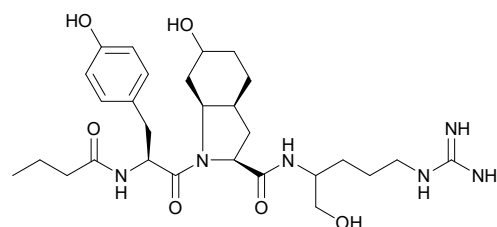

31 aeruginosin NOL2

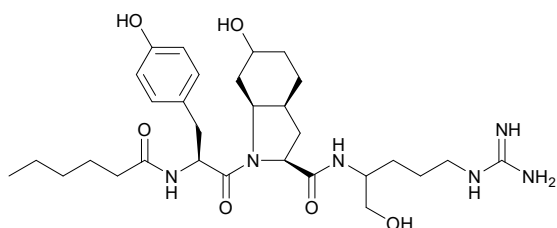

32 aeruginosin NOL3

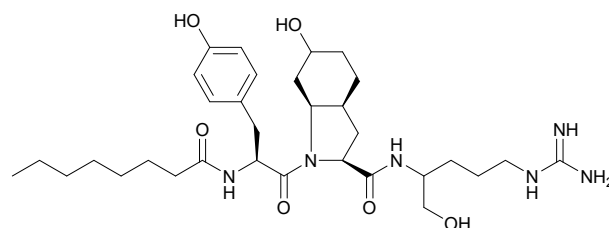

33 aeruginosin NOL4

Table S1. (continued)

| #  | Compound         | Habitat | Producing organism         | DOI                          |
|----|------------------|---------|----------------------------|------------------------------|
| 34 | aeruginosin NOL5 | M       | <i>Nodularia spumigena</i> | 10.1371/journal.pone.0073618 |
| 35 | aeruginosin NOL6 | M       | <i>Nodularia spumigena</i> | 10.1371/journal.pone.0073618 |
| 36 | aeruginosin NOL7 | M       | <i>Nodularia spumigena</i> | 10.1371/journal.pone.0073618 |
| 37 | varlaxin 1046A   | B       | <i>Nostoc</i> sp.          | 10.1039/D1OB02454J           |
| 38 | varlaxin 1022A   | B       | <i>Nostoc</i> sp.          | 10.1039/D1OB02454J           |

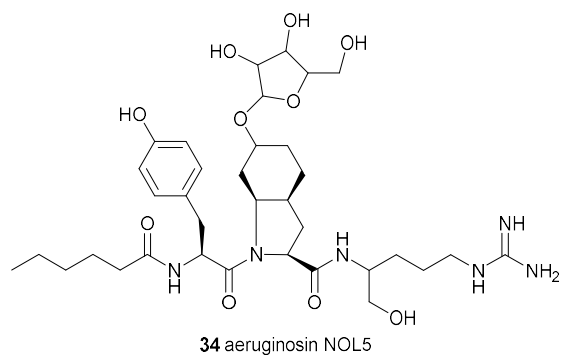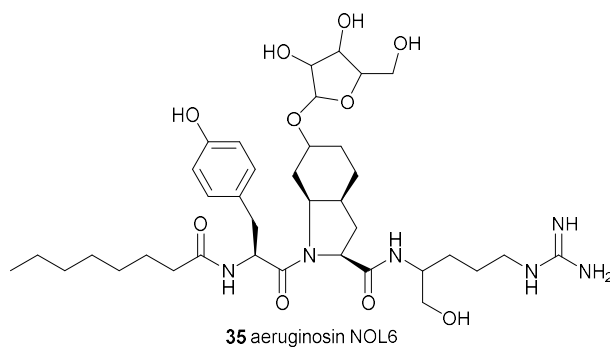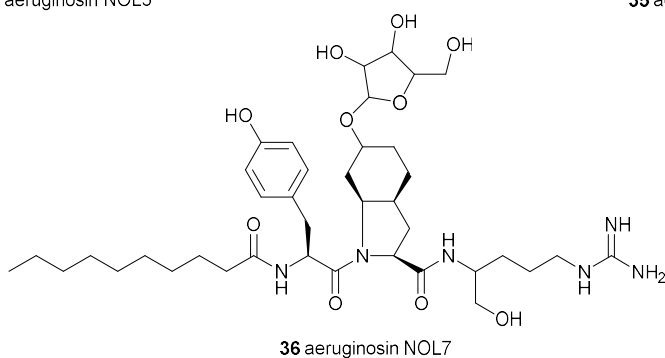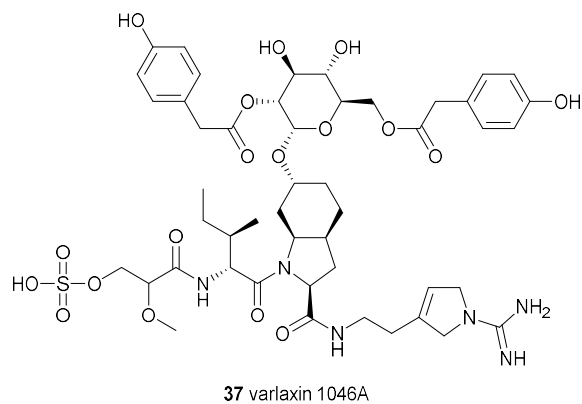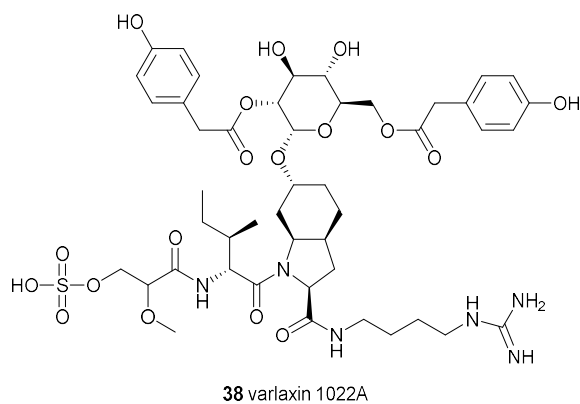

Table S1. (continued)

| #  | Compound                | Habitat | Producing organism                       | DOI                          |
|----|-------------------------|---------|------------------------------------------|------------------------------|
| 39 | pseudoaeruginosin KT554 | F       | <i>Microcystis aeruginosa</i>            | 10.1021/np200909x            |
| 40 | pseudoaeruginosin NS1   | O       | <i>Nodularia spumigena</i>               | 10.1021/cb5004306            |
| 41 | pseudoaeruginosin NS2   | O       | <i>Nodularia spumigena</i>               | 10.1021/cb5004306            |
| 42 | suomilide B             | F       | <i>Nostoc</i> sp.                        | 10.3389/fmicb.2023.1130018   |
| 43 | suomilide C             | F       | <i>Nostoc</i> sp.                        | 10.3389/fmicb.2023.1130018   |
| 44 | suomilide D             | F       | <i>Nostoc</i> sp.                        | 10.3389/fmicb.2023.1130018   |
| 45 | suomilide E             | F       | <i>Nostoc</i> sp.                        | 10.3389/fmicb.2023.1130018   |
| 46 | spumigin J              | F       | <i>Anabaena compacta</i>                 | 10.1021/np300282a            |
| 47 | spumigin K              | F       | <i>Sphaerospermopsis torques-reginae</i> | 10.1021/acs.jnatprod.7b00370 |
| 48 | spumigin L              | F       | <i>Sphaerospermopsis torques-reginae</i> | 10.1021/acs.jnatprod.7b00370 |
| 49 | spumigin M              | F       | <i>Sphaerospermopsis torques-reginae</i> | 10.1021/acs.jnatprod.7b00370 |
| 50 | spumigin N              | F       | <i>Sphaerospermopsis torques-reginae</i> | 10.1021/acs.jnatprod.7b00370 |

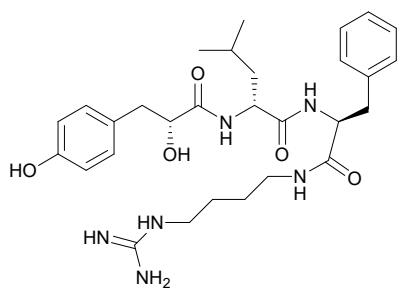

39 Pseudoaeruginosin KT554

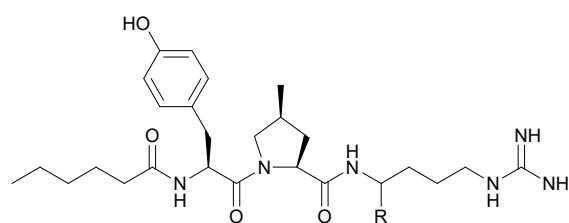

40 pseudoaeruginosin NS1 R1 CHO

41 pseudoaeruginosin NS2 R1 CH2OH

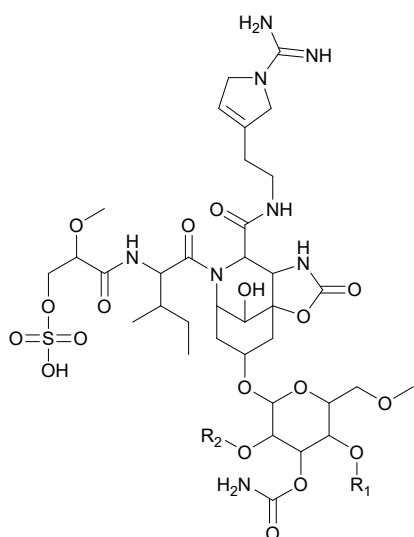

42 suomilide B R<sub>1</sub> hexanoic acid R<sub>2</sub> butyric acid  
 43 suomilide C R<sub>1</sub> H R<sub>2</sub> butyric acid  
 44 suomilide D R<sub>1</sub> H R<sub>2</sub> hexanoic acid  
 45 suomilide E R<sub>1</sub> butyric acid R<sub>2</sub> butyric acid

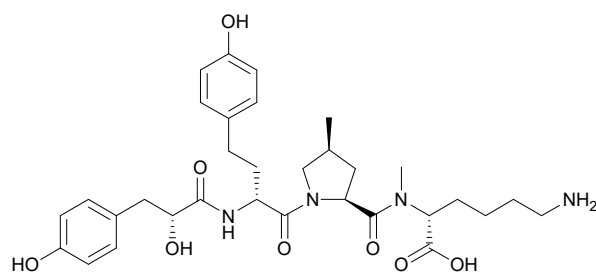

46 spumigin J

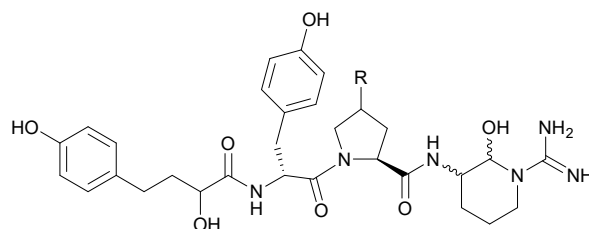47 spumigin K R CH<sub>3</sub> D-Argal48 spumigin L R CH<sub>3</sub> L-Argal

49 spumigin M R H D-Argal

50 spumigin N R H L-Argal

Table S1. (continued)

| #   | Compound             | Habitat | Producing organism            | DOI                          |
|-----|----------------------|---------|-------------------------------|------------------------------|
| 51  | pseudospumigin A     | B       | <i>Nostoc</i> sp.             | 10.3389/fmicb.2017.01963     |
| 52  | pseudospumigin B     | B       | <i>Nostoc</i> sp.             | 10.3389/fmicb.2017.01963     |
| 53  | pseudospumigin C     | B       | <i>Nostoc</i> sp.             | 10.3389/fmicb.2017.01963     |
| 54  | pseudospumigin D     | B       | <i>Nostoc</i> sp.             | 10.3389/fmicb.2017.01963     |
| 55  | pseudospumigin E     | B       | <i>Nostoc</i> sp.             | 10.3389/fmicb.2017.01963     |
| 56  | pseudospumigin F     | B       | <i>Nostoc</i> sp.             | 10.3389/fmicb.2017.01963     |
| 57  | nostosin G           | F       | <i>Dolichospermum</i> sp.     | 10.1021/acs.jnatprod.2c00382 |
| 58  | nostosin A           | F       | <i>Nostoc</i> sp.             | 10.1021/np500106w            |
| 59  | nostosin B           | F       | <i>Nostoc</i> sp.             | 10.1021/np500106w            |
| 60  | spiroidesin B        | F       | <i>Dolichospermum</i> sp.     | 10.1021/acs.jnatprod.2c00382 |
| 61* | microguanidine KT636 | F       | <i>Microcystis aeruginosa</i> | 10.1021/np200909x            |
| 62* | microguanidine DA368 | F       | <i>Microcystis aeruginosa</i> | 10.1021/np4006844            |

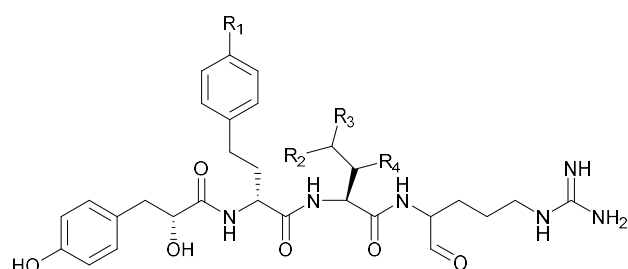

|                     |                |    |                |     |
|---------------------|----------------|----|----------------|-----|
| 51 pseudospumigin A | R <sub>1</sub> | OH | R <sub>2</sub> | Ile |
| 52 pseudospumigin B | R <sub>1</sub> | OH | R <sub>2</sub> | Leu |
| 53 pseudospumigin C | R <sub>1</sub> | OH | R <sub>2</sub> | Val |
| 54 pseudospumigin D | R <sub>1</sub> | H  | R <sub>2</sub> | Ile |
| 55 pseudospumigin E | R <sub>1</sub> | H  | R <sub>2</sub> | Leu |
| 56 pseudospumigin F | R <sub>1</sub> | H  | R <sub>2</sub> | Val |

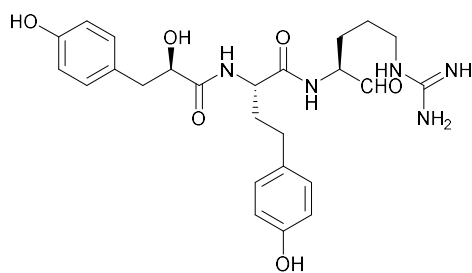

57 nostosin G

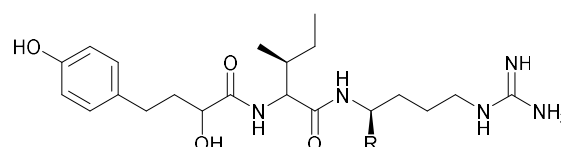

|               |   |                     |
|---------------|---|---------------------|
| 58 nostosin A | R | -CHO                |
| 59 nostosin B | R | -CH <sub>2</sub> OH |

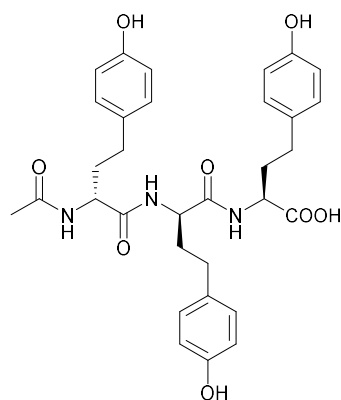

60 spiroidesin B

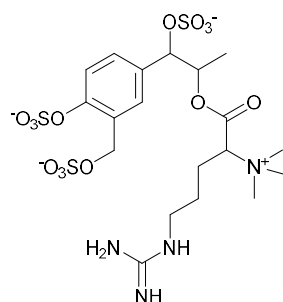

61\* microguanidine KT636

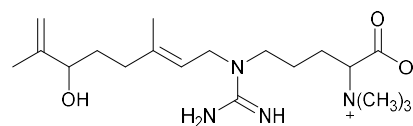

62\* microguanidine DA368

Table S1. (continued)

| #   | Compound                 | Habitat | Producing organism            | DOI                        |
|-----|--------------------------|---------|-------------------------------|----------------------------|
| 63* | microguanidine amide 771 | F       | <i>Microcystis aeruginosa</i> | 10.1021/acschembio.8b00918 |
| 64  | microginin GH787         | F       | <i>Microcystis</i> sp.        | 10.1016/j.tet.2011.04.042  |
| 65  | microginin KR767         | F       | <i>Microcystis</i> sp.        | 10.3390/md16030078         |
| 66  | microginin KR801         | F       | <i>Microcystis</i> sp.        | 10.3390/md16030078         |
| 67  | microginin KR835         | F       | <i>Microcystis</i> sp.        | 10.3390/md16030078         |

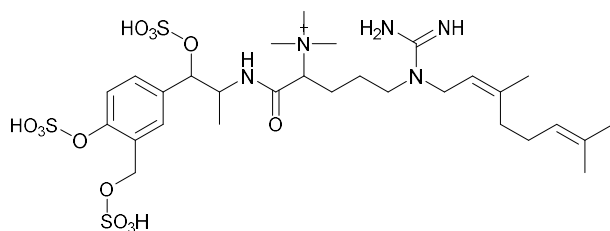

63\* microguanidine amide 771

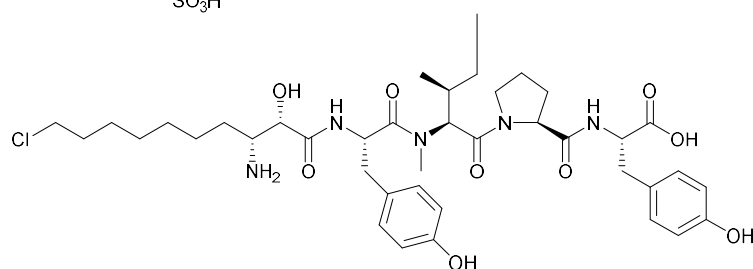

64 microginin GH787

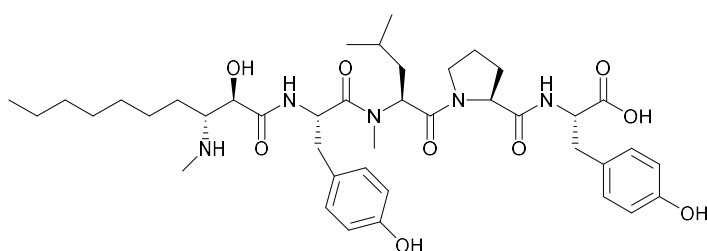

65 microginin KR767

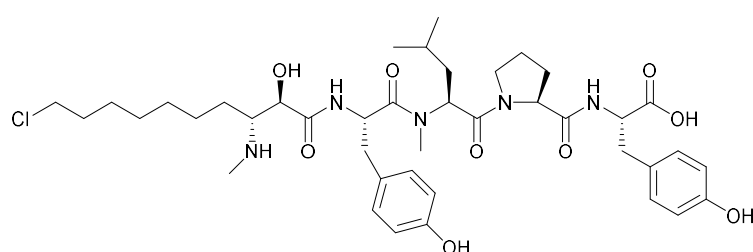

66 microginin KR801

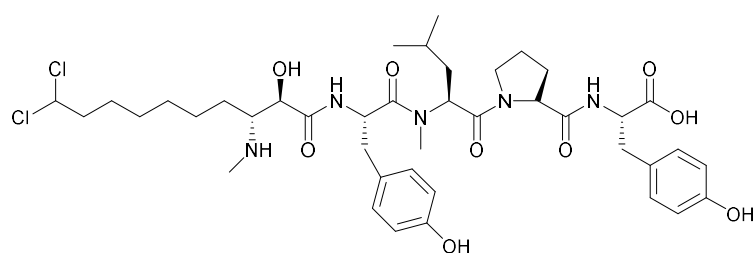

67 microginin KR835

Table S1. (continued)

| #  | Compound         | Habitat | Producing organism     | DOI                |
|----|------------------|---------|------------------------|--------------------|
| 67 | microginin KR835 | F       | <i>Microcystis</i> sp. | 10.3390/md16030078 |
| 68 | microginin KR787 | F       | <i>Microcystis</i> sp. | 10.3390/md16030078 |
| 69 | microginin KR604 | F       | <i>Microcystis</i> sp. | 10.3390/md16030078 |
| 70 | microginin KR638 | F       | <i>Microcystis</i> sp. | 10.3390/md16030078 |
| 71 | microginin KR781 | F       | <i>Microcystis</i> sp. | 10.3390/md16030078 |
| 72 | microginin KR815 | F       | <i>Microcystis</i> sp. | 10.3390/md16030078 |
| 73 | microginin FR3   | F       | <i>Microcystis</i> sp. | 10.3390/md16030078 |
| 74 | microginin FR4   | F       | <i>Microcystis</i> sp. | 10.3390/md16030078 |

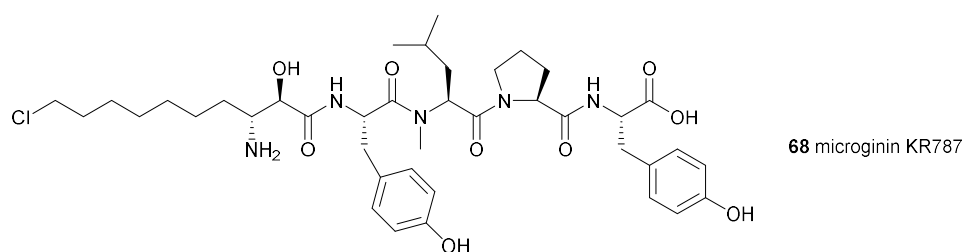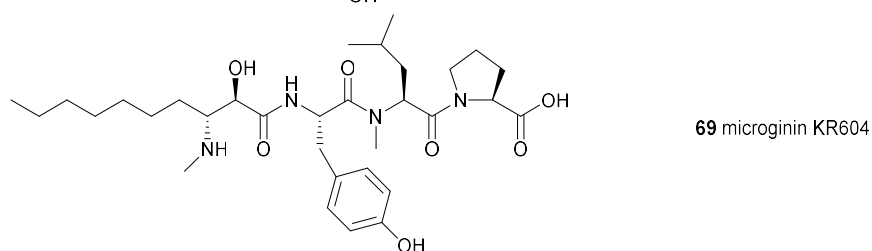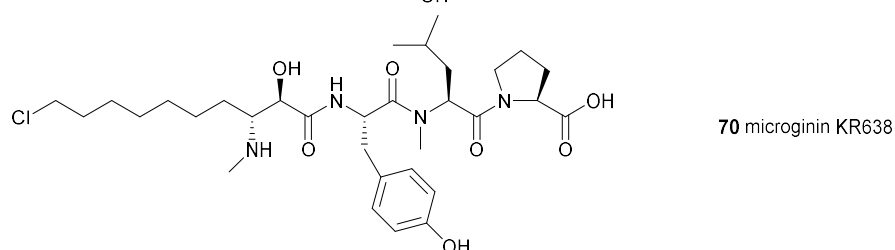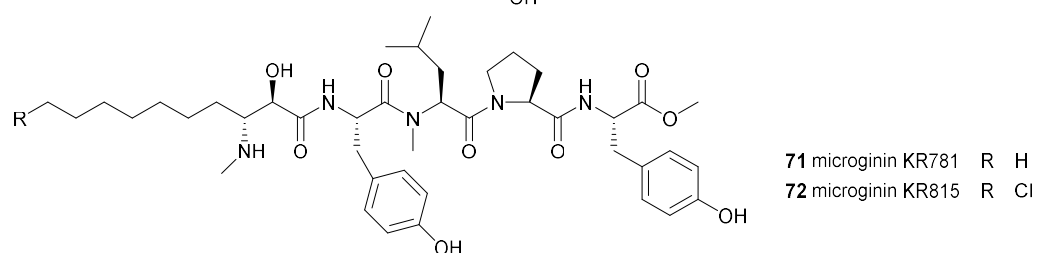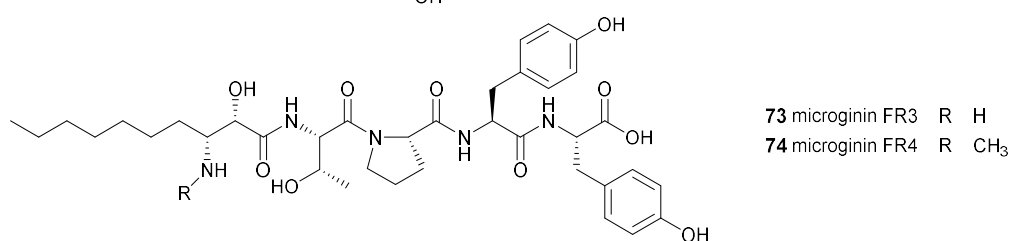

Table S1. (continued)

| #  | Compound       | Habitat | Producing organism            | DOI                          |
|----|----------------|---------|-------------------------------|------------------------------|
| 75 | microginin 680 | F       | <i>Microcystis aeruginosa</i> | 10.1016/j.tetlet.2016.03.039 |
| 76 | microginin 646 | F       | <i>Microcystis aeruginosa</i> | 10.1016/j.tetlet.2016.03.039 |
| 77 | microginin 612 | F       | <i>Microcystis aeruginosa</i> | 10.1016/j.tetlet.2016.03.039 |
| 78 | microginin 674 | F       | <i>Microcystis aeruginosa</i> | 10.1021/acs.jnatprod.7b00829 |
| 79 | microginin 690 | F       | <i>Microcystis aeruginosa</i> | 10.1021/acs.jnatprod.7b00829 |
| 80 | microginin 704 | F       | <i>Microcystis aeruginosa</i> | 10.1021/acs.jnatprod.7b00829 |
| 81 | microginin 527 | F       | <i>Microcystis aeruginosa</i> | 10.1021/acs.jnatprod.7b00829 |
| 82 | microginin 511 | F       | <i>Microcystis aeruginosa</i> | 10.1021/acs.jnatprod.7b00829 |

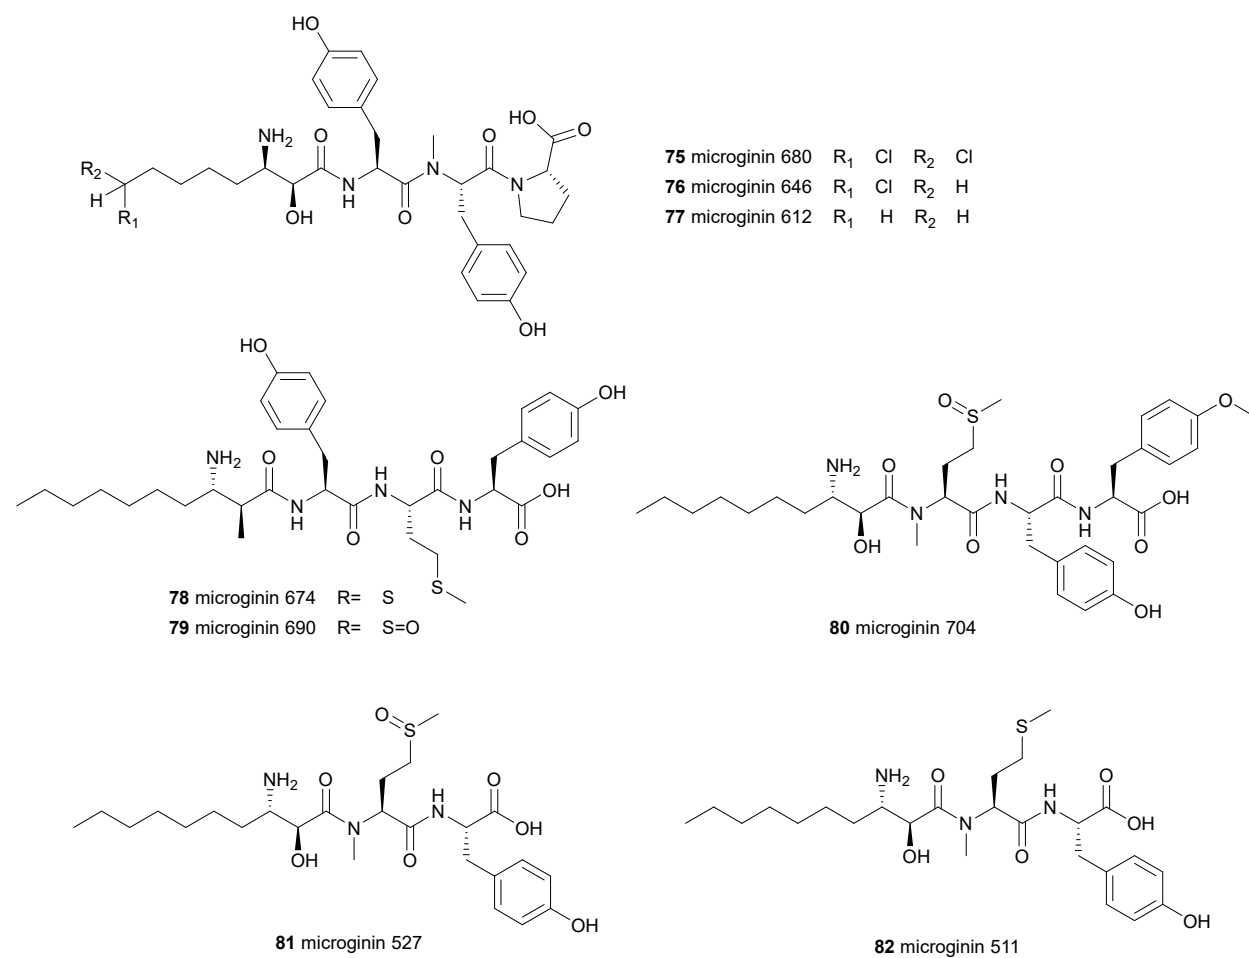

Table S1. (continued)

| #  | Compound       | Habitat | Producing organism            | DOI                       |
|----|----------------|---------|-------------------------------|---------------------------|
| 83 | microginin 789 | F       | <i>Microcystis aeruginosa</i> | 10.1021/acssynbio.2c00389 |
| 84 | microginin 755 | F       | <i>Microcystis aeruginosa</i> | 10.1021/acssynbio.2c00389 |
| 85 | microginin 721 | F       | <i>Microcystis aeruginosa</i> | 10.1021/acssynbio.2c00389 |
| 86 | microginin 773 | F       | <i>Microcystis aeruginosa</i> | 10.1021/acssynbio.2c00389 |
| 87 | microginin 739 | F       | <i>Microcystis aeruginosa</i> | 10.1021/acssynbio.2c00389 |
| 88 | microginin 705 | F       | <i>Microcystis aeruginosa</i> | 10.1021/acssynbio.2c00389 |
| 89 | microginin 626 | F       | <i>Microcystis aeruginosa</i> | 10.1021/acssynbio.2c00389 |
| 90 | microginin 592 | F       | <i>Microcystis aeruginosa</i> | 10.1021/acssynbio.2c00389 |
| 91 | microginin 558 | F       | <i>Microcystis aeruginosa</i> | 10.1021/acssynbio.2c00389 |

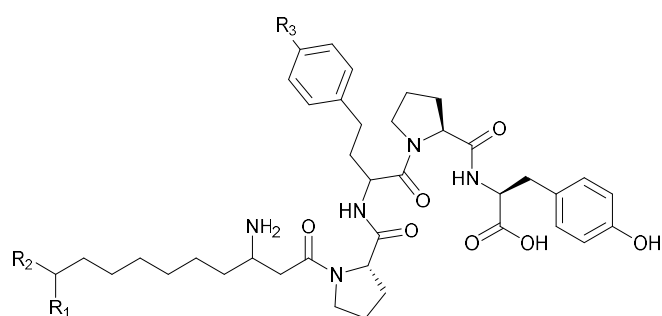

|    |                |                |    |                |    |                |    |
|----|----------------|----------------|----|----------------|----|----------------|----|
| 83 | microginin 789 | R <sub>1</sub> | Cl | R <sub>2</sub> | Cl | R <sub>3</sub> | OH |
| 84 | microginin 755 | R <sub>1</sub> | Cl | R <sub>2</sub> | H  | R <sub>3</sub> | OH |
| 85 | microginin 721 | R <sub>1</sub> | H  | R <sub>2</sub> | H  | R <sub>3</sub> | OH |
| 86 | microginin 773 | R <sub>1</sub> | Cl | R <sub>2</sub> | Cl | R <sub>3</sub> | H  |
| 87 | microginin 739 | R <sub>1</sub> | Cl | R <sub>2</sub> | H  | R <sub>3</sub> | H  |
| 88 | microginin 705 | R <sub>1</sub> | H  | R <sub>2</sub> | H  | R <sub>3</sub> | H  |

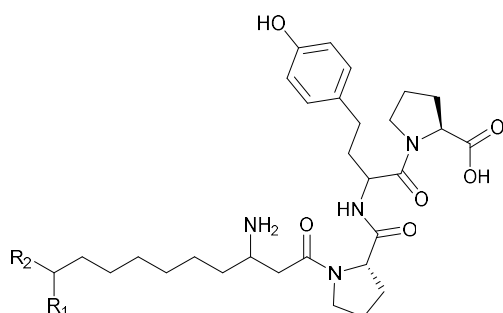

|    |                |                |    |                |    |
|----|----------------|----------------|----|----------------|----|
| 89 | microginin 626 | R <sub>1</sub> | H  | R <sub>2</sub> | H  |
| 90 | microginin 592 | R <sub>1</sub> | Cl | R <sub>2</sub> | H  |
| 91 | microginin 558 | R <sub>1</sub> | Cl | R <sub>2</sub> | Cl |



Table S1. (continued)

| #  | Compound             | Habitat | Producing organism            | DOI                       |
|----|----------------------|---------|-------------------------------|---------------------------|
| 92 | anabaenopeptin MM823 | F       | <i>Microcystis</i> sp.        | 10.1016/j.tet.2010.09.067 |
| 93 | anabaenopeptin MM850 | F       | <i>Microcystis</i> sp.        | 10.1016/j.tet.2010.09.067 |
| 94 | anabaenopeptin MM913 | F       | <i>Microcystis</i> sp.        | 10.1016/j.tet.2010.09.067 |
| 95 | anabaenopeptin DA850 | F       | <i>Microcystis aeruginosa</i> | 10.1021/np4006844         |
| 96 | anabaenopeptin KB906 | F       | <i>Microcystis</i> spp.       | 10.3390/md13042347        |
| 97 | anabaenopeptin KB899 | F       | <i>Microcystis</i> spp.       | 10.3390/md13042347        |

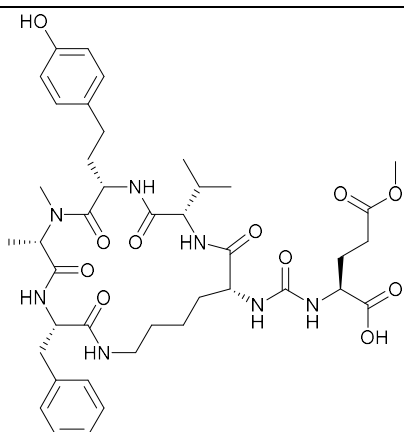

92 anabaenopeptin MM823

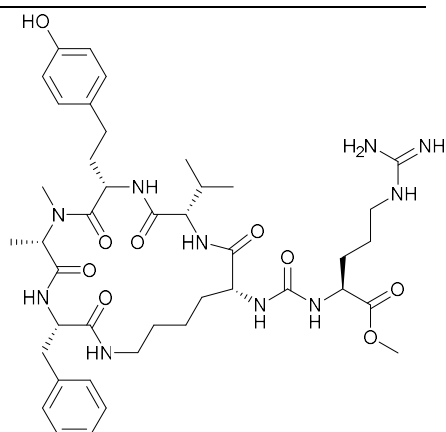

93 anabaenopeptin MM850

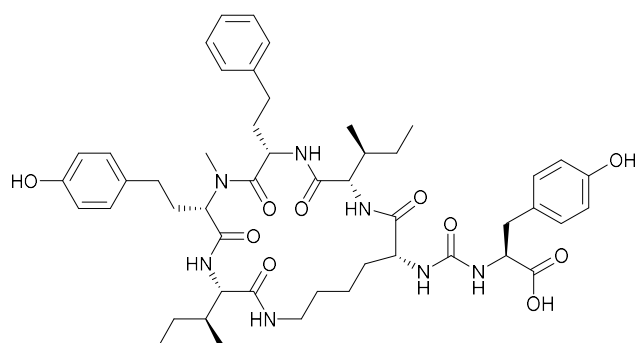

94 anabaenopeptin MM913

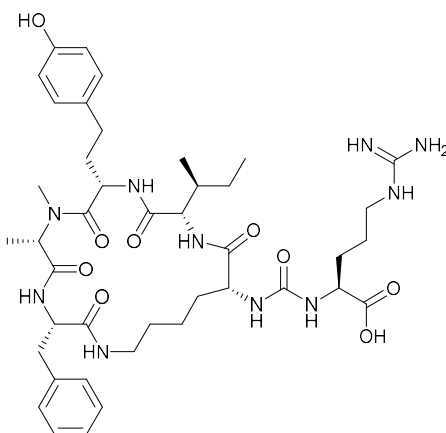

95 anabaenopeptin DA850

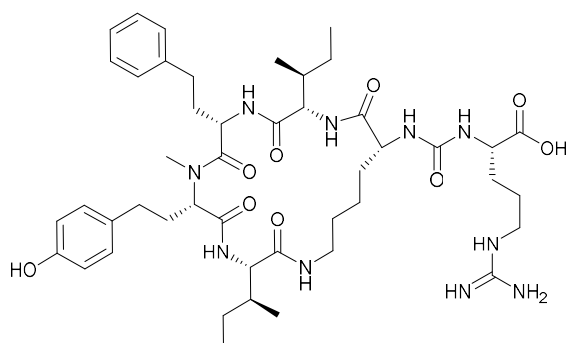

96 anabaenopeptin KB906

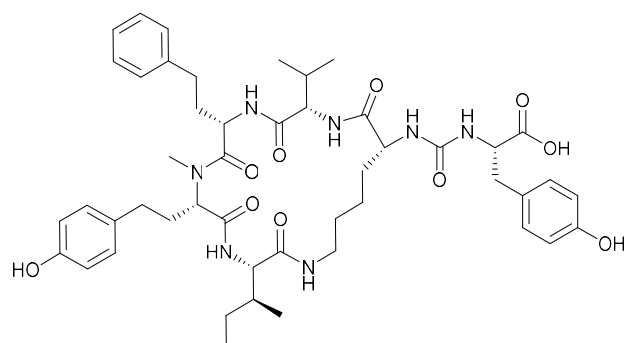

97 anabaenopeptin KB899

Table S1. (continued)

| #   | Compound                                   | Habitat | Producing organism            | DOI                |
|-----|--------------------------------------------|---------|-------------------------------|--------------------|
| 98  | <sup>1</sup> [Dht]-anabaenopeptin A        | F       | <i>Microcystis aeruginosa</i> | 10.3390/md21070401 |
| 99  | hydantoanabaenopeptin A                    | F       | <i>Microcystis aeruginosa</i> | 10.3390/md21070401 |
| 100 | hydantoanabaenopeptin B                    | F       | <i>Microcystis aeruginosa</i> | 10.3390/md21070401 |
| 101 | hydantoanabaenopeptin F                    | F       | <i>Microcystis aeruginosa</i> | 10.3390/md21070401 |
| 102 | hydanto-oscillamide Y                      | F       | <i>Microcystis aeruginosa</i> | 10.3390/md21070401 |
| 103 | <sup>1</sup> [Dht]-hydantoanabaenopeptin A | F       | <i>Microcystis aeruginosa</i> | 10.3390/md21070401 |

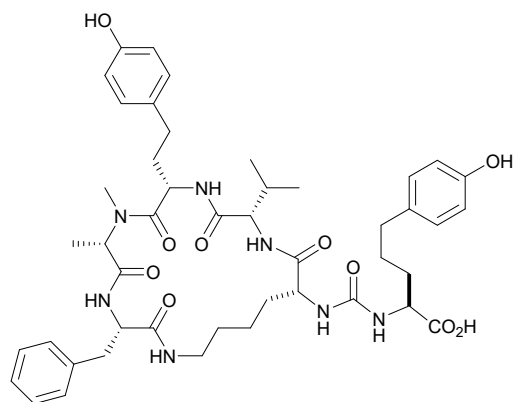98 <sup>1</sup>[Dht]-Anabaenopeptin A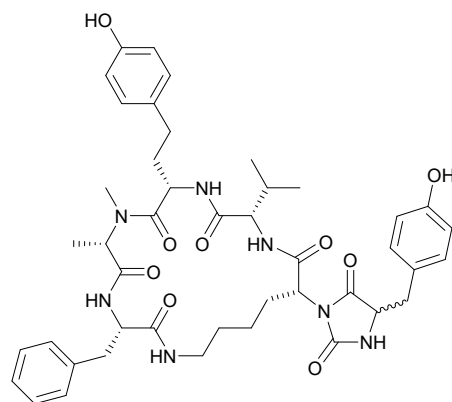

99 hydantoanabaenopeptin A

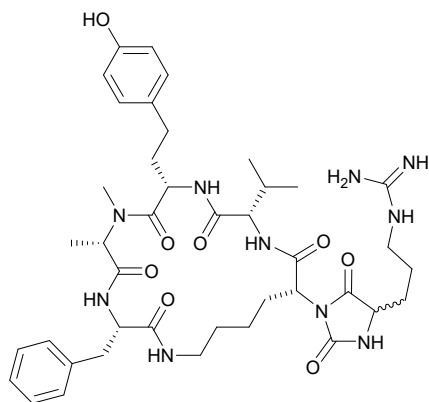

100 hydantoanabaenopeptin B

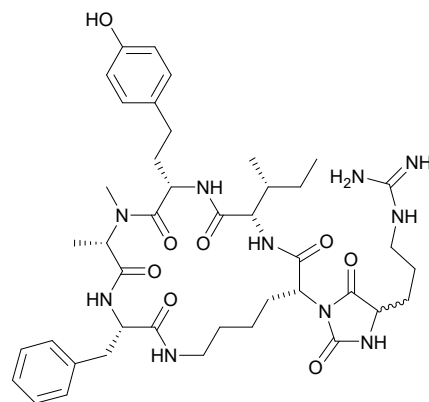

101 hydantoanabaenopeptin F

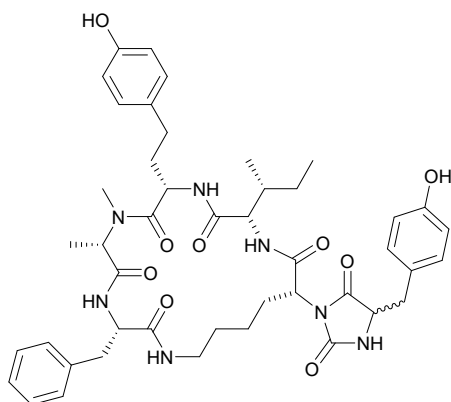

102 hydanto-oscillamide Y

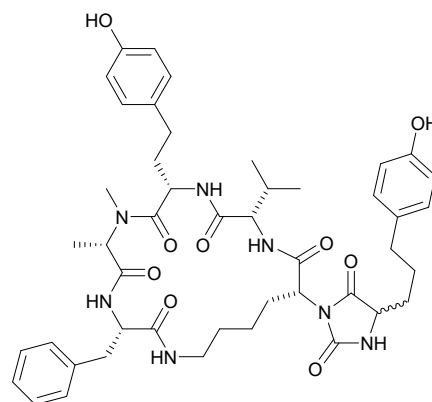103 <sup>1</sup>[Dht]-Hydantoanabaenopeptin A

Table S1. (continued)

| #   | Compound                | Habitat | Producing organism             | DOI                           |
|-----|-------------------------|---------|--------------------------------|-------------------------------|
| 104 | nodulapeptin 901        | F       | <i>Nodularia spumigena</i>     | 10.1016/j.tet.2011.11.056     |
| 105 | nodulapeptin 917        | F       | <i>Nodularia spumigena</i>     | 10.1016/j.tet.2011.11.056     |
| 106 | nodulapeptin 899        | F       | <i>Nodularia spumigena</i>     | 10.1016/j.tet.2011.11.056     |
| 107 | anabaenopeptin 788      | F       | <i>Brasilonema</i> sp.         | 10.3390/molecules25173786     |
| 108 | anabaenopeptin 802 (2a) | F       | <i>Brasilonema</i> sp.         | 10.3390/molecules25173786     |
| 109 | anabaenopeptin 802 (2b) | F       | <i>Brasilonema</i> sp.         | 10.3390/molecules25173786     |
| 110 | anabaenopeptin 816      | F       | <i>Brasilonema</i> sp.         | 10.3390/molecules25173786     |
| 111 | anabaenopeptin 899      | F       | <i>Woronichinia naegeliana</i> | 10.1080/09670262.2020.1813809 |
| 112 | anabaenopeptin AP820Ne  | M       | <i>Nostoc edaphicum</i>        | 10.3390/ijerph191912346       |

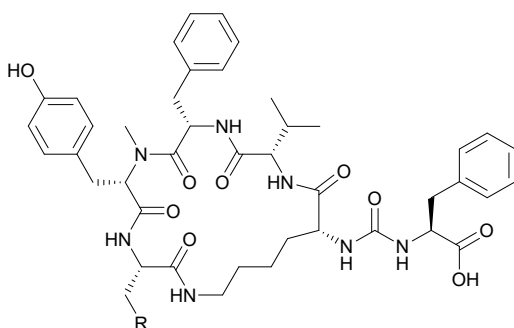

- 104** Nodulapeptin 901    R = CH<sub>2</sub>SCH<sub>3</sub>  
**105** Nodulapeptin 917    R = CH<sub>2</sub>S(=O)CH<sub>3</sub>  
**106** Nodulapeptin 899    R = OAc

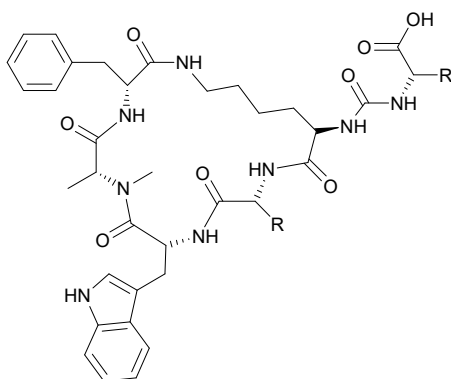

- 107** anabaenopeptin 788    R<sub>1</sub> CH-(CH<sub>3</sub>)<sub>2</sub>    R<sub>2</sub> CH-(CH<sub>3</sub>)<sub>2</sub>  
**108** anabaenopeptin 802 (2a)    R<sub>1</sub> CH-(CH<sub>3</sub>)<sub>2</sub>    R<sub>2</sub> HC-CH(CH<sub>3</sub>)-CH<sub>3</sub>  
**109** anabaenopeptin 802 (2b)    R<sub>1</sub> CH-(CH<sub>3</sub>)<sub>2</sub>    R<sub>2</sub> CH<sub>2</sub>-CH-(CH<sub>3</sub>)<sub>2</sub>  
**110** anabaenopeptin 816    R<sub>1</sub> CH-CH<sub>2</sub>-(CH<sub>3</sub>)<sub>2</sub>    R<sub>2</sub> CH-CH<sub>2</sub>-(CH<sub>3</sub>)<sub>2</sub>

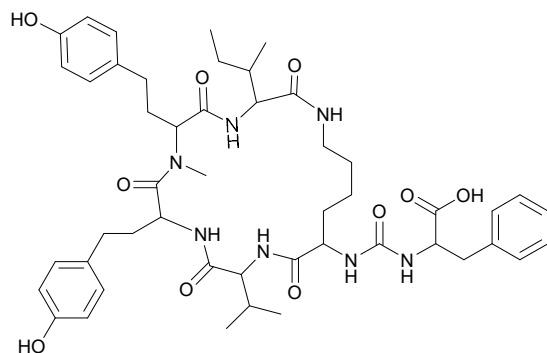

111 anabaenopeptin 899

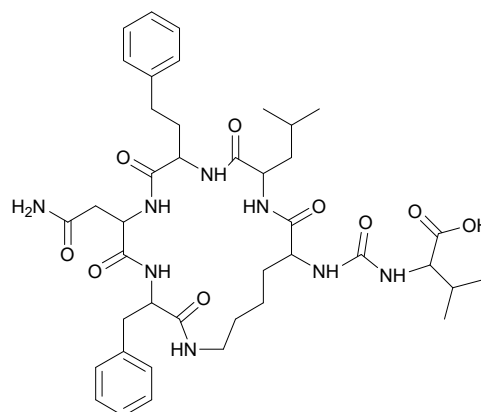

112 anabaenopeptin AP820Ne

Table S1. (continued)

| #   | Compound              | Habitat | Producing organism                       | DOI                             |
|-----|-----------------------|---------|------------------------------------------|---------------------------------|
| 113 | lyngbyaureidamide A   | F       | <i>Lyngbya</i> sp.                       | 10.1016/j.phytochem.2011.09.017 |
| 114 | lyngbyaureidamide B   | F       | <i>Lyngbya</i> sp.                       | 10.1016/j.phytochem.2011.09.017 |
| 115 | namalide B            | F       | <i>Sphaerospermopsis torques-reginae</i> | 10.1021/acs.jnatprod.7b00370    |
| 116 | namalide C            | F       | <i>Sphaerospermopsis torques-reginae</i> | 10.1021/acs.jnatprod.7b00370    |
| 117 | anabaenopeptin KVJ827 | F       | <i>Nostoc punctiforme</i>                | 10.1128/AEM.01510-17            |
| 118 | anabaenopeptin KVJ841 | F       | <i>Nostoc punctiforme</i>                | 10.1128/AEM.01510-17            |
| 119 | anabaenopeptin KVJ811 | F       | <i>Nostoc punctiforme</i>                | 10.1128/AEM.01510-17            |
| 120 | anabaenopeptin 679    | F       | assemblage                               | 10.1016/j.bmcl.2016.09.008      |

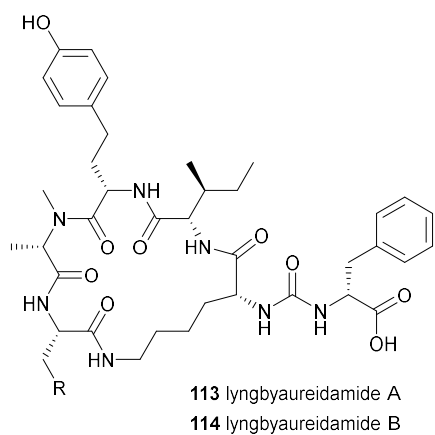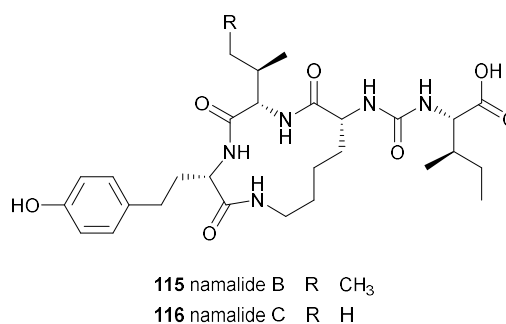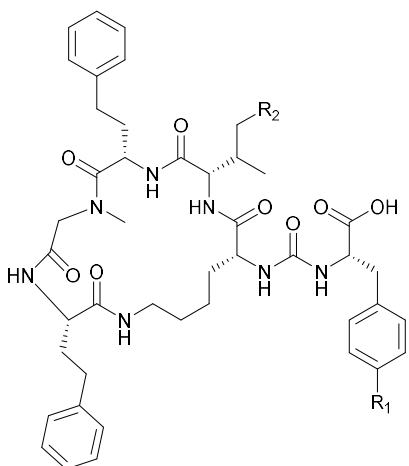

- 117 anabaenopeptin KVJ827 R<sub>1</sub> OH R<sub>2</sub> H  
118 anabaenopeptin KVJ827 R<sub>1</sub> OH R<sub>2</sub> Me  
119 anabaenopeptin KVJ827 R<sub>1</sub> H R<sub>2</sub> H

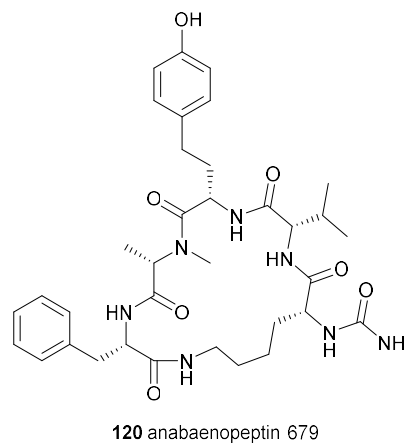

Table S1. (continued)

| #   | Compound           | Habitat | Producing organism            | DOI               |
|-----|--------------------|---------|-------------------------------|-------------------|
| 121 | anabaenopeptin SA1 | F       | <i>Nostoc calcicola</i>       | 10.1038/srep32958 |
| 122 | anabaenopeptin SA2 | F       | <i>Planktothrix rubescens</i> | 10.1038/srep32958 |
| 123 | anabaenopeptin SA3 | F       | <i>Planktothrix rubescens</i> | 10.1038/srep32958 |
| 124 | anabaenopeptin SA4 | F       | <i>Nostoc insulare</i>        | 10.1038/srep32958 |
| 125 | anabaenopeptin SA5 | F       | <i>Nostoc insulare</i>        | 10.1038/srep32958 |
| 126 | anabaenopeptin SA6 | F       | <i>Nostoc</i> sp.             | 10.1038/srep32958 |

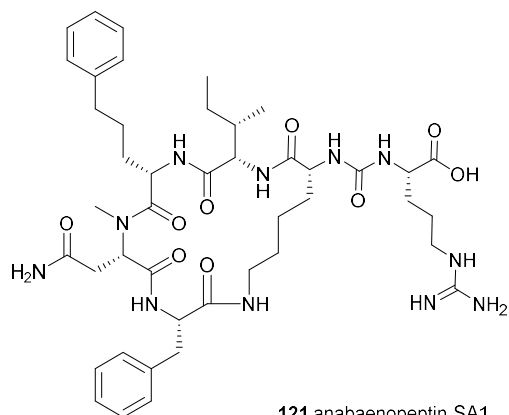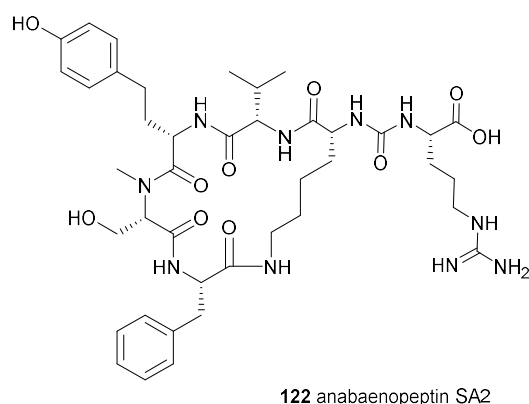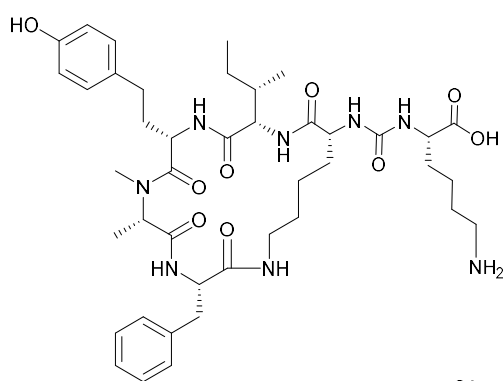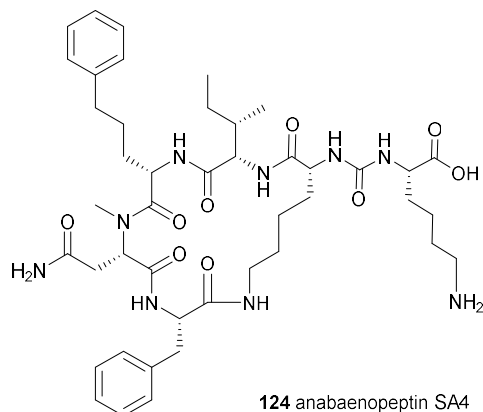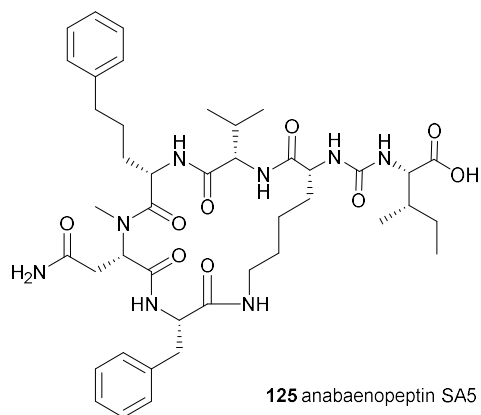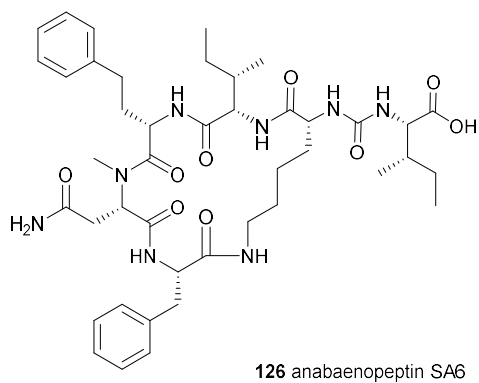

Table S1. (continued)

| #   | Compound            | Habitat | Producing organism      | DOI               |
|-----|---------------------|---------|-------------------------|-------------------|
| 127 | anabaenopeptin SA7  | F       | <i>Nostoc calcicola</i> | 10.1038/srep32958 |
| 128 | anabaenopeptin SA8  | F       | <i>Nostoc calcicola</i> | 10.1038/srep32958 |
| 129 | anabaenopeptin SA9  | F       | <i>Nostoc</i> sp.       | 10.1038/srep32958 |
| 130 | anabaenopeptin SA10 | F       | <i>Nostoc</i> sp.       | 10.1038/srep32958 |
| 131 | anabaenopeptin SA11 | F       | <i>Nostoc</i> sp.       | 10.1038/srep32958 |
| 132 | anabaenopeptin SA12 | F       | <i>Nostoc</i> sp.       | 10.1038/srep32958 |

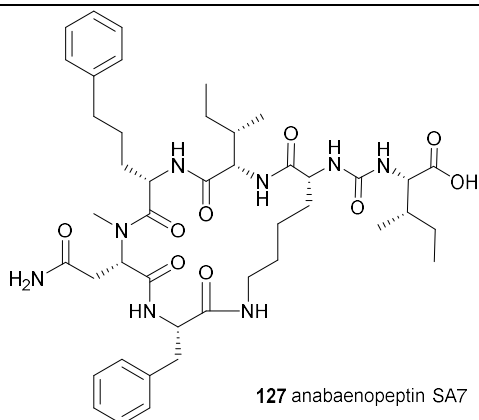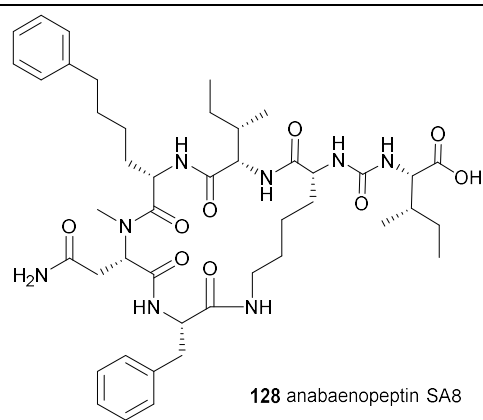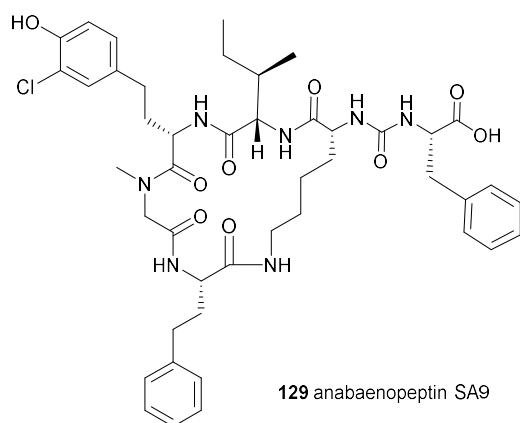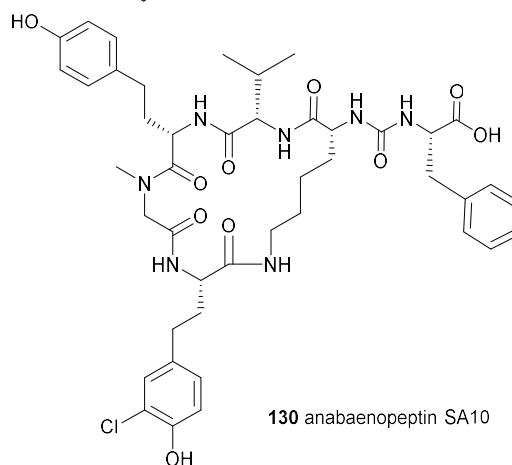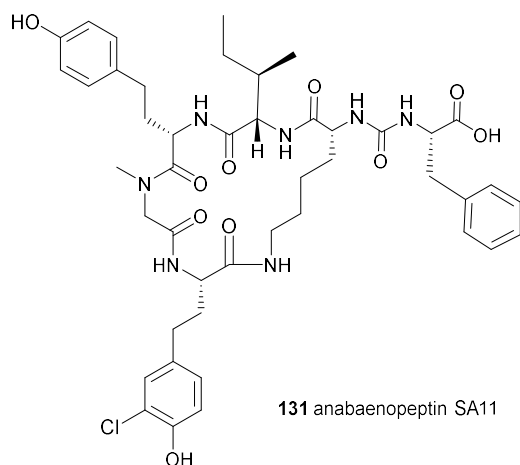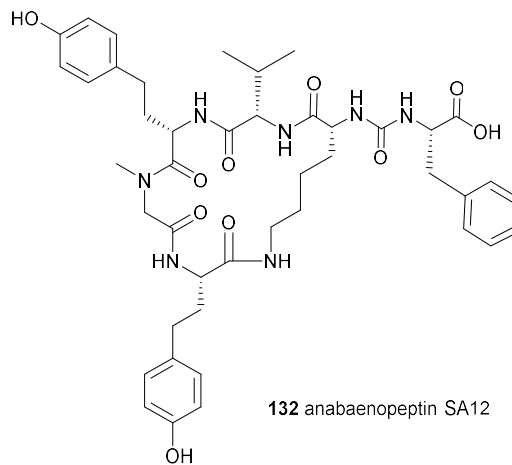

Table S1. (continued)

| #   | Compound            | Habitat | Producing organism            | DOI                       |
|-----|---------------------|---------|-------------------------------|---------------------------|
| 133 | anabaenopeptin SA13 | F       | <i>Planktothrix rubescens</i> | 10.1038/srep32958         |
| 134 | micropeptin MM836   | F       | <i>Microcystis</i> sp.        | 10.1016/j.tet.2010.09.067 |
| 135 | micropeptin MM850   | F       | <i>Microcystis</i> sp.        | 10.1016/j.tet.2010.09.067 |
| 136 | micropeptin MM916   | F       | <i>Microcystis</i> sp.        | 10.1016/j.tet.2010.09.067 |
| 137 | micropeptin MM932   | F       | <i>Microcystis</i> sp.        | 10.1016/j.tet.2010.09.067 |
| 138 | micropeptin MM978   | F       | <i>Microcystis</i> sp.        | 10.1016/j.tet.2010.09.067 |
| 139 | micropeptin MZ845   | F       | <i>Microcystis</i> sp.        | 10.1021/np900546u         |
| 140 | micropeptin MZ859   | F       | <i>Microcystis</i> sp.        | 10.1021/np900546u         |
| 141 | micropeptin MZ939A  | F       | <i>Microcystis</i> sp.        | 10.1021/np900546u         |
| 142 | micropeptin MZ925   | F       | <i>Microcystis</i> sp.        | 10.1021/np900546u         |
| 143 | micropeptin MZ939B  | F       | <i>Microcystis</i> sp.        | 10.1021/np900546u         |
| 144 | micropeptin MZ1019  | F       | <i>Microcystis</i> sp.        | 10.1021/np900546u         |
| 145 | micropeptin MZ771   | F       | <i>Microcystis</i> sp.        | 10.1021/np900546u         |

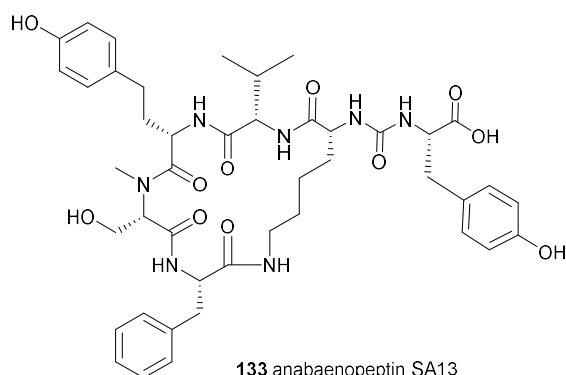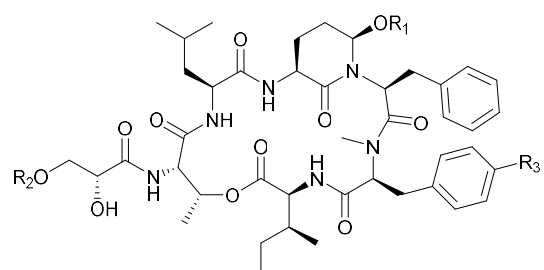

|                              |                |                 |                |                              |                |    |
|------------------------------|----------------|-----------------|----------------|------------------------------|----------------|----|
| <b>134</b> micropeptin MM836 | R <sub>1</sub> | H               | R <sub>2</sub> | H                            | R <sub>3</sub> | H  |
| <b>135</b> micropeptin MM850 | R <sub>1</sub> | CH <sub>3</sub> | R <sub>2</sub> | H                            | R <sub>3</sub> | H  |
| <b>136</b> micropeptin MM916 | R <sub>1</sub> | H               | R <sub>2</sub> | SO <sub>3</sub> <sup>-</sup> | R <sub>3</sub> | H  |
| <b>137</b> micropeptin MM932 | R <sub>1</sub> | H               | R <sub>2</sub> | SO <sub>3</sub> <sup>-</sup> | R <sub>3</sub> | OH |

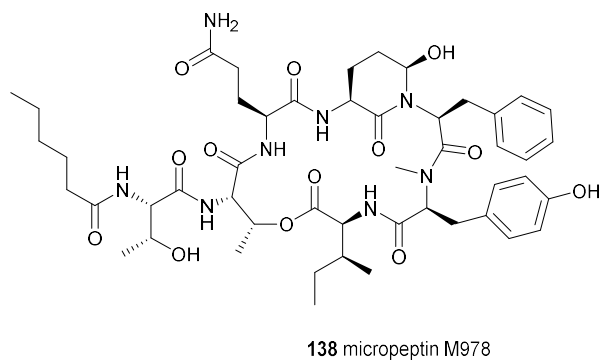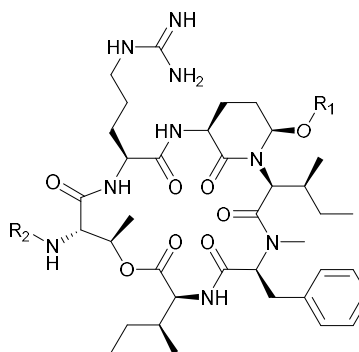

|                               |                |    |                |   |
|-------------------------------|----------------|----|----------------|---|
| <b>139</b> micropeptin MZ845  | R <sub>1</sub> | H  | R <sub>2</sub> | W |
| <b>140</b> micropeptin MZ859  | R <sub>1</sub> | Me | R <sub>2</sub> | W |
| <b>141</b> micropeptin MZ939A | R <sub>1</sub> | Me | R <sub>2</sub> | X |
| <b>142</b> micropeptin MZ925  | R <sub>1</sub> | H  | R <sub>2</sub> | Y |
| <b>143</b> micropeptin MZ939B | R <sub>1</sub> | Me | R <sub>2</sub> | Y |
| <b>144</b> micropeptin MZ1019 | R <sub>1</sub> | Me | R <sub>2</sub> | Z |
| <b>145</b> micropeptin MZ771  | R <sub>1</sub> | Me | R <sub>2</sub> | H |

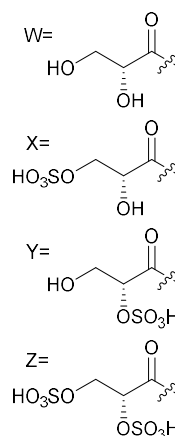

Table S1. (continued)

| #   | Compound           | Habitat | Producing organism            | DOI                       |
|-----|--------------------|---------|-------------------------------|---------------------------|
| 146 | micropeptin DR1056 | F       | <i>Microcystis aeruginosa</i> | 10.1016/j.tet.2010.06.071 |
| 147 | micropeptin DR1060 | F       | <i>Microcystis aeruginosa</i> | 10.1016/j.tet.2010.06.071 |
| 148 | micropeptin DR1006 | F       | <i>Microcystis aeruginosa</i> | 10.1016/j.tet.2010.06.071 |
| 149 | micropeptin GH979  | F       | <i>Microcystis</i> sp.        | 10.1016/j.tet.2011.04.042 |
| 150 | micropeptin HM978  | F       | <i>Microcystis</i> sp.        | 10.1016/j.tet.2011.04.042 |
| 151 | micropeptin HA983  | F       | <i>Microcystis</i> sp.        | 10.1016/j.tet.2011.04.042 |
| 152 | micropeptin KT1042 | F       | <i>Microcystis aeruginosa</i> | 10.1021/np200909x         |

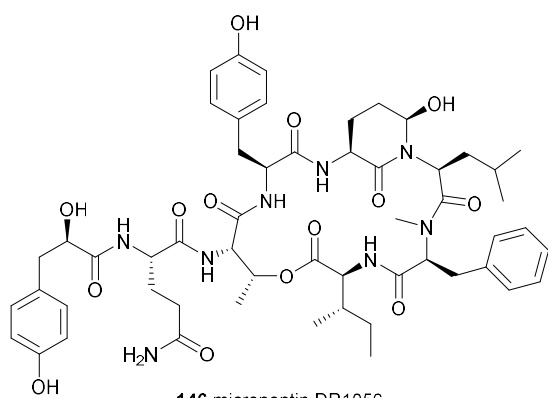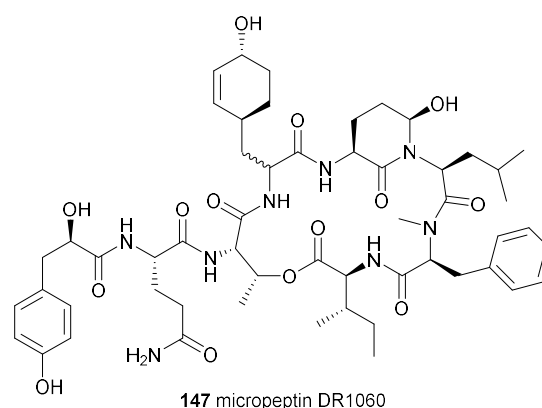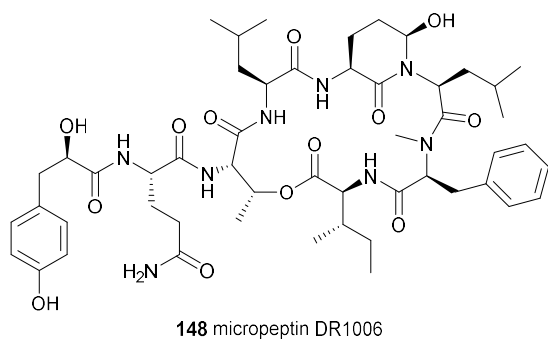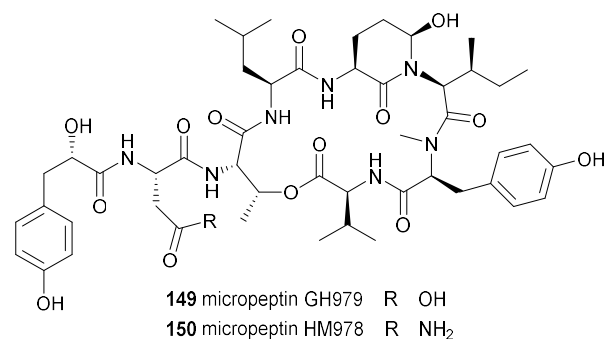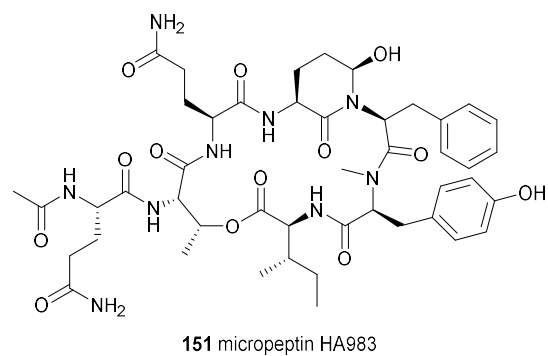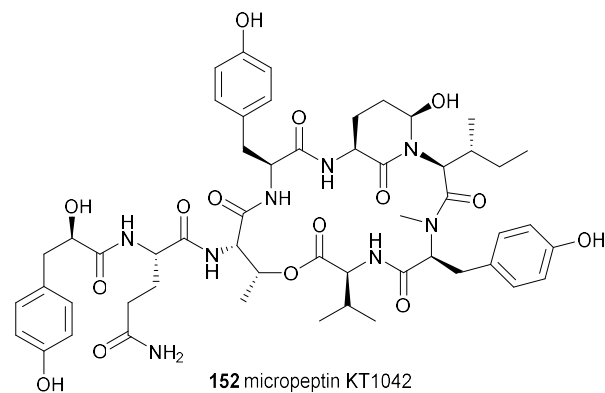



Table S1. (continued)

| #   | Compound           | Habitat | Producing organism      | DOI                       |
|-----|--------------------|---------|-------------------------|---------------------------|
| 153 | micropeptin LH920  | F       | <i>Microcystis</i> spp. | 10.1016/j.tet.2013.09.054 |
| 154 | micropeptin LH1021 | F       | <i>Microcystis</i> spp. | 10.1016/j.tet.2013.09.054 |
| 155 | micropeptin LH1048 | F       | <i>Microcystis</i> spp. | 10.1016/j.tet.2013.09.054 |
| 156 | micropeptin LH1062 | F       | <i>Microcystis</i> spp. | 10.1016/j.tet.2013.09.054 |
| 157 | micropeptin LH911A | F       | <i>Microcystis</i> spp. | 10.1016/j.tet.2013.09.054 |
| 158 | micropeptin LH911B | F       | <i>Microcystis</i> spp. | 10.1016/j.tet.2013.09.054 |
| 169 | micropeptin LH911C | F       | <i>Microcystis</i> spp. | 10.1016/j.tet.2013.09.054 |
| 160 | micropeptin LH925  | F       | <i>Microcystis</i> spp. | 10.1016/j.tet.2013.09.054 |

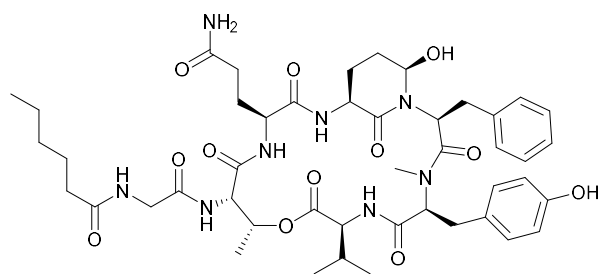

153 micropeptin LH920

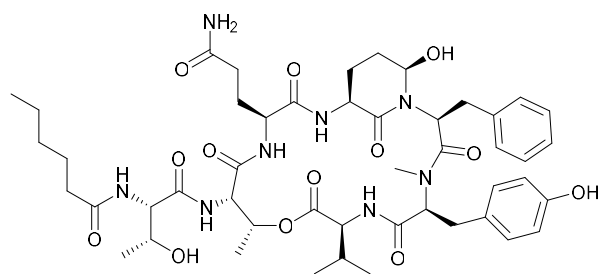

154 micropeptin LH1021

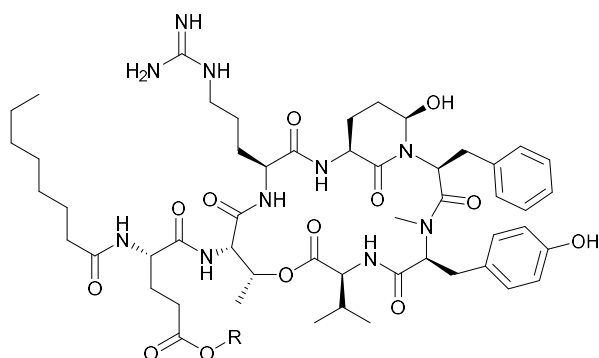

155 micropeptin LH1048 R H

156 micropeptin LH1062 R CH<sub>3</sub>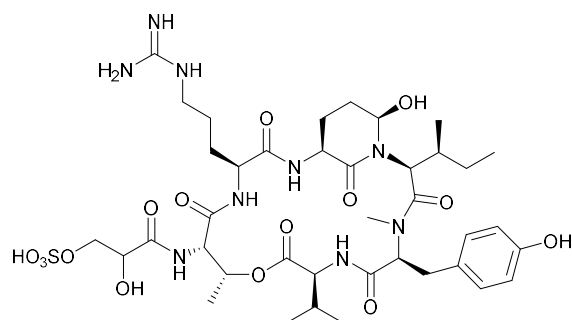

157 micropeptin LH911A

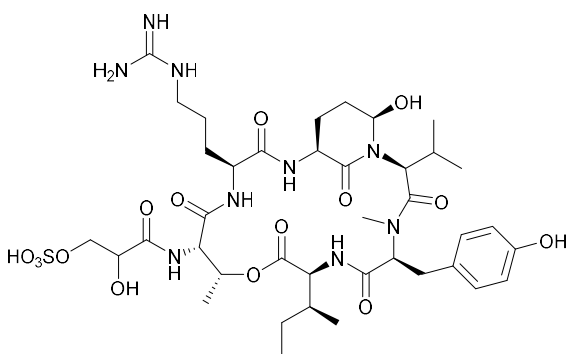

158 micropeptin LH911B

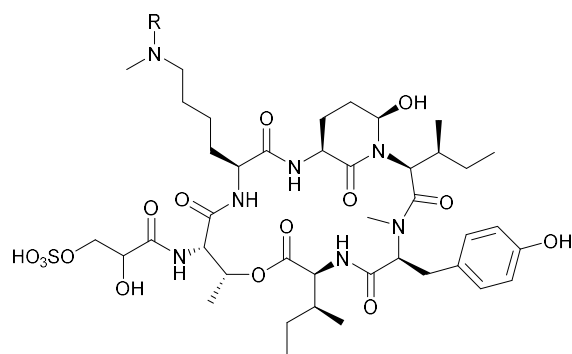

159 micropeptin LH911C R H

160 micropeptin LH925 R CH<sub>3</sub>

Table S1. (continued)

| #   | Compound           | Habitat | Producing organism            | DOI                       |
|-----|--------------------|---------|-------------------------------|---------------------------|
| 161 | micropeptin HH978  | F       | <i>Microcystis aeruginosa</i> | 10.1021/np400281q         |
| 162 | micropeptin HH960  | F       | <i>Microcystis aeruginosa</i> | 10.1021/np400281q         |
| 163 | micropeptin HH992  | F       | <i>Microcystis aeruginosa</i> | 10.1021/np400281q         |
| 164 | micropeptin 1106   | F       | <i>Microcystis aeruginosa</i> | 10.1016/j.hal.2013.09.010 |
| 165 | micropeptin 1120   | F       | <i>Microcystis aeruginosa</i> | 10.1016/j.hal.2013.09.010 |
| 166 | micropeptin KR1030 | F       | <i>Microcystis</i> sp.        | 10.1016/j.tet.2013.12.009 |
| 167 | micropeptin KR1002 | F       | <i>Microcystis</i> sp.        | 10.1016/j.tet.2013.12.009 |
| 168 | micropeptin KR998  | F       | <i>Microcystis</i> sp.        | 10.1016/j.tet.2013.12.009 |

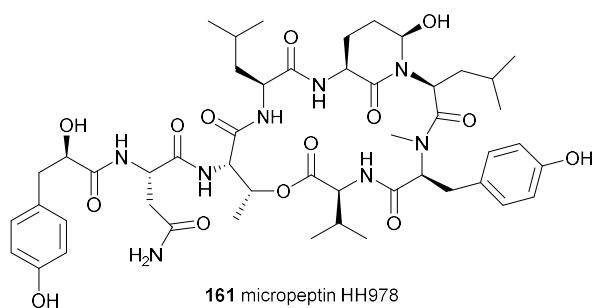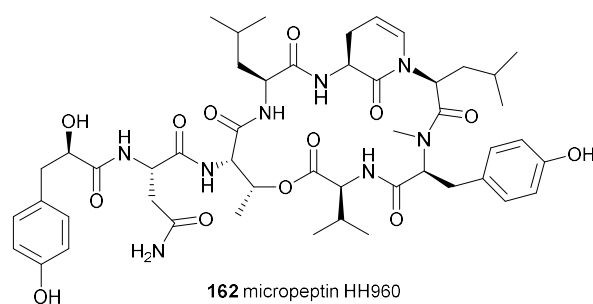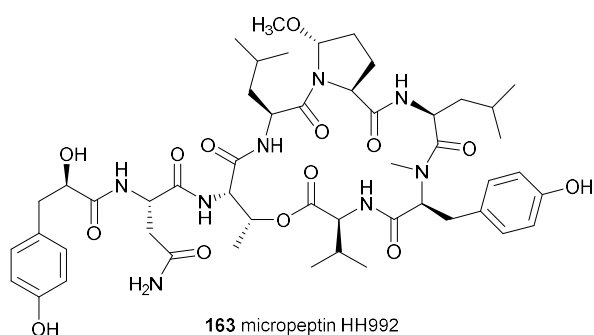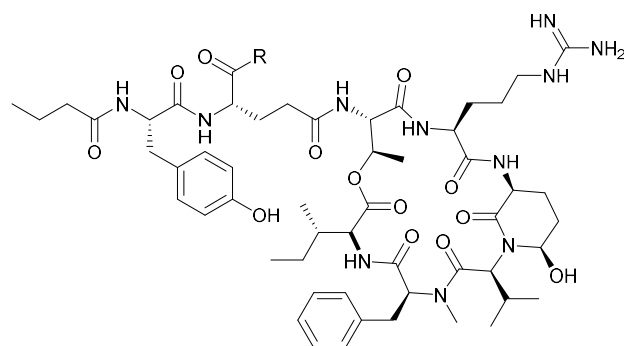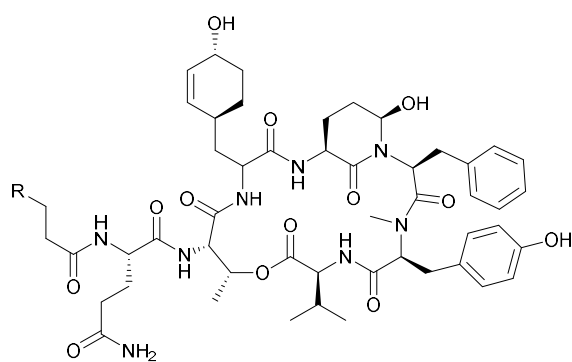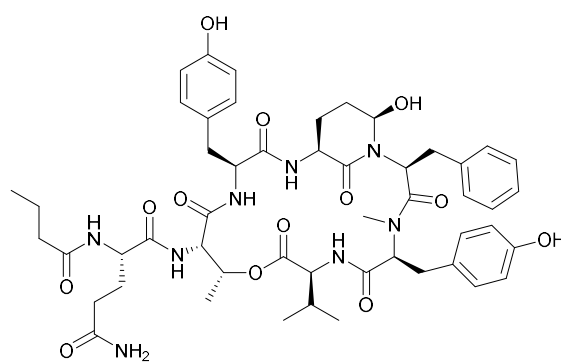

Table S1. (continued)

| #   | Compound           | Habitat | Producing organism      | DOI                |
|-----|--------------------|---------|-------------------------|--------------------|
| 169 | micropeptin KB928  | F       | <i>Microcystis</i> spp. | 10.3390/md13042347 |
| 170 | micropeptin KB956  | F       | <i>Microcystis</i> spp. | 10.3390/md13042347 |
| 171 | micropeptin KB970A | F       | <i>Microcystis</i> spp. | 10.3390/md13042347 |
| 172 | micropeptin KB970B | F       | <i>Microcystis</i> spp. | 10.3390/md13042347 |
| 173 | micropeptin KB984  | F       | <i>Microcystis</i> spp. | 10.3390/md13042347 |
| 174 | micropeptin KB970C | F       | <i>Microcystis</i> spp. | 10.3390/md13042347 |
| 175 | micropeptin KB1048 | F       | <i>Microcystis</i> spp. | 10.3390/md13042347 |
| 176 | micropeptin KB992  | F       | <i>Microcystis</i> spp. | 10.3390/md13042347 |
| 177 | micropeptin KB1046 | F       | <i>Microcystis</i> spp. | 10.3390/md13042347 |

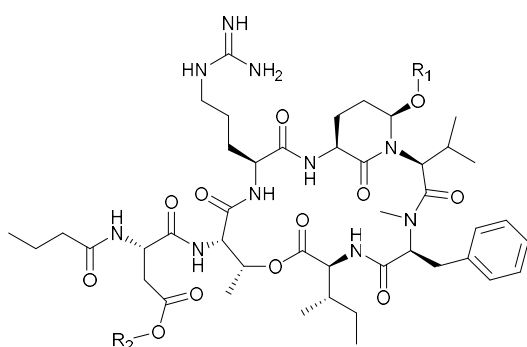

169 micropeptin KB928 R<sub>1</sub> H R<sub>2</sub> H  
 170 micropeptin KB956 R<sub>1</sub> CH<sub>3</sub> R<sub>2</sub> CH<sub>3</sub>

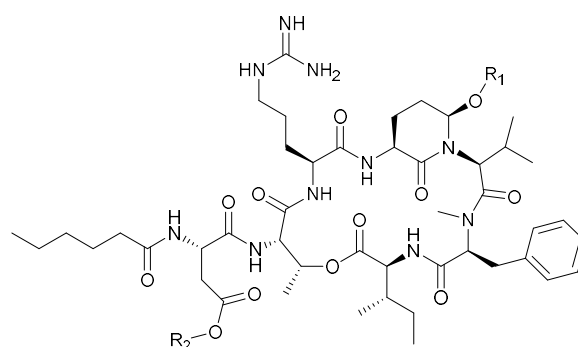

171 micropeptin KB970A R<sub>1</sub> H R<sub>2</sub> CH<sub>3</sub>  
 172 micropeptin KB970B R<sub>1</sub> CH<sub>3</sub> R<sub>2</sub> H  
 173 micropeptin KB984 R<sub>1</sub> CH<sub>3</sub> R<sub>2</sub> CH<sub>3</sub>

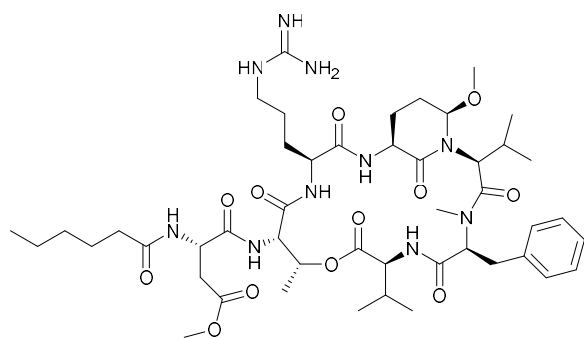

174 micropeptin KB970C

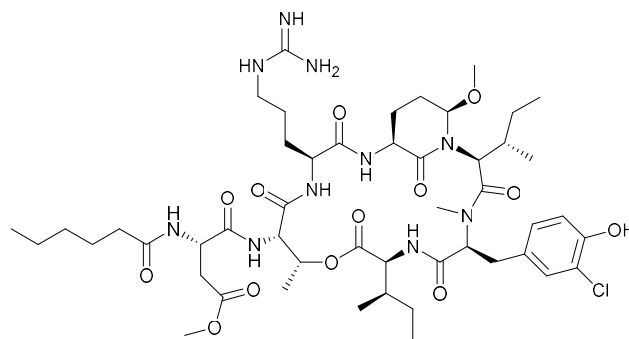

175 micropeptin KB1048

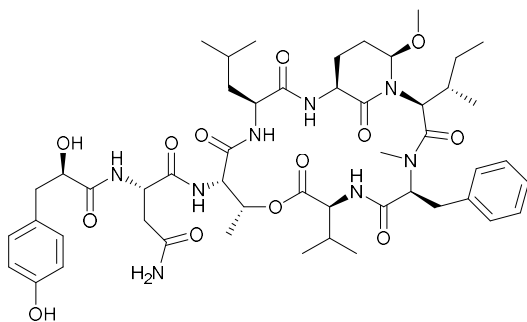

176 micropeptin KB992

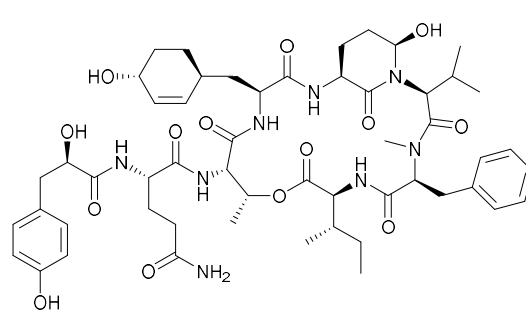

177 micropeptin KB1046

Table S1. (continued)

| #   | Compound           | Habitat | Producing organism            | DOI                          |
|-----|--------------------|---------|-------------------------------|------------------------------|
| 178 | micropeptin TR1058 | F       | <i>Microcystis</i> sp.        | 10.3390/md15120371           |
| 179 | micropeptin 996    | F       | <i>Microcystis aeruginosa</i> | 10.1016/j.tetlet.2018.01.087 |
| 180 | micropeptin 982    | F       | assemblage                    | 10.1021/acsomega.1c02025     |
| 181 | micropeptin 957    | F       | assemblage                    | 10.1021/acsomega.1c02025     |

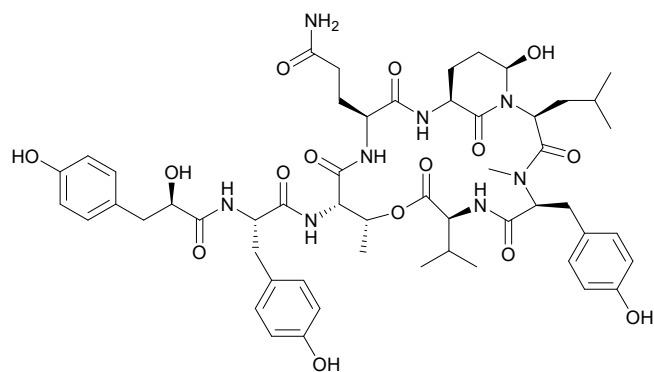

178 micropeptin TR1058

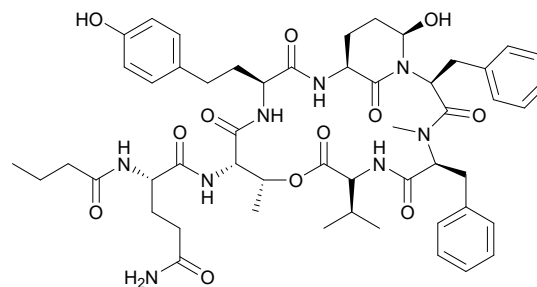

179 micropeptin 996

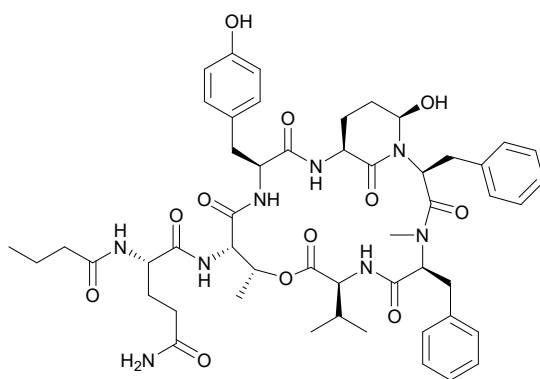

180 micropeptin 982

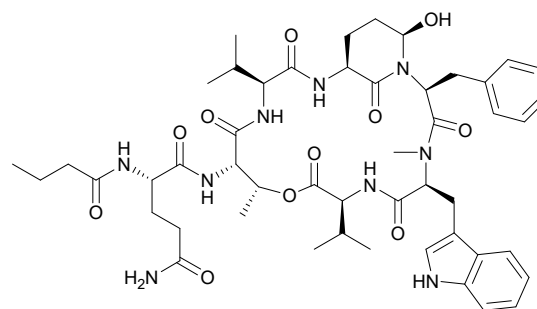

181 micropeptin 957

Table S1. (continued)

| #   | Compound             | Habitat | Producing organism             | DOI                           |
|-----|----------------------|---------|--------------------------------|-------------------------------|
| 182 | cyanopeptolin 1020   | F       | <i>Microcystis aeruginosa</i>  | 10.1021/np900818c             |
| 183 | cyanopeptolin 1081   | F       | <i>Woronichinia naegeliana</i> | 10.1080/09670262.2020.1813809 |
| 184 | cyanopeptolin CP1048 | M       | <i>Nostoc edaphicum</i>        | 10.3390/md16070220            |
| 185 | cyanopeptolin CP1006 | M       | <i>Nostoc edaphicum</i>        | 10.3390/md16070220            |

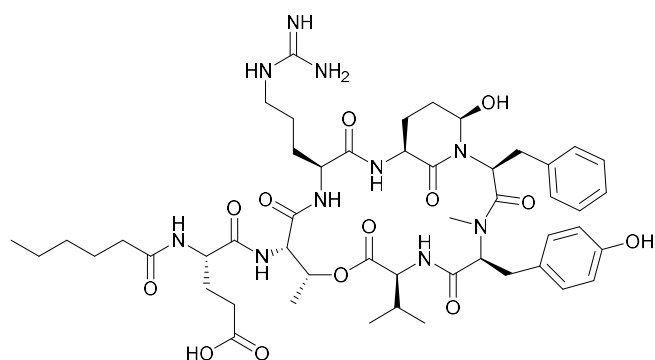

182 cyanopeptolin 1020

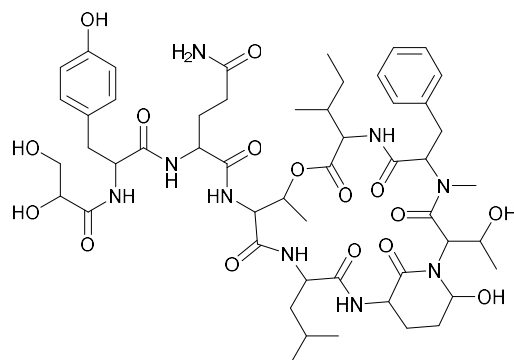

183 cyanopeptolin 1081

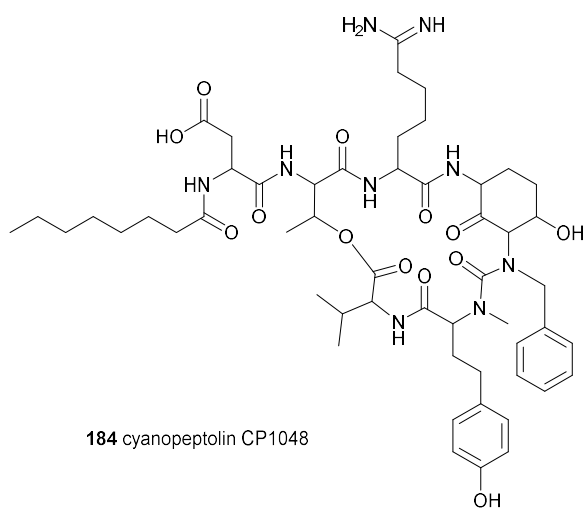

184 cyanopeptolin CP1048

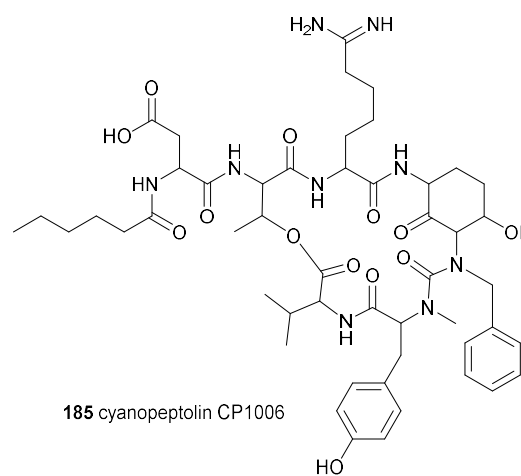

185 cyanopeptolin CP1006

Table S1. (continued)

| #   | Compound             | Habitat | Producing organism      | DOI                |
|-----|----------------------|---------|-------------------------|--------------------|
| 186 | cyanopeptolin CP1020 | M       | <i>Nostoc edaphicum</i> | 10.3390/md16070220 |
| 187 | cyanopeptolin CP1018 | M       | <i>Nostoc edaphicum</i> | 10.3390/md16070220 |
| 188 | cyanopeptolin CP992  | M       | <i>Nostoc edaphicum</i> | 10.3390/md16070220 |
| 189 | cyanopeptolin CP990  | M       | <i>Nostoc edaphicum</i> | 10.3390/md16070220 |

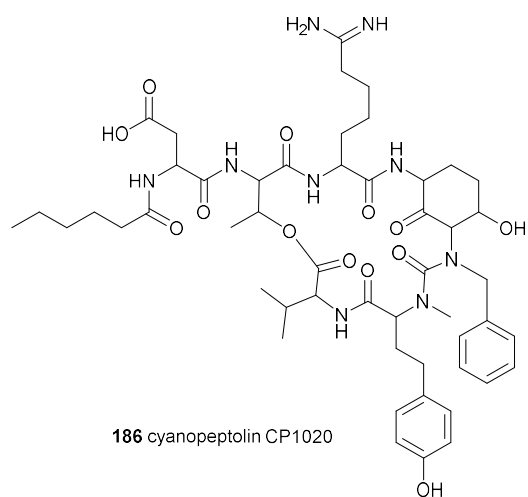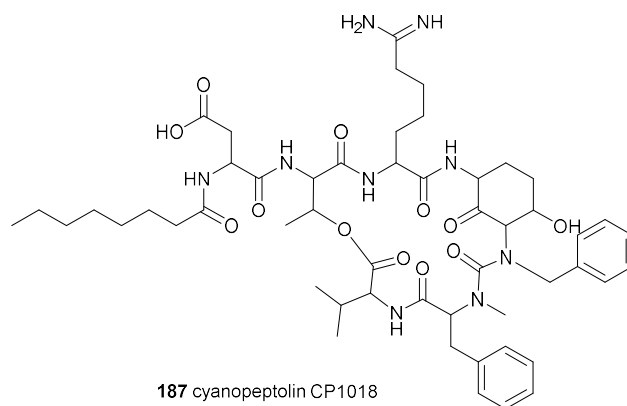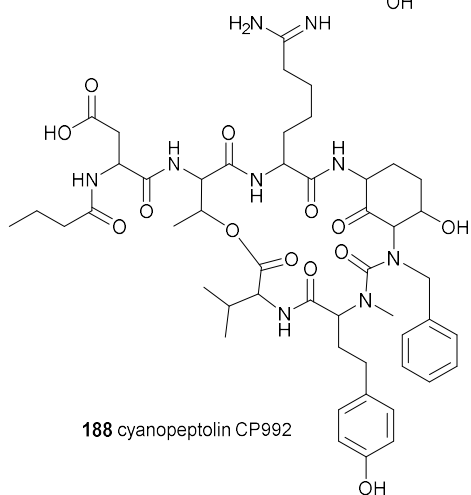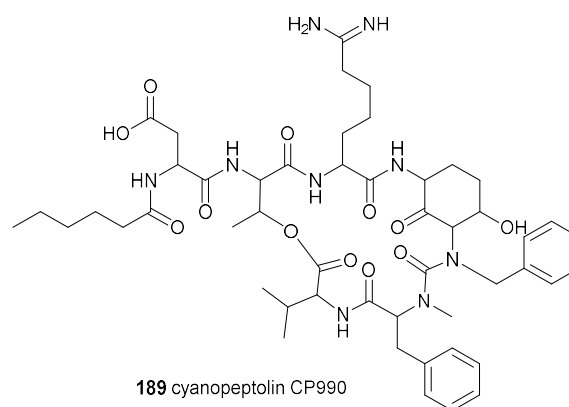

Table S1. (continued)

| #   | Compound             | Habitat | Producing organism      | DOI                |
|-----|----------------------|---------|-------------------------|--------------------|
| 190 | cyanopeptolin CP978  | M       | <i>Nostoc edaphicum</i> | 10.3390/md16070220 |
| 191 | cyanopeptolin CP1027 | M       | <i>Nostoc edaphicum</i> | 10.3390/md16070220 |
| 192 | cyanopeptolin CP1013 | M       | <i>Nostoc edaphicum</i> | 10.3390/md16070220 |
| 193 | cyanopeptolin CP999  | M       | <i>Nostoc edaphicum</i> | 10.3390/md16070220 |
| 194 | cyanopeptolin CP969  | M       | <i>Nostoc edaphicum</i> | 10.3390/md16070220 |
| 195 | cyanopeptolin CP985  | M       | <i>Nostoc edaphicum</i> | 10.3390/md16070220 |

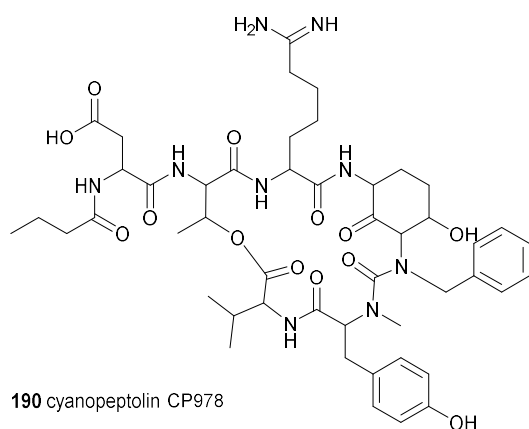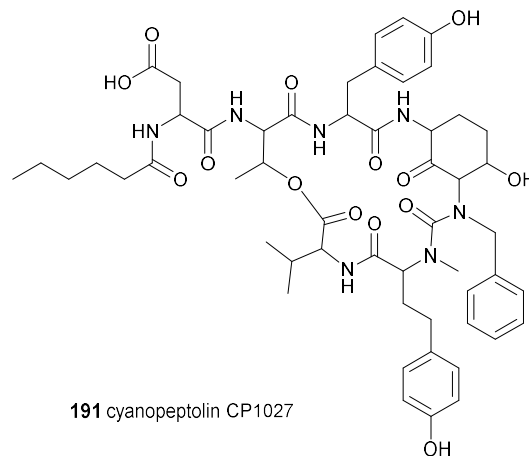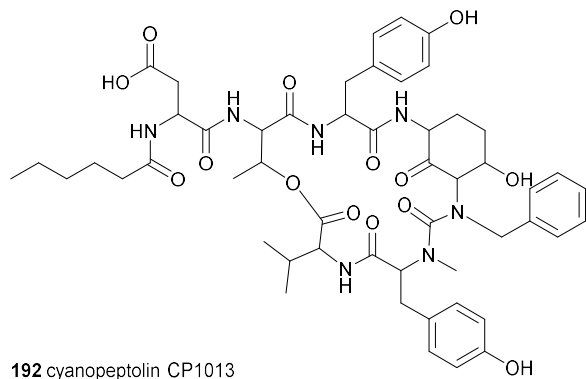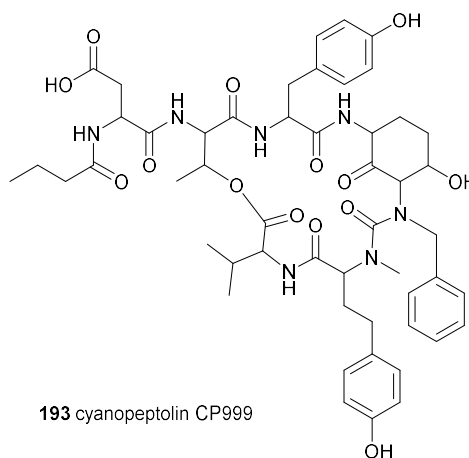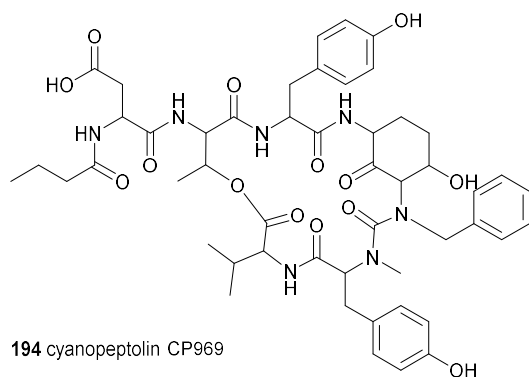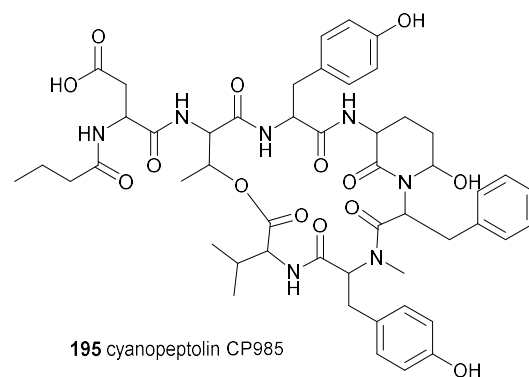

Table S1. (continued)

| #   | Compound            | Habitat | Producing organism      | DOI                |
|-----|---------------------|---------|-------------------------|--------------------|
| 196 | cyanopeptolin CP962 | M       | <i>Nostoc edaphicum</i> | 10.3390/md16070220 |
| 197 | cyanopeptolin CP941 | M       | <i>Nostoc edaphicum</i> | 10.3390/md21100508 |
| 198 | cyanopeptolin CP983 | M       | <i>Nostoc edaphicum</i> | 10.3390/md21100508 |
| 199 | cyanopeptolin CP919 | M       | <i>Nostoc edaphicum</i> | 10.3390/md21100508 |
| 200 | cyanopeptolin CP949 | M       | <i>Nostoc edaphicum</i> | 10.3390/md21100508 |
| 201 | stigonemapeptin     | F       | <i>Stigonema</i> sp.    | 10.1021/np300150h  |

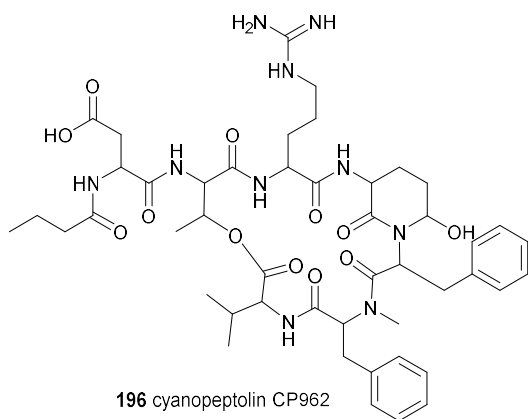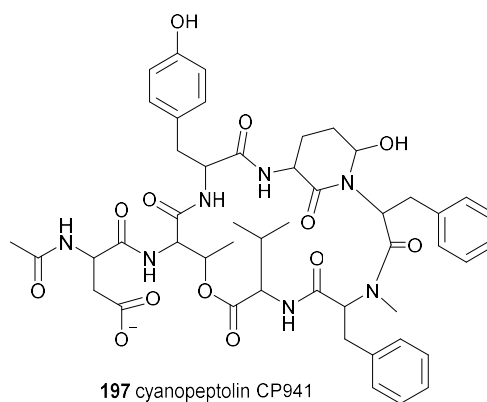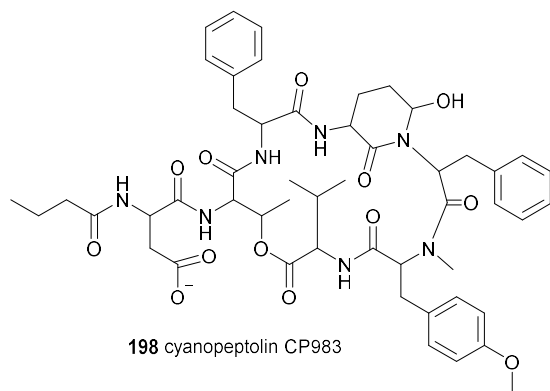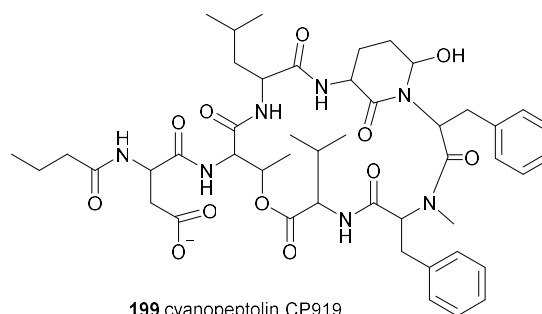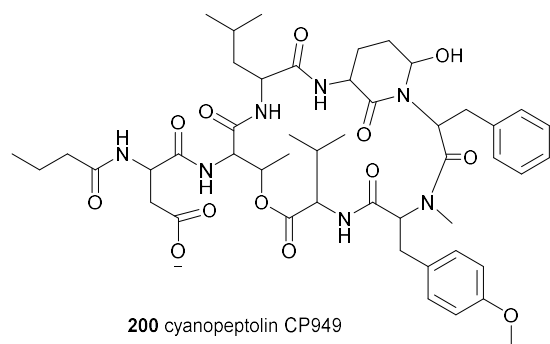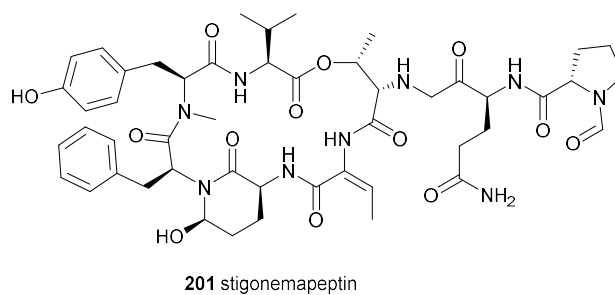



Table S1. (continued)

| #   | Compound        | Habitat | Producing organism          | DOI                          |
|-----|-----------------|---------|-----------------------------|------------------------------|
| 202 | symplostatin 5  | M       | <i>Symploca</i> sp.         | 10.1021/jm3017305            |
| 203 | symplostatin 6  | M       | <i>Symploca</i> sp.         | 10.1021/jm3017305            |
| 204 | symplostatin 7  | M       | <i>Symploca</i> sp.         | 10.1021/jm3017305            |
| 205 | symplostatin 8  | M       | <i>Symploca</i> sp.         | 10.1021/jm3017305            |
| 206 | symplostatin 9  | M       | <i>Symploca</i> sp.         | 10.1021/jm3017305            |
| 207 | symplostatin 10 | M       | <i>Symploca</i> sp.         | 10.1021/jm3017305            |
| 208 | tutuilamide A   | M       | <i>Schizothrix</i> sp.      | 10.1021/acschembio.9b00992   |
| 209 | tutuilamide B   | M       | <i>Schizothrix</i> sp.      | 10.1021/acschembio.9b00992   |
| 210 | tutuilamide C   | M       | <i>Coleofasciculus</i> sp.  | 10.1021/acschembio.9b00992   |
| 211 | bouillomide A   | M       | <i>Lyngbya bouilloni</i>    | 10.1016/j.tetlet.2010.10.062 |
| 212 | bouillomide B   | M       | <i>Lyngbya bouilloni</i>    | 10.1016/j.tetlet.2010.10.062 |
| 213 | molassamide     | M       | <i>Dichothrix utahensis</i> | 10.1021/np900603f            |

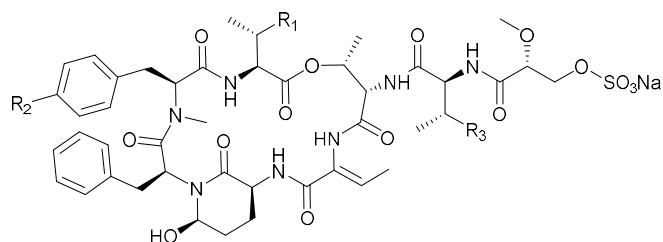

|                     |                |    |                |    |                |    |
|---------------------|----------------|----|----------------|----|----------------|----|
| 202 symplostatin 5  | R <sub>1</sub> | Et | R <sub>2</sub> | H  | R <sub>3</sub> | Me |
| 203 symplostatin 6  | R <sub>1</sub> | Me | R <sub>2</sub> | H  | R <sub>3</sub> | Me |
| 204 symplostatin 7  | R <sub>1</sub> | Et | R <sub>2</sub> | H  | R <sub>3</sub> | Et |
| 205 symplostatin 8  | R <sub>1</sub> | Et | R <sub>2</sub> | OH | R <sub>3</sub> | Me |
| 206 symplostatin 9  | R <sub>1</sub> | Me | R <sub>2</sub> | OH | R <sub>3</sub> | Me |
| 207 symplostatin 10 | R <sub>1</sub> | Et | R <sub>2</sub> | OH | R <sub>3</sub> | Et |

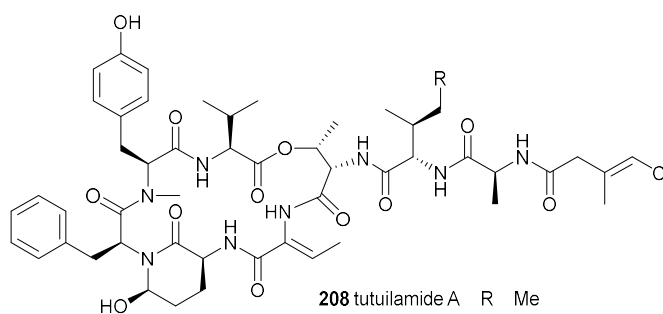

208 tutuilamide A R Me  
209 tutuilamide B R H

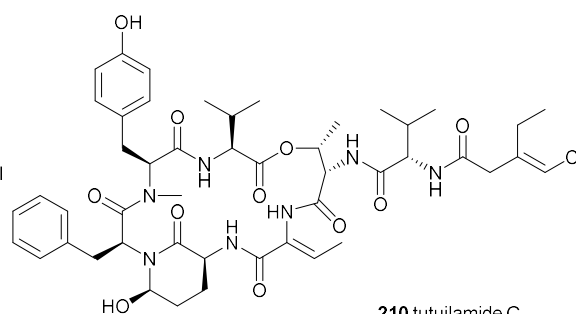

210 tutuilamide C

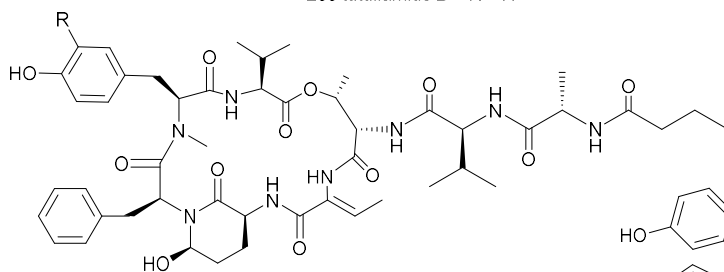

211 bouillomide A R H  
212 bouillomide B R Br

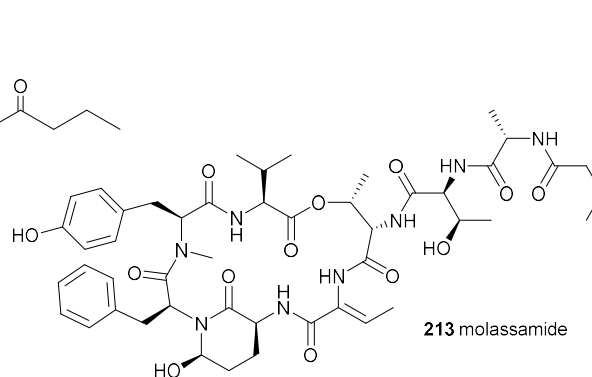

213 molassamide

Table S1. (continued)

| #   | Compound                  | Habitat | Producing organism   | DOI                          |
|-----|---------------------------|---------|----------------------|------------------------------|
| 214 | molassamide B             | M       | <i>Rivularia</i> sp. | 10.1038/s41467-022-32016-6   |
| 215 | rivulariapeptolide 1185   | M       | <i>Rivularia</i> sp. | 10.1038/s41467-022-32016-6   |
| 216 | rivulariapeptolide 1155 B | M       | <i>Rivularia</i> sp. | 10.1038/s41467-022-32016-6   |
| 217 | rivulariapeptolide 1121   | M       | <i>Rivularia</i> sp. | 10.1038/s41467-022-32016-6   |
| 218 | rivulariapeptolide 989    | M       | <i>Rivularia</i> sp. | 10.1038/s41467-022-32016-6   |
| 219 | rivulariapeptolide 1155   | M       | <i>Rivularia</i> sp. | 10.1038/s41587-020-0740-8    |
| 220 | jizanpeptin A             | M       | <i>Symploca</i> sp.  | 10.1021/acs.jnatprod.8b00117 |
| 221 | jizanpeptin B             | M       | <i>Symploca</i> sp.  | 10.1021/acs.jnatprod.8b00117 |
| 222 | jizanpeptin C             | M       | <i>Symploca</i> sp.  | 10.1021/acs.jnatprod.8b00117 |
| 223 | jizanpeptin D             | M       | <i>Symploca</i> sp.  | 10.1021/acs.jnatprod.8b00117 |

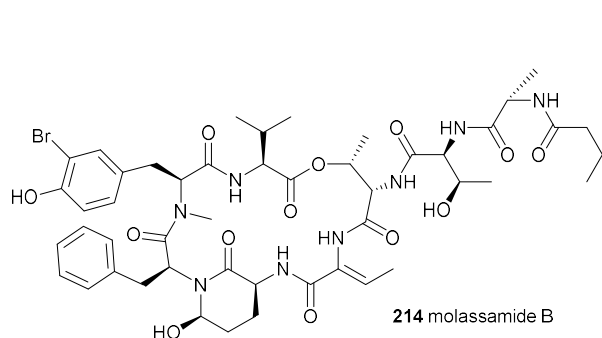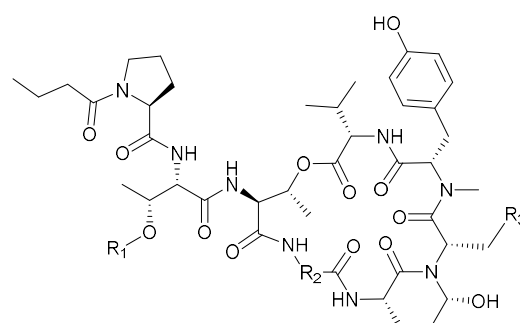

|                              |                |           |                |                          |                |     |
|------------------------------|----------------|-----------|----------------|--------------------------|----------------|-----|
| 215 rivulariapeptolide 1185  | R <sub>1</sub> | N-Ba-Pro- | R <sub>2</sub> | -CH-CH <sub>2</sub> -iPr | R <sub>3</sub> | Ph  |
| 216 rivulariapeptolide 1155B | R <sub>1</sub> | N-Ba-Pro- | R <sub>2</sub> | -C=CH-CH <sub>3</sub>    | R <sub>3</sub> | Ph  |
| 217 rivulariapeptolide 1121  | R <sub>1</sub> | N-Ba-Pro- | R <sub>2</sub> | -C=CH-CH <sub>3</sub>    | R <sub>3</sub> | iPh |
| 218 rivulariapeptolide 989   | R <sub>1</sub> | H         | R <sub>2</sub> | -C=CH-CH <sub>3</sub>    | R <sub>3</sub> | Ph  |

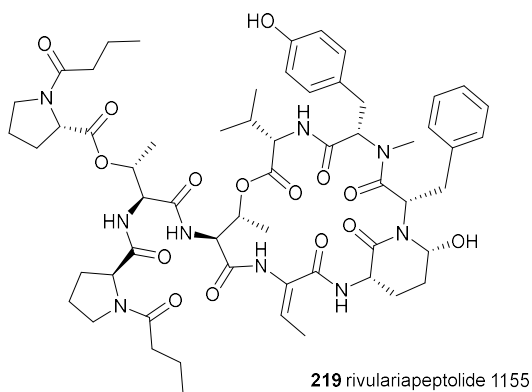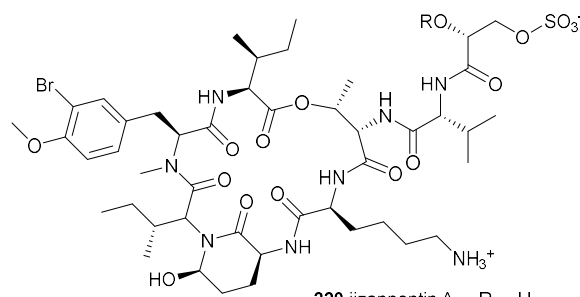

221 jizanpeptin B R CH<sub>3</sub>

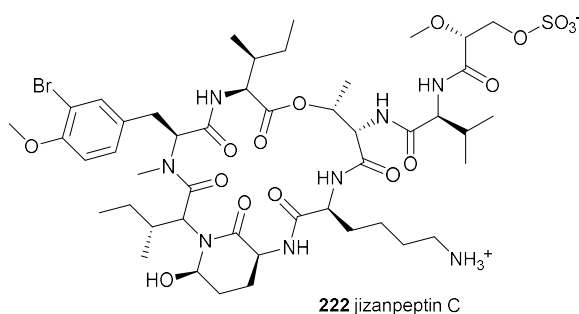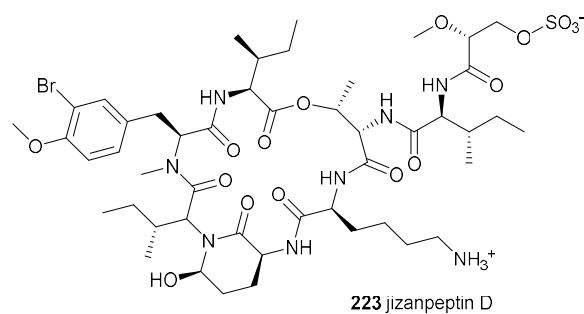

Table S1. (continued)

| #   | Compound                | Habitat | Producing organism                     | DOI                          |
|-----|-------------------------|---------|----------------------------------------|------------------------------|
| 224 | jizanpeptin E           | M       | <i>Symploca</i> sp.                    | 10.1021/acs.jnatprod.8b00117 |
| 225 | kempopeptin C           | M       | <i>Lyngbya confervoides</i>            | 10.3390/md15090290           |
| 226 | kyanamide               | M       | <i>Caldora penicillata</i>             | 10.1016/j.tet.2019.04.046    |
| 227 | largamide D oxazolidine | M       | <i>Lyngbya</i> cf. <i>confervoides</i> | 10.3390/md8061803            |
| 228 | microcystin-FA          | F       | <i>Microcystis</i> sp.                 | 10.1016/j.phytol.2013.07.011 |
| 229 | microcystin-WA          | F       | <i>Microcystis</i> sp.                 | 10.1016/j.phytol.2013.07.011 |

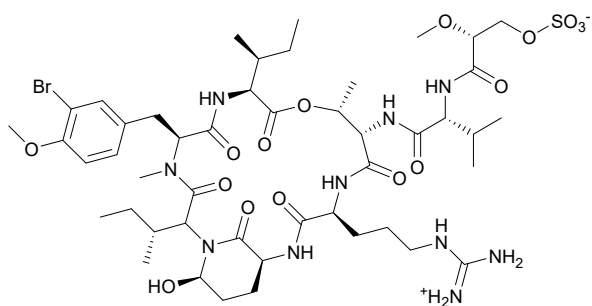

224 jizanpeptin E

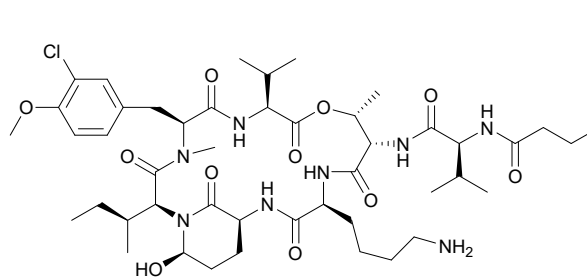

225 kempopeptin C

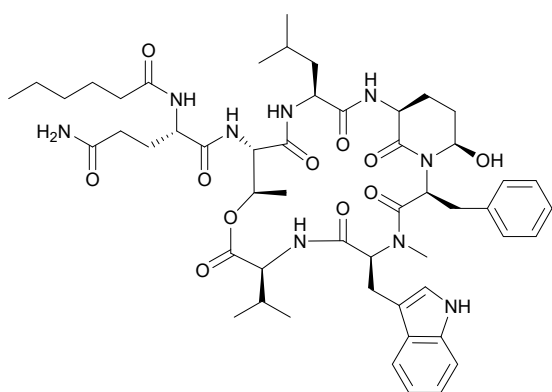

226 kyanamide

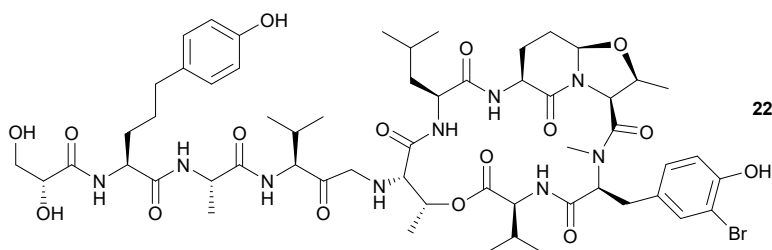

227 largamide D oxazolidine

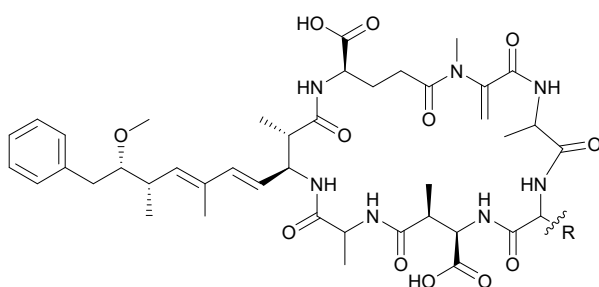

228 microcystin-FA R X  
 229 microcystin-WA R Y

Table S1. (continued)

| #   | Compound                           | Habitat | Producing organism            | DOI                |
|-----|------------------------------------|---------|-------------------------------|--------------------|
| 230 | microcystin MC-Waba                | F       | <i>Microcystis</i> sp.        | 10.3390/md11083025 |
| 231 | microcystin MC-WL                  | F       | <i>Microcystis</i> sp.        | 10.3390/md11083025 |
| 232 | [M(O)1] microcystin-LR             | F       | <i>Microcystis aeruginosa</i> | 10.1002/rcm.7098   |
| 233 | [M(O)1, Glu(OCH3)6] microcystin-LR | F       | <i>Microcystis aeruginosa</i> | 10.1002/rcm.7098   |
| 234 | [Leu1, Glu(OCH3)6] microcystin-LR  | F       | <i>Microcystis aeruginosa</i> | 10.1002/rcm.7098   |

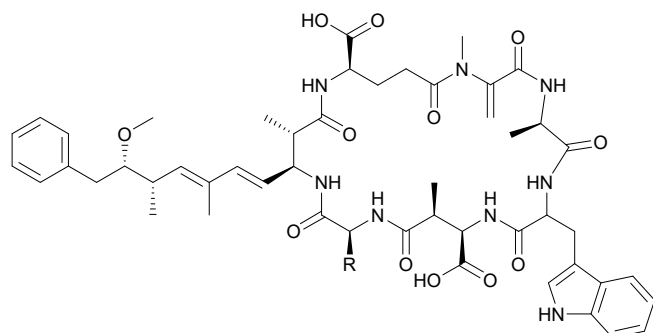

230 microcystin MC-Waba R CH<sub>2</sub>CH<sub>3</sub>  
 231 microcystin MC-WL R CH<sub>2</sub>CH(CH<sub>3</sub>)<sub>2</sub>

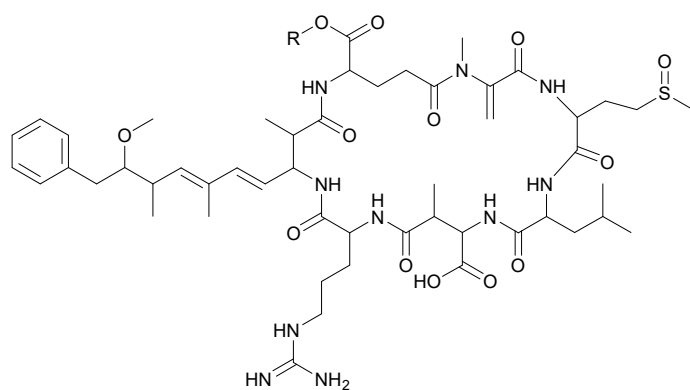

232 [M(O)1] microcystin-LR R H  
 233 [M(O)1, Glu(OCH3)6] microcystin-LR R CH<sub>3</sub>

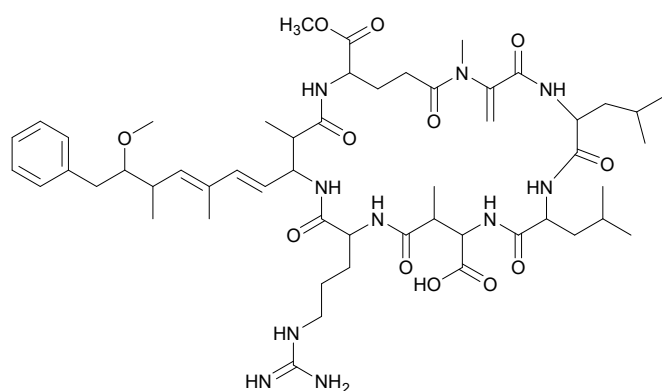

234 [Leu1, Glu(OCH3)6] microcystin-LR

Table S1. (continued)

| #   | Compound                                | Habitat | Producing organism            | DOI                          |
|-----|-----------------------------------------|---------|-------------------------------|------------------------------|
| 235 | [Leu1, Ser7] microcystin-LR             | F       | <i>Microcystis aeruginosa</i> | 10.1002/rcm.7098             |
| 236 | [Leu1, Glu(OCH3)6, Ser7] microcystin-LR | F       | <i>Microcystis aeruginosa</i> | 10.1002/rcm.7098             |
| 237 | [Leu1, Asp3] microcystin-LR             | F       | <i>Microcystis aeruginosa</i> | 10.1002/rcm.7098             |
| 238 | [Leu1, Glu(OCH3)6] microcystin-HiLR     | F       | <i>Microcystis aeruginosa</i> | 10.1002/rcm.7098             |
| 239 | [D-Glu(OCH3)6, D-Asp3] microcystin-LAba | F       | <i>Microcystis aeruginosa</i> | 10.1016/j.envpol.2010.06.018 |

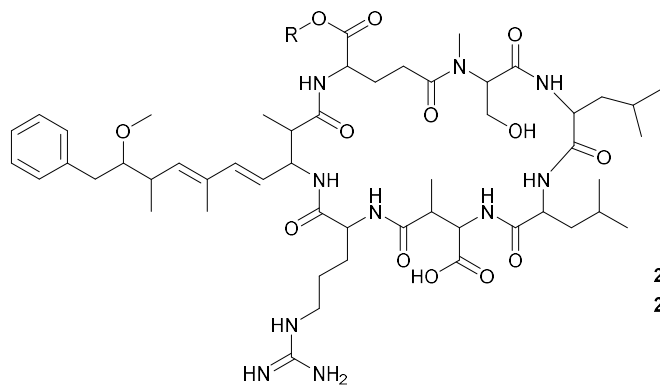

235 [Leu1, Ser7] microcystin-LR

R H

236 [Leu1, Glu(OCH3)6, Ser7] microcystin-LR

R CH<sub>3</sub>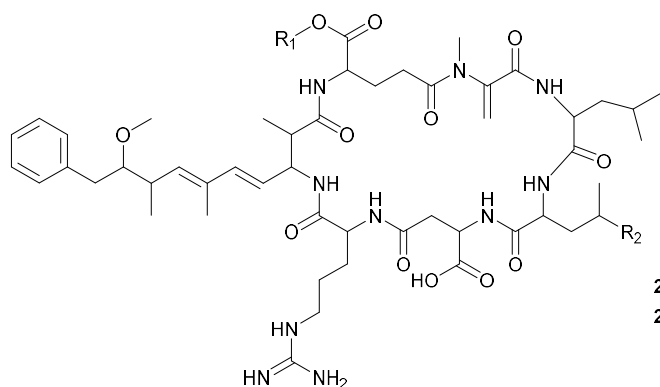

237 [Leu1, Asp3] microcystin-LR

R<sub>1</sub> H R<sub>2</sub> CH<sub>3</sub>

238 [Leu1, Glu(OCH3)6] microcystin-HiLR

R<sub>1</sub> CH<sub>3</sub> R<sub>2</sub> CH<sub>2</sub>-CH<sub>3</sub>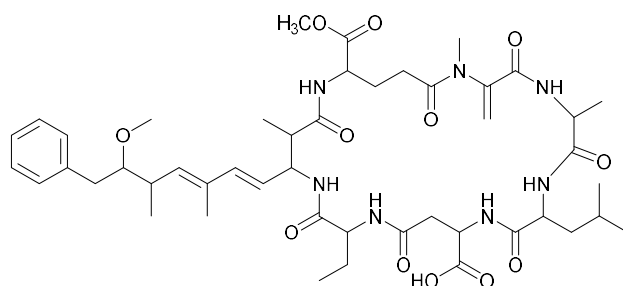

239 [D-Glu(OCH3)6, D-Asp3] microcystin-LAba

Table S1. (continued)

| #   | Compound               | Habitat | Producing organism            | DOI                          |
|-----|------------------------|---------|-------------------------------|------------------------------|
| 240 | microcystin-YL         | F       | <i>Microcystis aeruginosa</i> | 10.1016/j.envpol.2010.06.018 |
| 241 | microcystin-YM         | F       | <i>Microcystis aeruginosa</i> | 10.1016/j.envpol.2010.06.018 |
| 242 | microcystin compound 1 | F       | assemblage                    | 10.1021/acs.jnatprod.7b00986 |
| 243 | microcystin compound 2 | F       | assemblage                    | 10.1021/acs.jnatprod.7b00986 |
| 244 | microcystin compound 3 | F       | assemblage                    | 10.1021/acs.jnatprod.7b00986 |
| 245 | microcystin compound 4 | F       | assemblage                    | 10.1021/acs.jnatprod.7b00986 |

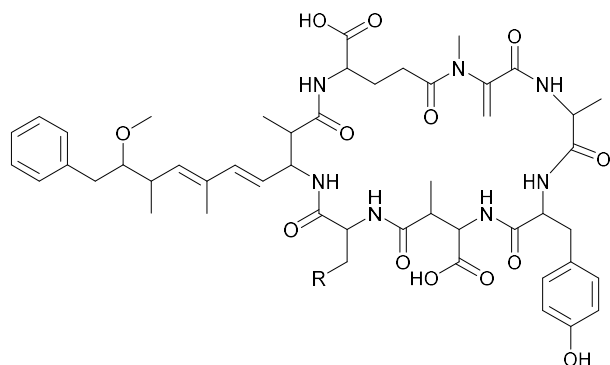

240 microcystin-YL R CH(CH<sub>3</sub>)<sub>2</sub>  
 241 microcystin-YM R CH<sub>2</sub>-S-CH<sub>3</sub>

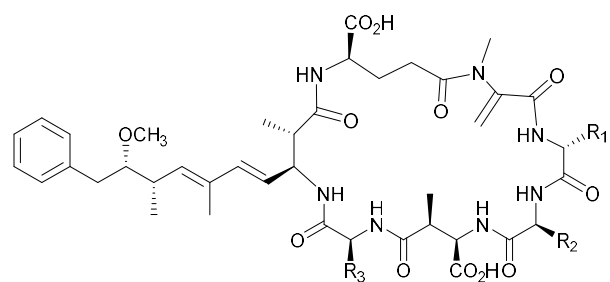

242 microcystin Compound 1 R<sub>1</sub> CH<sub>3</sub> R<sub>2</sub> A R<sub>3</sub> A  
 243 microcystin Compound 2 R<sub>1</sub> CH<sub>3</sub> R<sub>2</sub> A R<sub>3</sub> B  
 244 microcystin Compound 3 R<sub>1</sub> CH<sub>3</sub> R<sub>2</sub> D R<sub>3</sub> A  
 245 microcystin Compound 4 R<sub>1</sub> C R<sub>2</sub> C R<sub>3</sub> E

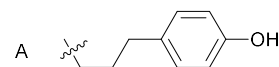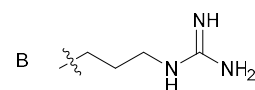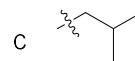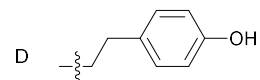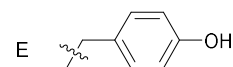

Table S1. (continued)

| #   | Compound              | Habitat | Producing organism     | DOI                          |
|-----|-----------------------|---------|------------------------|------------------------------|
| 246 | microcyclamide GL616  | F       | <i>Microcystis</i> sp. | 10.1016/j.tet.2010.02.008    |
| 247 | microcyclamide GL582  | F       | <i>Microcystis</i> sp. | 10.1016/j.tet.2010.02.008    |
| 248 | microcyclamide GL614A | F       | <i>Microcystis</i> sp. | 10.1016/j.tet.2010.02.008    |
| 249 | microcyclamide GL614B | F       | <i>Microcystis</i> sp. | 10.1016/j.tet.2010.02.008    |
| 250 | microcyclamide GL546A | F       | <i>Microcystis</i> sp. | 10.1016/j.tet.2010.02.008    |
| 251 | microcyclamide GL546B | F       | <i>Microcystis</i> sp. | 10.1016/j.tet.2010.02.008    |
| 252 | microcyclamide GL628  | F       | <i>Microcystis</i> sp. | 10.1016/j.tet.2010.02.008    |
| 253 | microcyclamide GL614C | F       | <i>Microcystis</i> sp. | 10.1016/j.tet.2010.02.008    |
| 254 | microcyclamide MZ602  | F       | <i>Microcystis</i> sp. | 10.1016/j.tetlet.2010.10.051 |

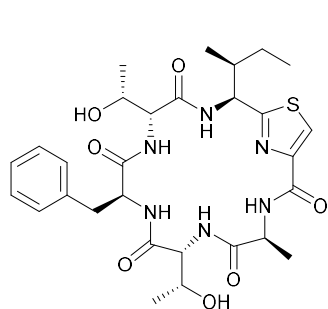

246 microcyclamide GL616

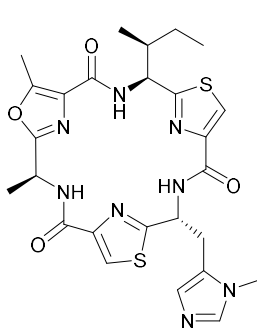

247 microcyclamide GL582

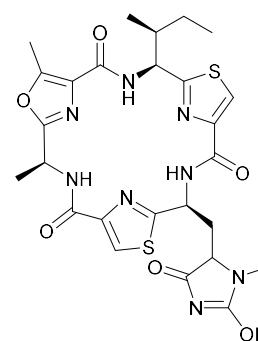

248 microcyclamide GL614A

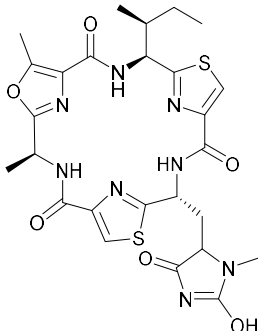

249 microcyclamide GL614B

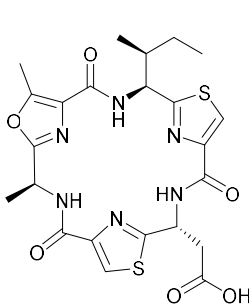

250 microcyclamide GL546A

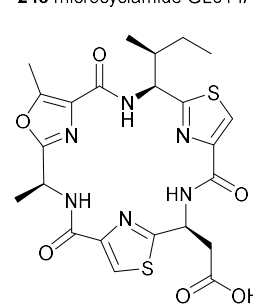

251 microcyclamide GL546B

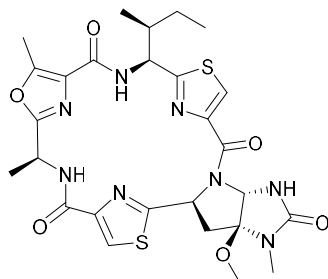

252 microcyclamide GL628

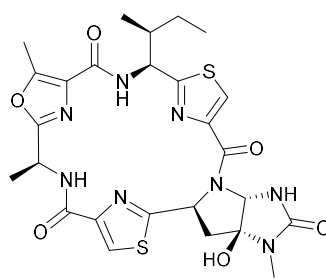

253 microcyclamide GL614C

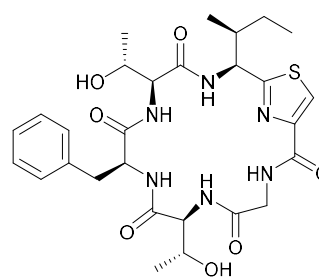

254 microcyclamide MZ602

Table S1. (continued)

| #   | Compound             | Habitat | Producing organism            | DOI                          |
|-----|----------------------|---------|-------------------------------|------------------------------|
| 255 | microcyclamide MZ568 | F       | <i>Microcystis</i> sp.        | 10.1016/j.tetlet.2010.10.051 |
| 256 | hapalocyclamide      | F       | <i>Hapalosiphon</i> sp.       | 10.1016/j.tetlet.2011.12.048 |
| 257 | balgacyclamide A     | F       | <i>Microcystis aeruginosa</i> | 10.1021/np400814w            |
| 258 | balgacyclamide B     | F       | <i>Microcystis aeruginosa</i> | 10.1021/np400814w            |
| 259 | balgacyclamide C     | F       | <i>Microcystis aeruginosa</i> | 10.1021/np400814w            |
| 260 | tolypamide           | F       | <i>Tolypothrix</i> sp.        | 10.1002/anie.202015975       |
| 261 | anacyclamide A10     | F       | <i>Anabaena</i> sp.           | 10.1128/AEM.01061-09         |
| 262 | anacyclamide B10     | F       | <i>Anabaena</i> sp.           | 10.1128/AEM.01061-09         |

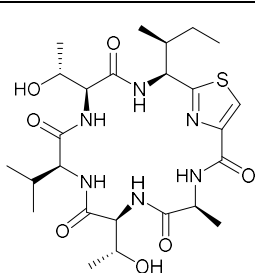

255 microcyclamide MZ568

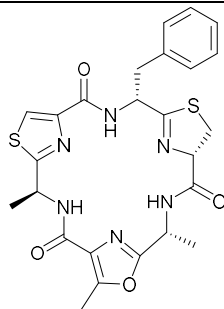

256 hapalocyclamide

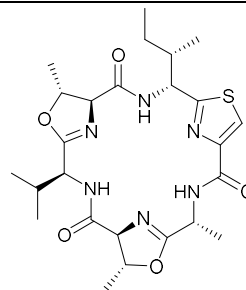

257 balgacyclamide A

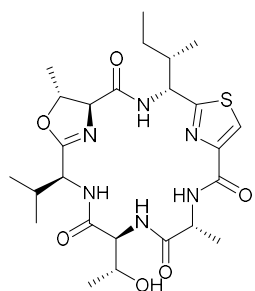

258 balgacyclamide B

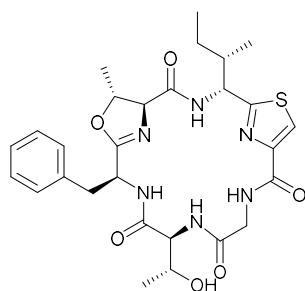

259 balgacyclamide C

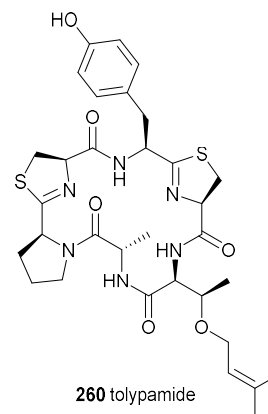

260 tolypamide

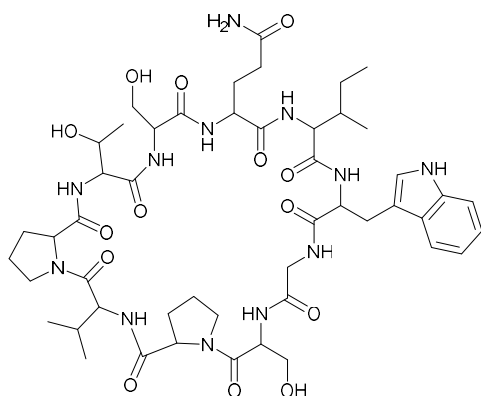

261 anacyclamide A10

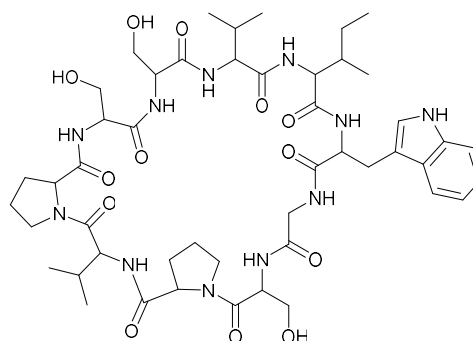

262 anacyclamide B10



Table S1. (continued)

| #   | Compound         | Habitat | Producing organism  | DOI                  |
|-----|------------------|---------|---------------------|----------------------|
| 263 | anacyclamide C10 | F       | <i>Anabaena</i> sp. | 10.1128/AEM.01061-09 |
| 264 | anacyclamide D10 | F       | <i>Anabaena</i> sp. | 10.1128/AEM.01061-09 |
| 265 | anacyclamide E10 | F       | <i>Anabaena</i> sp. | 10.1128/AEM.01061-09 |
| 266 | anacyclamide A11 | M       | <i>Anabaena</i> sp. | 10.1128/AEM.01061-09 |

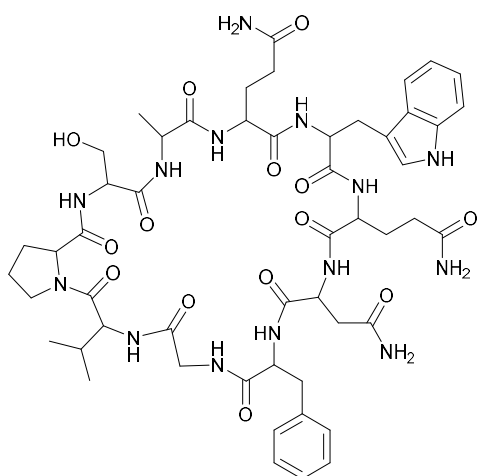

263 anacyclamide C10

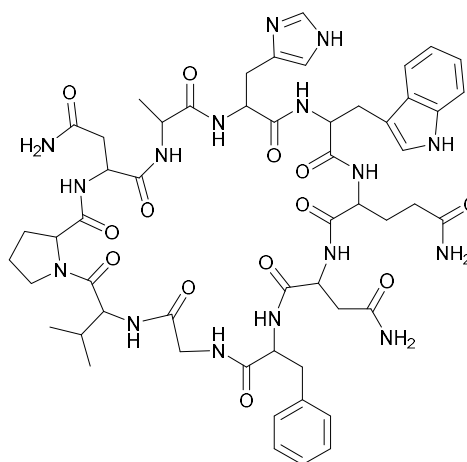

264 anacyclamide D10

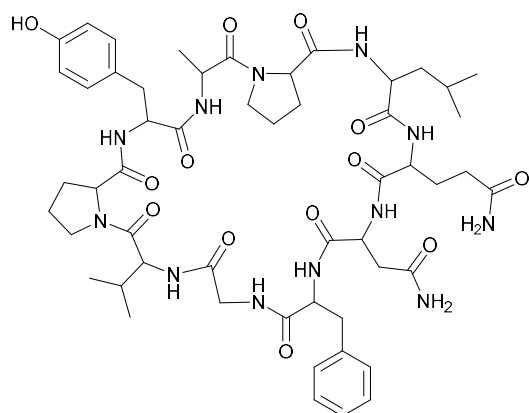

265 anacyclamide E10

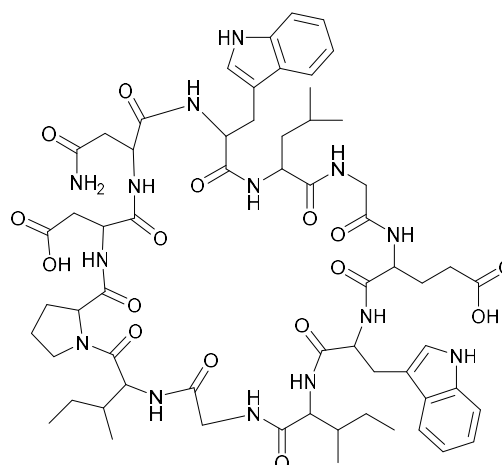

266 anacyclamide A11

Table S1. (continued)

| #   | Compound         | Habitat | Producing organism  | DOI                  |
|-----|------------------|---------|---------------------|----------------------|
| 267 | anacyclamide A15 | F       | <i>Anabaena</i> sp. | 10.1128/AEM.01061-09 |
| 268 | anacyclamide B8  | M       | <i>Anabaena</i> sp. | 10.1128/AEM.01061-09 |
| 269 | anacyclamide C8  | F       | <i>Anabaena</i> sp. | 10.1128/AEM.01061-09 |
| 270 | anacyclamide B7  | F       | <i>Anabaena</i> sp. | 10.1128/AEM.01061-09 |

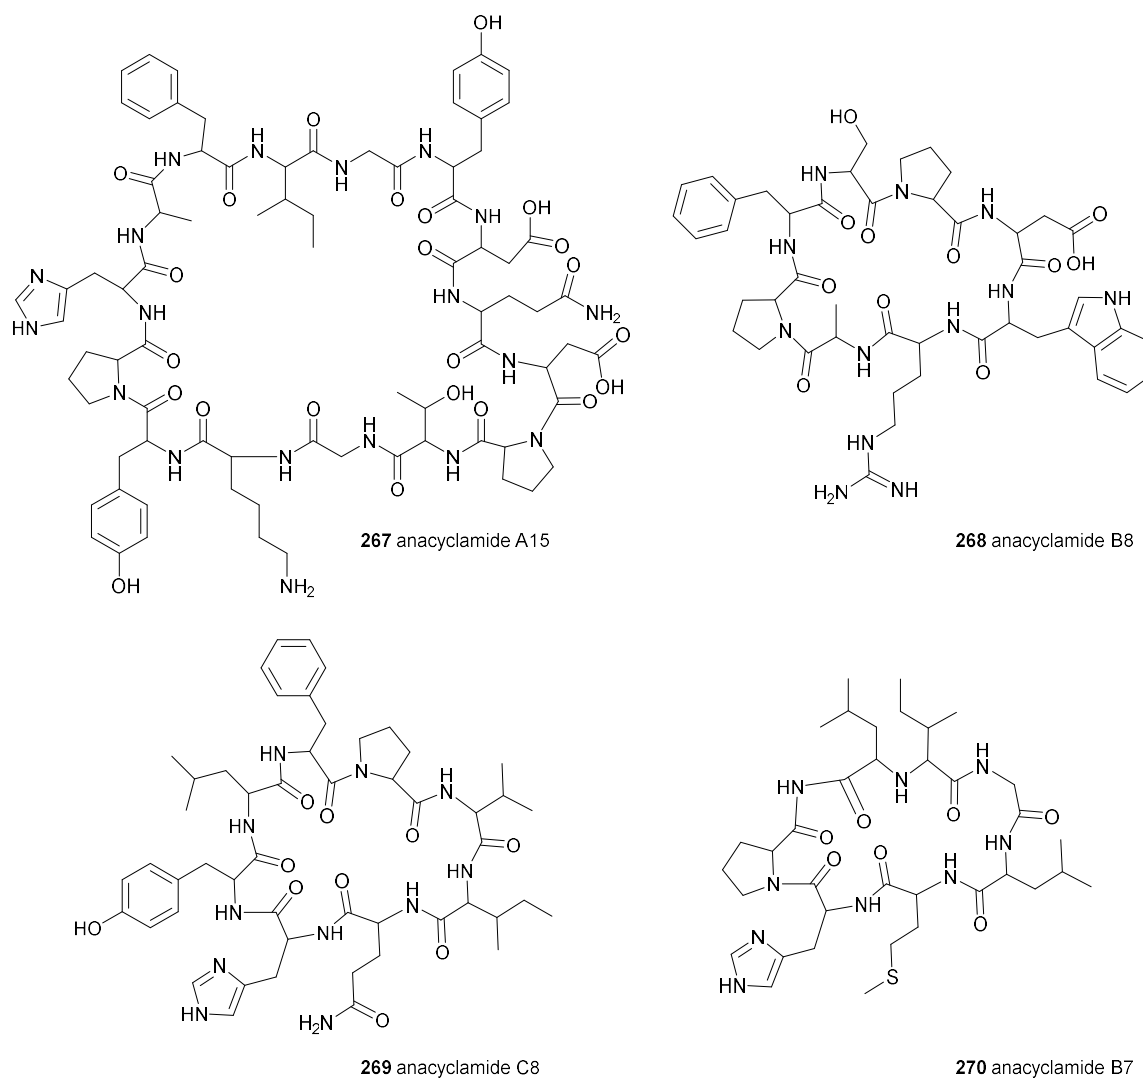

Table S1. (continued)

| #   | Compound             | Habitat | Producing organism            | DOI                            |
|-----|----------------------|---------|-------------------------------|--------------------------------|
| 271 | anacyclamide A7      | F       | <i>Anabaena</i> sp.           | 10.1128/AEM.01061-09           |
| 272 | piricyclamide 7005E2 | F       | <i>Microcystis aeruginosa</i> | 10.1371/journal.pone.0043002   |
| 273 | piricyclamide 7005E4 | F       | <i>Microcystis aeruginosa</i> | 10.1371/journal.pone.0043002   |
| 274 | prenylagaramide C    | F       | <i>Planktothrix agardhii</i>  | 10.1016/j.chembiol.2011.01.019 |

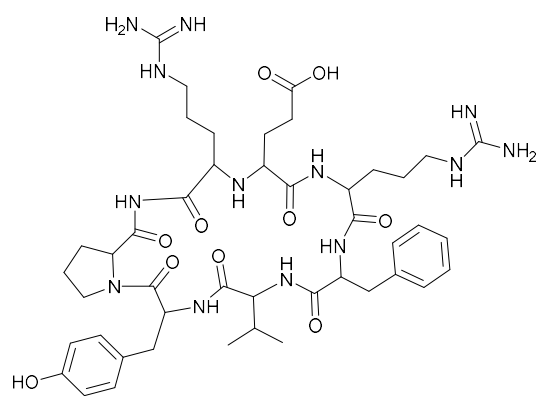

271 anacyclamide A7

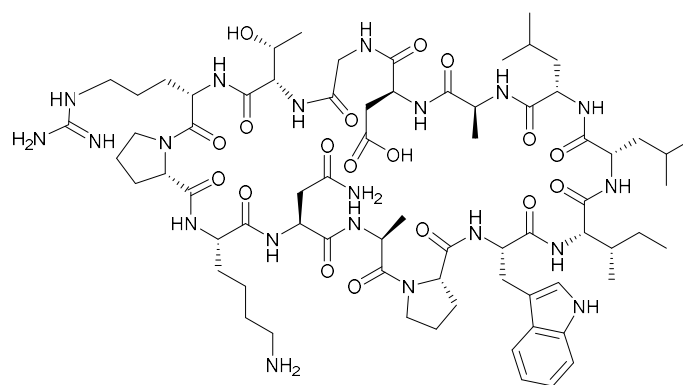

272 piricyclamide 7005E2

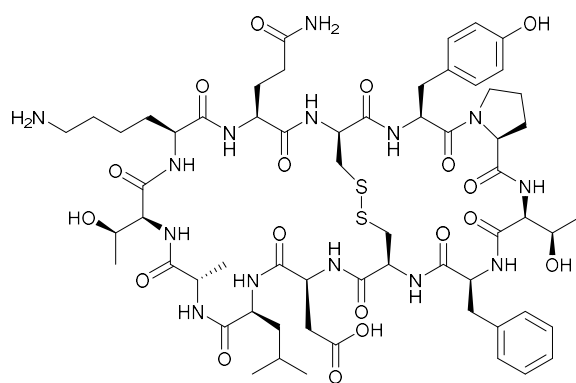

273 piricyclamide 7005E4

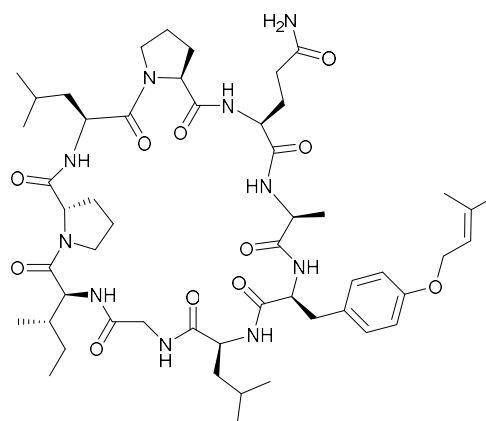

274 prenylagaramide C

Table S1. (continued)

| #   | Compound                    | Habitat | Producing organism           | DOI                            |
|-----|-----------------------------|---------|------------------------------|--------------------------------|
| 275 | arthrospiramide A           | n.r.    | <i>Arthrospira platensis</i> | 10.1016/j.chembiol.2011.01.019 |
| 276 | arthrospiramide B           | n.r.    | <i>Arthrospira platensis</i> | 10.1016/j.chembiol.2011.01.019 |
| 277 | arthrospiramide A sulfoxide | n.r.    | <i>Arthrospira platensis</i> | 10.1016/j.chembiol.2011.01.019 |
| 278 | arthrospiramide B sulfoxide | n.r.    | <i>Arthrospira platensis</i> | 10.1016/j.chembiol.2011.01.019 |

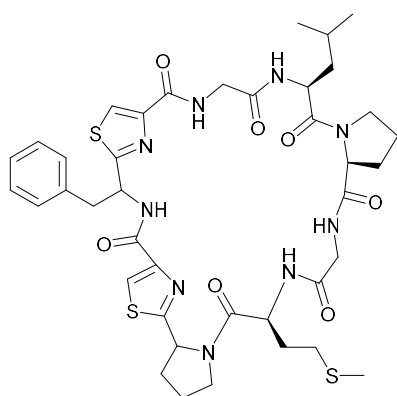

275 arthrospiramide A

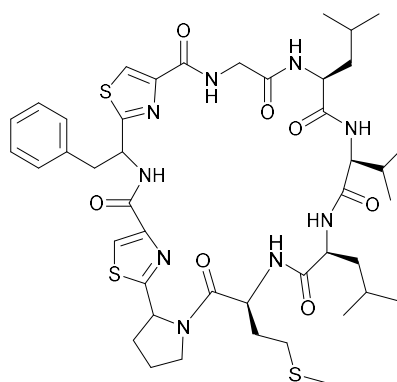

276 arthrospiramide B

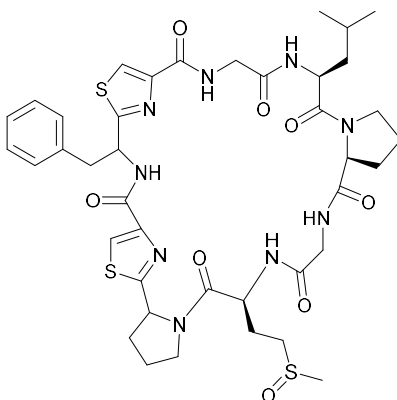

277 arthrospiramide A sulfoxide

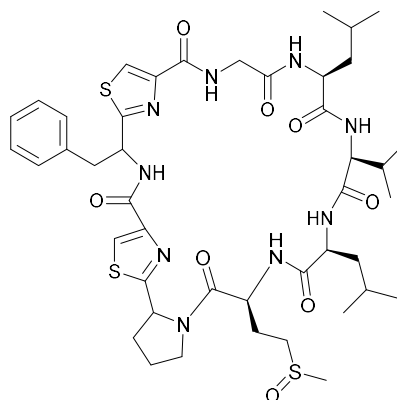

278 arthrospiramide B sulfoxide

Table S1. (continued)

| #   | Compound         | Habitat | Producing organism       | DOI                    |
|-----|------------------|---------|--------------------------|------------------------|
| 279 | cyanothecamide A | F       | <i>Cyanotheca</i> sp.    | 10.1002/cbic.201200661 |
| 280 | cyanothecamide B | F       | <i>Cyanotheca</i> sp.    | 10.1002/cbic.201200661 |
| 281 | cyanothecamide C | F       | <i>Cyanotheca</i> sp.    | 10.1002/cbic.201200661 |
| 282 | aestuaramide A   | M       | <i>Lyngbya aestuarii</i> | 10.1021/cb300614c      |
| 283 | aestuaramide B   | M       | <i>Lyngbya aestuarii</i> | 10.1021/cb300614c      |
| 284 | aestuaramide C   | M       | <i>Lyngbya aestuarii</i> | 10.1021/cb300614c      |
| 285 | aestuaramide D   | M       | <i>Lyngbya aestuarii</i> | 10.1021/cb300614c      |
| 286 | aestuaramide E   | M       | <i>Lyngbya aestuarii</i> | 10.1021/cb300614c      |
| 287 | aestuaramide F   | M       | <i>Lyngbya aestuarii</i> | 10.1021/cb300614c      |
| 288 | aestuaramide G   | M       | <i>Lyngbya aestuarii</i> | 10.1021/cb300614c      |
| 289 | aestuaramide H   | M       | <i>Lyngbya aestuarii</i> | 10.1021/cb300614c      |
| 290 | aestuaramide I   | M       | <i>Lyngbya aestuarii</i> | 10.1021/cb300614c      |
| 291 | aestuaramide J   | M       | <i>Lyngbya aestuarii</i> | 10.1021/cb300614c      |
| 292 | aestuaramide K   | M       | <i>Lyngbya aestuarii</i> | 10.1021/cb300614c      |
| 293 | aestuaramide L   | M       | <i>Lyngbya aestuarii</i> | 10.1021/cb300614c      |

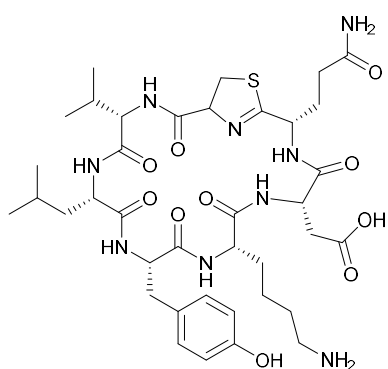

279 cyanothecamide A

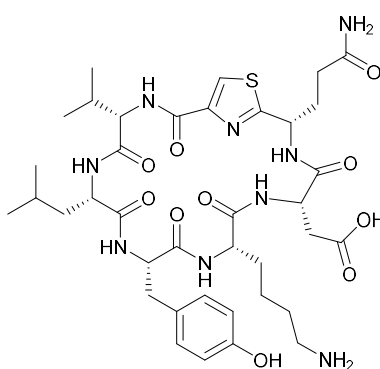

280 cyanothecamide B

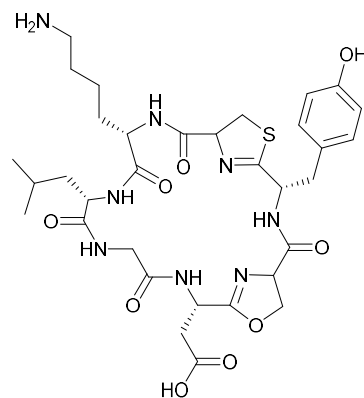

281 cyanothecamide C

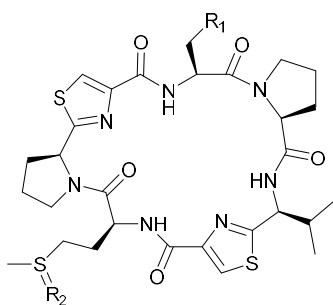282 aestuaramide A R<sub>1</sub> = Y, R<sub>2</sub> = lone pair283 aestuaramide B R<sub>1</sub> = X, R<sub>2</sub> = lone pair284 aestuaramide C R<sub>1</sub> = Z, R<sub>2</sub> = lone pair285 aestuaramide D R<sub>1</sub> = Y, R<sub>2</sub> = O286 aestuaramide E R<sub>1</sub> = X, R<sub>2</sub> = O287 aestuaramide F R<sub>1</sub> = Z, R<sub>2</sub> = O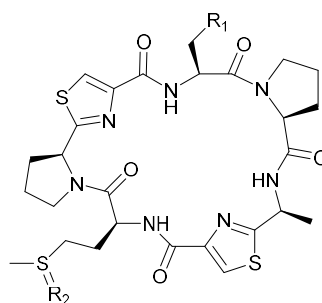288 aestuaramide G R<sub>1</sub> = Y, R<sub>2</sub> = lone pair289 aestuaramide H R<sub>1</sub> = X, R<sub>2</sub> = lone pair290 aestuaramide I R<sub>1</sub> = Z, R<sub>2</sub> = lone pair291 aestuaramide J R<sub>1</sub> = Y, R<sub>2</sub> = O292 aestuaramide K R<sub>1</sub> = X, R<sub>2</sub> = O293 aestuaramide L R<sub>1</sub> = Z, R<sub>2</sub> = O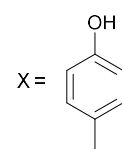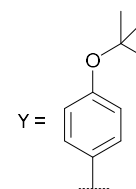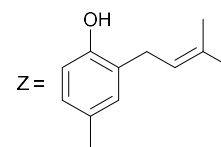

Table S1. (continued)

| #   | Compound        | Habitat | Producing organism          | DOI                          |
|-----|-----------------|---------|-----------------------------|------------------------------|
| 294 | autumnalamide   | M       | <i>Phormidium autumnale</i> | 10.1021/np500374a            |
| 295 | autumnalamide B | M       | <i>Phormidium autumnale</i> | 10.1039/D2CC01799G           |
| 296 | trikoramide A   | M       | <i>Symploca hydroides</i>   | 10.1021/acs.jnatprod.9b00675 |
| 297 | trikoramide B   | M       | <i>Symploca hydroides</i>   | 10.3390/md19100548           |

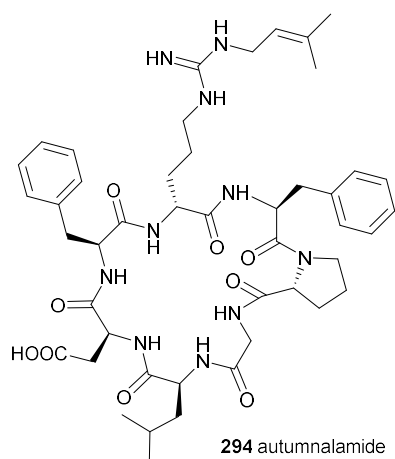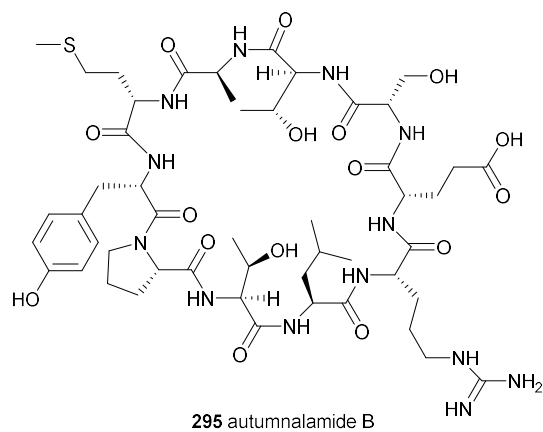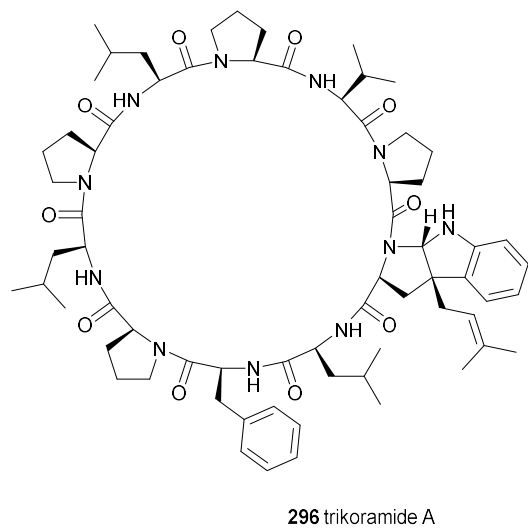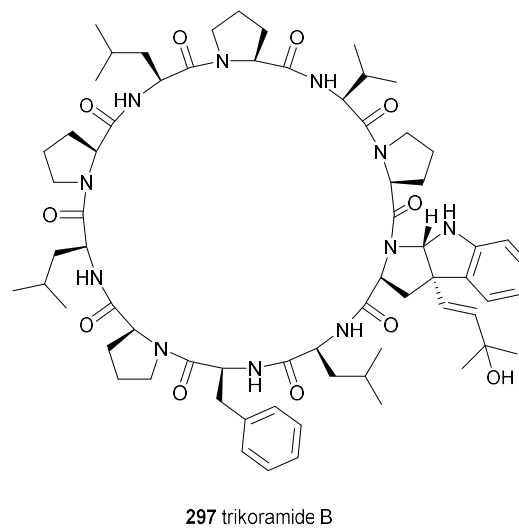

Table S1. (continued)

| #   | Compound          | Habitat | Producing organism        | DOI                          |
|-----|-------------------|---------|---------------------------|------------------------------|
| 298 | trikoramide C     | M       | <i>Symploca hydroides</i> | 10.3390/md19100548           |
| 299 | trikoramide D     | M       | <i>Symploca hydroides</i> | 10.3390/md19100548           |
| 300 | microphycin KB921 | F       | <i>Microcystis</i> spp.   | 10.3390/md13042347           |
| 301 | microseiramide    | F       | <i>Microseira</i> sp.     | 10.1016/j.phytol.2015.05.003 |
| 302 | wewakazole B      | M       | <i>Moorea producens</i>   | 10.1021/acs.jnatprod.6b00051 |

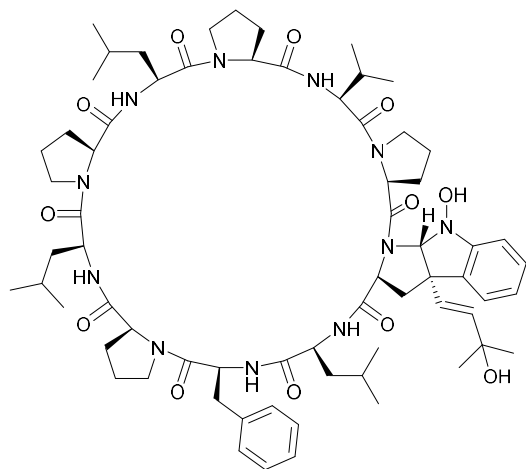

298 trikoramide C

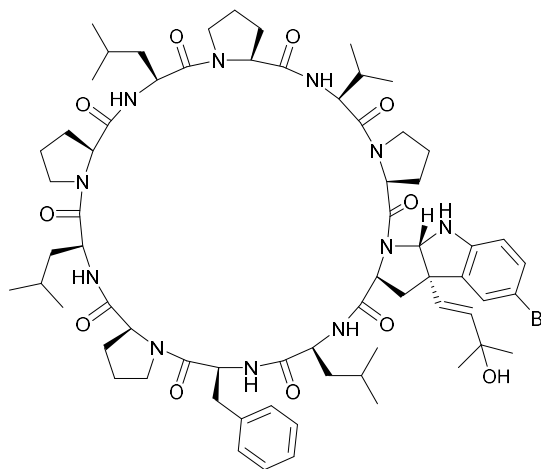

299 trikoramide D

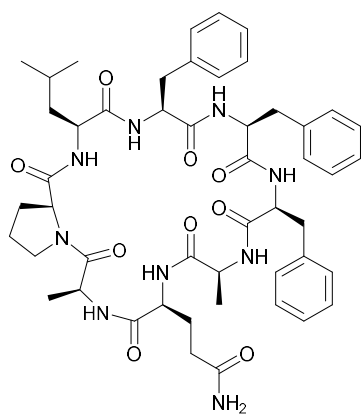

300 microphycin KB921

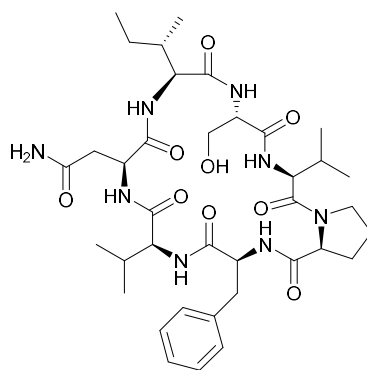

301 microseiramide

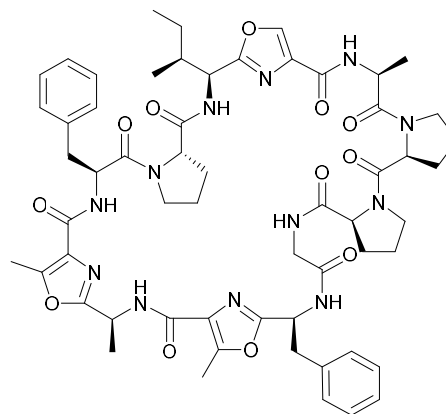

302 wewakazole B

Table S1. (continued)

| #   | Compound            | Habitat | Producing organism            | DOI                        |
|-----|---------------------|---------|-------------------------------|----------------------------|
| 303 | aeruginazole A      | F       | <i>Microcystis</i> sp.        | 10.1021/ol1014015          |
| 304 | aeruginazole DA1497 | F       | <i>Microcystis aeruginosa</i> | 10.1016/j.tet.2011.12.045  |
| 305 | aeruginazole DA1304 | F       | <i>Microcystis aeruginosa</i> | 10.1016/j.tet.2011.12.045  |
| 306 | aeruginazole DA1274 | F       | <i>Microcystis aeruginosa</i> | 10.1016/j.tet.2011.12.045  |
| 307 | sphaerocyclamide    | F       | <i>Sphaerospermopsis</i> sp.  | 10.1038/s41598-018-32618-5 |

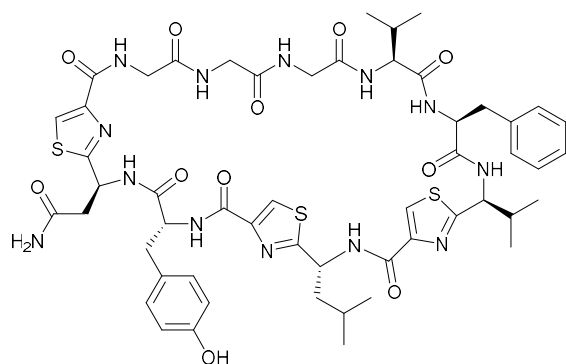

303 aeruginazole A

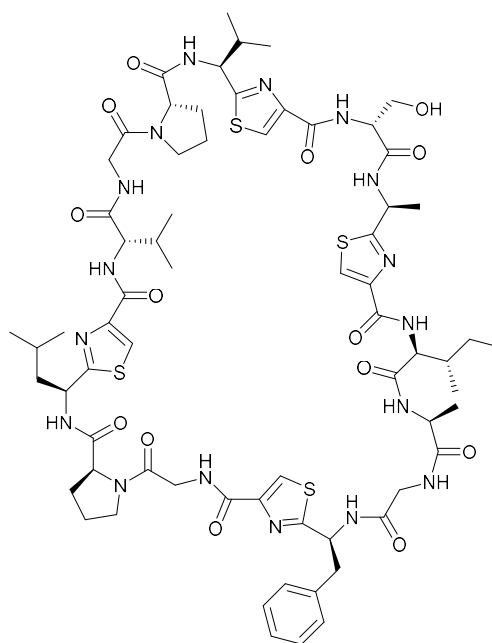

304 aeruginazole DA1497

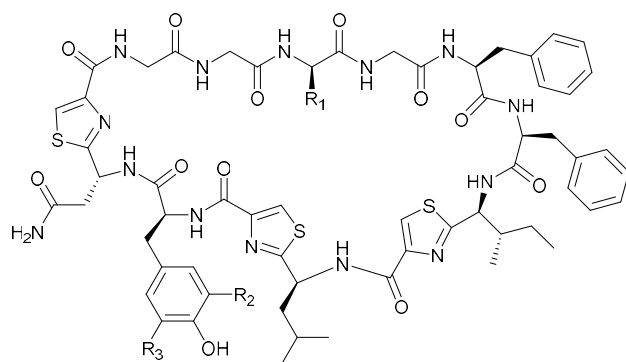

305 aeruginazole DA1304

R<sub>1</sub> = CH<sub>2</sub>OHR<sub>2</sub> = HR<sub>3</sub> = H

306 aeruginazole DA1274

R<sub>1</sub> = HR<sub>2</sub> = HR<sub>3</sub> = H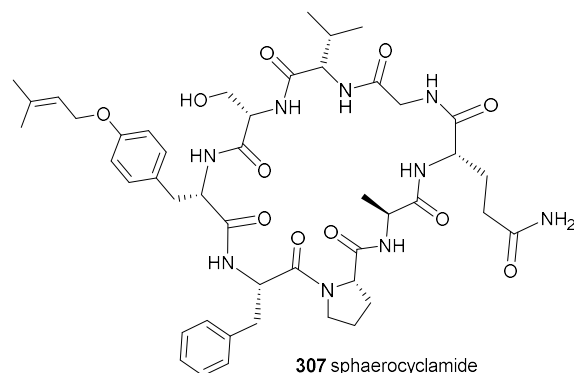

307 sphaerocyclamide



Table S1. (continued)

| #    | Compound              | Habitat | Producing organism                | DOI                            |
|------|-----------------------|---------|-----------------------------------|--------------------------------|
| 308  | argicyclamide A       | F       | <i>Microcystis aeruginosa</i>     | 10.1021/jacs.1c05732           |
| 309  | argicyclamide B       | F       | <i>Microcystis aeruginosa</i>     | 10.1021/jacs.1c05732           |
| 310  | argicyclamide C       | F       | <i>Microcystis aeruginosa</i>     | 10.1021/jacs.1c05732           |
| 311  | argicyclamide D       | F       | <i>Microcystis aeruginosa</i>     | 10.1111/pre.12529              |
| 312  | aeruginosamide B      | n.r.    | <i>Microcystis aeruginosa</i>     | 10.1016/j.chembiol.2013.06.015 |
| 313  | aeruginosamide C      | n.r.    | <i>Microcystis aeruginosa</i>     | 10.1016/j.chembiol.2013.06.015 |
| 314* | viridisamide A        | n.r.    | <i>Oscillatoria nigro-viridis</i> | 10.1016/j.chembiol.2013.06.015 |
| 315  | aeruginosamide AEG671 | B       | <i>Limnoraphis</i> sp.            | 10.3390/md18090446             |

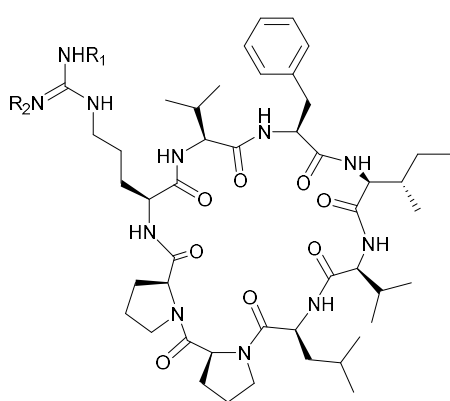308 argicyclamide A R<sub>1</sub>= dimethylallyl R<sub>2</sub>= dimethylallyl309 argicyclamide B R<sub>1</sub>= dimethylallyl R<sub>2</sub>= H310 argicyclamide C R<sub>1</sub>= H R<sub>2</sub>= H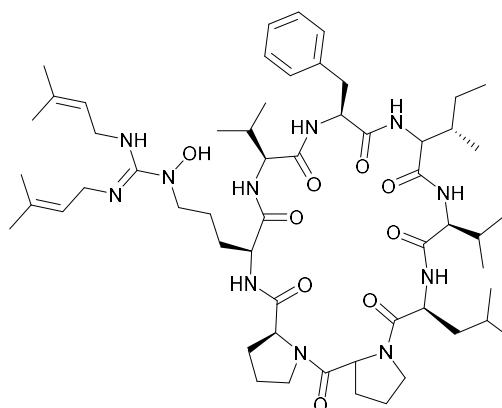

311 argicyclamide D

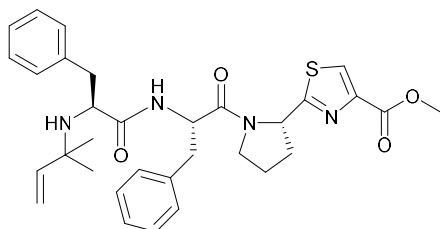

312 aeruginosamide B

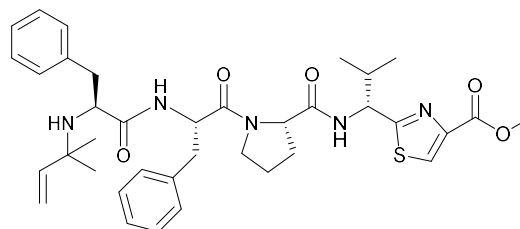

313 aeruginosamide C

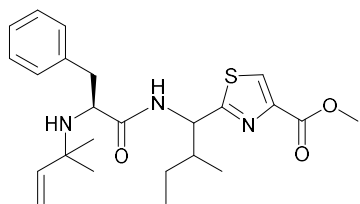

314\* viridisamide A

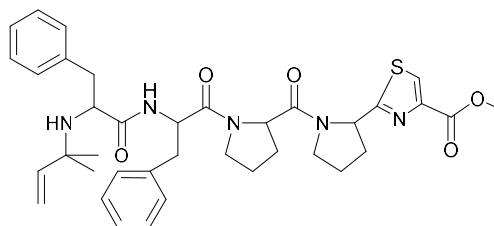

315 aeruginosamide AEG671

Table S1. (continued)

| #    | Compound            | Habitat | Producing organism      | DOI                          |
|------|---------------------|---------|-------------------------|------------------------------|
| 316* | muscoride B         | F       | <i>Nostoc</i> sp.       | 10.1021/acscchembio.9b00620  |
| 317  | scytodecamide       | F       | <i>Scytonema</i> sp.    | 10.1002/cbic.201900511       |
| 318  | microviridin LH1667 | F       | <i>Microcystis</i> sp.  | 10.1016/j.tet.2014.07.057    |
| 319  | microviridin 1777   | F       | <i>Microcystis</i> spp. | 10.1021/acs.jnatprod.9b00986 |

316\* muscoride B

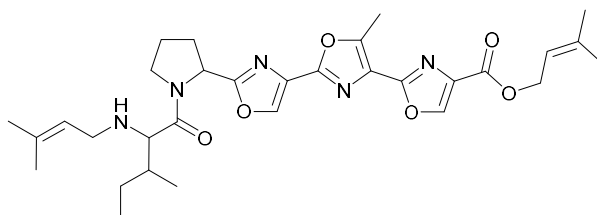

317 scytodecamide

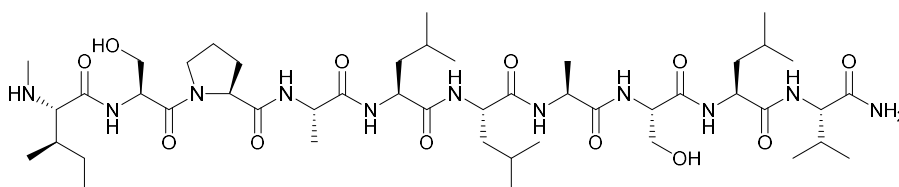

318 microviridin LH1667

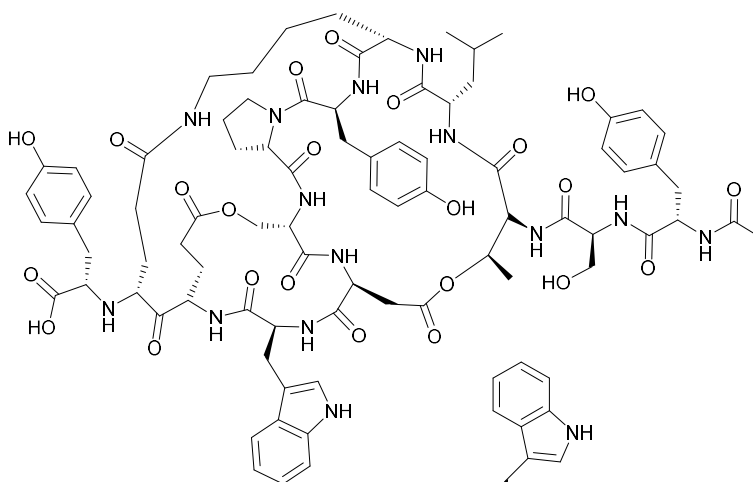

319 microviridin 1777

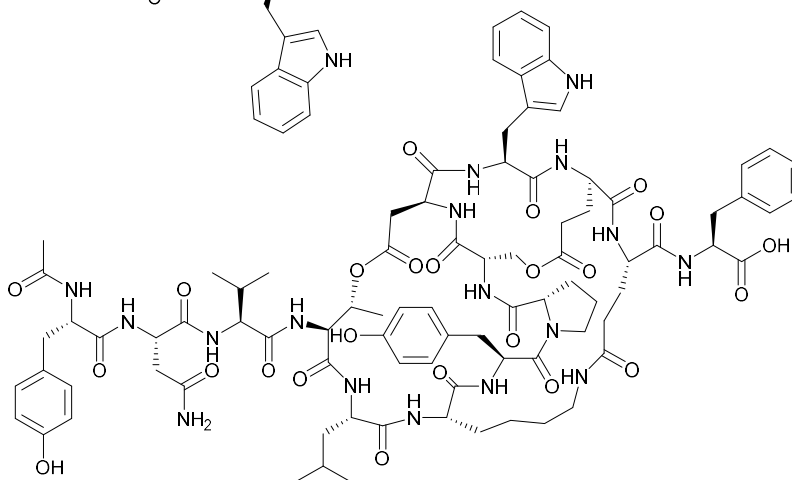

Table S1. (continued)

| #   | Compound        | Habitat | Producing organism        | DOI                        |
|-----|-----------------|---------|---------------------------|----------------------------|
| 320 | microviridin N9 | F       | <i>Nostoc punctiforme</i> | 10.1021/acschembio.9b00240 |
| 321 | microviridin N8 | F       | <i>Nostoc punctiforme</i> | 10.1021/acschembio.9b00240 |
| 322 | microviridin N7 | F       | <i>Nostoc punctiforme</i> | 10.1021/acschembio.9b00240 |

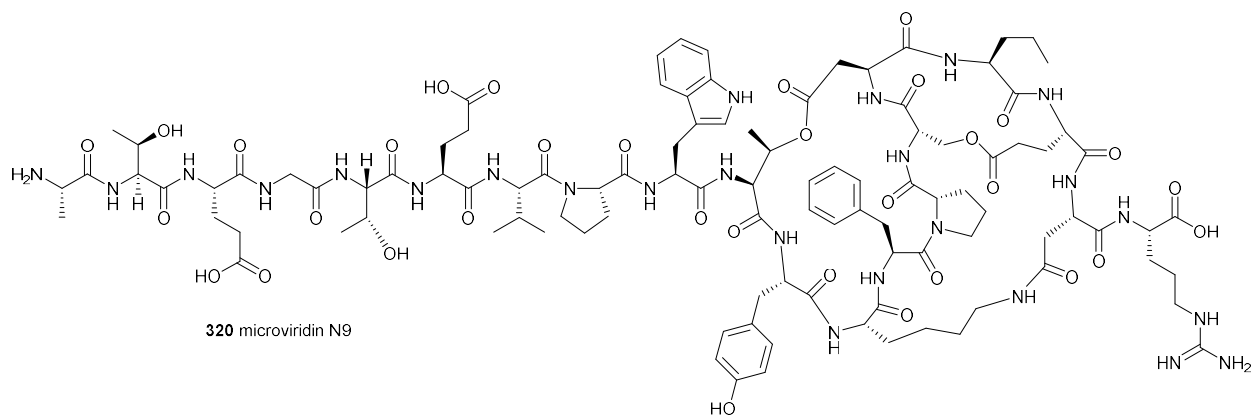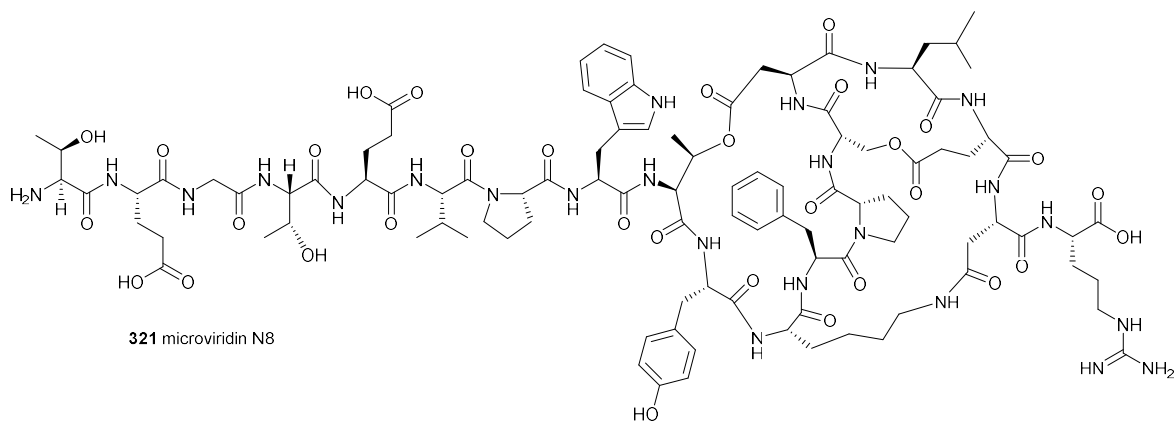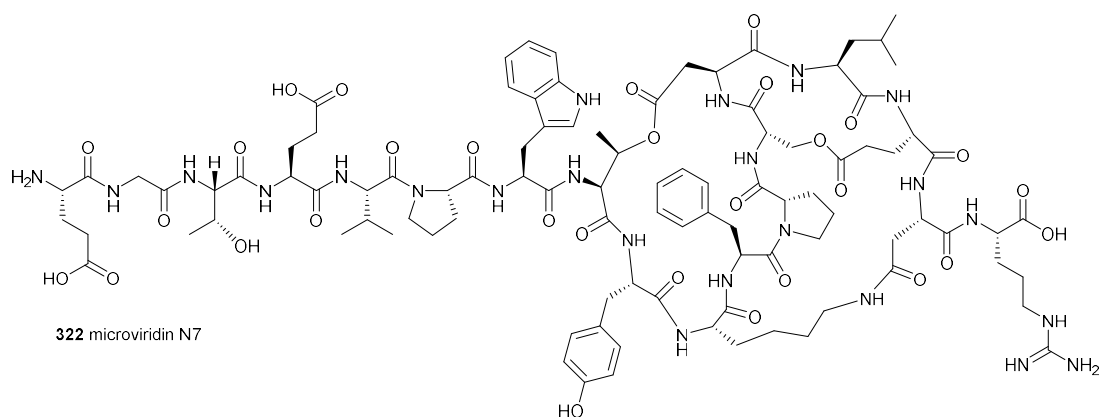

Table S1. (continued)

| #   | Compound        | Habitat | Producing organism        | DOI                        |
|-----|-----------------|---------|---------------------------|----------------------------|
| 323 | microviridin N6 | F       | <i>Nostoc punctiforme</i> | 10.1021/acschembio.9b00240 |
| 324 | microviridin N5 | F       | <i>Nostoc punctiforme</i> | 10.1021/acschembio.9b00240 |
| 325 | microviridin N4 | F       | <i>Nostoc punctiforme</i> | 10.1021/acschembio.9b00240 |

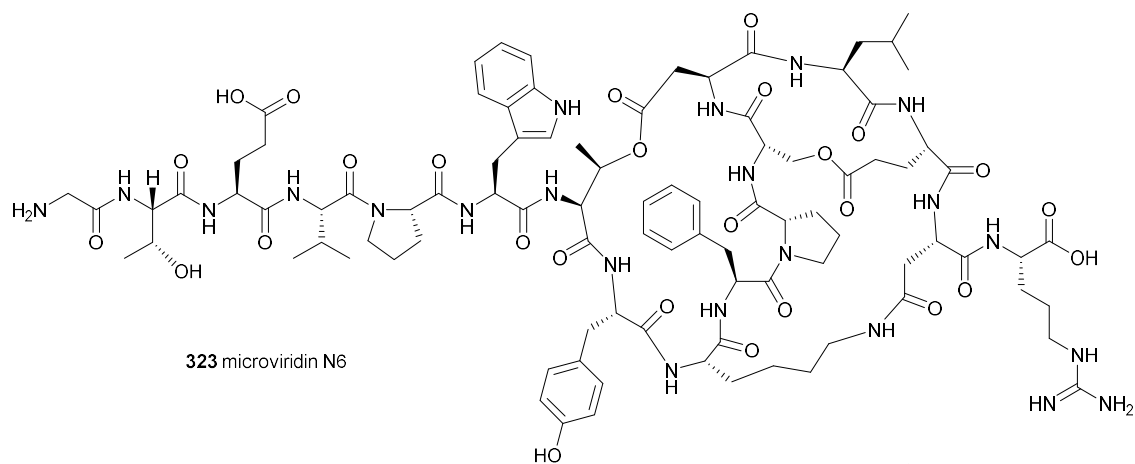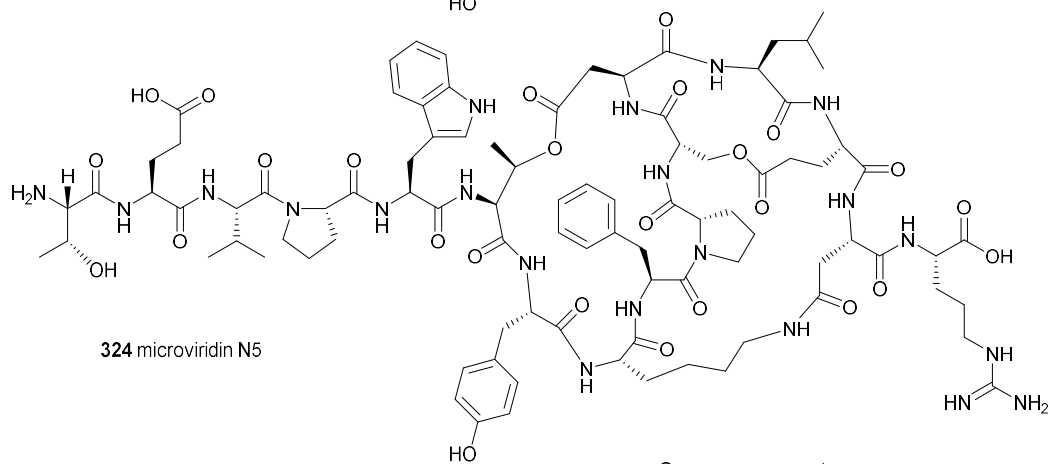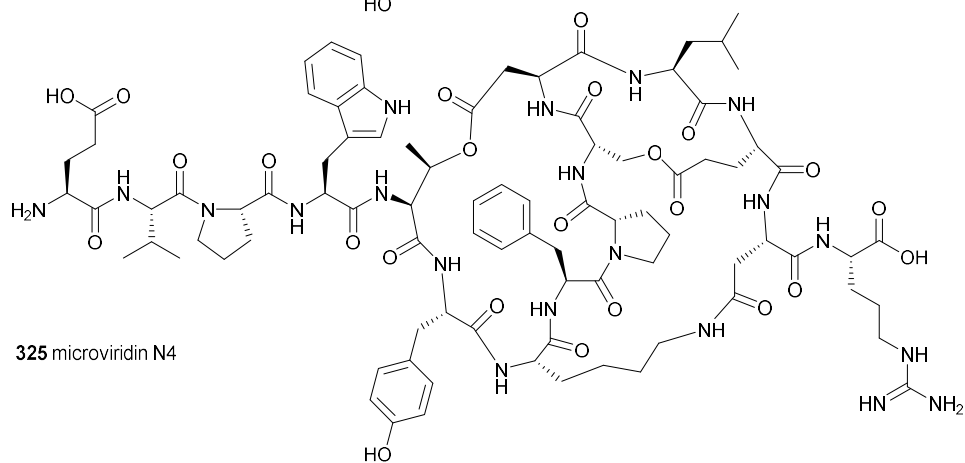

Table S1. (continued)

| #   | Compound          | Habitat | Producing organism        | DOI                         |
|-----|-------------------|---------|---------------------------|-----------------------------|
| 326 | microviridin N3   | F       | <i>Nostoc punctiforme</i> | 10.1021/acscchembio.9b00240 |
| 327 | microviridin 1688 | F       | <i>Nostoc</i> sp.         | 10.1128/msphere.00562-21    |
| 328 | microviridin 1739 | F       | <i>Nostoc</i> sp.         | 10.1128/msphere.00562-21    |

326 microviridin N3

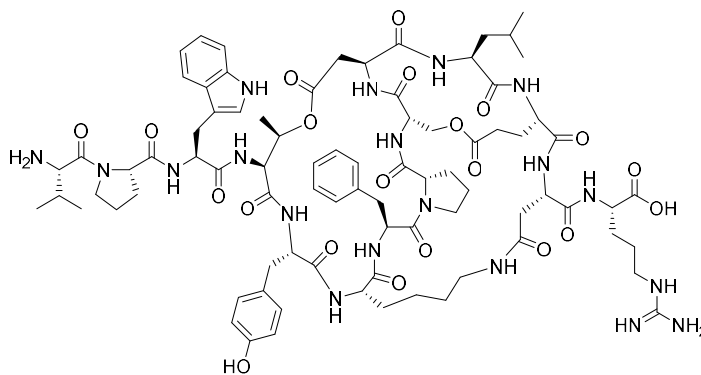

327 microviridin-1688

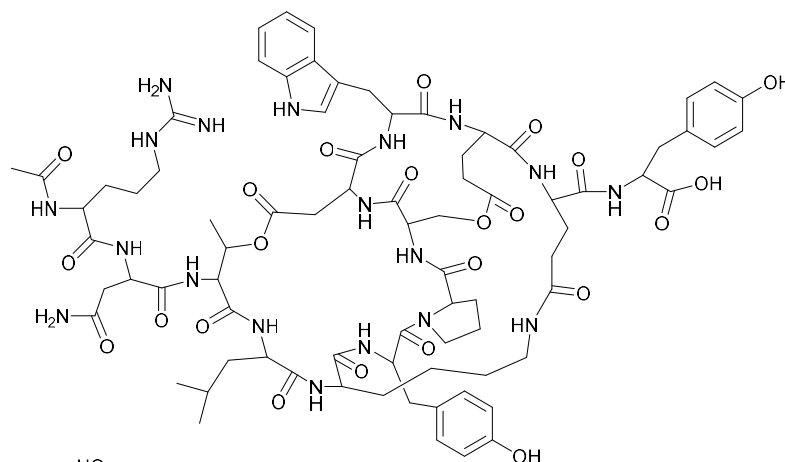

328 microviridin-1739

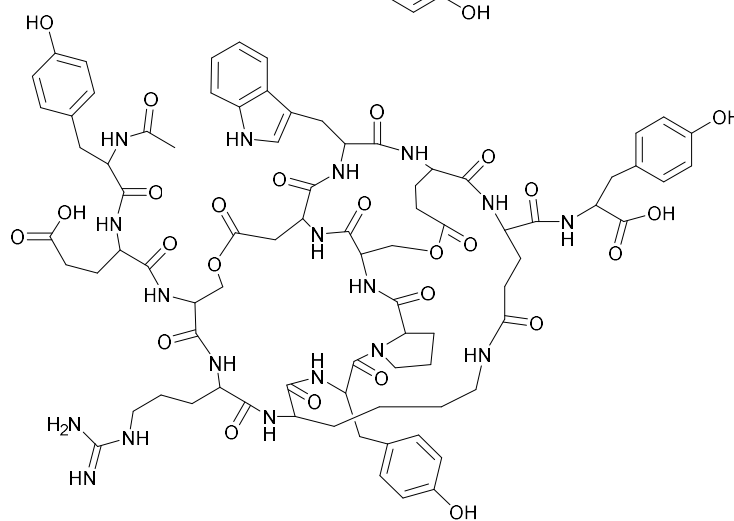

Table S1. (continued)

| #   | Compound          | Habitat | Producing organism      | DOI                          |
|-----|-------------------|---------|-------------------------|------------------------------|
| 329 | microviridin 1748 | F       | <i>Nostoc</i> sp.       | 10.1128/msphere.00562-21     |
| 330 | samoamide A       | M       | <i>Symploca</i> sp.     | 10.1021/acs.jnatprod.6b00907 |
| 331 | croissamide       | M       | <i>Symploca</i> sp.     | 10.1016/j.tetlet.2018.09.016 |
| 332 | motobamide        | M       | <i>Leptolyngbya</i> sp. | 10.1021/acs.jnatprod.1c00234 |
| 333 | lingaoamide       | F       | <i>Oscillatoria</i> sp. | 10.1016/j.tetlet.2021.153214 |

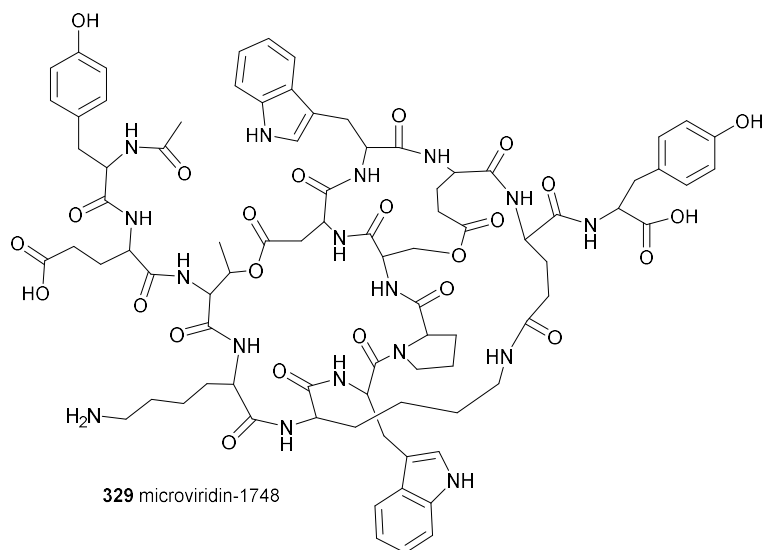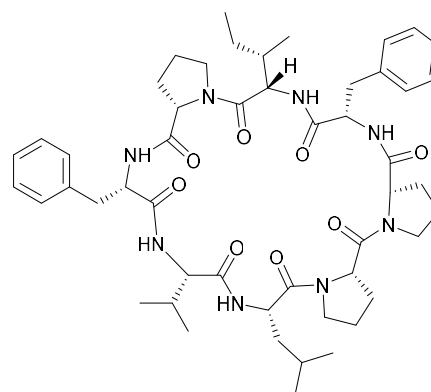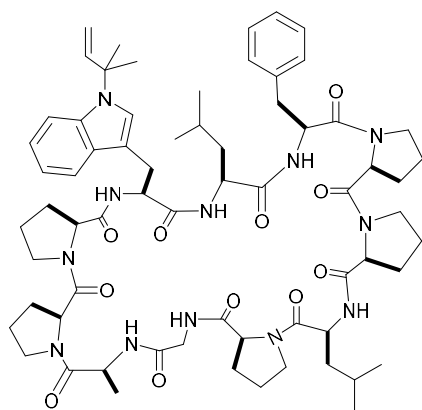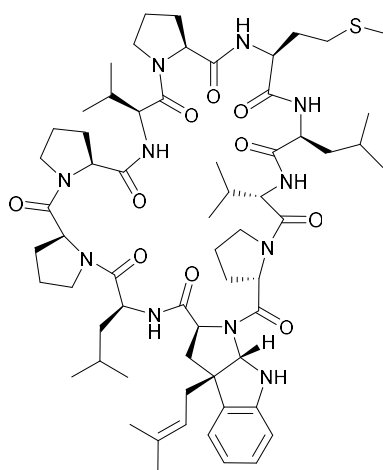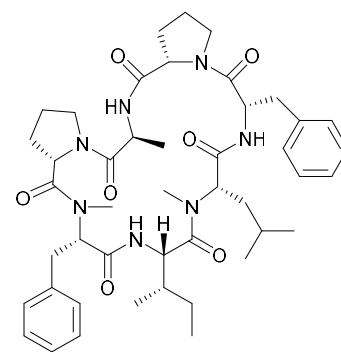

Table S1. (continued)

| #   | Compound        | Habitat | Producing organism       | DOI                             |
|-----|-----------------|---------|--------------------------|---------------------------------|
| 334 | kamptornamide   | F       | <i>Kamptonema</i> sp.    | 10.1073/pnas.2113120119         |
| 335 | pitipeptolide C | M       | <i>Lyngbya majuscula</i> | 10.1016/j.phytochem.2011.07.014 |
| 336 | pitipeptolide D | M       | <i>Lyngbya majuscula</i> | 10.1016/j.phytochem.2011.07.014 |
| 337 | pitipeptolide E | M       | <i>Lyngbya majuscula</i> | 10.1016/j.phytochem.2011.07.014 |
| 338 | pitipeptolide F | M       | <i>Lyngbya majuscula</i> | 10.1016/j.phytochem.2011.07.014 |
| 339 | benderamide A   | M       | <i>Lyngbya</i> sp.       | 10.3390/md16110409              |
| 340 | viequeamide A   | M       | <i>Rivularia</i> sp.     | 10.1021/np300321b               |

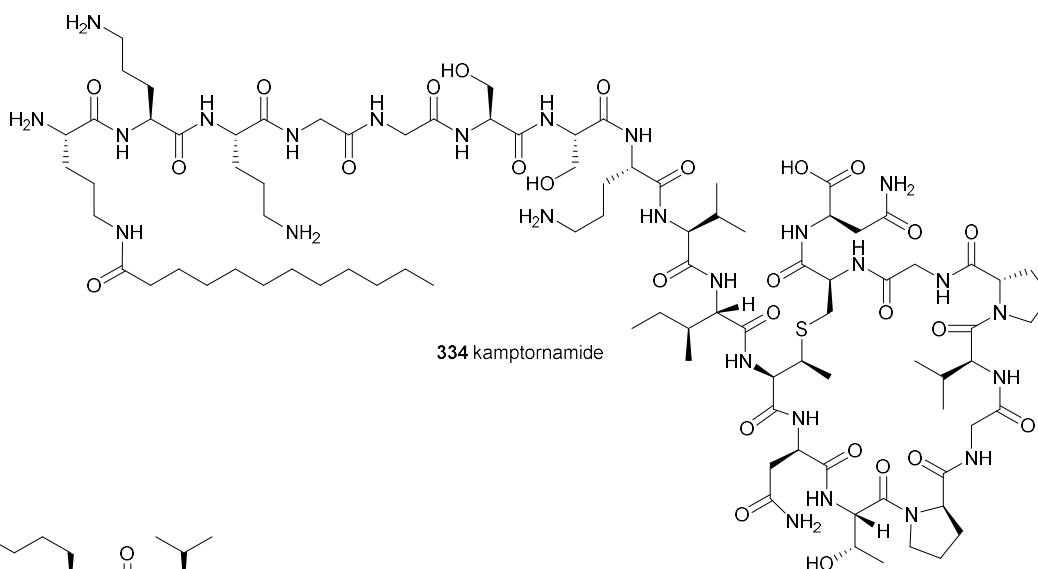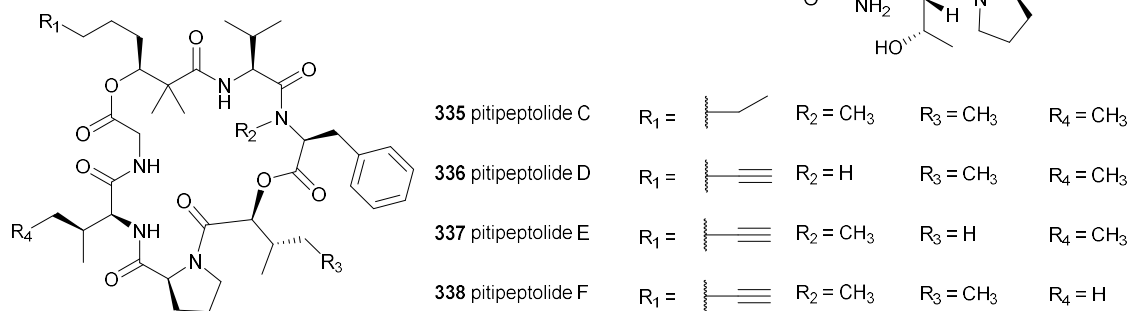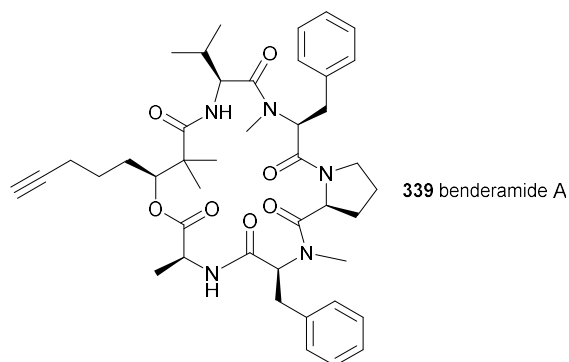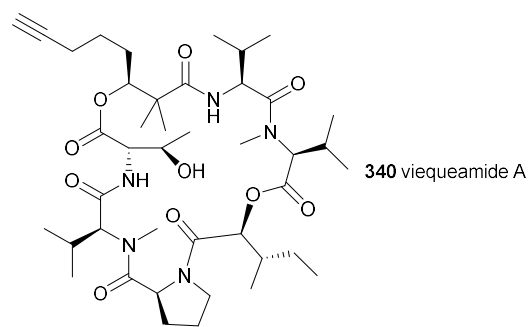

Table S1. (continued)

| #   | Compound      | Habitat | Producing organism       | DOI                             |
|-----|---------------|---------|--------------------------|---------------------------------|
| 341 | viequeamide B | M       | <i>Rivularia</i> sp.     | 10.1021/np300321b               |
| 342 | viequeamide C | M       | <i>Rivularia</i> sp.     | 10.1021/np300321b               |
| 343 | viequeamide D | M       | <i>Rivularia</i> sp.     | 10.1021/np300321b               |
| 344 | kohamamide A  | M       | <i>Okeania</i> sp.       | 10.1021/acs.jnatprod.7b00256    |
| 345 | kohamamide B  | M       | <i>Okeania</i> sp.       | 10.1021/acs.jnatprod.7b00256    |
| 346 | kohamamide C  | M       | <i>Okeania</i> sp.       | 10.1021/acs.jnatprod.7b00256    |
| 347 | hantupeptin B | M       | <i>Lyngbya majuscula</i> | 10.1016/j.phytochem.2009.10.006 |
| 348 | hantupeptin C | M       | <i>Lyngbya majuscula</i> | 10.1016/j.phytochem.2009.10.006 |
| 349 | tiahuramide A | M       | <i>Lyngbya majuscula</i> | 10.1021/acs.jnatprod.7b00751    |
| 350 | tiahuramide B | M       | <i>Lyngbya majuscula</i> | 10.1021/acs.jnatprod.7b00751    |
| 351 | tiahuramide C | M       | <i>Lyngbya majuscula</i> | 10.1021/acs.jnatprod.7b00751    |

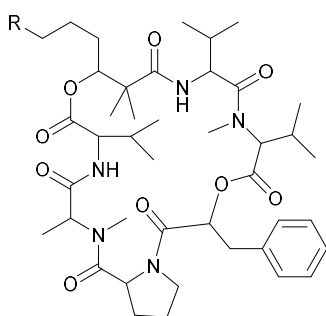

341 viequeamide B R =

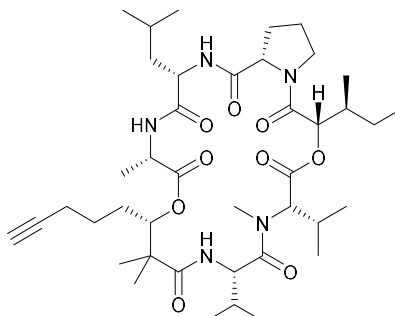

345 kohamamide A

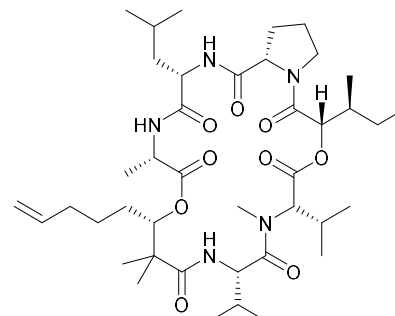

346 kohamamide B

342 viequeamide C R =

343 viequeamide D R =

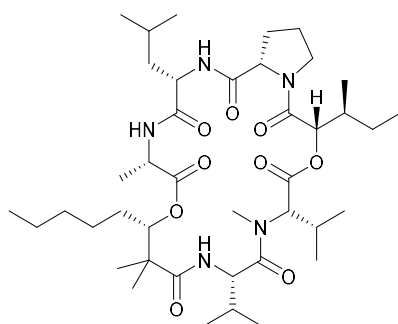

347 kohamamide C

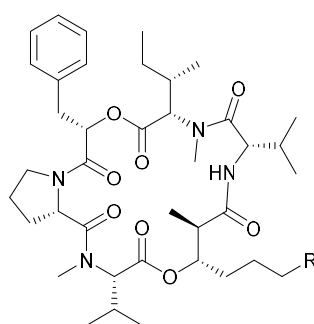

348 hantupeptin B R =

349 hantupeptin C R =

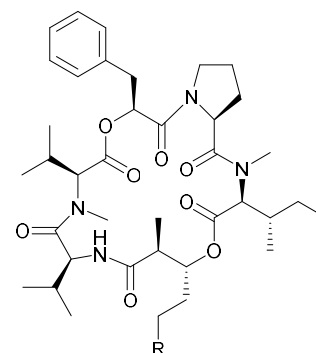

349 tiahuramide A R =

350 tiahuramide B R =

351 tiahuramide C R =



Table S1. (continued)

| #   | Compound        | Habitat | Producing organism                    | DOI                             |
|-----|-----------------|---------|---------------------------------------|---------------------------------|
| 352 | veraguamide A   | M       | <i>Symploca</i> cf. <i>hydnoides</i>  | 10.1021/np200076t               |
| 353 | veraguamide B   | M       | <i>Symploca</i> cf. <i>hydnoides</i>  | 10.1021/np200076t               |
| 354 | veraguamide C   | M       | <i>Symploca</i> cf. <i>hydnoides</i>  | 10.1021/np200076t               |
| 355 | veraguamide D   | M       | <i>Symploca</i> cf. <i>hydnoides</i>  | 10.1021/np200076t               |
| 356 | veraguamide E   | M       | <i>Symploca</i> cf. <i>hydnoides</i>  | 10.1021/np200076t               |
| 357 | veraguamide F   | M       | <i>Symploca</i> cf. <i>hydnoides</i>  | 10.1021/np200076t               |
| 358 | veraguamide G   | M       | <i>Symploca</i> cf. <i>hydnoides</i>  | 10.1021/np200076t               |
| 359 | veraguamide H   | M       | cf. <i>Oscillatoria margaritifera</i> | 10.1021/np200077f               |
| 360 | veraguamide I   | M       | cf. <i>Oscillatoria margaritifera</i> | 10.1021/np200077f               |
| 361 | veraguamide J   | M       | cf. <i>Oscillatoria margaritifera</i> | 10.1021/np200077f               |
| 362 | odobromoamide   | M       | <i>Okeania</i> sp.                    | 10.1246/bcsj.20160417           |
| 363 | trikoveramide A | M       | <i>Symploca</i> <i>hydnoides</i>      | 10.1016/j.phytochem.2021.112879 |
| 364 | trikoveramide B | M       | <i>Symploca</i> <i>hydnoides</i>      | 10.1016/j.phytochem.2021.112879 |
| 365 | trikoveramide C | M       | <i>Symploca</i> <i>hydnoides</i>      | 10.1016/j.phytochem.2021.112879 |

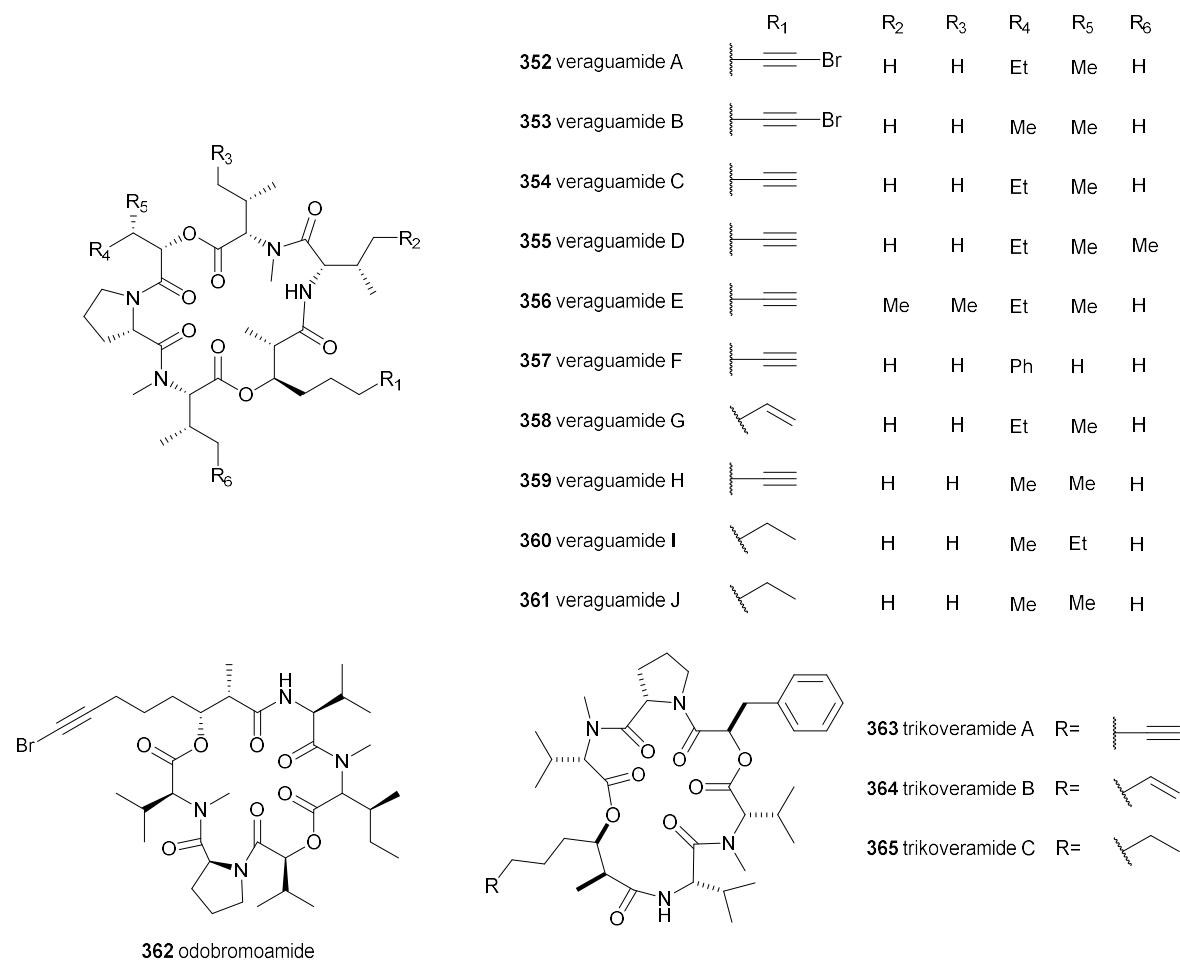

Table S1. (continued)

| #   | Compound        | Habitat | Producing organism                    | DOI                           |
|-----|-----------------|---------|---------------------------------------|-------------------------------|
| 366 | veraguamide K   | M       | cf. <i>Oscillatoria margaritifera</i> | 10.1021/np200077f             |
| 367 | veraguamide L   | M       | cf. <i>Oscillatoria margaritifera</i> | 10.1021/np200077f             |
| 368 | cocosamide A    | M       | <i>Lyngbya majuscula</i>              | 10.1021/np1008015             |
| 369 | cocosamide B    | M       | <i>Lyngbya majuscula</i>              | 10.1021/np1008015             |
| 370 | floridamide     | M       | <i>Moorea producens</i>               | 10.1080/14786419.2016.1207074 |
| 371 | pemukainalide A | M       | <i>Symploca hydroides</i>             | 10.1021/acs.jnatprod.1c00996  |
| 372 | pemukainalide B | M       | <i>Symploca hydroides</i>             | 10.1021/acs.jnatprod.1c00996  |
| 373 | yuvalamide A    | M       | <i>Lyngbya</i>                        | 10.7554/eLife.24214           |
| 374 | yuvalamide B    | M       | <i>Lyngbya</i>                        | 10.7554/eLife.24214           |

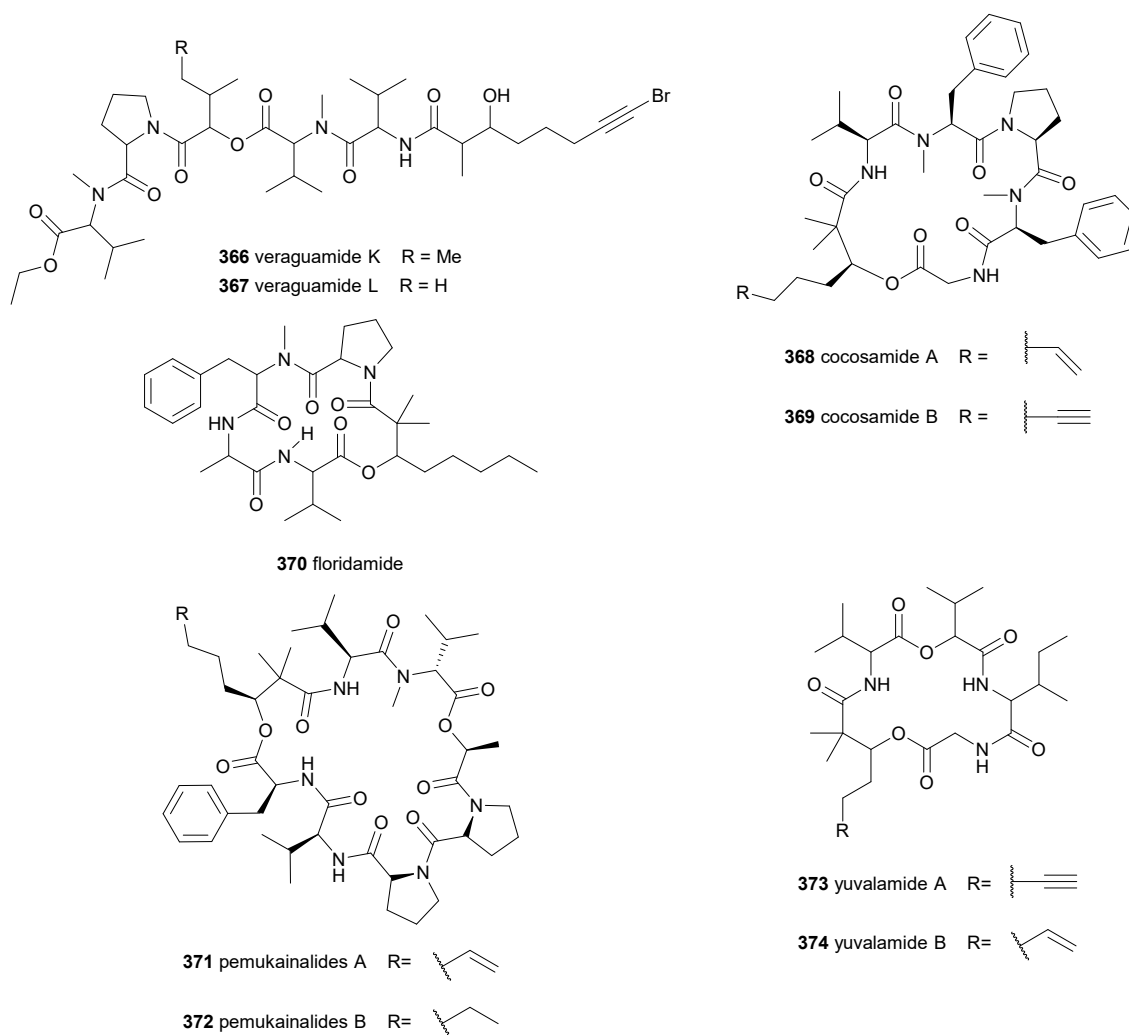

Table S1. (continued)

| #   | Compound        | Habitat | Producing organism       | DOI                          |
|-----|-----------------|---------|--------------------------|------------------------------|
| 375 | guineamide G    | M       | <i>Lyngbya majuscula</i> | 10.4014/jmb.1105.05011       |
| 376 | dudawalamide A  | M       | <i>Moorea producens</i>  | 10.1021/acs.jnatprod.7b00034 |
| 377 | dudawalamide B  | M       | <i>Moorea producens</i>  | 10.1021/acs.jnatprod.7b00034 |
| 378 | dudawalamide C  | M       | <i>Moorea producens</i>  | 10.1021/acs.jnatprod.7b00034 |
| 379 | dudawalamide D  | M       | <i>Moorea producens</i>  | 10.1021/acs.jnatprod.7b00034 |
| 380 | wewakamide A    | M       | <i>Lyngbya semiplena</i> | 10.4014/jmb.1105.05011       |
| 381 | companeramide A | M       | assemblage               | 10.1021/np5007907            |
| 382 | companeramide B | M       | assemblage               | 10.1021/np5007907            |

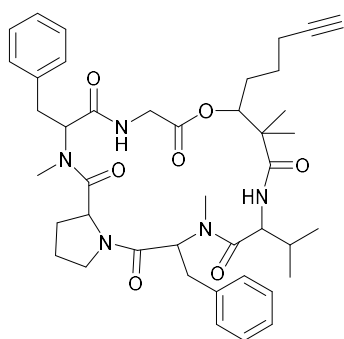

375 uineamide G

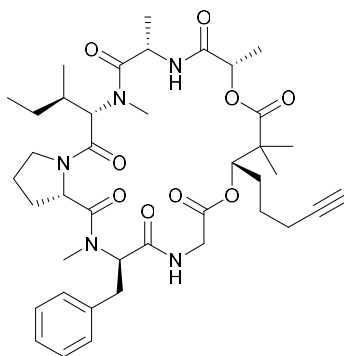

376 dudawalamide A

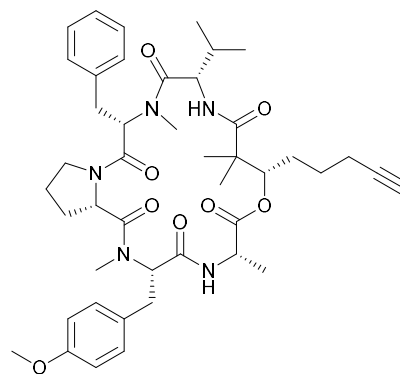

377 dudawalamide B

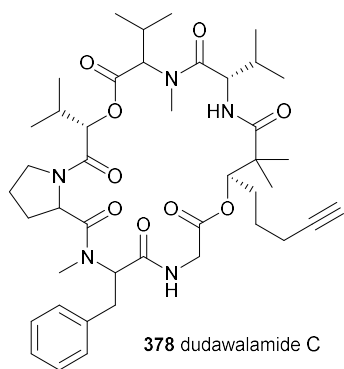

378 dudawalamide C

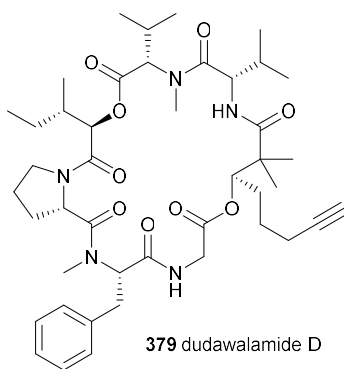

379 dudawalamide D

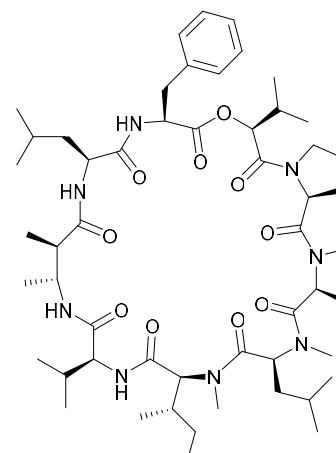

380 wewakamide A

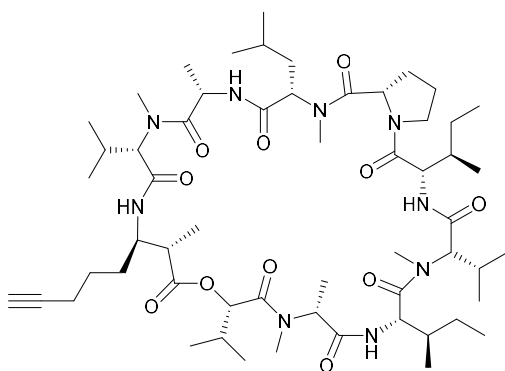

381 companeramide A

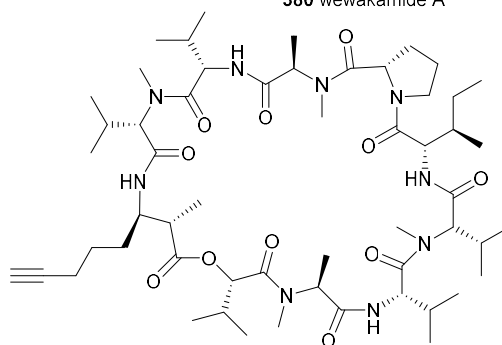

382 companeramide B

Table S1. (continued)

| #    | Compound         | Habitat | Producing organism       | DOI                          |
|------|------------------|---------|--------------------------|------------------------------|
| 383  | portobelamide A  | M       | <i>Caldora</i> sp.       | 10.1021/acs.jnatprod.0c01383 |
| 384  | portobelamide B  | M       | <i>Caldora</i> sp.       | 10.1021/acs.jnatprod.0c01383 |
| 385* | caciqueamide     | M       | <i>Caldora</i> sp.       | 10.1021/acs.jnatprod.0c01383 |
| 386  | palmyramide A    | M       | <i>Lyngbya majuscula</i> | 10.1021/np900428h            |
| 387  | pitiprolamide    | M       | <i>Lyngbya majuscula</i> | 10.1021/np1006839            |
| 388  | precarriebowmide | M       | <i>Moorea producens</i>  | 10.1021/np400347f            |

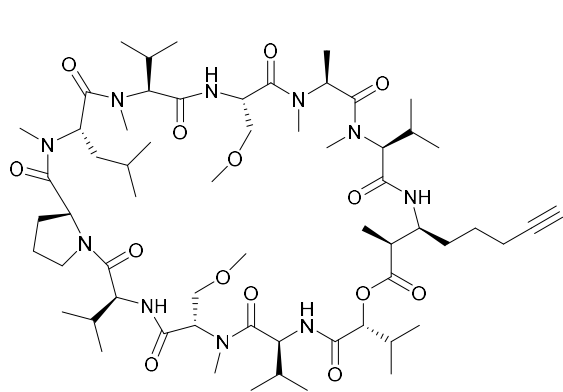

383 portobelamide A

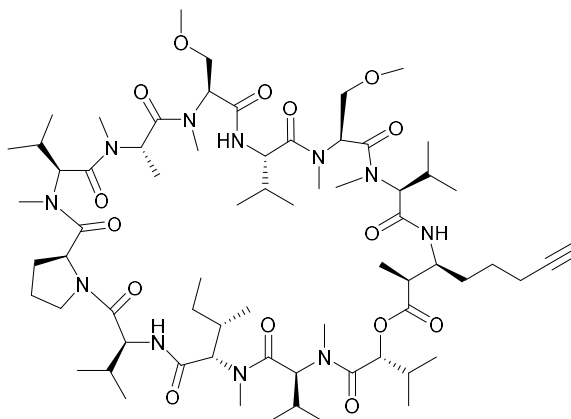

384 portobelamide B

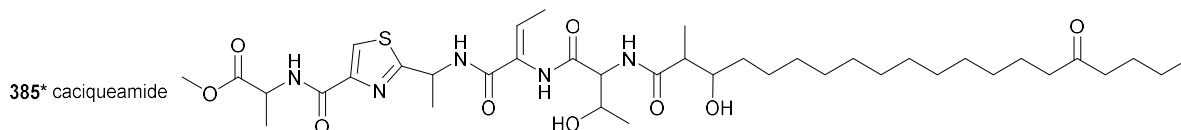

385\* caciqueamide

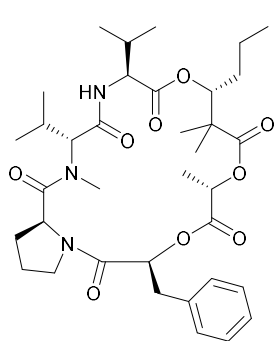

386 palmyramide A

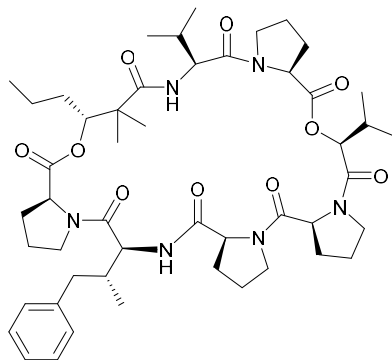

387 pitiprolamide

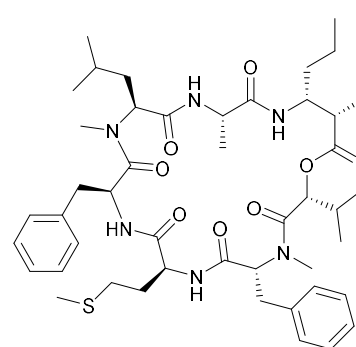

388 precarriebowmide

Table S1. (continued)

| #   | Compound                   | Habitat | Producing organism         | DOI                         |
|-----|----------------------------|---------|----------------------------|-----------------------------|
| 389 | medusamide                 | M       | n.r.                       | 10.1021/acs.orglett.5b03110 |
| 390 | kakeromamide A             | M       | <i>Moorea bouillonii</i>   | 10.1016/j.bmcl.2018.04.067  |
| 391 | kakeromamide B             | M       | <i>Moorea producens</i>    | 10.3390/md18030167          |
| 392 | porpoisamide A             | M       | <i>Lyngbya</i> sp.         | 10.1016/j.bmc.2011.05.051   |
| 393 | porpoisamide B             | M       | <i>Lyngbya</i> sp.         | 10.1016/j.bmc.2011.05.051   |
| 394 | scytonemide B              | F       | <i>Scytonema hofmannii</i> | 10.1021/np100600z           |
| 395 | scytonemide A              | F       | <i>Scytonema hofmannii</i> | 10.1021/np100600z           |
| 396 | nostocyclopeptide M1       | M       | <i>Nostoc</i> sp.          | 10.1002/cbic.201000179      |
| 397 | nostocyclopeptide Ncp-A2-L | M       | <i>Nostoc edaphicum</i>    | 10.3390/md18090442          |

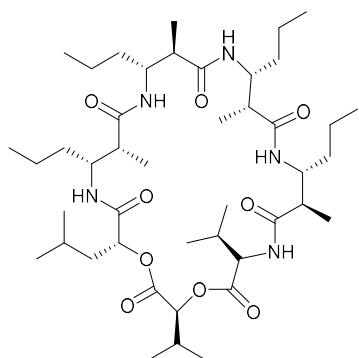

389 medusamide

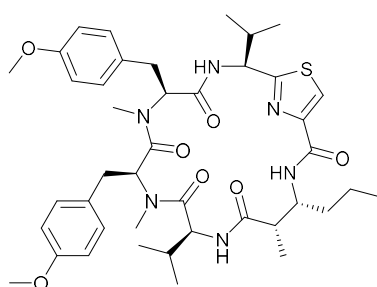

390 kakeromamide A

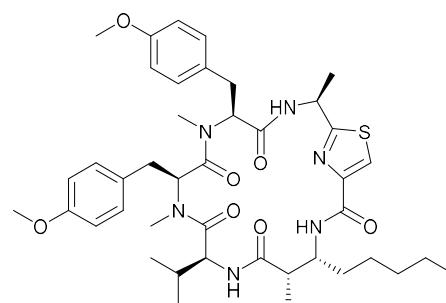

391 kakeromamide B

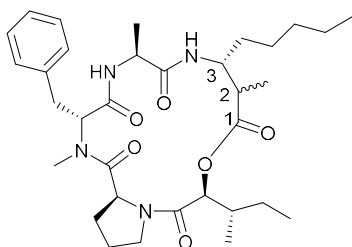392 porpoisamide A 2S  
393 porpoisamide B 2R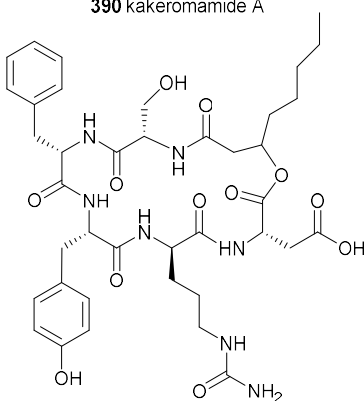

394 scytonemide B

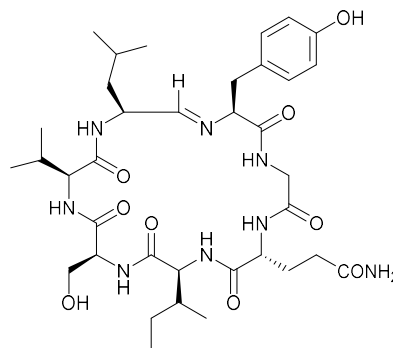

395 scytonemide A

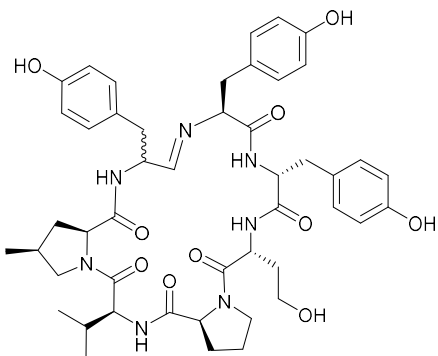

396 nostocyclopeptide M1

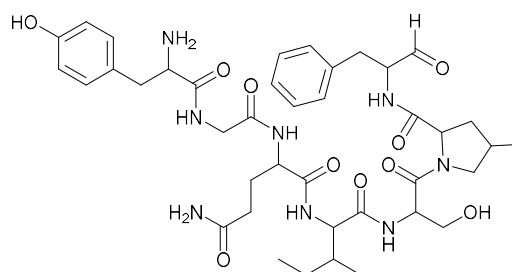

397 nostocyclopeptide Ncp-A2-L

Table S1. (continued)

| #   | Compound          | Habitat | Producing organism | DOI               |
|-----|-------------------|---------|--------------------|-------------------|
| 398 | nostoweipeptin W1 | F       | <i>Nostoc</i> sp.  | 10.1021/cb500436p |
| 399 | nostoweipeptin W2 | F       | <i>Nostoc</i> sp.  | 10.1021/cb500436p |
| 400 | nostoweipeptin W3 | F       | <i>Nostoc</i> sp.  | 10.1021/cb500436p |
| 401 | nostoweipeptin W4 | F       | <i>Nostoc</i> sp.  | 10.1021/cb500436p |
| 402 | nostoweipeptin W5 | F       | <i>Nostoc</i> sp.  | 10.1021/cb500436p |
| 403 | nostoweipeptin W6 | F       | <i>Nostoc</i> sp.  | 10.1021/cb500436p |
| 404 | nostoweipeptin W7 | F       | <i>Nostoc</i> sp.  | 10.1021/cb500436p |
| 405 | nostopeptolide L1 | F       | <i>Nostoc</i> sp.  | 10.1021/cb500436p |
| 406 | nostopeptolide L2 | F       | <i>Nostoc</i> sp.  | 10.1021/cb500436p |
| 407 | nostopeptolide L3 | F       | <i>Nostoc</i> sp.  | 10.1021/cb500436p |
| 408 | nostopeptolide L4 | F       | <i>Nostoc</i> sp.  | 10.1021/cb500436p |

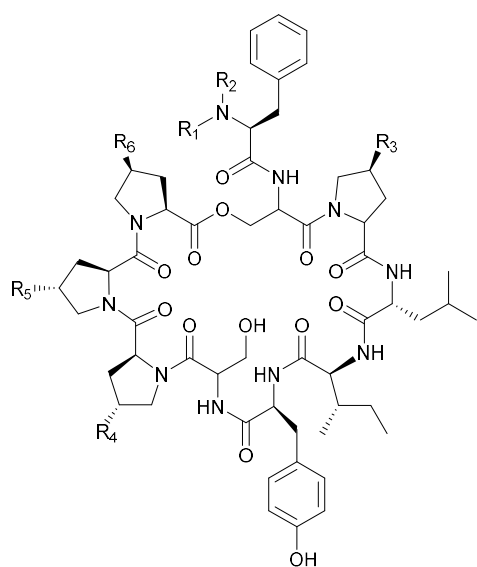

|     |                   |                                    |                                 |                                 |                    |                    |                                 |
|-----|-------------------|------------------------------------|---------------------------------|---------------------------------|--------------------|--------------------|---------------------------------|
| 398 | nostoweipeptin W1 | R <sub>1</sub> =CH <sub>3</sub> CO | R <sub>2</sub> =CH <sub>3</sub> | R <sub>3</sub> =CH <sub>3</sub> | R <sub>4</sub> =OH | R <sub>5</sub> =OH | R <sub>6</sub> =CH <sub>3</sub> |
| 399 | nostoweipeptin W2 | R <sub>1</sub> =CH <sub>3</sub> CO | R <sub>2</sub> =CH <sub>3</sub> | R <sub>3</sub> =CH <sub>3</sub> | R <sub>4</sub> =OH | R <sub>5</sub> =H  | R <sub>6</sub> =CH <sub>3</sub> |
| 400 | nostoweipeptin W3 | R <sub>1</sub> =CH <sub>3</sub> CO | R <sub>2</sub> =CH <sub>3</sub> | R <sub>3</sub> =CH <sub>3</sub> | R <sub>4</sub> =H  | R <sub>5</sub> =OH | R <sub>6</sub> =CH <sub>3</sub> |
| 401 | nostoweipeptin W4 | R <sub>1</sub> =CH <sub>3</sub> CO | R <sub>2</sub> =H               | R <sub>3</sub> =CH <sub>3</sub> | R <sub>4</sub> =OH | R <sub>5</sub> =OH | R <sub>6</sub> =CH <sub>3</sub> |
| 402 | nostoweipeptin W5 | R <sub>1</sub> =CH <sub>3</sub> CO | R <sub>2</sub> =CH <sub>3</sub> | R <sub>3</sub> =CH <sub>3</sub> | R <sub>4</sub> =OH | R <sub>5</sub> =OH | R <sub>6</sub> =H               |
| 403 | nostoweipeptin W6 | R <sub>1</sub> =CH <sub>3</sub> CO | R <sub>2</sub> =CH <sub>3</sub> | R <sub>3</sub> =H               | R <sub>4</sub> =OH | R <sub>5</sub> =OH | R <sub>6</sub> =CH <sub>3</sub> |
| 404 | nostoweipeptin W7 | R <sub>1</sub> =H                  | R <sub>2</sub> =CH <sub>3</sub> | R <sub>3</sub> =H               | R <sub>4</sub> =OH | R <sub>5</sub> =OH | R <sub>6</sub> =CH <sub>3</sub> |

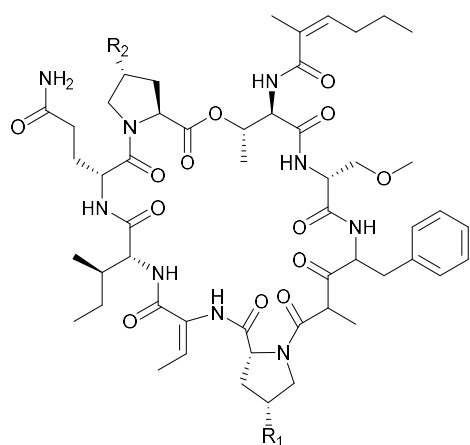

|     |                   |                                 |                    |
|-----|-------------------|---------------------------------|--------------------|
| 405 | nostopeptolide L1 | R <sub>1</sub> =CH <sub>3</sub> | R <sub>2</sub> =OH |
| 406 | nostopeptolide L2 | R <sub>1</sub> =CH <sub>3</sub> | R <sub>2</sub> =H  |
| 407 | nostopeptolide L3 | R <sub>1</sub> =H               | R <sub>2</sub> =OH |
| 408 | nostopeptolide L4 | R <sub>1</sub> =H               | R <sub>2</sub> =H  |

Table S1. (continued)

| #   | Compound                        | Habitat | Producing organism          | DOI                          |
|-----|---------------------------------|---------|-----------------------------|------------------------------|
| 409 | grassypeptolide B               | M       | <i>Lyngbya confervoides</i> | 10.1021/jo1013564            |
| 410 | grassypeptolide C               | M       | <i>Lyngbya confervoides</i> | 10.1021/jo1013564            |
| 411 | grassypeptolide D               | M       | <i>Leptolyngbya</i> sp.     | 10.1021/np200270d            |
| 412 | grassypeptolide E               | M       | <i>Leptolyngbya</i> sp.     | 10.1021/np200270d            |
| 413 | grassypeptolide F               | M       | <i>Lyngbya majuscula</i>    | 10.1021/np2005083            |
| 414 | grassypeptolide G               | M       | <i>Lyngbya majuscula</i>    | 10.1021/np2005083            |
| 415 | Ibu-epidemethoxylyngbyastatin 3 | M       | <i>Leptolyngbya</i> sp.     | 10.1021/np200270d            |
| 416 | urumamide                       | M       | <i>Okeania</i> sp.          | 10.1016/j.tetlet.2016.08.012 |
| 417 | triproamide                     | M       | <i>Symploca hydroides</i>   | 10.1021/acs.jnatprod.1c00996 |

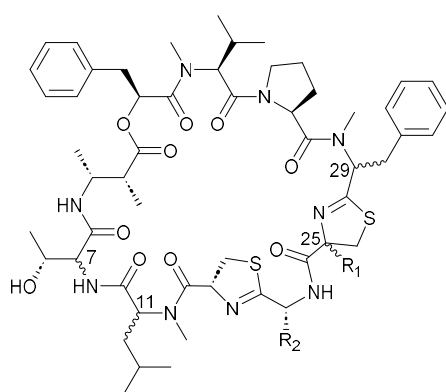

$R_1$   $R_2$   
**409** grassypeptolide B 7*R*, 11*R*, 25*R*, 29*R* H Me  
**410** grassypeptolide C 7*R*, 11*R*, 25*R*, 29*S* H Et  
**411** grassypeptolide D 7*R*, 11*R*, 25*S*, 29*S* Me Et  
**412** grassypeptolide E 7*S*, 11*S*, 25*S*, 29*S* Me Et

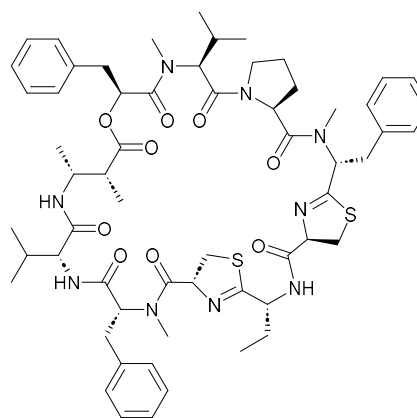

**413** grassypeptolide F R = CH<sub>2</sub>CH<sub>3</sub>  
**414** grassypeptolide G R = CH<sub>3</sub>

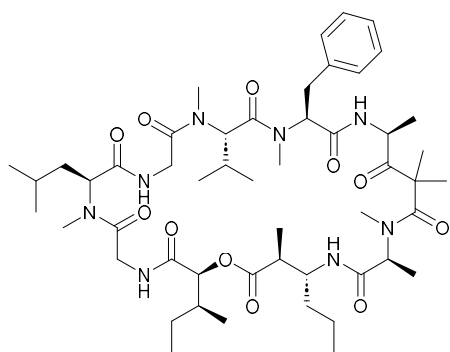

**415** Ibu-epidemethoxylyngbyastatin 3

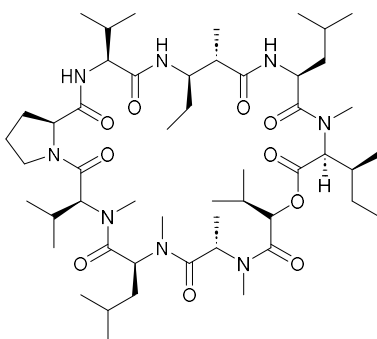

**416** urumamide

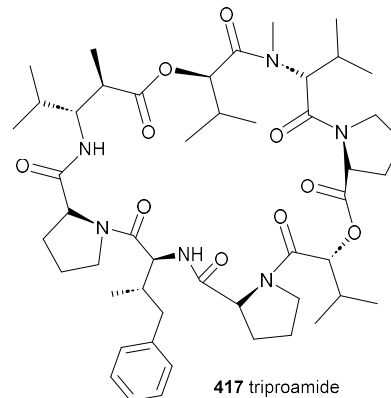

**417** triproamide

Table S1. (continued)

| #   | Compound           | Habitat | Producing organism          | DOI                          |
|-----|--------------------|---------|-----------------------------|------------------------------|
| 418 | muscotoxin A       | F       | <i>Desmonostoc muscorum</i> | 10.1021/tx500382b            |
| 419 | muscotoxin B       | F       | <i>Desmonostoc muscorum</i> | 10.1021/tx500382b            |
| 420 | desmamide A        | F       | <i>Desmonostoc muscorum</i> | 10.1021/acs.jnatprod.2c00162 |
| 421 | desmamide B        | F       | <i>Desmonostoc muscorum</i> | 10.1021/acs.jnatprod.2c00162 |
| 422 | desmamide C        | F       | <i>Desmonostoc muscorum</i> | 10.1021/acs.jnatprod.2c00162 |
| 423 | lyngbyacyclamide A | M       | <i>Lyngbya</i> sp.          | 10.1016/j.tetlet.2010.06.105 |
| 424 | lyngbyacyclamide B | M       | <i>Lyngbya</i> sp.          | 10.1016/j.tetlet.2010.06.105 |

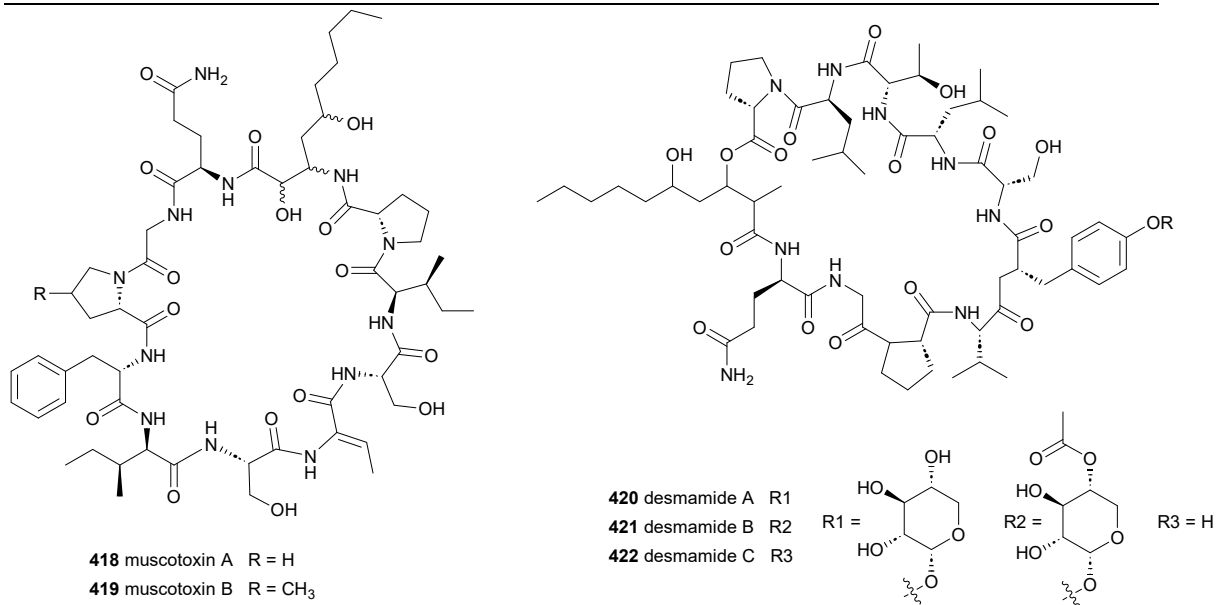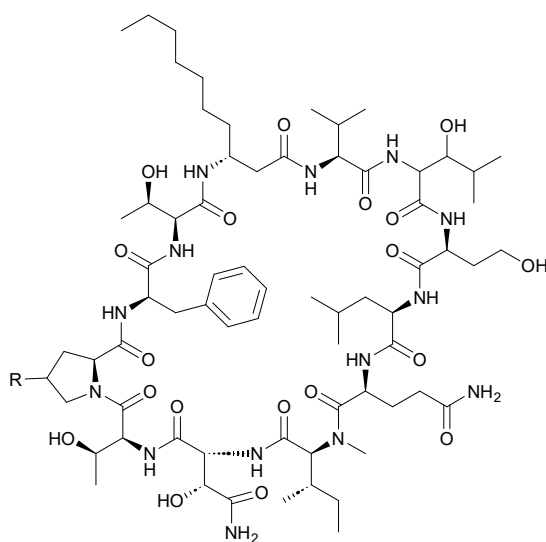



Table S1. (continued)

| #   | Compound        | Habitat | Producing organism          | DOI                       |
|-----|-----------------|---------|-----------------------------|---------------------------|
| 425 | trichormamide A | F       | <i>Trichormus</i> sp.       | 10.1021/np5003548         |
| 426 | trichormamide B | F       | <i>Trichormus</i> sp.       | 10.1021/np5003548         |
| 427 | trichormamide C | F       | cf. <i>Oscillatoria</i> sp. | 10.1016/j.bmc.2015.04.073 |
| 428 | trichormamide D | F       | cf. <i>Oscillatoria</i> sp. | 10.1016/j.bmc.2015.04.073 |

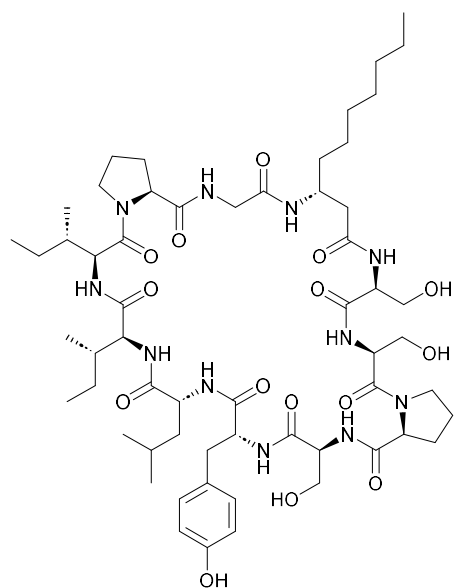

425 trichormamide A

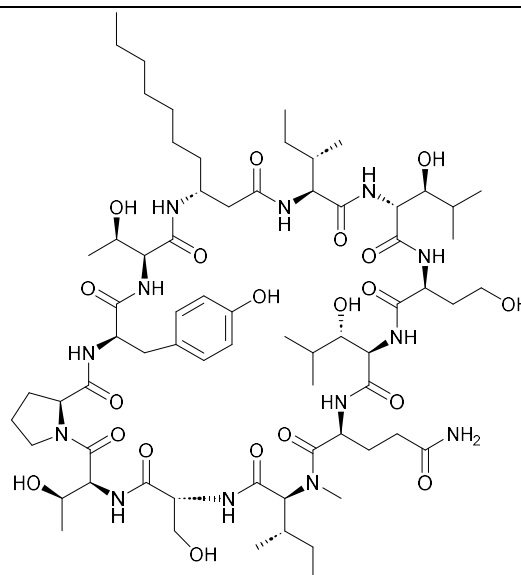

426 trichormamide B

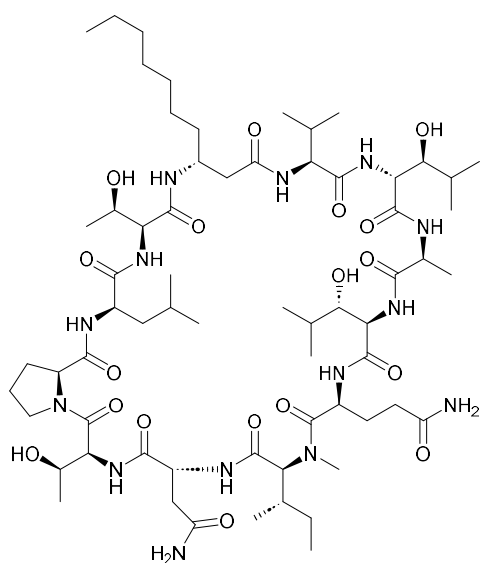

427 trichormamide C

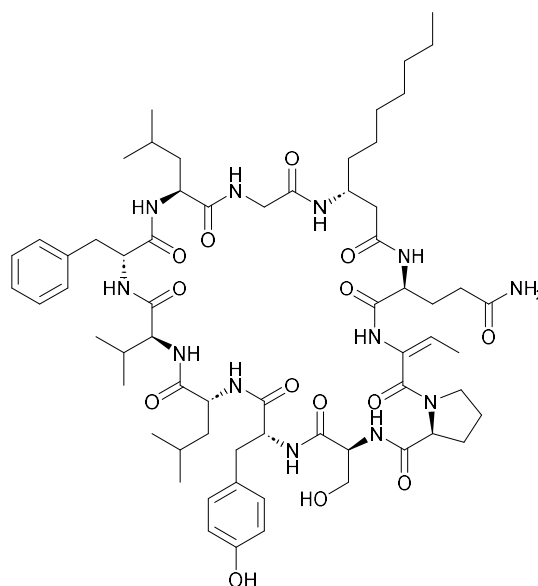

428 trichormamide D

Table S1. (continued)

| #   | Compound      | Habitat | Producing organism                              | DOI                       |
|-----|---------------|---------|-------------------------------------------------|---------------------------|
| 429 | laxaphycin B4 | M       | <i>Hormothamnion</i><br><i>enteromorphoides</i> | 10.1016/j.bmc.2018.03.022 |
| 430 | laxaphycin A2 | M       | <i>Hormothamnion</i><br><i>enteromorphoides</i> | 10.1016/j.bmc.2018.03.022 |
| 431 | laxaphycin B5 | F       | <i>Phormidium</i> sp.                           | 10.1038/s41429-020-0301-x |
| 432 | laxaphycin B6 | F       | <i>Phormidium</i> sp.                           | 10.1038/s41429-020-0301-x |

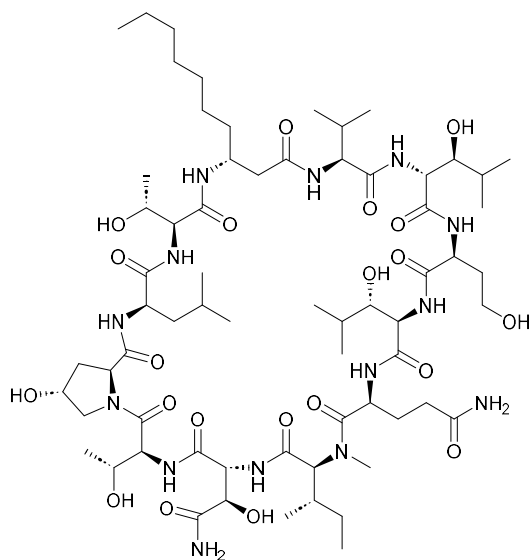

429 laxaphycin B4

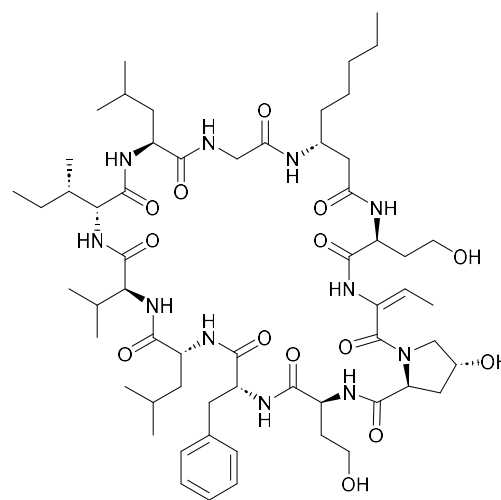

430 laxaphycin A2

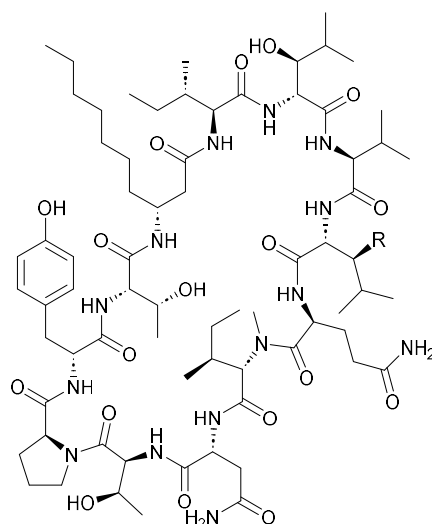

431 laxaphycin B5 R = OH

432 laxaphycin B6 R = H

Table S1. (continued)

| #   | Compound            | Habitat | Producing organism                  | DOI                       |
|-----|---------------------|---------|-------------------------------------|---------------------------|
| 433 | heinamide A1        | F       | <i>Nostoc</i> sp.                   | 10.1039/D1OB00772F        |
| 434 | heinamide A2        | F       | <i>Nostoc</i> sp.                   | 10.1039/D1OB00772F        |
| 435 | heinamide A3        | F       | <i>Nostoc</i> sp.                   | 10.1039/D1OB00772F        |
| 436 | heinamide B1        | F       | <i>Nostoc</i> sp.                   | 10.1039/D1OB00772F        |
| 437 | heinamide B2        | F       | <i>Nostoc</i> sp.                   | 10.1039/D1OB00772F        |
| 438 | heinamide B3        | F       | <i>Nostoc</i> sp.                   | 10.1039/D1OB00772F        |
| 439 | heinamide B4        | F       | <i>Nostoc</i> sp.                   | 10.1039/D1OB00772F        |
| 440 | heinamide B5        | F       | <i>Nostoc</i> sp.                   | 10.1039/D1OB00772F        |
| 441 | acyclolaxaphycin B  | M       | <i>Anabaena</i> cf. <i>torulosa</i> | 10.3390/md13127065        |
| 442 | acyclolaxaphycin B3 | M       | <i>Anabaena</i> cf. <i>torulosa</i> | 10.3390/md13127065        |
| 443 | acyclolaxaphycin A  | M       | <i>Anabaena torulosa</i>            | 10.1016/j.bmc.2019.03.046 |

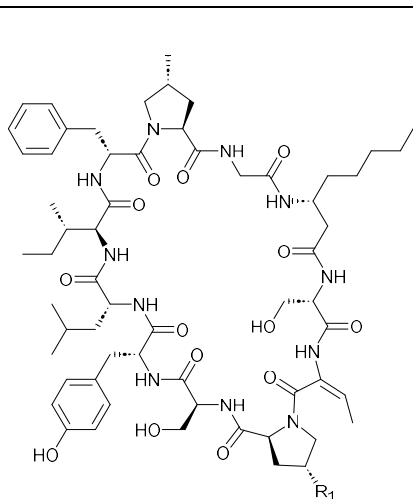

$R_1$   $R_2$   
**433** heinamide A1 OH OH  
**434** heinamide A2 H OH  
**435** heinamide A3 H H

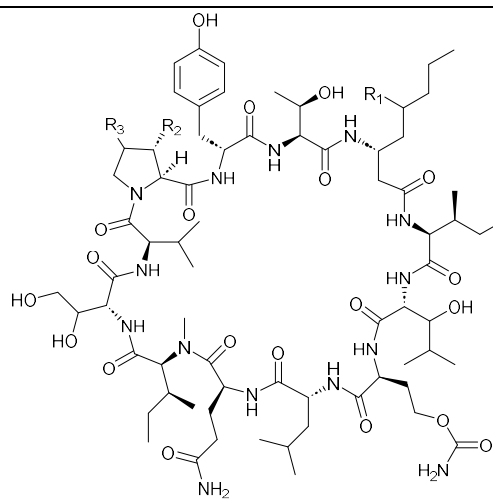

$R_1$   $R_2$   $R_3$   
**436** heinamide B1 OH OH CH<sub>3</sub>  
**437** heinamide B2 OH H H  
**438** heinamide B3 H H H  
**439** heinamide B4 H OH CH<sub>3</sub>  
**440** heinamide B5 OH H CH<sub>3</sub>

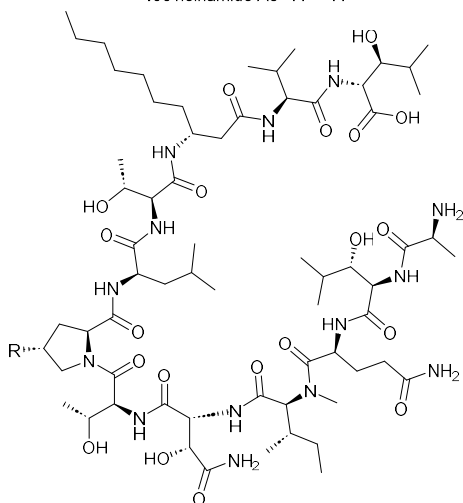

**441** acyclolaxaphycin B R = H [(2S)-Pro]  
**442** acyclolaxaphycin B3 R = OH [(2S, 4R)-Pro]

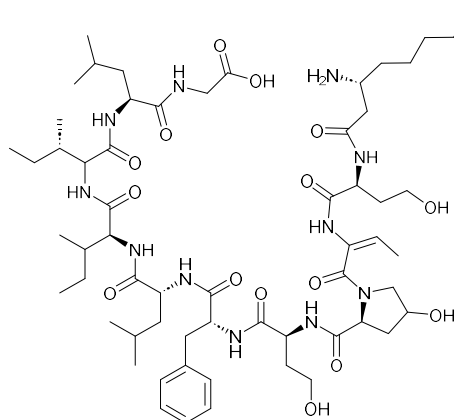

**443** acyclolaxaphycin A

Table S1. (continued)

| #   | Compound                              | Habitat | Producing organism       | DOI                       |
|-----|---------------------------------------|---------|--------------------------|---------------------------|
| 444 | [des-Gly11]acyclolaxaphycin A         | M       | <i>Anabaena torulosa</i> | 10.1016/j.bmc.2019.03.046 |
| 445 | [des-(Leu10-Gly11)]acyclolaxaphycin A | M       | <i>Anabaena torulosa</i> | 10.1016/j.bmc.2019.03.046 |
| 446 | [L-Val8] laxaphycin A                 | M       | <i>Anabaena torulosa</i> | 10.1016/j.bmc.2019.03.046 |
| 447 | [D-Val9] laxaphycin A                 | M       | <i>Anabaena torulosa</i> | 10.1016/j.bmc.2019.03.046 |

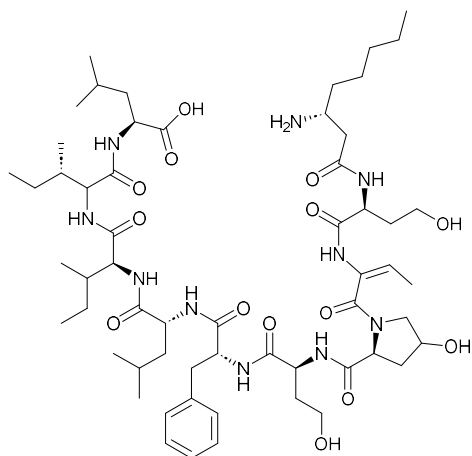

444 [des-Gly11]acyclolaxaphycin A

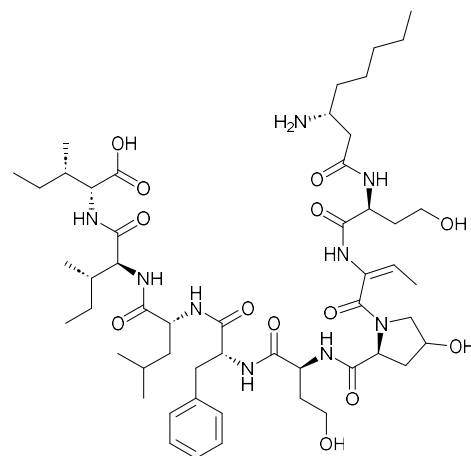

445 [des-(Leu10-Gly11)]acyclolaxaphycin A

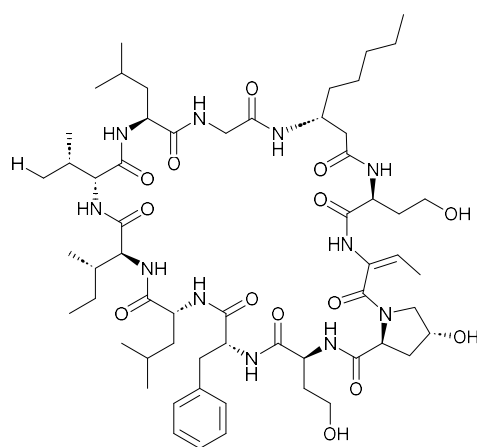

446 [L-Val8]laxaphycin A

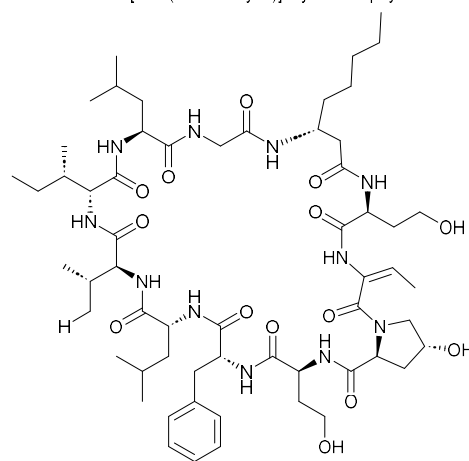

447 [D-Val9]laxaphycin A

Table S1. (continued)

| #   | Compound        | Habitat | Producing organism          | DOI                       |
|-----|-----------------|---------|-----------------------------|---------------------------|
| 448 | minutissamide A | F       | <i>Anabaena minutissima</i> | 10.1021/np2002226         |
| 449 | minutissamide B | F       | <i>Anabaena minutissima</i> | 10.1021/np2002226         |
| 450 | minutissamide C | F       | <i>Anabaena minutissima</i> | 10.1021/np2002226         |
| 451 | minutissamide D | F       | <i>Anabaena minutissima</i> | 10.1021/np2002226         |
| 452 | minutissamide E | F       | cf. <i>Anabaena</i> sp.     | 10.1016/j.bmc.2012.08.017 |
| 453 | minutissamide F | F       | cf. <i>Anabaena</i> sp.     | 10.1016/j.bmc.2012.08.017 |
| 454 | minutissamide G | F       | cf. <i>Anabaena</i> sp.     | 10.1016/j.bmc.2012.08.017 |
| 455 | minutissamide H | F       | cf. <i>Anabaena</i> sp.     | 10.1016/j.bmc.2012.08.017 |
| 456 | minutissamide I | F       | cf. <i>Anabaena</i> sp.     | 10.1016/j.bmc.2012.08.017 |
| 457 | minutissamide J | F       | cf. <i>Anabaena</i> sp.     | 10.1016/j.bmc.2012.08.017 |
| 458 | minutissamide K | F       | cf. <i>Anabaena</i> sp.     | 10.1016/j.bmc.2012.08.017 |
| 459 | minutissamide L | F       | cf. <i>Anabaena</i> sp.     | 10.1016/j.bmc.2012.08.017 |

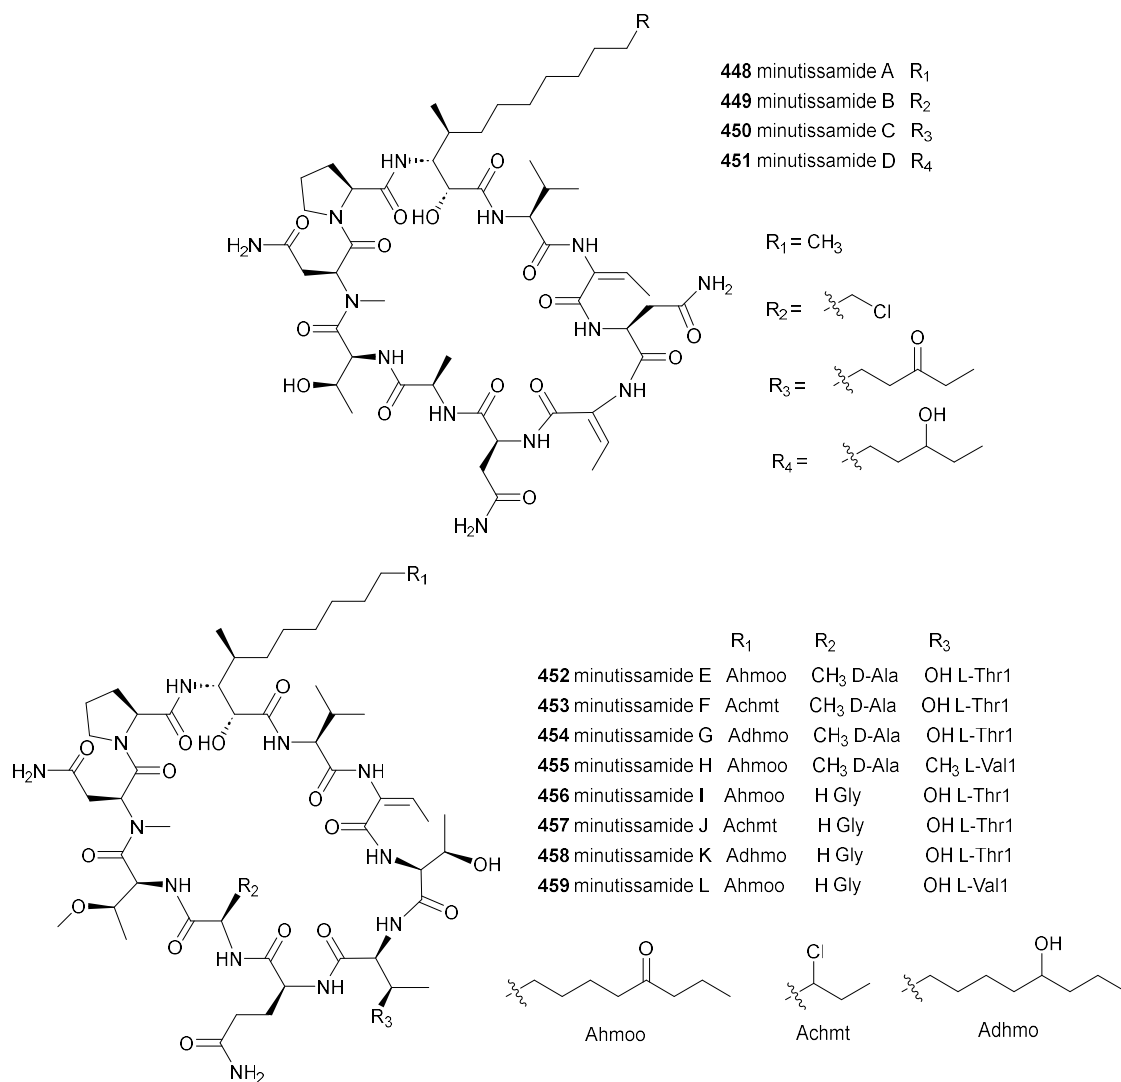

Table S1. (continued)

| #   | Compound                | Habitat | Producing organism                 | DOI                          |
|-----|-------------------------|---------|------------------------------------|------------------------------|
| 460 | puwainaphycin F (Puw F) | F       | <i>Cylindrospermum alatosporum</i> | 10.1021/tx300044t            |
| 461 | puwainaphycin G (Puw G) | F       | <i>Cylindrospermum alatosporum</i> | 10.1021/tx300044t            |
| 462 | 4-methyl-Ahdoa Puw F    | F       | <i>Cylindrospermum alatosporum</i> | 10.1371/journal.pone.0111904 |
| 463 | 4-methyl-Ahdoa Puw-G    | F       | <i>Cylindrospermum alatosporum</i> | 10.1371/journal.pone.0111904 |

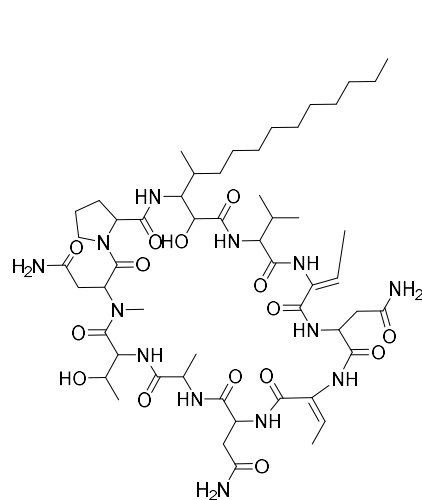

460 puwainaphycin F (Puw F)

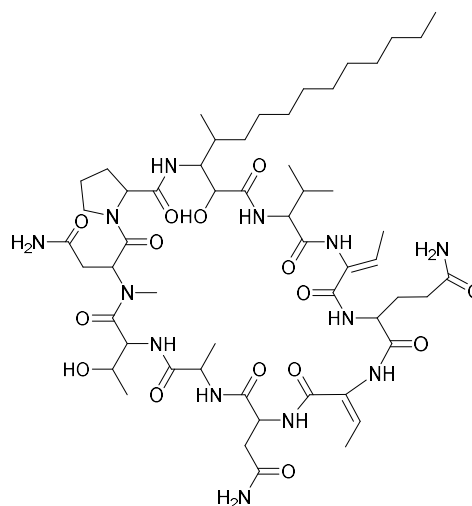

461 puwainaphycin G (Puw G)

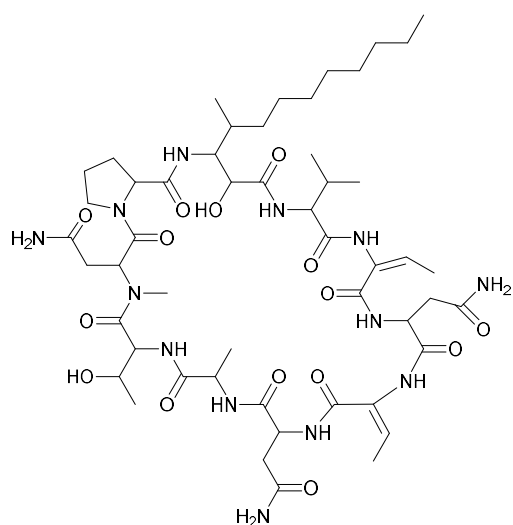

462 4-methyl-Ahdoa-Puw-F

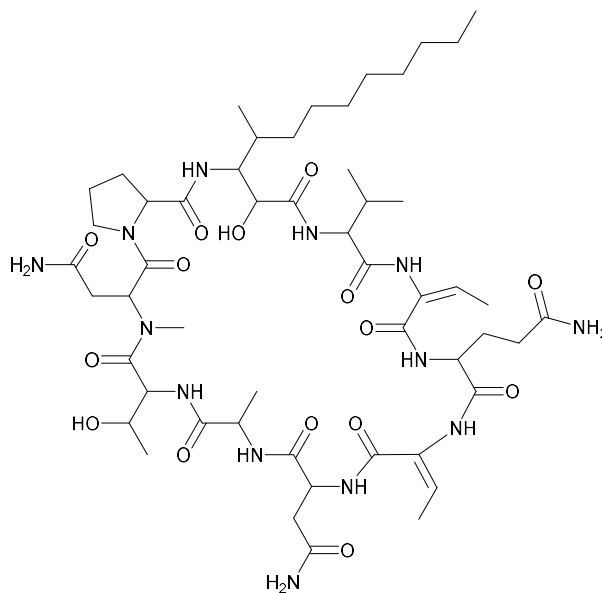

463 4-methyl-Ahdoa-Puw-G

Table S1. (continued)

| #   | Compound             | Habitat | Producing organism                 | DOI                          |
|-----|----------------------|---------|------------------------------------|------------------------------|
| 464 | 4-methyl-Ahdea Puw F | F       | <i>Cylindrospermum alatosporum</i> | 10.1016/j.chroma.2016.02.013 |
| 465 | 4-methyl-Ahdea Puw G | F       | <i>Cylindrospermum alatosporum</i> | 10.1016/j.chroma.2016.02.013 |
| 466 | 4-methyl-Ahuda Puw F | F       | <i>Cylindrospermum alatosporum</i> | 10.1016/j.chroma.2016.02.013 |
| 467 | 4-methyl-Ahuda Puw G | F       | <i>Cylindrospermum alatosporum</i> | 10.1016/j.chroma.2016.02.013 |

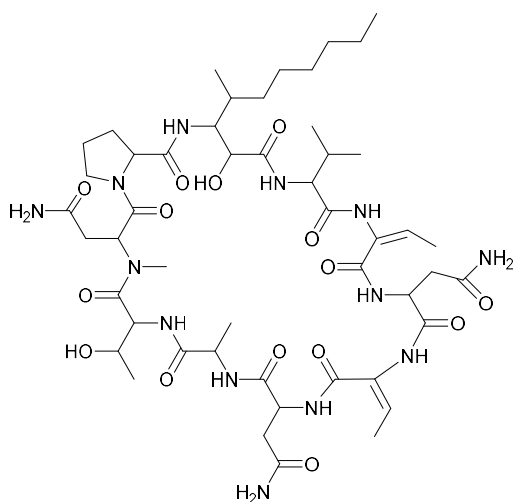

464 4-methyl-Ahdea-Puw-F

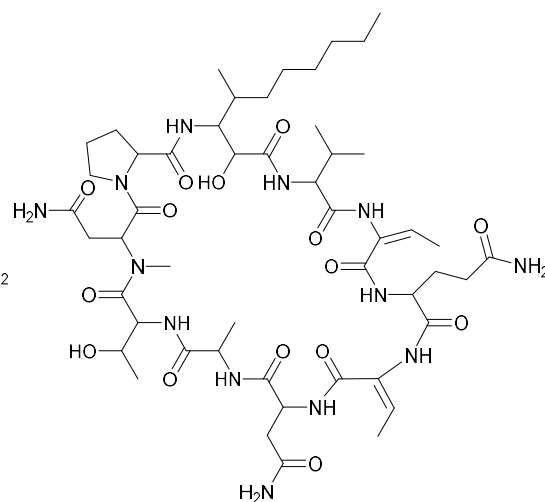

465 4-methyl-Ahdea-Puw-G

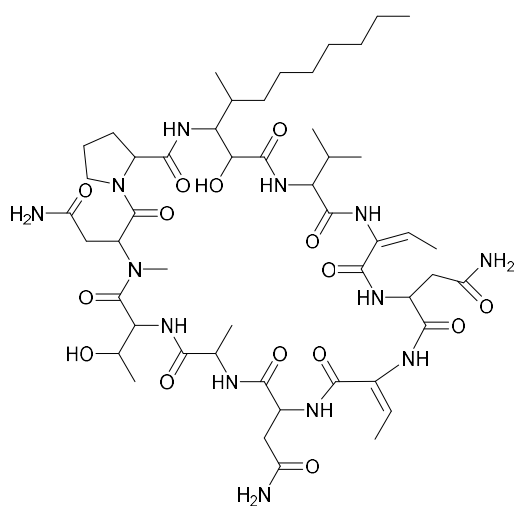

466 4-methyl-Ahuda-Puw-F

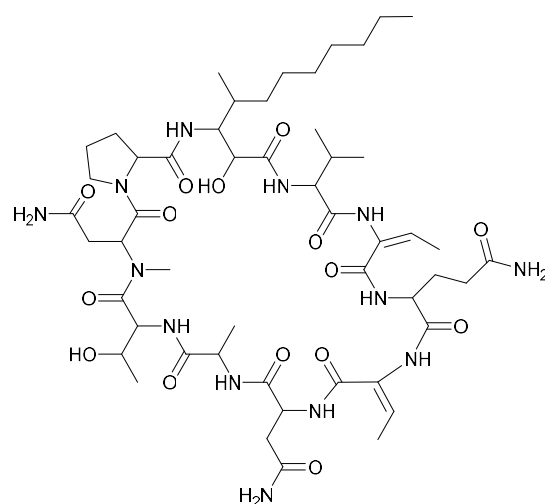

467 4-methyl-Ahuda-Puw-G

Table S1. (continued)

| #   | Compound                        | Habitat | Producing organism                 | DOI                          |
|-----|---------------------------------|---------|------------------------------------|------------------------------|
| 468 | 4-methyl-Ahhda Puw F            | F       | <i>Cylindrospermum alatosporum</i> | 10.1016/j.chroma.2016.02.013 |
| 469 | 4-methyl-Ahhda Puw G            | F       | <i>Cylindrospermum alatosporum</i> | 10.1016/j.chroma.2016.02.013 |
| 470 | 4-methyl-Ahhea Puw F            | F       | <i>Cylindrospermum alatosporum</i> | 10.1016/j.chroma.2016.02.013 |
| 471 | 12-hydroxy-4-methyl-Ahtea Puw F | F       | <i>Cylindrospermum alatosporum</i> | 10.1007/s00216-016-0066-z    |

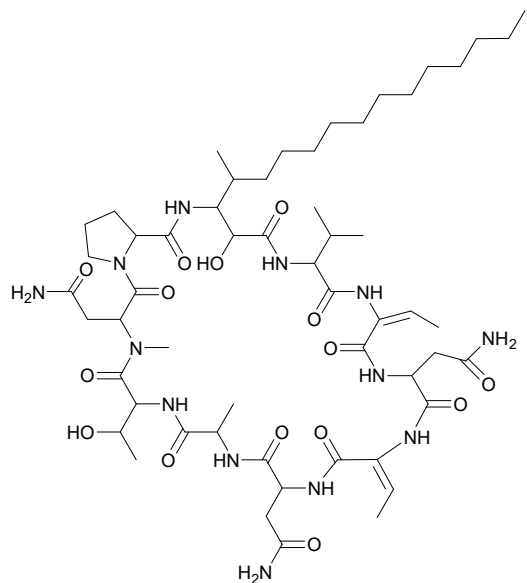

468 4-methyl-Ahhda-Puw-F

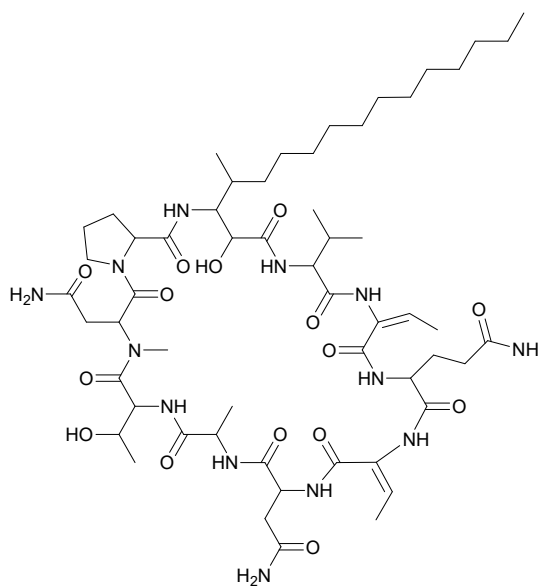

469 4-methyl-Ahhda-Puw-G

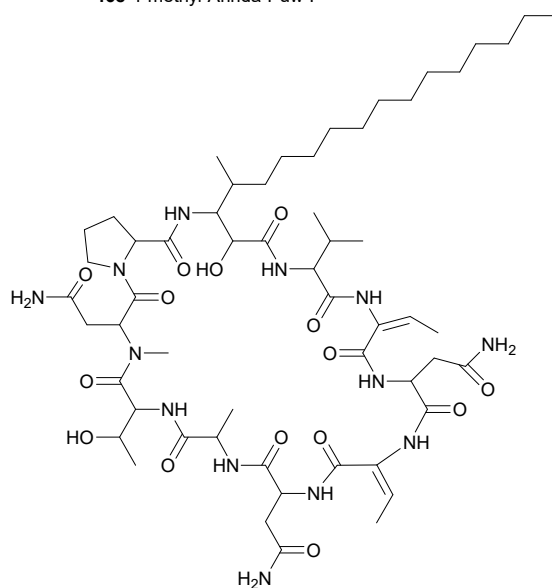

470 4-methyl-Ahhea-Puw-F

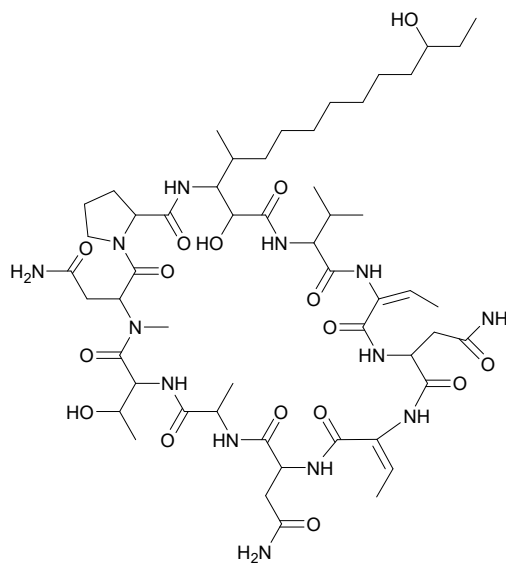

471 12-hydroxy-4-methyl-Ahtea Puw F



Table S1. (continued)

| #   | Compound                       | Habitat | Producing organism                 | DOI                       |
|-----|--------------------------------|---------|------------------------------------|---------------------------|
| 472 | 11-chloro-4-methyl-Ahdoa Puw F | F       | <i>Cylindrospermum alatosporum</i> | 10.1007/s00216-016-0066-z |
| 473 | 12-chloro-4-methyl-Ahtea Puw F | F       | <i>Cylindrospermum alatosporum</i> | 10.1007/s00216-016-0066-z |
| 474 | puwainaphycin H                | F       | <i>Nodularia harveyana</i>         | 10.1021/acsomega.1c07160  |
| 475 | puwainaphycin I                | F       | <i>Nodularia harveyana</i>         | 10.1021/acsomega.1c07160  |

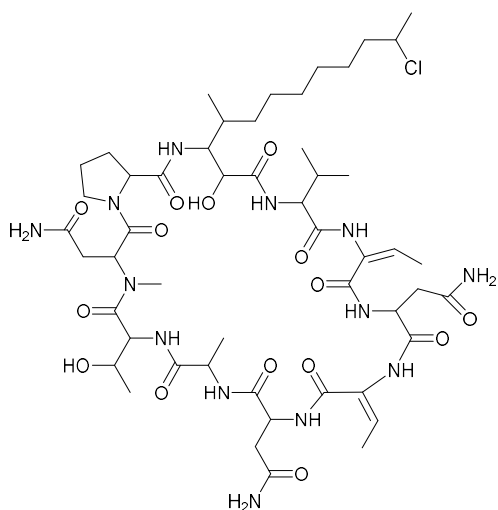

472 11-chloro-4-methyl-Ahdoa Puw F

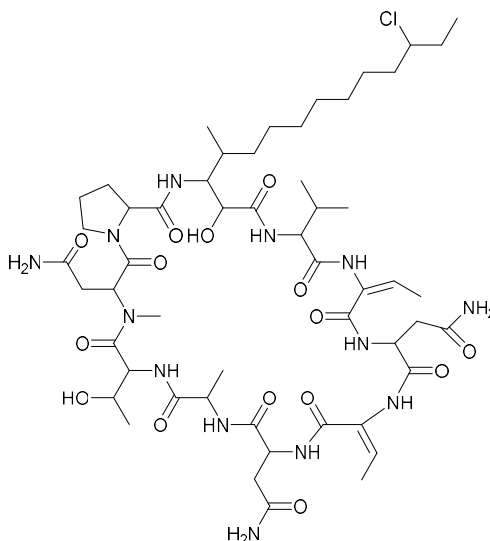

473 12-chloro-4-methyl-Ahtea Puw F

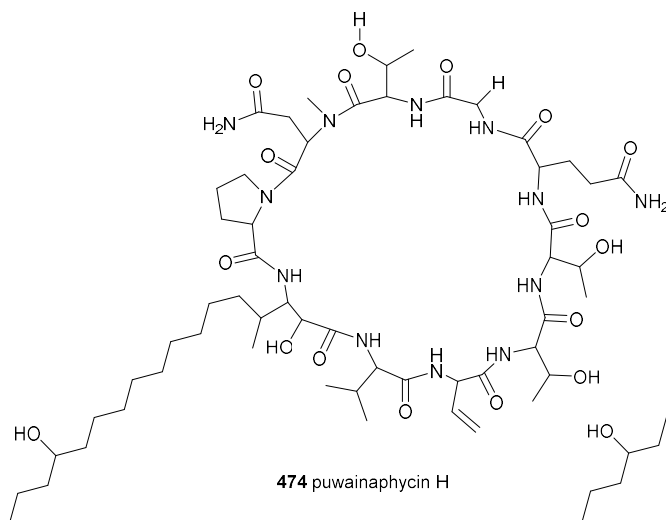

474 puwainaphycin H

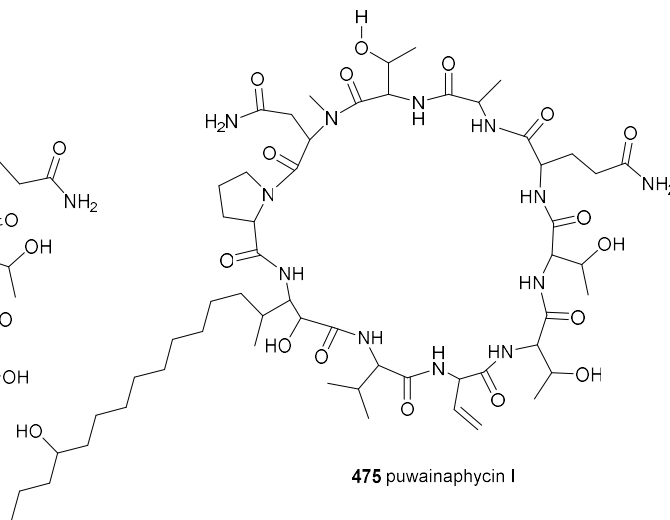

475 puwainaphycin I

Table S1. (continued)

| #   | Compound        | Habitat | Producing organism         | DOI                      |
|-----|-----------------|---------|----------------------------|--------------------------|
| 476 | puwainaphycin J | F       | <i>Nodularia harveyana</i> | 10.1021/acsomega.1c07160 |
| 477 | puwainaphycin K | F       | <i>Nodularia harveyana</i> | 10.1021/acsomega.1c07160 |
| 478 | puwainaphycin L | F       | <i>Nodularia harveyana</i> | 10.1021/acsomega.1c07160 |

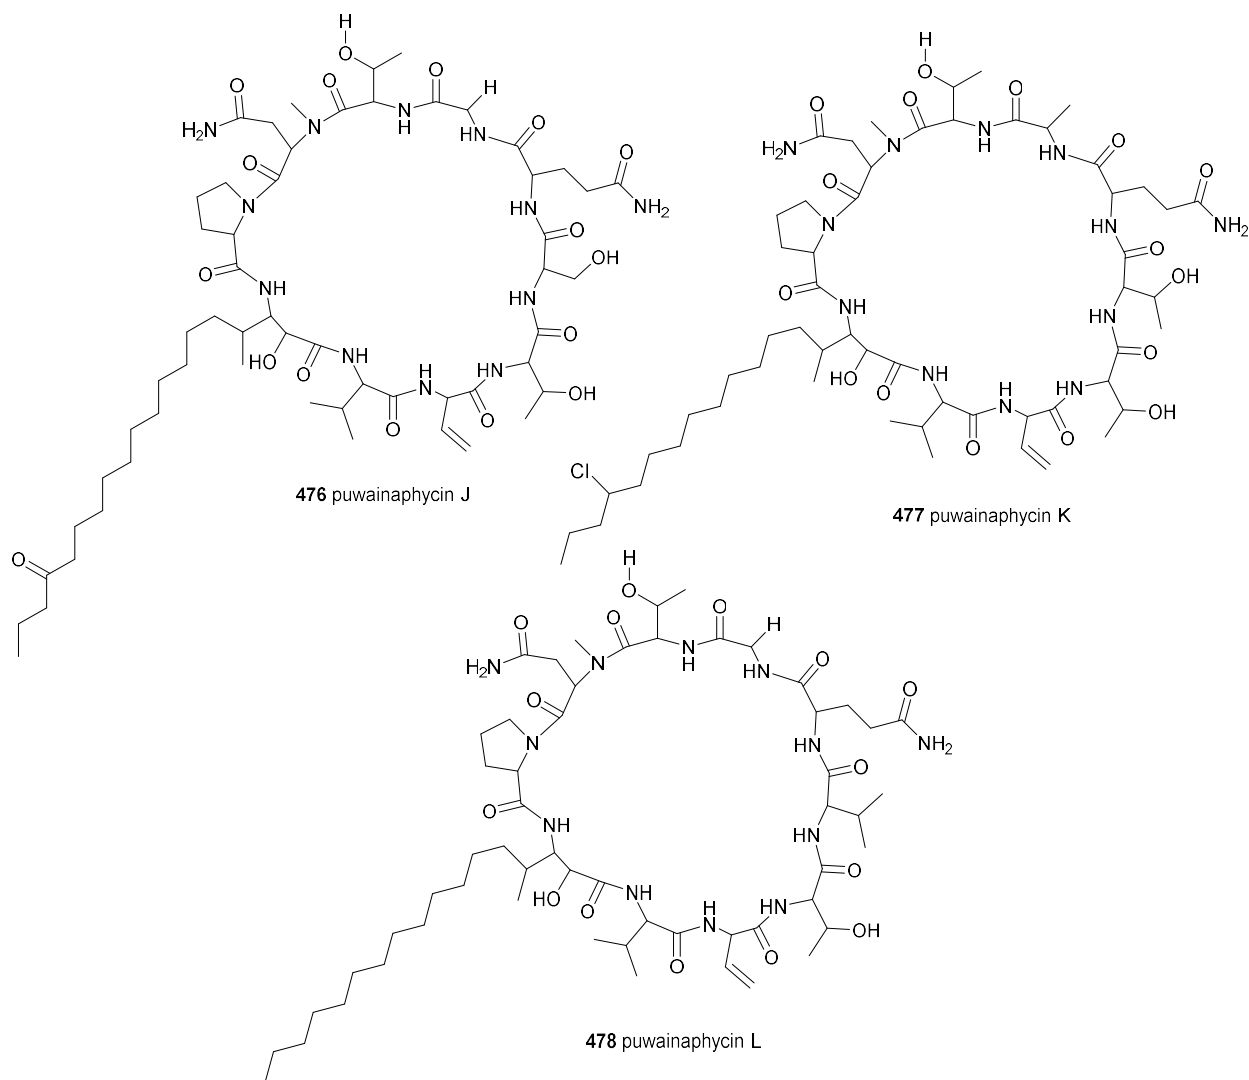

Table S1. (continued)

| #   | Compound        | Habitat | Producing organism              | DOI                          |
|-----|-----------------|---------|---------------------------------|------------------------------|
| 479 | unnarmicin D    | M       | <i>Trichodesmium thiebautii</i> | 10.3390/md15070206           |
| 480 | anabaenolysin A | M       | <i>Anabaena</i> sp.             | 10.1371/journal.pone.0041222 |
| 481 | anabaenolysin B | M       | <i>Anabaena</i> sp.             | 10.1371/journal.pone.0041222 |
| 482 | hassallidin C   | F       | <i>Anabaena</i> sp.             | 10.1073/pnas.1320913111      |

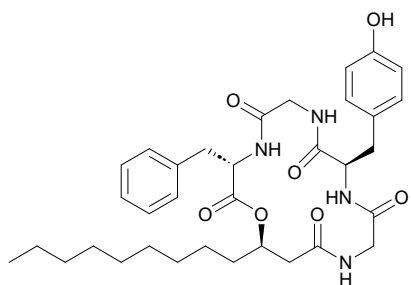

479 unnarmicin D

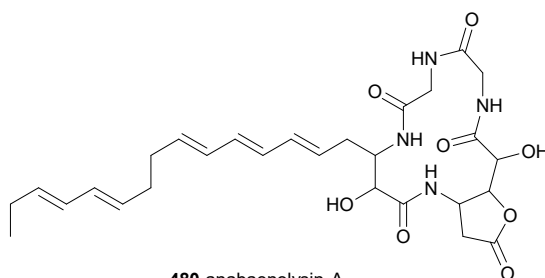

480 anabaenolysin A

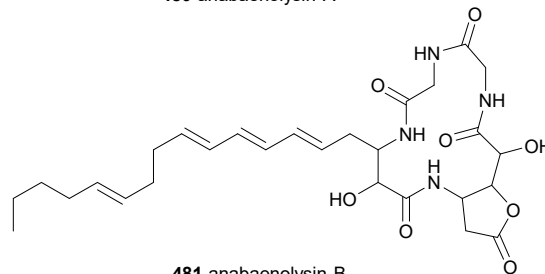

481 anabaenolysin B

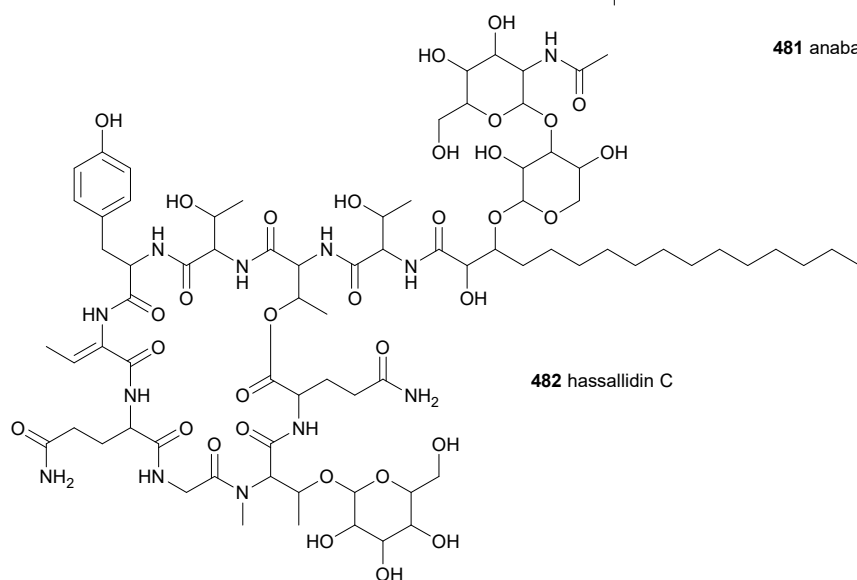

482 hassallidin C

Table S1. (continued)

| #   | Compound      | Habitat | Producing organism        | DOI                        |
|-----|---------------|---------|---------------------------|----------------------------|
| 483 | hassallidin D | F       | <i>Anabaena</i> sp.       | 10.1073/pnas.1320913111    |
| 484 | hassallidin E | F       | <i>Planktothrix sarta</i> | 10.1021/acschembio.7b00093 |

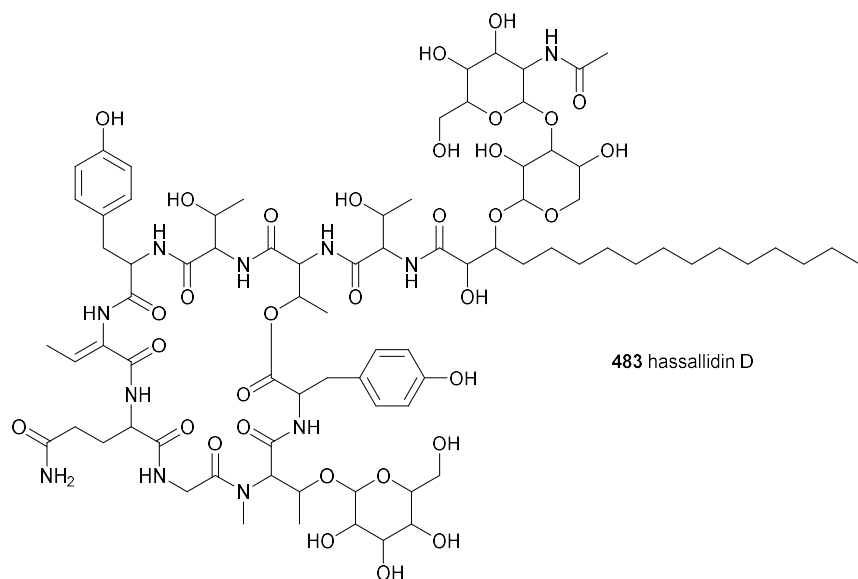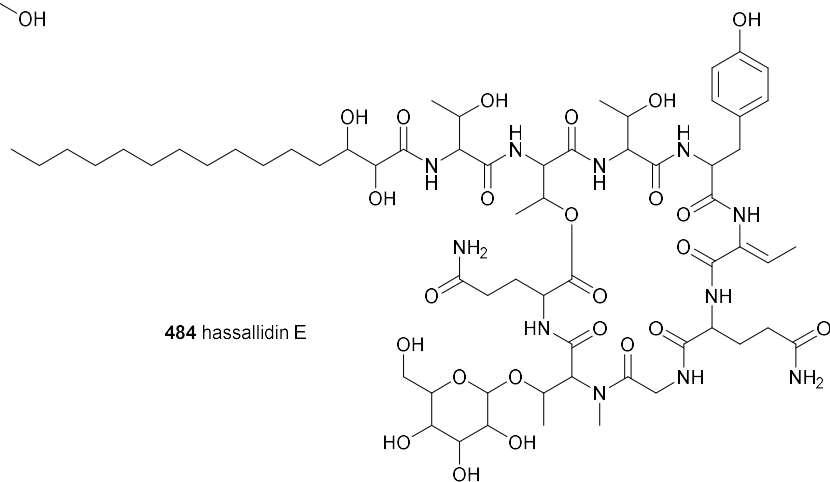

Table S1. (continued)

| #   | Compound     | Habitat | Producing organism         | DOI               |
|-----|--------------|---------|----------------------------|-------------------|
| 485 | balticidin A | B       | <i>Anabaena cylindrica</i> | 10.1021/np401020a |
| 486 | balticidin B | B       | <i>Anabaena cylindrica</i> | 10.1021/np401020a |
| 487 | balticidin C | B       | <i>Anabaena cylindrica</i> | 10.1021/np401020a |
| 488 | balticidin D | B       | <i>Anabaena cylindrica</i> | 10.1021/np401020a |

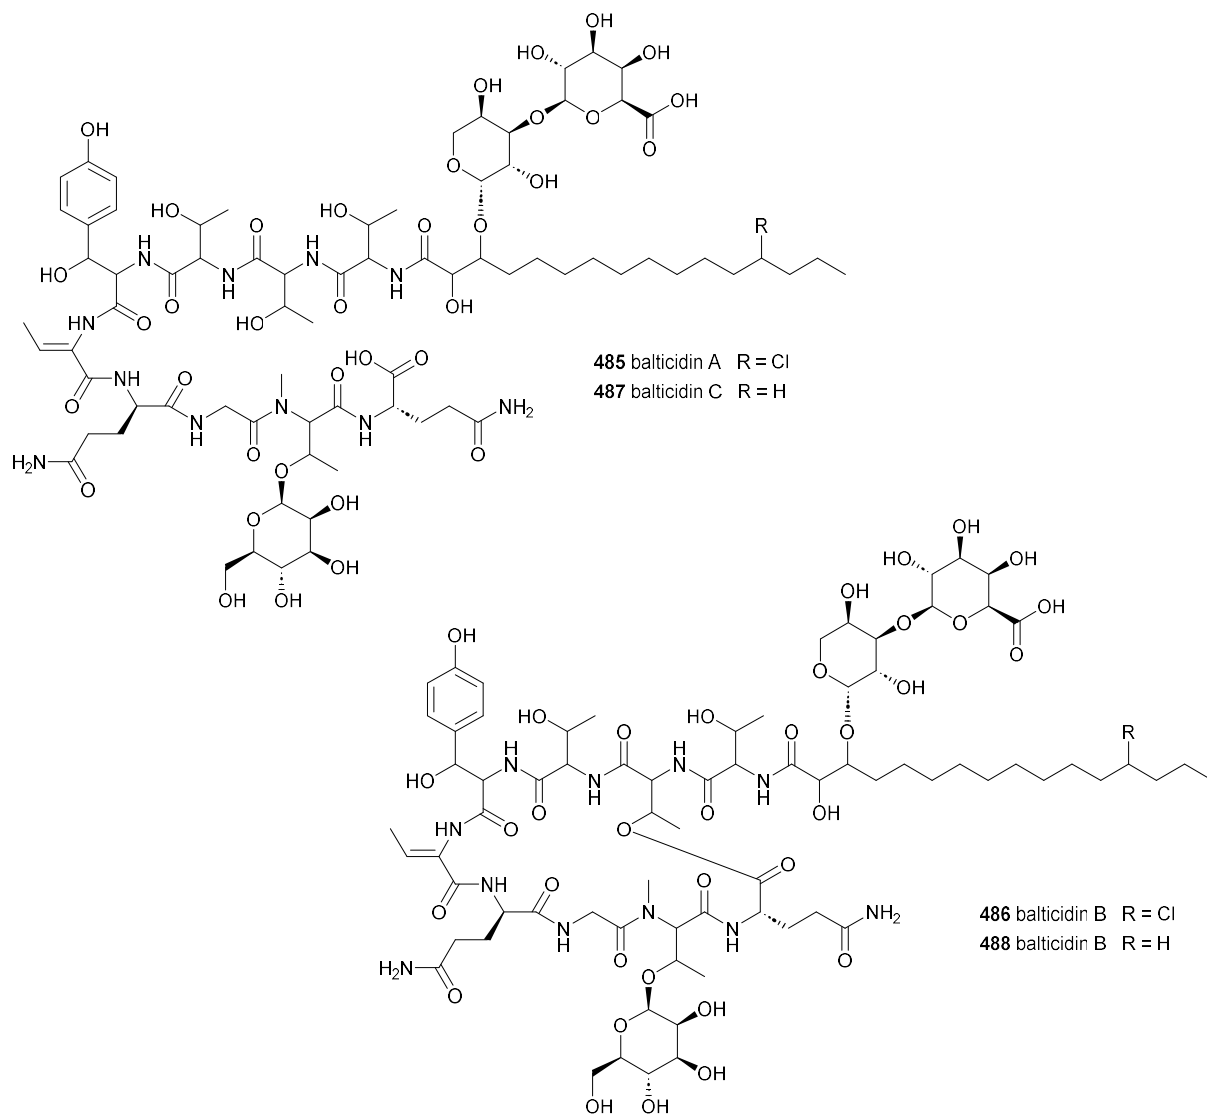

Table S1. (continued)

| #   | Compound                | Habitat | Producing organism        | DOI                    |
|-----|-------------------------|---------|---------------------------|------------------------|
| 489 | 27-deoxylyngbyabellin A | M       | <i>Lyngbya bouillonii</i> | 10.1021/np1004032      |
| 490 | lyngbyabellin J         | M       | <i>Lyngbya bouillonii</i> | 10.1021/np1004032      |
| 491 | lyngbyabellin K         | M       | <i>Moorea bouillonii</i>  | 10.1002/ejoc.201200691 |
| 492 | lyngbyabellin L         | M       | <i>Moorea bouillonii</i>  | 10.1002/ejoc.201200691 |
| 493 | lyngbyabellin M         | M       | <i>Moorea bouillonii</i>  | 10.1002/ejoc.201200691 |
| 494 | lyngbyabellin N         | M       | <i>Moorea bouillonii</i>  | 10.1002/ejoc.201200691 |
| 495 | 7-epi-lyngbyabellin L   | M       | <i>Moorea bouillonii</i>  | 10.1002/ejoc.201200691 |

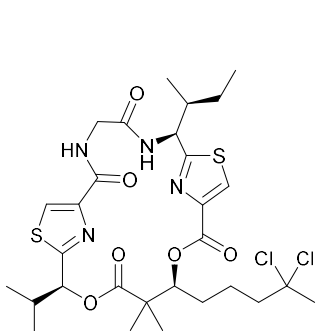

489 27-deoxylyngbyabellin A

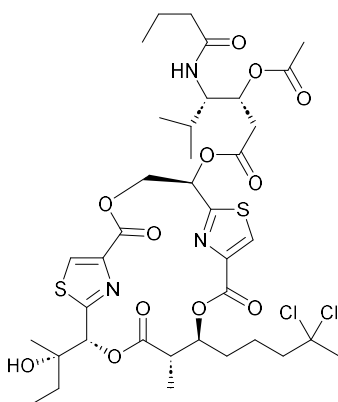

490 lyngbyabellin J

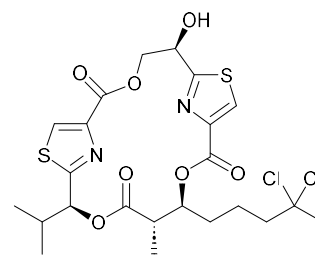

491 lyngbyabellin K

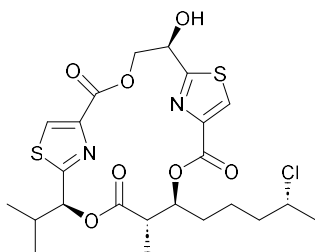

492 lyngbyabellin L

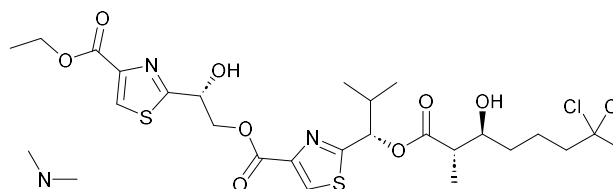

493 lyngbyabellin M

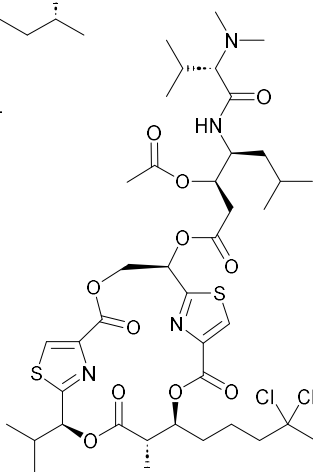

494 lyngbyabellin N

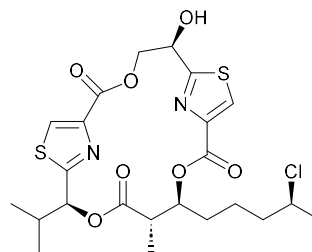

495 7-epi-lyngbyabellin L

Table S1. (continued)

| #    | Compound        | Habitat | Producing organism                                                  | DOI                          |
|------|-----------------|---------|---------------------------------------------------------------------|------------------------------|
| 496  | lyngbyabellin O | M       | <i>Okeania</i> sp.                                                  | 10.1021/acs.jnatprod.7b00449 |
| 497  | lyngbyabellin P | M       | <i>Okeania</i> sp.                                                  | 10.1021/acs.jnatprod.7b00449 |
| 498* | hoiamide B      | M       | <i>Symploca</i> sp. and cf.<br><i>Oscillatoria</i> sp. (assemblage) | 10.1021/np100468n            |
| 499  | hoiamide C      | M       | <i>Symploca</i> sp.                                                 | 10.1021/np100468n            |
| 500  | hoiamide D      | M       | <i>Symploca</i> sp.                                                 | 10.1016/j.bmcl.2011.10.054   |
| 501  | bouillonamide   | M       | <i>Moorea bouillonii</i>                                            | 10.3390/md11083015           |
| 502  | alotamide B     | M       | <i>Moorena</i> sp.                                                  | 10.1246/cl.230035            |

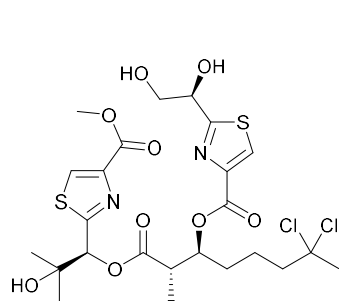

496 lyngbyabellin O

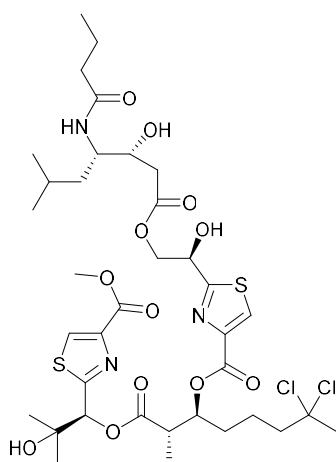

497 lyngbyabellin P

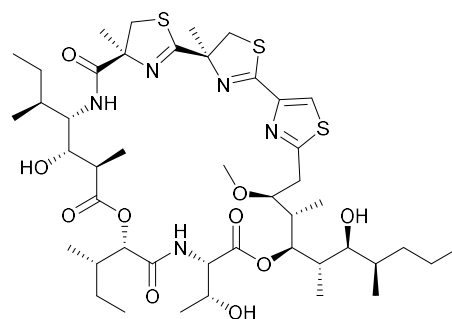

498\* hoiamide B

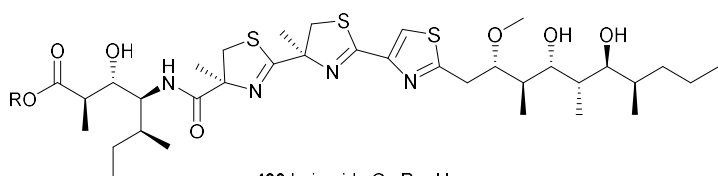

499 hoiamide C R = H

500 hoiamide D R = CH<sub>2</sub>CH<sub>3</sub>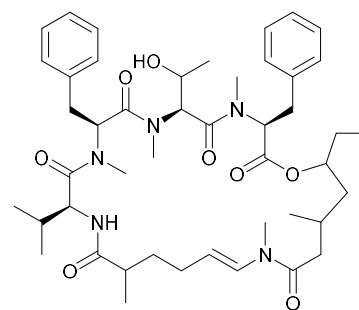

501 bouillonamide

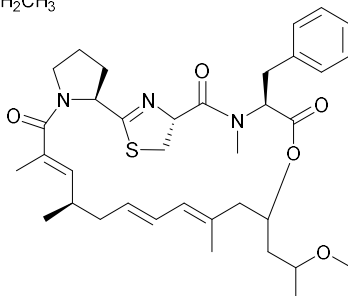

502 alotamide B

Table S1. (continued)

| #   | Compound      | Habitat | Producing organism                                           | DOI                             |
|-----|---------------|---------|--------------------------------------------------------------|---------------------------------|
| 503 | lagunamide A  | M       | <i>Lyngbya majuscula</i>                                     | 10.1021/np100442x               |
| 504 | lagunamide B  | M       | <i>Lyngbya majuscula</i>                                     | 10.1021/np100442x               |
| 505 | lagunamide C  | M       | <i>Lyngbya majuscula</i>                                     | 10.1016/j.phytochem.2011.08.019 |
| 506 | lagunamide D' | M       | <i>Dichothrix</i> sp. and <i>Lyngbya</i> sp.<br>(assemblage) | 10.3390/md17020083              |
| 507 | lagunamide D  | M       | <i>Dichothrix</i> sp. and <i>Lyngbya</i> sp.<br>(assemblage) | 10.3390/md17020083              |
| 508 | odoamide      | M       | <i>Okeania</i> sp.                                           | 10.1016/j.tet.2016.07.031       |

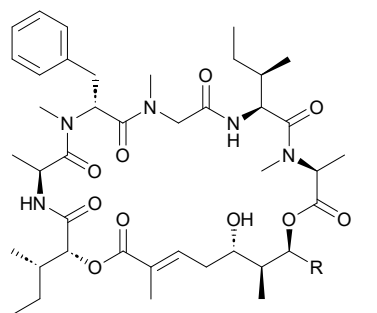

503 lagunamide A

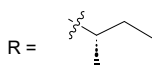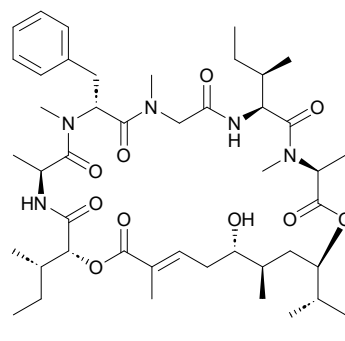

505 lagunamide C

504 lagunamide B

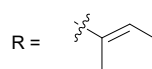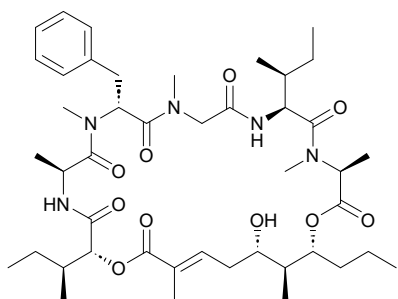

506 lagunamide D

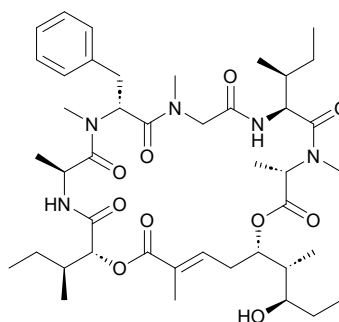

507 lagunamide D'

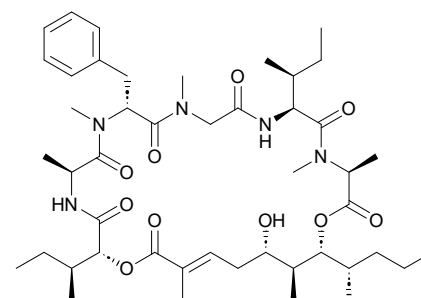

508 odoamide



Table S1. (continued)

| #   | Compound              | Habitat | Producing organism        | DOI                          |
|-----|-----------------------|---------|---------------------------|------------------------------|
| 509 | apratoxin F           | M       | <i>Lyngbya bouillonii</i> | 10.1002/cbic.201000070       |
| 510 | apratoxin G           | M       | <i>Lyngbya bouillonii</i> | 10.1002/cbic.201000070       |
| 511 | apratoxin H           | M       | <i>Moorea producens</i>   | 10.1021/np4004992            |
| 512 | apratoxin A sulfoxide | M       | <i>Moorea producens</i>   | 10.1021/np4004992            |
| 513 | janadolide            | M       | <i>Okeania</i> sp.        | 10.1021/acs.jnatprod.6b00171 |
| 514 | norbisebromoamide     | M       | <i>Lyngbya</i> sp.        | 10.1016/j.tet.2010.11.106    |
| 515 | ypaoamide B           | M       | <i>Okeania</i> sp.        | 10.1021/acs.jnatprod.8b00088 |
| 516 | ypaoamide C           | M       | <i>Okeania</i> sp.        | 10.1021/acs.jnatprod.8b00088 |

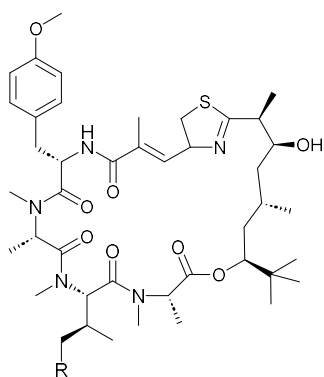509 apratoxin F R = CH<sub>3</sub>

510 apratoxin G R = H

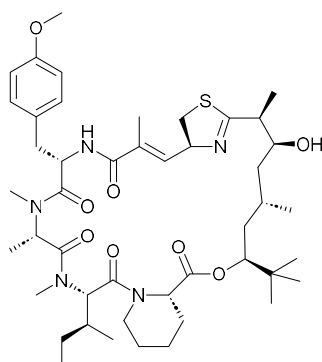

511 apratoxin H

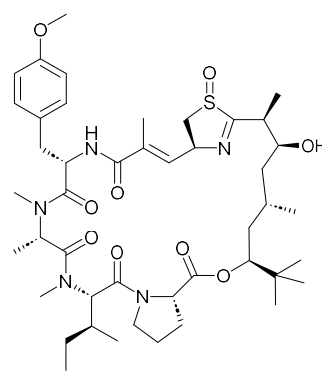

512 apratoxin A sulfoxide

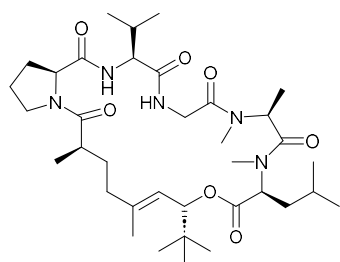

513 janadolide

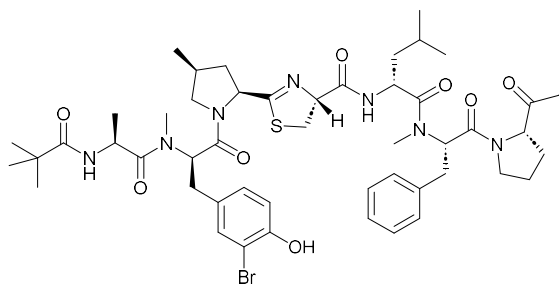

514 norbisebromoamide

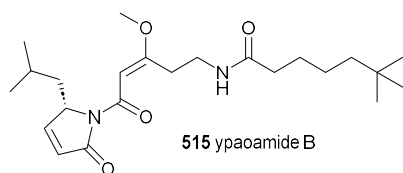

515 ypaoamide B

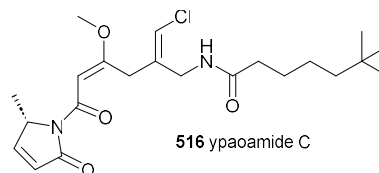

516 ypaoamide C

Table S1. (continued)

| #   | Compound                   | Habitat | Producing organism                        | DOI                          |
|-----|----------------------------|---------|-------------------------------------------|------------------------------|
| 517 | gatorbulin-1               | M       | <i>Lyngbya cf. confervoides</i>           | 10.1073/pnas.2021847118      |
| 518 | gatorbulin-2               | M       | <i>Lyngbya cf. confervoides</i>           | 10.1073/pnas.2021847118      |
| 519 | aetokthonostatin           | F       | <i>Aetokthonos hydrillicola</i>           | 10.1073/pnas.2219230120      |
| 520 | monomethylaetokthonostatin | F       | <i>Aetokthonos hydrillicola</i>           | 10.1073/pnas.2219230120      |
| 521 | des-Aph-aetokthonostatin   | F       | <i>Aetokthonos hydrillicola</i>           | 10.1073/pnas.2219230120      |
| 522 | grassystatin D             | M       | <i>Leptolyngbya</i> and <i>Phormidium</i> | 10.1021/acs.jnatprod.7b00551 |
| 523 | grassystatin E             | M       | <i>Leptolyngbya</i> and <i>Phormidium</i> | 10.1021/acs.jnatprod.7b00551 |
| 524 | grassystatin F             | M       | <i>Leptolyngbya</i> and <i>Phormidium</i> | 10.1021/acs.jnatprod.7b00551 |

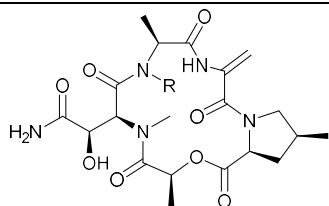

517 gatorbulin-1 R = OH

518 gatorbulin-2 R = H

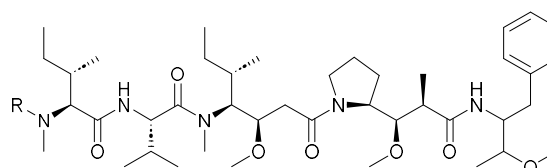519 aetokthonostatin R = CH<sub>3</sub>

520 monomethylaetokthonostatin R = H

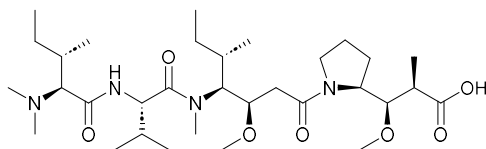

521 des-Aph-Aetokthonostatin

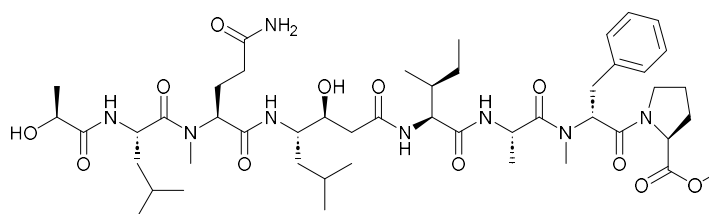

522 grassystatin D

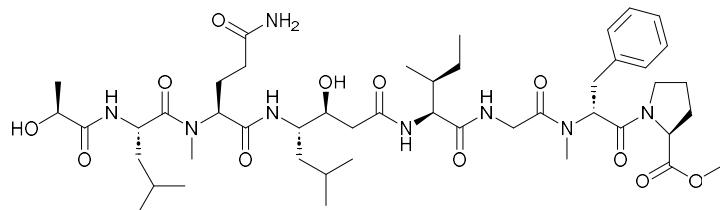

523 grassystatin E

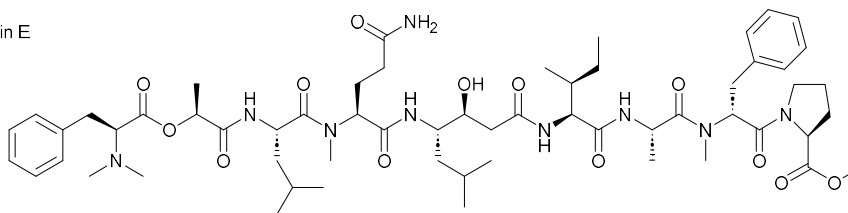

524 grassystatin F

Table S1. (continued)

| #   | Compound    | Habitat | Producing organism        | DOI                          |
|-----|-------------|---------|---------------------------|------------------------------|
| 525 | symplocin A | M       | <i>Symplococarpus</i> sp. | 10.1021/np200861n            |
| 526 | maedamide   | M       | <i>Lyngbya</i> sp.        | 10.1016/j.tetlet.2014.05.099 |
| 527 | izenamide A | M       | <i>Lyngbya</i> sp.        | 10.1021/acs.jnatprod.8b00417 |
| 528 | izenamide B | M       | <i>Lyngbya</i> sp.        | 10.1021/acs.jnatprod.8b00417 |
| 529 | izenamide C | M       | <i>Lyngbya</i> sp.        | 10.1021/acs.jnatprod.8b00417 |
| 530 | tasiamide C | M       | <i>Symplococarpus</i> sp. | 10.1021/np401051z            |
| 531 | tasiamide D | M       | <i>Symplococarpus</i> sp. | 10.1021/np401051z            |
| 532 | tasiamide E | M       | <i>Symplococarpus</i> sp. | 10.1021/np401051z            |
| 533 | tasiamide F | M       | <i>Lyngbya</i> sp.        | 10.1016/j.bmc.2016.04.062    |

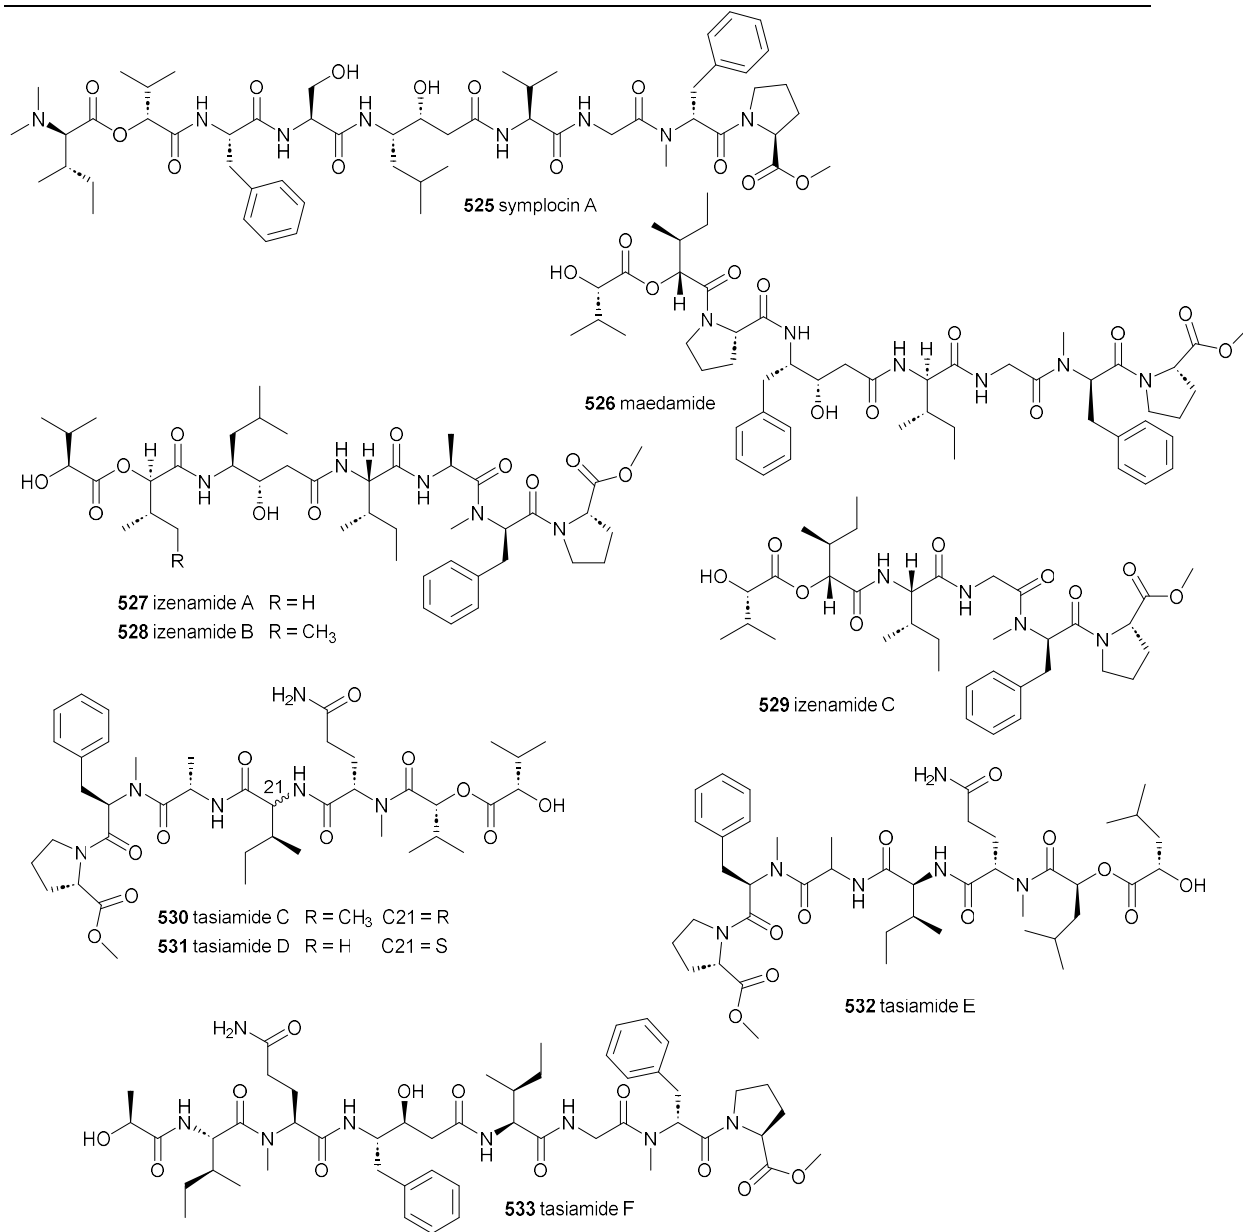

Table S1. (continued)

| #   | Compound         | Habitat | Producing organism               | DOI                          |
|-----|------------------|---------|----------------------------------|------------------------------|
| 534 | phormidepistatin | F       | <i>cf. Phormidium</i> sp.        | 10.1021/acs.jnatprod.1c00334 |
| 535 | almiramide A     | M       | <i>Lyngbya majuscula</i>         | 10.1021/jm100265s            |
| 536 | almiramide B     | M       | <i>Lyngbya majuscula</i>         | 10.1021/jm100265s            |
| 537 | almiramide C     | M       | <i>Lyngbya majuscula</i>         | 10.1021/jm100265s            |
| 538 | almiramide D     | M       | <i>Oscillatoria nigroviridis</i> | 10.1016/j.bmc.2014.10.039    |
| 539 | almiramide E     | M       | <i>Oscillatoria nigroviridis</i> | 10.1016/j.bmc.2014.10.039    |
| 540 | almiramide F     | M       | <i>Oscillatoria nigroviridis</i> | 10.1016/j.bmc.2014.10.039    |
| 541 | almiramide G     | M       | <i>Oscillatoria nigroviridis</i> | 10.1016/j.bmc.2014.10.039    |
| 542 | almiramide H     | M       | <i>Oscillatoria nigroviridis</i> | 10.1016/j.bmc.2014.10.039    |
| 543 | dragonamide E    | M       | <i>Lyngbya majuscula</i>         | 10.1021/np900622m            |

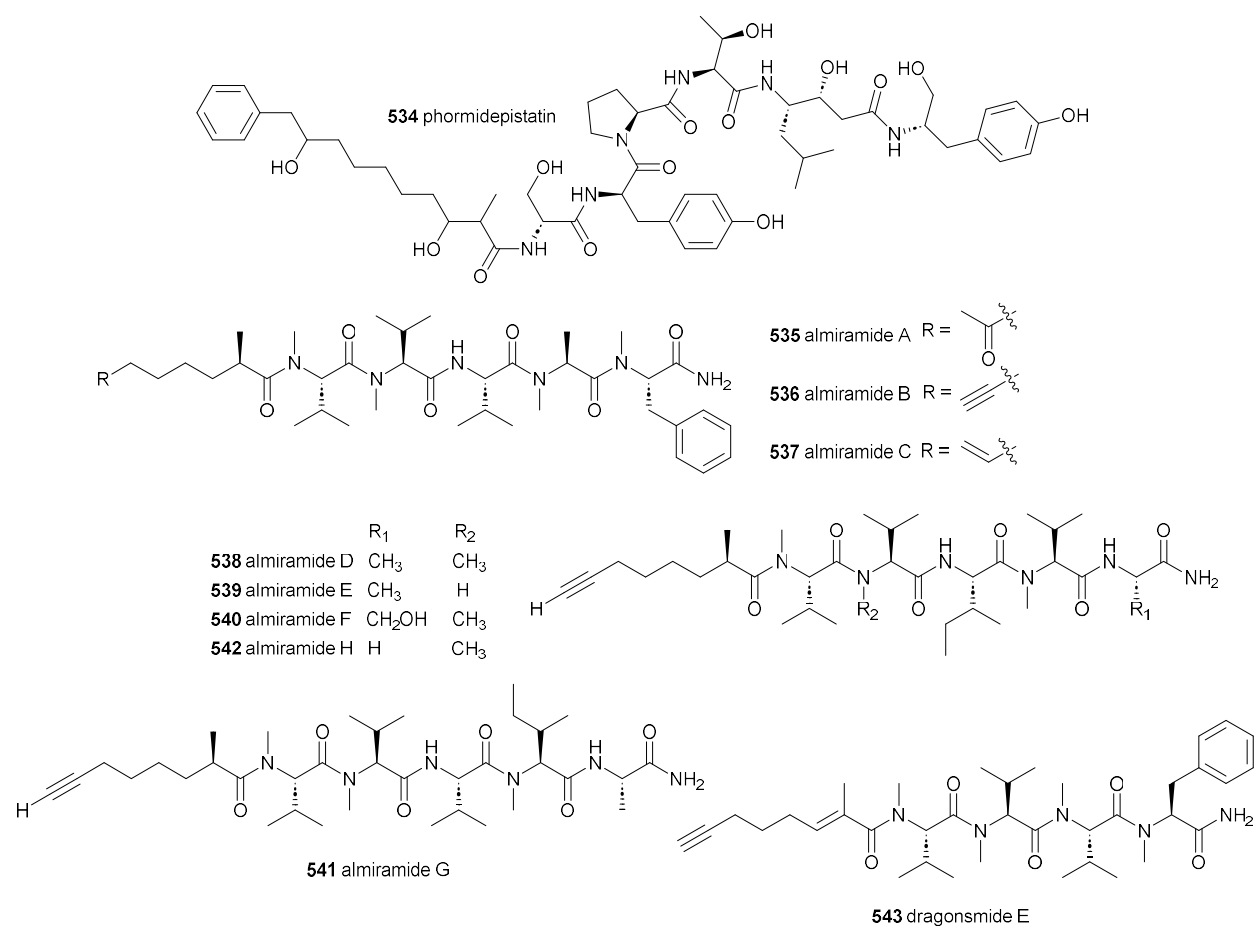

Table S1. (continued)

| #   | Compound        | Habitat | Producing organism        | DOI                          |
|-----|-----------------|---------|---------------------------|------------------------------|
| 544 | kurahyne A      | M       | <i>Lyngbya</i> sp.        | 10.1039/C4RA00132J           |
| 545 | kurahyne B      | M       | <i>Okeania</i> sp.        | 10.1021/acs.jnatprod.5b00662 |
| 546 | jahanyne        | M       | <i>Lyngbya</i> sp.        | 10.1021/ol5036722            |
| 547 | odookeanyne A   | M       | <i>Okeania</i> sp.        | 10.1021/acs.jnatprod.1c00915 |
| 548 | odookeanyne B   | M       | <i>Okeania</i> sp.        | 10.1021/acs.jnatprod.1c00915 |
| 549 | wenchangamide A | M       | cf. <i>Neolyngbya</i> sp. | 10.3390/md19070397           |
| 550 | minnamide A     | M       | <i>Okeania hirsuta</i>    | 10.1021/acs.orglett.9b00135  |

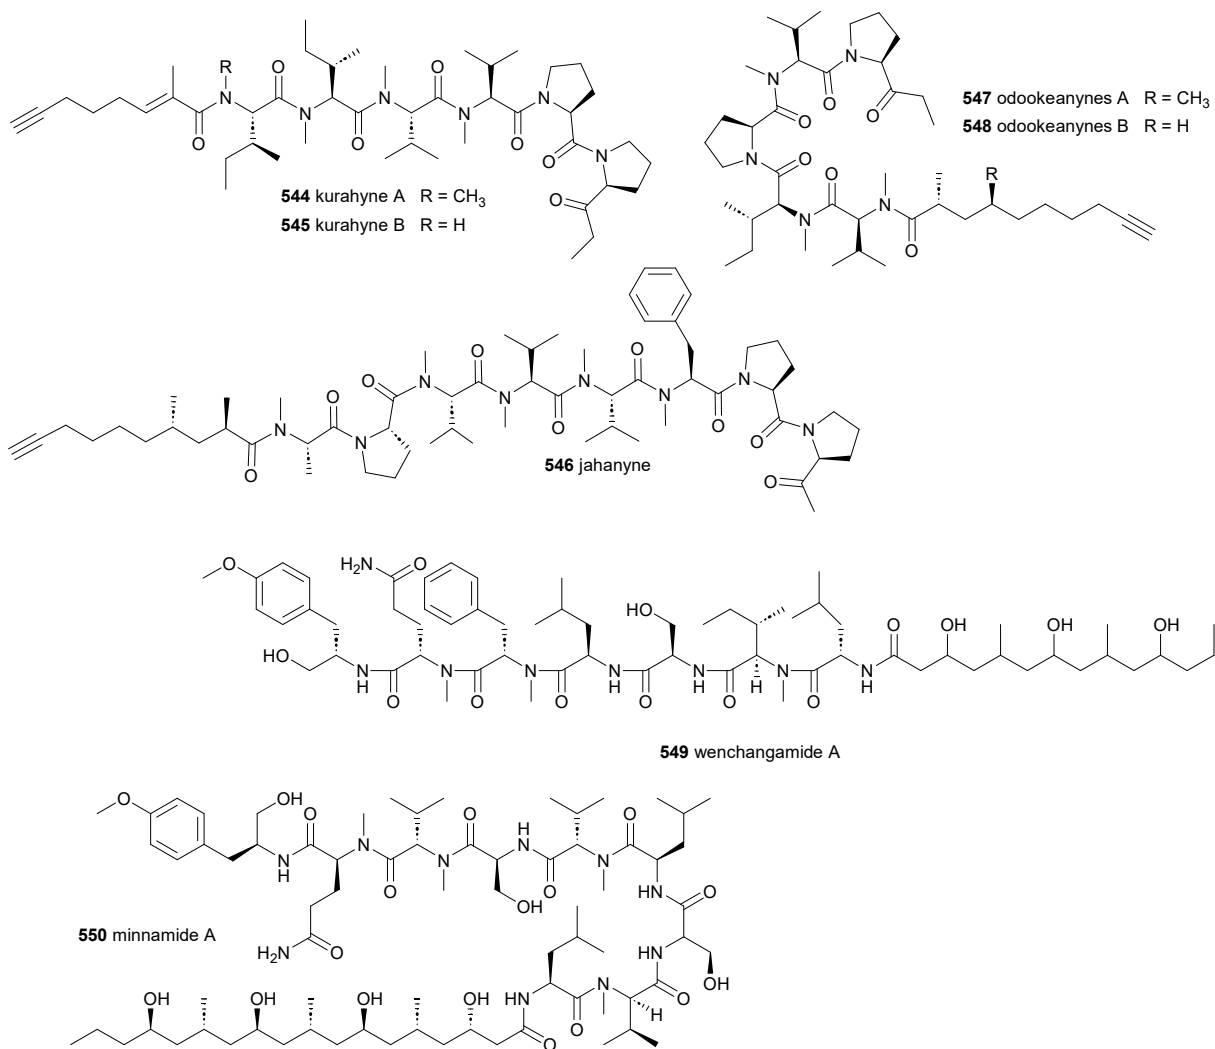

Table S1. (continued)

| #   | Compound     | Habitat | Producing organism      | DOI                          |
|-----|--------------|---------|-------------------------|------------------------------|
| 551 | ikoamide     | M       | <i>Okeania</i> sp.      | 10.1021/acs.jnatprod.9b01147 |
| 552 | microcolin E | M       | <i>Moorea producens</i> | 10.1021/acs.jnatprod.9b00549 |
| 553 | microcolin F | M       | <i>Moorea producens</i> | 10.1021/acs.jnatprod.9b00549 |
| 554 | microcolin G | M       | <i>Moorea producens</i> | 10.1021/acs.jnatprod.9b00549 |
| 555 | microcolin H | M       | <i>Moorea producens</i> | 10.1021/acs.jnatprod.9b00549 |
| 556 | microcolin I | M       | <i>Moorea producens</i> | 10.1021/acs.jnatprod.9b00549 |
| 557 | microcolin J | M       | <i>Moorea producens</i> | 10.1021/acs.jnatprod.9b00549 |
| 558 | microcolin K | M       | <i>Moorea producens</i> | 10.1021/acs.jnatprod.9b00549 |
| 559 | microcolin L | M       | <i>Moorea producens</i> | 10.1021/acs.jnatprod.9b00549 |
| 560 | microcolin M | M       | <i>Moorea producens</i> | 10.1021/acs.jnatprod.9b00549 |

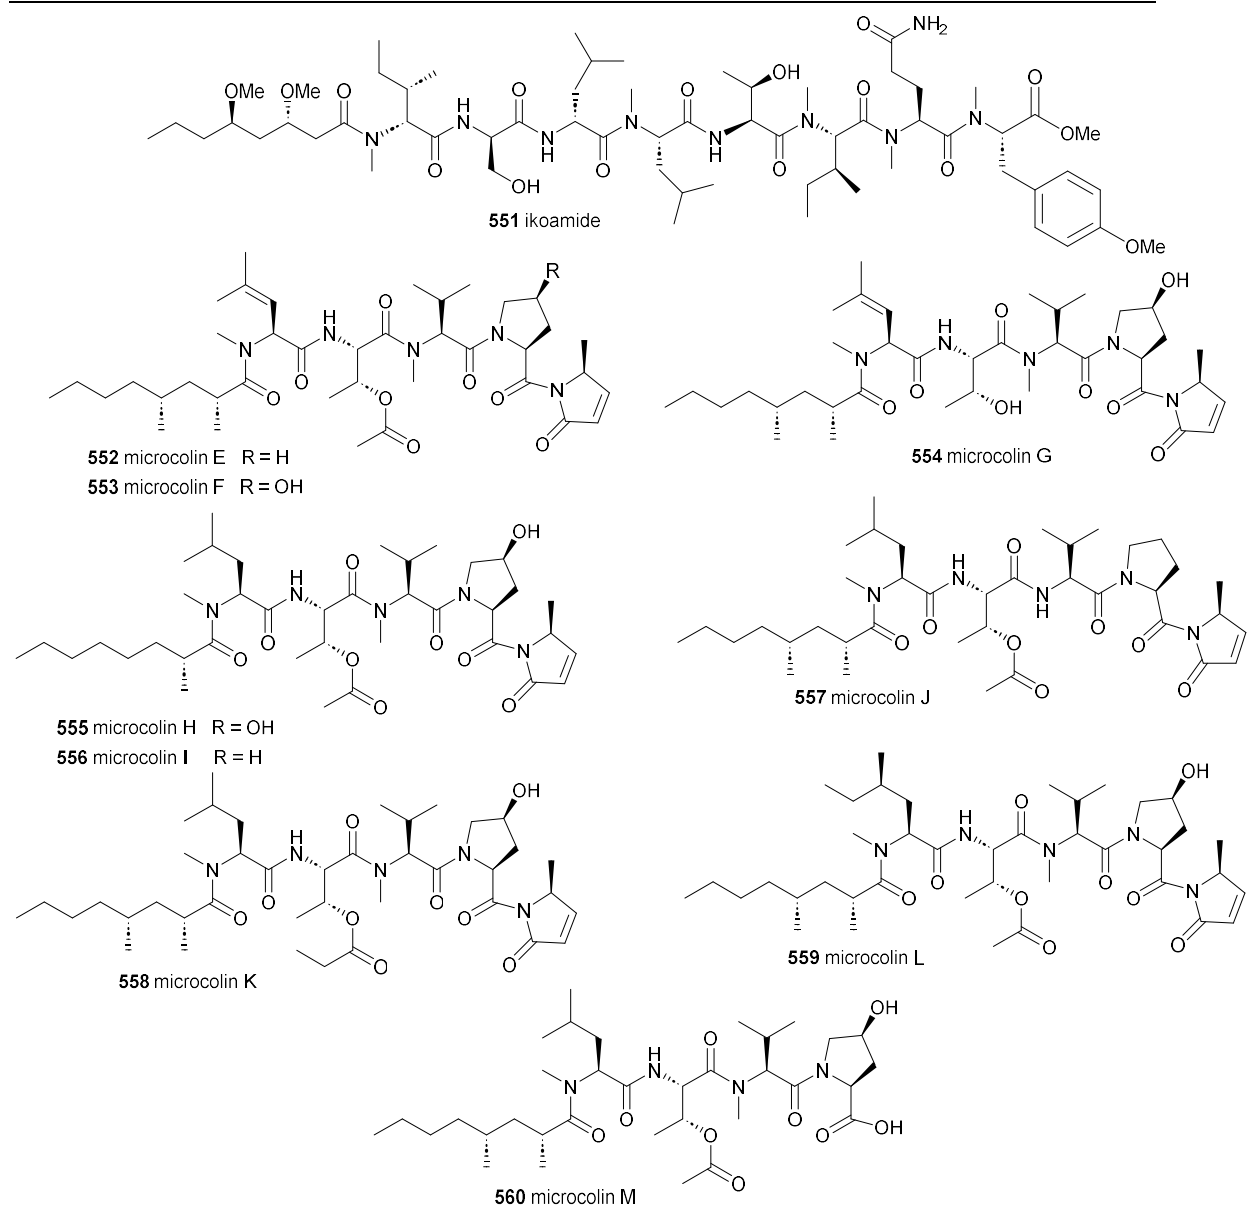

Table S1. (continued)

| #    | Compound           | Habitat | Producing organism         | DOI                          |
|------|--------------------|---------|----------------------------|------------------------------|
| 561  | iheyamide A        | M       | <i>Dapis</i> sp.           | 10.1021/acs.jnatprod.0c00250 |
| 562  | iheyamide B        | M       | <i>Dapis</i> sp.           | 10.1021/acs.jnatprod.0c00250 |
| 563  | iheyamide C        | M       | <i>Dapis</i> sp.           | 10.1021/acs.jnatprod.0c00250 |
| 564* | caldoramide        | M       | <i>Caldora penicillata</i> | 10.1021/acs.jnatprod.6b00203 |
| 565  | heptavalinamide A  | M       | <i>Symploca</i> sp.        | 10.1021/acs.orglett.9b04420  |
| 566  | odopenicillatamide | M       | <i>Caldora penicillata</i> | 10.1016/j.tet.2021.131969    |
| 567  | komesuamide        | M       | <i>Caldora penicillata</i> | 10.1016/j.tet.2021.131969    |

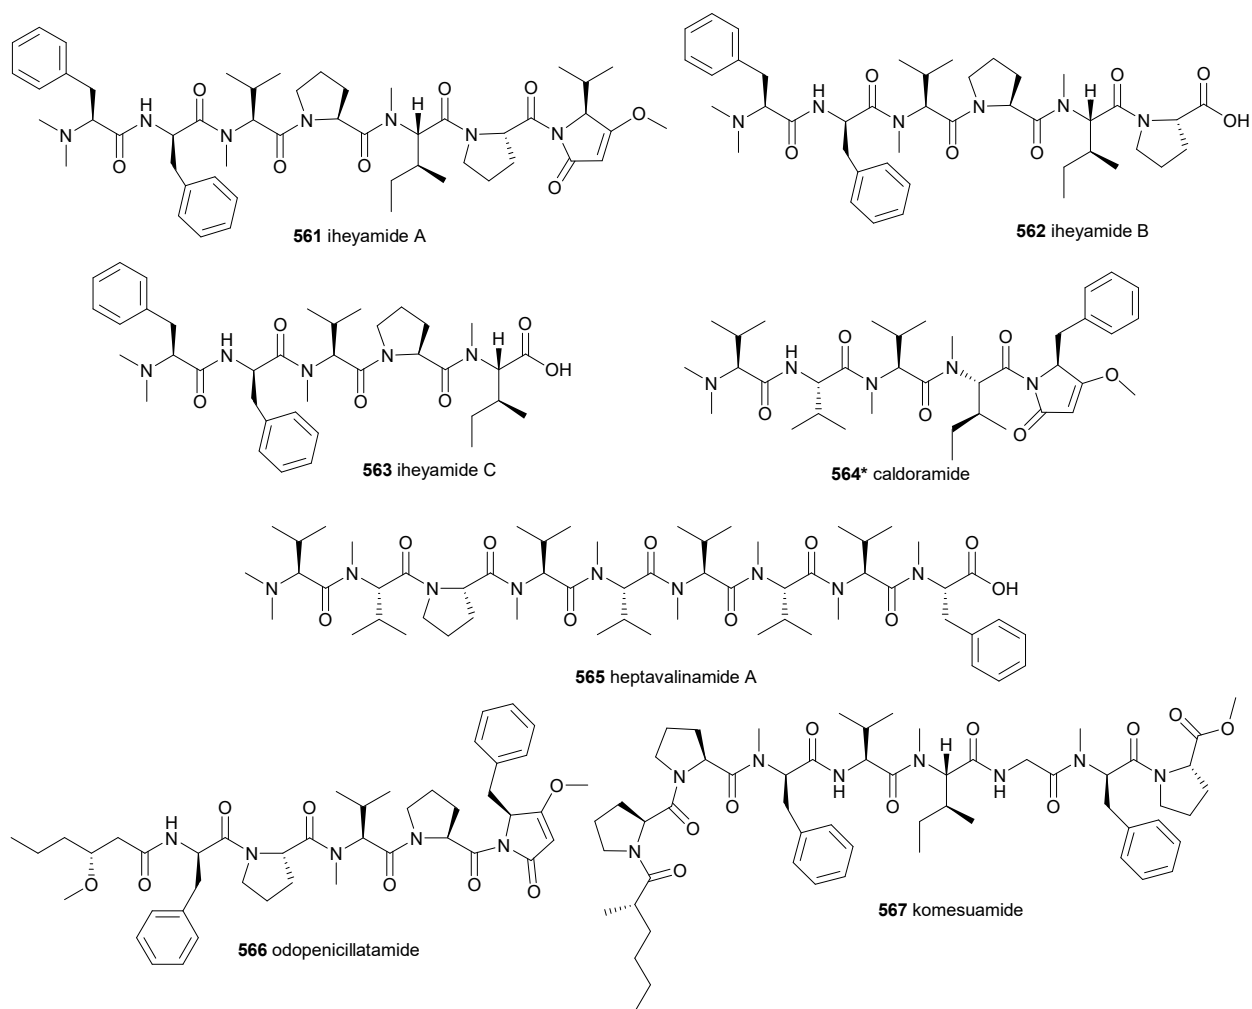

Table S1. (continued)

| #   | Compound       | Habitat | Producing organism          | DOI                          |
|-----|----------------|---------|-----------------------------|------------------------------|
| 568 | kinenzoline    | M       | <i>Salileptolyngbya</i> sp. | 10.1021/acs.joc.1c00817      |
| 569 | hoshinoamide A | M       | <i>Caldora penicillata</i>  | 10.1021/acs.jnatprod.8b00643 |
| 570 | hoshinoamide B | M       | <i>Caldora penicillata</i>  | 10.1021/acs.jnatprod.8b00643 |
| 571 | hoshinoamide C | M       | <i>Caldora penicillata</i>  | 10.1021/acs.jnatprod.0c01209 |

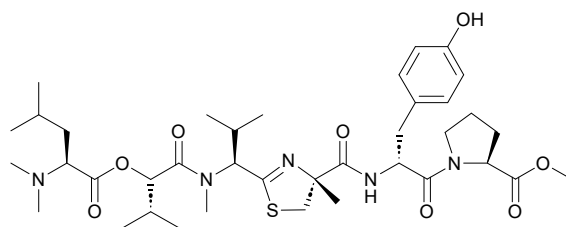

568 kinenzoline

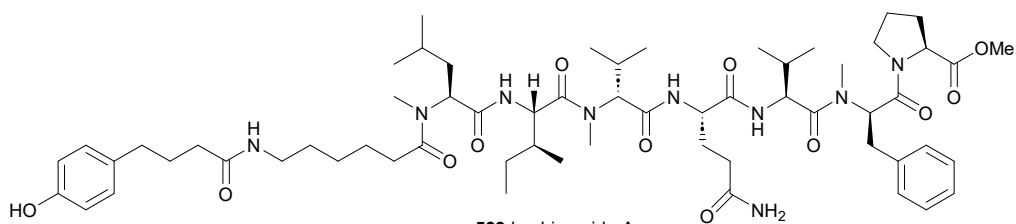

569 hoshioamide A

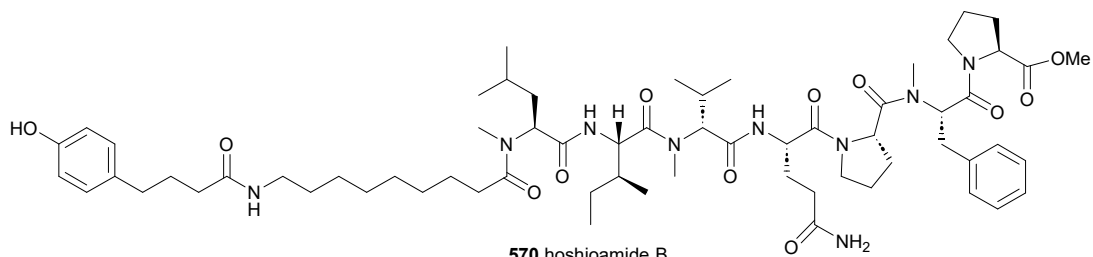

570 hoshioamide B

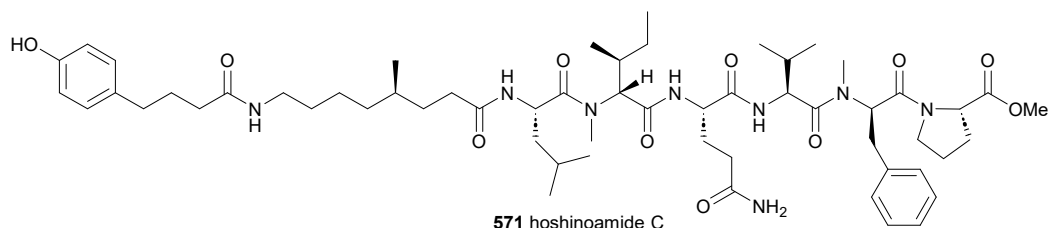

571 hoshioamide C



Table S1. (continued)

| #   | Compound       | Habitat | Producing organism      | DOI                          |
|-----|----------------|---------|-------------------------|------------------------------|
| 572 | brintonamide A | M       | cf. <i>Oscillatoria</i> | 10.1021/acs.jmedchem.8b00885 |
| 573 | brintonamide B | M       | cf. <i>Oscillatoria</i> | 10.1021/acs.jmedchem.8b00885 |
| 574 | brintonamide C | M       | cf. <i>Oscillatoria</i> | 10.1021/acs.jmedchem.8b00885 |
| 575 | brintonamide D | M       | cf. <i>Oscillatoria</i> | 10.1021/acs.jmedchem.8b00885 |
| 576 | brintonamide E | M       | cf. <i>Oscillatoria</i> | 10.1021/acs.jmedchem.8b00885 |
| 577 | amantamide A   | M       | <i>Okeania</i> sp.      | 10.1021/acs.orglett.9b00163  |
| 578 | amantamide B   | M       | cf. <i>Oscillatoria</i> | 10.1021/acs.jnatprod.1c00983 |

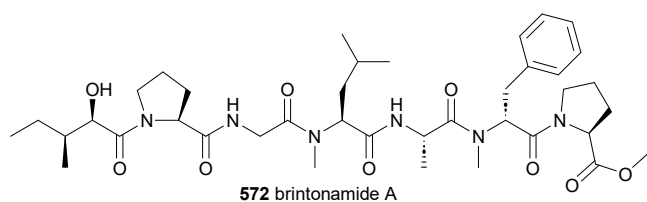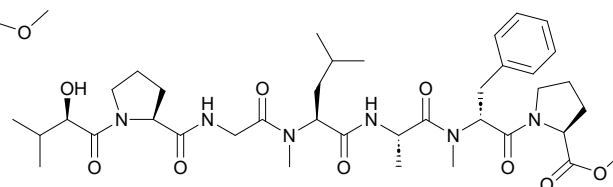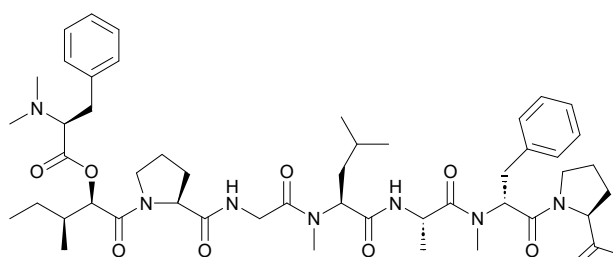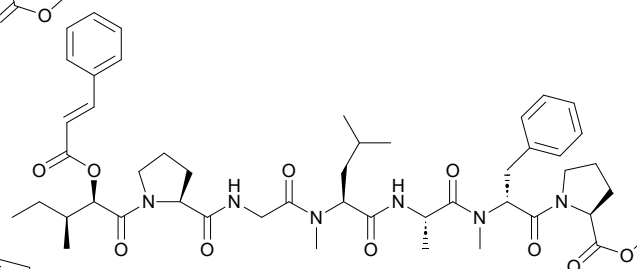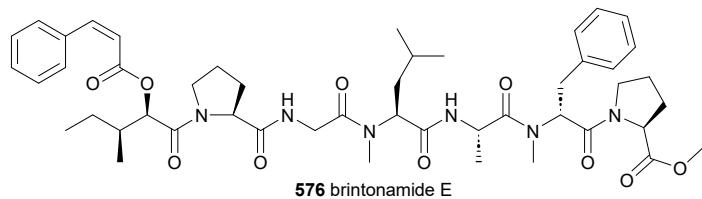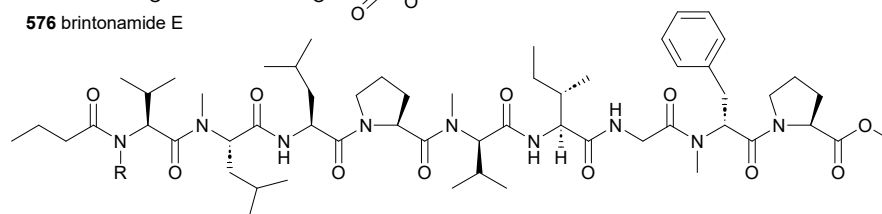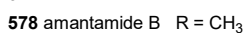

Table S1. (continued)

| #    | Compound          | Habitat | Producing organism                                        | DOI                          |
|------|-------------------|---------|-----------------------------------------------------------|------------------------------|
| 579  | mabuniamide       | M       | <i>Okeania</i> sp.                                        | 10.1021/acs.jnatprod.9b00749 |
| 580  | biseokeaniamide A | M       | <i>Okeania</i> sp.                                        | 10.1021/acs.jnatprod.7b00137 |
| 581  | biseokeaniamide B | M       | <i>Okeania</i> sp.                                        | 10.1021/acs.jnatprod.7b00137 |
| 582  | biseokeaniamide C | M       | <i>Okeania</i> sp.                                        | 10.1021/acs.jnatprod.7b00137 |
| 583  | lyngbyapeptin D   | M       | <i>Lyngbya bouillonii</i>                                 | 10.1021/np1004032            |
| 584* | cyanochelin A     | M       | <i>Rivularia</i> sp.                                      | 10.1128/AEM.03128-20         |
| 585  | iezoside          | M       | <i>Leptochromothrix valpauliae</i>                        | 10.1021/jacs.2c04459         |
| 586  | iezoside B        | M       | <i>Dichothrix</i> sp. and <i>Lyngbya</i> sp. (assemblage) | 10.3390/md21070378           |

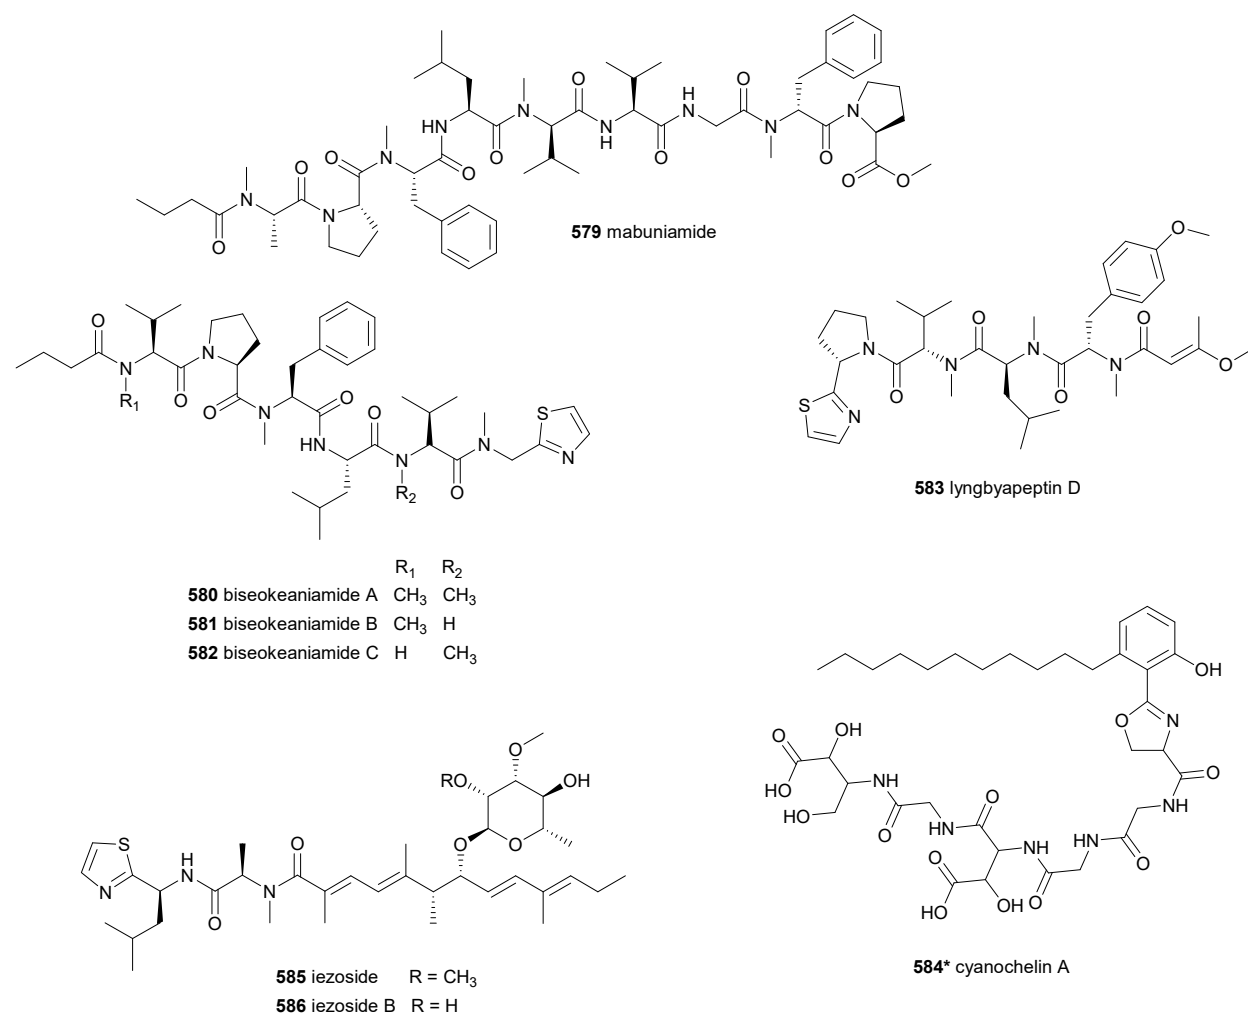

Table S1. (continued)

| #    | Compound          | Habitat | Producing organism                | DOI                          |
|------|-------------------|---------|-----------------------------------|------------------------------|
| 587  | carmaphycin A     | M       | <i>Symploca</i> sp.               | 10.1002/cbic.201200007       |
| 588  | carmaphycin B     | M       | <i>Symploca</i> sp.               | 10.1002/cbic.201200007       |
| 589  | hectochlorin B    | M       | <i>Moorea producens</i>           | 10.1371/journal.pone.0133297 |
| 590  | hectochlorin C    | M       | <i>Moorea producens</i>           | 10.1371/journal.pone.0133297 |
| 591  | hectochlorin D    | M       | <i>Moorea producens</i>           | 10.1371/journal.pone.0133297 |
| 592* | hectoramide       | M       | <i>Moorea producens</i>           | 10.1371/journal.pone.0133297 |
| 593* | cryptomaldamide   | M       | <i>Moorea producens</i>           | 10.1021/acs.jnatprod.7b00019 |
| 594  | deoxykasumigamide | F       | <i>Microcystis aeruginosa</i>     | 10.1002/cbic.202000409       |
| 595  | nosperin          | F       | <i>Nostoc</i> sp.                 | 10.1073/pnas.1305867110      |
| 596  | cusperin A        | F       | <i>Cuspidothrix issatschenkoi</i> | 10.1021/acscchembio.7b01048  |
| 597  | cusperin B        | F       | <i>Cuspidothrix issatschenkoi</i> | 10.1021/acscchembio.7b01048  |

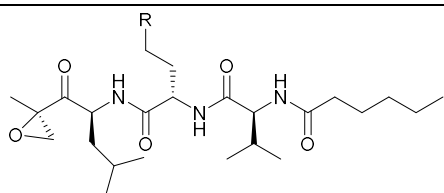

587 carmaphycin A R = SOCH<sub>3</sub>  
 588 carmaphycin B R = SO<sub>2</sub>CH<sub>3</sub>

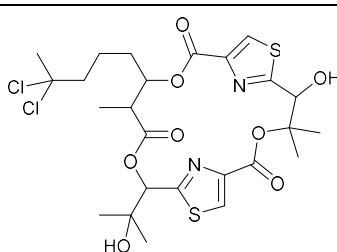

589 hectochlorin B

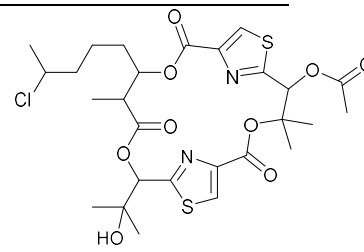

590 hectochlorin C

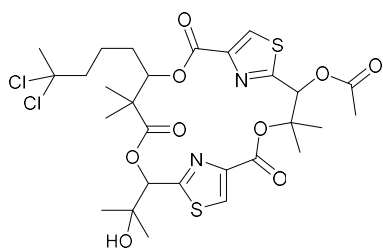

591 hectochlorin D

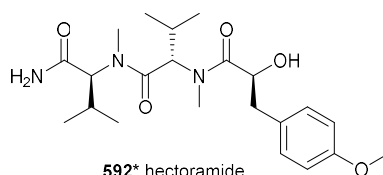

592\* hectoramide

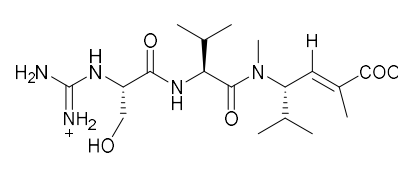

593\* cryptomaldamide

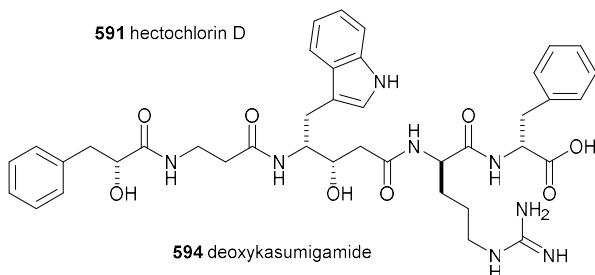

594 deoxykasumigamide

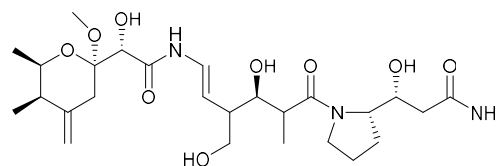

595 nosperin

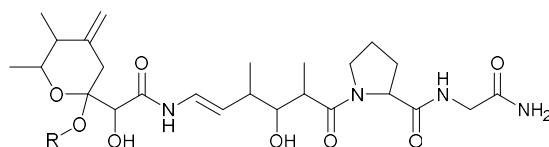596 cusperin A R = CH<sub>3</sub>

597 cusperin B R = H

**Table S2. Macrolides, cyclophanes, and related compounds from cyanobacteria (2010-2023)**

| #    | Compound       | Habitat | Producing organism      | DOI                          |
|------|----------------|---------|-------------------------|------------------------------|
| 598  | bastimolide A  | M       | <i>Okeania hirsuta</i>  | 10.1021/acs.joc.5b01264      |
| 599  | nuiapolide     | M       | n.r.                    | 10.3390/md13106274           |
| 600  | amantelide A   | M       | Oscillatoriiales        | 10.1021/acs.jnatprod.5b00293 |
| 601  | amantelide B   | M       | Oscillatoriiales        | 10.1021/acs.jnatprod.5b00293 |
| 602  | palstimolide A | M       | <i>Leptolyngbya</i> sp. | 10.3390/molecules25071604    |
| 603  | bastimolide B  | M       | <i>Okeania hirsuta</i>  | 10.1021/acs.jnatprod.7b00917 |
| 604* | caylobolide B  | M       | <i>Phormidium</i> spp.  | 10.1021/np100467d            |

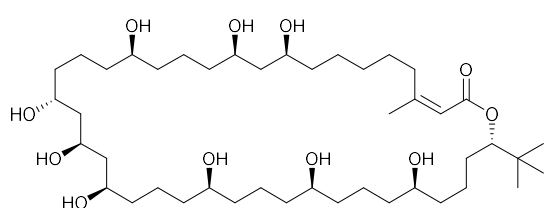

598 bastimolide A

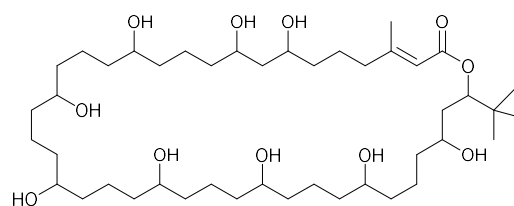

599 nuiapolide

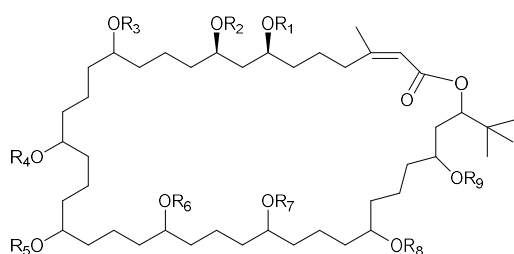R<sub>1</sub>-R<sub>7</sub> R<sub>8</sub> R<sub>9</sub>

600 amantelide A H H H

601 amantelide B H Ac H

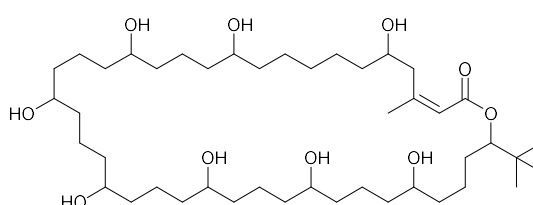

602 palstimolide A

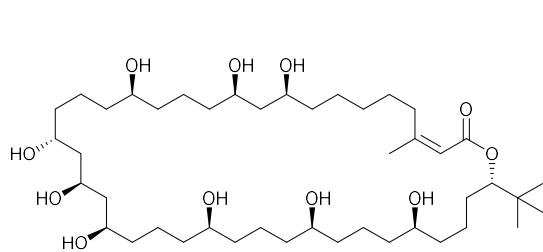

603 bastimolide A

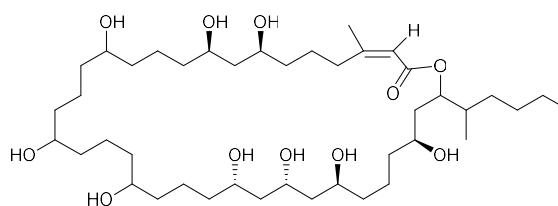

604\* caylobolide B

Table S2. (continued)

| #    | Compound                    | Habitat | Producing organism        | DOI                          |
|------|-----------------------------|---------|---------------------------|------------------------------|
| 605  | sacrolide A                 | F       | <i>Aphanothece sacrum</i> | 10.3762/bjoc.10.190          |
| 606  | 9- <i>epi</i> -sacrolide A  | F       | <i>Aphanothece sacrum</i> | 10.1038/ja.2017.32           |
| 607* | 15,16-dihydrosacrolide A    | F       | <i>Aphanothece sacrum</i> | 10.1038/ja.2017.32           |
| 608* | koshikalide                 | M       | <i>Lyngbya</i> sp.        | 10.1016/j.tetlet.2009.12.041 |
| 609  | nostovalerolactone          | F       | <i>Nostoc punctiforme</i> | 10.1002/anie.202204545       |
| 610  | 9-dehydronostovalerolactone | F       | <i>Nostoc punctiforme</i> | 10.1002/anie.202204545       |
| 611* | nostoclide N1               | F       | <i>Nostoc punctiforme</i> | 10.1002/anie.202204545       |
| 612* | nostoclide N2               | F       | <i>Nostoc punctiforme</i> | 10.1002/anie.202204545       |

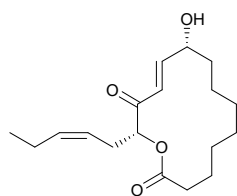

605 sacrolide A

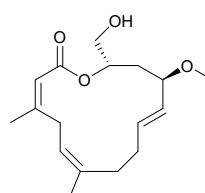

608\* koshikalide

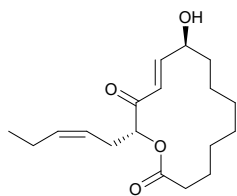606 9-*epi*-sacrolide A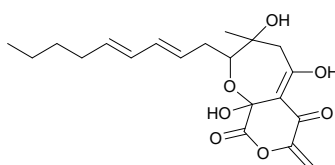

609 nostovalerolactone

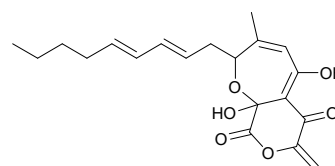

610 dehydronostovalerolactone

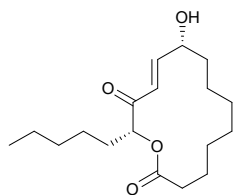

607\* 15,16-dihydrosacrolide A

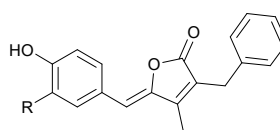

611\* nostoclide N1 H

612\* nostoclide N2 OMe

Table S2. (continued)

| #   | Compound          | Habitat | Producing organism | DOI                       |
|-----|-------------------|---------|--------------------|---------------------------|
| 613 | biselyngbyolide A | M       | <i>Lyngbya</i> sp. | 10.1246/cl.2012.165       |
| 614 | biselyngbyolide B | M       | <i>Lyngbya</i> sp. | 10.1246/cl.130960         |
| 615 | biselyngbyolide C | M       | <i>Lyngbya</i> sp. | 10.1246/bcsj.20150117     |
| 616 | biselyngbyaside B | M       | <i>Lyngbya</i> sp. | 10.1016/j.tet.2012.05.038 |
| 617 | biselyngbyaside C | M       | <i>Lyngbya</i> sp. | 10.1016/j.tet.2012.05.038 |
| 618 | biselyngbyaside D | M       | <i>Lyngbya</i> sp. | 10.1016/j.tet.2012.05.038 |
| 619 | biselyngbyaside E | M       | <i>Lyngbya</i> sp. | 10.1246/bcsj.20150117     |
| 620 | biselyngbyaside F | M       | <i>Lyngbya</i> sp. | 10.1246/bcsj.20150117     |

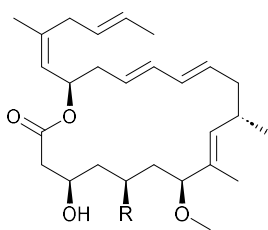

613 biselyngbyolide A R = OH

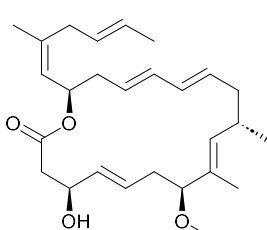

614 biselyngbyolide B

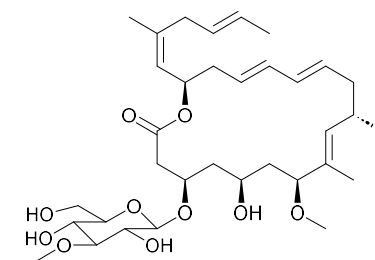

616 biselyngbyaside B

615 biselyngbyolide C R = H

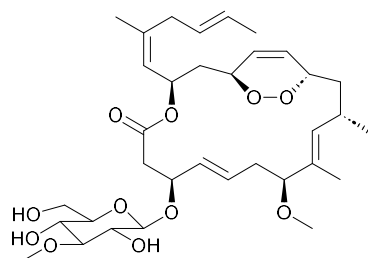

617 biselyngbyaside C

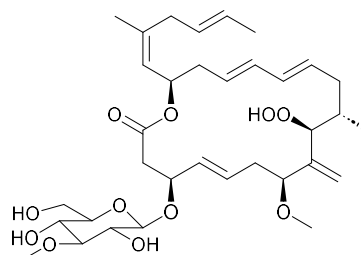

618 biselyngbyaside D

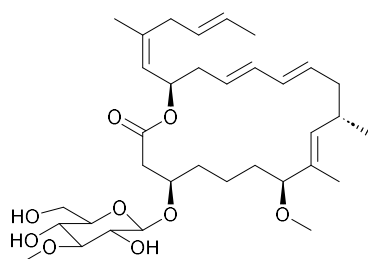

619 biselyngbyaside E

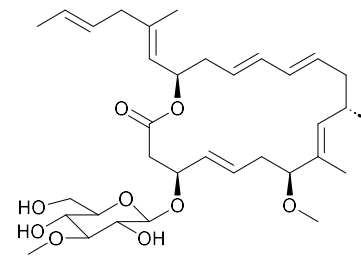

620 biselyngbyaside F

Table S2. (continued)

| #   | Compound                     | Habitat | Producing organism        | DOI                          |
|-----|------------------------------|---------|---------------------------|------------------------------|
| 621 | 2- <i>epi</i> -lyngbyaloside | M       | <i>Lyngbya bouillonii</i> | 10.1021/np1004032            |
| 622 | 18 <i>E</i> -lyngbyaloside C | M       | <i>Lyngbya bouillonii</i> | 10.1021/np1004032            |
| 623 | 18 <i>Z</i> -lyngbyaloside C | M       | <i>Lyngbya bouillonii</i> | 10.1021/np1004032            |
| 624 | irijimaside A                | M       | <i>Okeania</i> sp.        | 10.1021/acs.jnatprod.0c00042 |
| 625 | irijimaside B                | M       | <i>Okeania</i> sp.        | 10.1021/acs.jnatprod.0c00042 |
| 626 | irijimaside C                | M       | <i>Okeania</i> sp.        | 10.1021/acs.jnatprod.0c00042 |
| 627 | irijimaside D                | M       | <i>Okeania</i> sp.        | 10.1021/acs.jnatprod.0c00042 |
| 628 | irijimaside E                | M       | <i>Okeania</i> sp.        | 10.1021/acs.jnatprod.0c00042 |

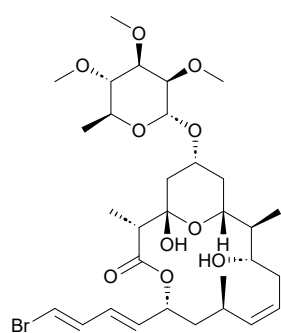621 2-*epi*-Lyngbyaloside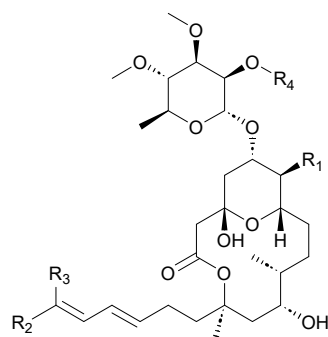R<sub>1</sub> R<sub>2</sub> R<sub>3</sub> R<sub>4</sub>622 18*E*-Lyngbyaloside C H Br H Me623 18*Z*-Lyngbyaloside C H H Br Me

|                   | R <sub>1</sub>        | R <sub>2</sub>  | R <sub>3</sub>  | R <sub>4</sub>  |
|-------------------|-----------------------|-----------------|-----------------|-----------------|
| 624 irijimaside A | CH=CH <sub>2</sub>    | CH <sub>3</sub> | CH <sub>3</sub> | CH <sub>3</sub> |
| 625 irijimaside B | CH=CH <sub>2</sub>    | CH <sub>3</sub> | H               | CH <sub>3</sub> |
| 626 irijimaside C | CH=CH <sub>2</sub>    | H               | CH <sub>3</sub> | CH <sub>3</sub> |
| 627 irijimaside D | CH=CH <sub>2</sub>    | CH <sub>3</sub> | CH <sub>3</sub> | H               |
| 628 irijimaside E | CH <sub>2</sub> CH≡CH | CH <sub>3</sub> | CH <sub>3</sub> | CH <sub>3</sub> |

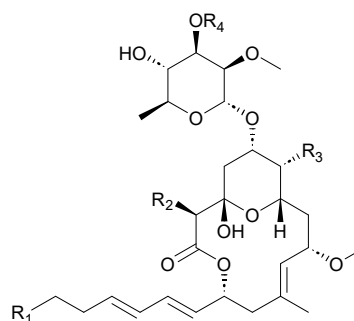

Table S2. (continued)

| #   | Compound          | Habitat | Producing organism        | DOI                          |
|-----|-------------------|---------|---------------------------|------------------------------|
| 629 | cyanolide A       | M       | <i>Lyngbya bouillonii</i> | 10.1021/np9008128            |
| 630 | polycavernoside D | M       | <i>Okeania</i> sp.        | 10.1021/acs.estlett.5b00116  |
| 631 | cocosolide        | M       | <i>Symploca</i> sp.       | 10.1002/chem.201600674       |
| 632 | akunolide A       | M       | <i>Okeania</i> sp.        | 10.1021/acs.jnatprod.3c00742 |
| 633 | akunolide B       | M       | <i>Okeania</i> sp.        | 10.1021/acs.jnatprod.3c00742 |
| 634 | akunolide C       | M       | <i>Okeania</i> sp.        | 10.1021/acs.jnatprod.3c00742 |
| 635 | akunolide D       | M       | <i>Okeania</i> sp.        | 10.1021/acs.jnatprod.3c00742 |

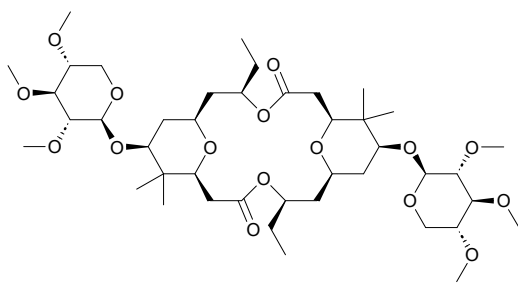

629 cyanolide A

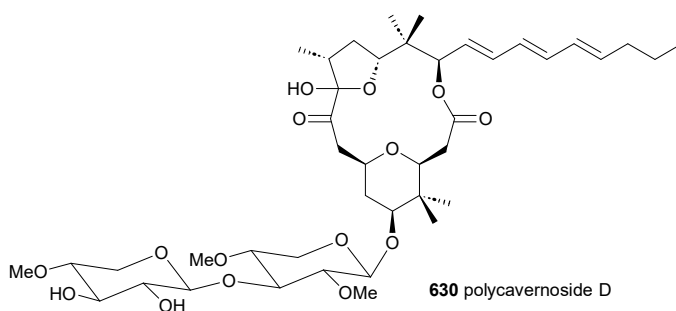

630 polycavernoside D

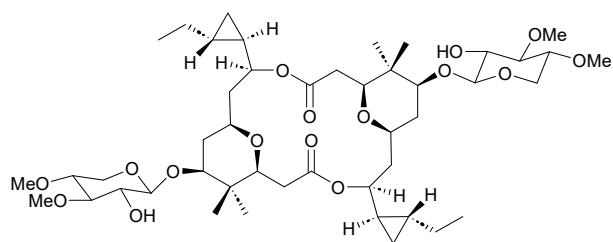

631 cocosolide

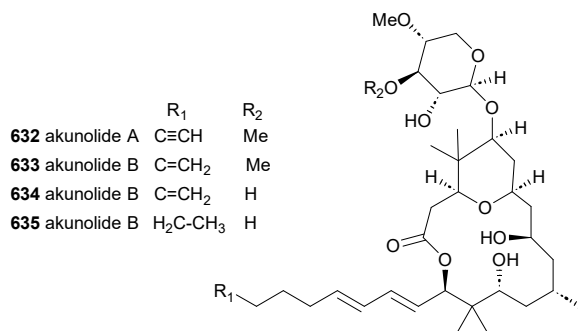



Table S2. (continued)

| #   | Compound                     | Habitat | Producing organism              | DOI                           |
|-----|------------------------------|---------|---------------------------------|-------------------------------|
| 636 | 3-methoxyaplysiatoxin        | M       | <i>Trichodesmium erythraeum</i> | 10.3390/md12010115            |
| 637 | 3-methoxydebromoaplysiatoxin | M       | <i>Trichodesmium erythraeum</i> | 10.3390/md12010115            |
| 638 | neo-aplysiatoxin A           | M       | <i>Moorea producens</i>         | 10.3390/molecules25030457     |
| 639 | neo-debromoaplysiatoxin A    | M       | <i>Lyngbya</i> sp.              | 10.1021/acs.orglett.7b03672   |
| 640 | neo-debromoaplysiatoxin B    | M       | <i>Lyngbya</i> sp.              | 10.1021/acs.orglett.7b03672   |
| 641 | neo-debromoaplysiatoxin C    | M       | <i>Lyngbya</i> sp.              | 10.1080/14786419.2019.1577840 |
| 642 | neo-debromoaplysiatoxin D    | M       | <i>Lyngbya</i> sp.              | 10.1039/c9ra00965e            |
| 643 | neo-debromoaplysiatoxin E    | M       | <i>Lyngbya</i> sp.              | 10.3390/md17120652            |
| 644 | neo-debromoaplysiatoxin F    | M       | <i>Lyngbya</i> sp.              | 10.3390/md17120652            |
| 645 | neo-debromoaplysiatoxin G    | M       | <i>Lyngbya</i> sp.              | 10.3390/toxins12110733        |
| 646 | neo-debromoaplysiatoxin H    | M       | <i>Lyngbya</i> sp.              | 10.3390/toxins12110733        |
| 647 | neo-debromoaplysiatoxin I    | M       | <i>Lyngbya</i> sp.              | 10.3390/molecules28062786     |
| 648 | neo-debromoaplysiatoxin J    | M       | <i>Lyngbya</i> sp.              | 10.3390/molecules28062786     |

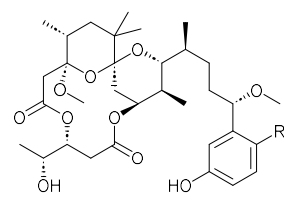

636 3-methoxyaplysiatoxin R = Br  
637 3-methoxydebromoaplysiatoxin R = H

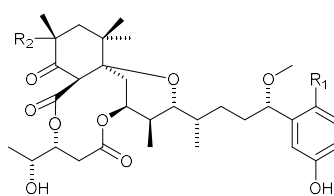

638 neo-aplysiatoxin A R<sub>1</sub> Br R<sub>2</sub> OH  
639 debromoaplysiatoxin A R<sub>1</sub> H R<sub>2</sub> OH  
642 neo-debromoaplysiatoxin D R<sub>1</sub> H R<sub>2</sub> H

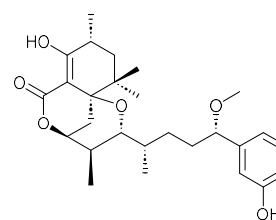

640 neo-debromoaplysiatoxin B

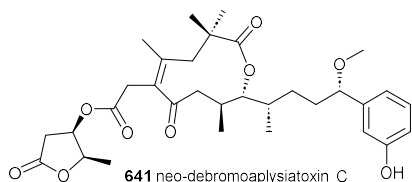

641 neo-debromoaplysiatoxin C

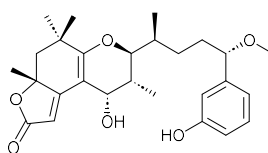

643 neo-debromoaplysiatoxin E

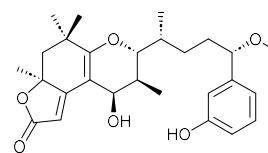

644 neo-debromoaplysiatoxin F

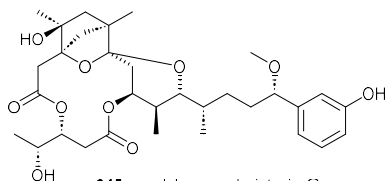

645 neo-debromoaplysiatoxin G

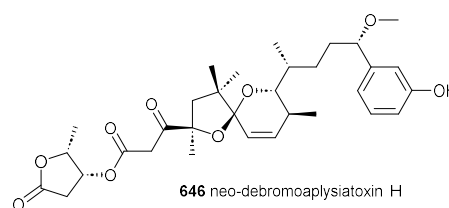

646 neo-debromoaplysiatoxin H

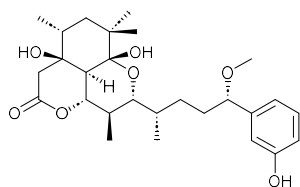

647 neo-debromoaplysiatoxin I

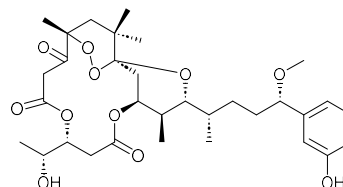

648 neo-debromoaplysiatoxin J

Table S2. (continued)

| #   | Compound       | Habitat | Producing organism      | DOI                       |
|-----|----------------|---------|-------------------------|---------------------------|
| 649 | oscillatoxin E | M       | <i>Lyngbya</i> sp.      | 10.1039/c9ra00965e        |
| 650 | oscillatoxin F | M       | <i>Lyngbya</i> sp.      | 10.1039/c9ra00965e        |
| 651 | oscillatoxin G | M       | <i>Moorea producens</i> | 10.1016/j.tet.2019.03.020 |
| 652 | oscillatoxin H | M       | <i>Moorea producens</i> | 10.1016/j.tet.2019.03.020 |
| 653 | oscillatoxin I | M       | <i>Moorea producens</i> | 10.3390/toxins11060366    |
| 654 | oscillatoxin J | M       | <i>Lyngbya</i> sp.      | 10.3390/md19110630        |
| 655 | oscillatoxin K | M       | <i>Lyngbya</i> sp.      | 10.3390/md19110630        |
| 656 | oscillatoxin L | M       | <i>Lyngbya</i> sp.      | 10.3390/md19110630        |
| 657 | oscillatoxin M | M       | <i>Lyngbya</i> sp.      | 10.3390/md19110630        |

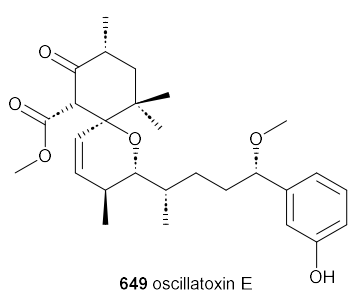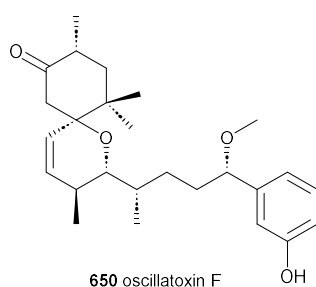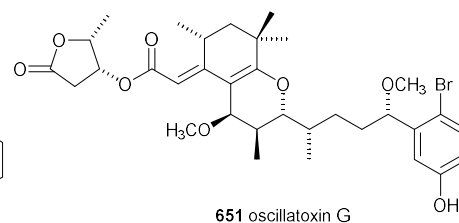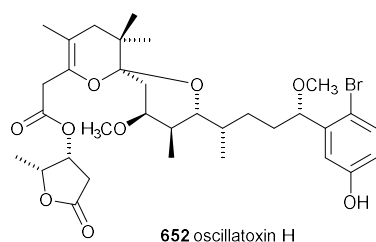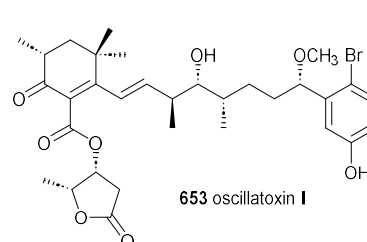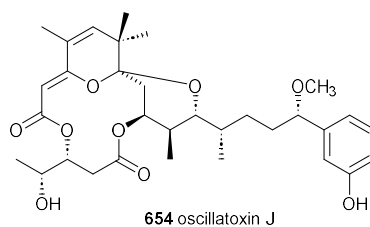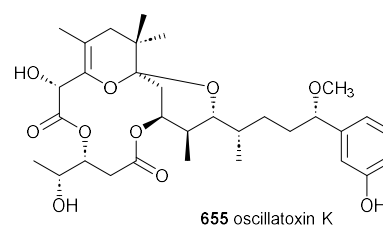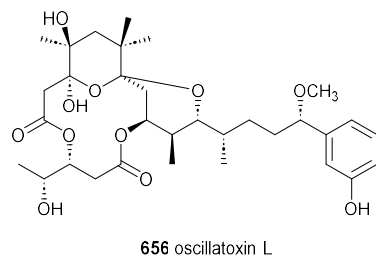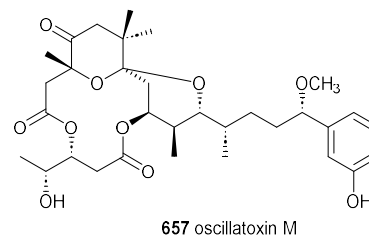

Table S2. (continued)

| #   | Compound                               | Habitat | Producing organism       | DOI                          |
|-----|----------------------------------------|---------|--------------------------|------------------------------|
| 658 | 2-hydroxyanhydroaplysiatoxin           | M       | <i>Moorea producens</i>  | 10.1016/j.tet.2019.03.020    |
| 659 | 17-bromooscillatoxin B2                | M       | <i>Moorea producens</i>  | 10.1016/j.tet.2019.03.020    |
| 660 | 17-bromo-4-hydroperoxyoscillatoxin B2  | M       | <i>Moorea producens</i>  | 10.1016/j.tet.2019.03.020    |
| 661 | 4-hydroperoxyoscillatoxin B2           | M       | <i>Moorea producens</i>  | 10.1016/j.tet.2019.03.020    |
| 662 | 17-bromo-4,26-epoxyoscillatoxin B2     | M       | <i>Moorea producens</i>  | 10.1016/j.tet.2019.03.020    |
| 663 | 17-bromo-30-methyloscillatoxin D       | M       | <i>Moorea producens</i>  | 10.1016/j.tet.2019.03.020    |
| 664 | 7- <i>epi</i> -30-methyloscillatoxin D | M       | <i>Okeania hirsuta</i>   | 10.1177/1934578X231173799    |
| 665 | nhatrangin A                           | M       | <i>Lyngbya majuscula</i> | 10.1021/np100002q            |
| 666 | nhatrangin B                           | M       | <i>Lyngbya majuscula</i> | 10.1021/np100002q            |
| 667 | aplysiadione                           | M       | <i>Moorea producens</i>  | 10.1016/j.rechem.2021.100206 |
| 668 | aplysiaenal                            | M       | <i>Moorea producens</i>  | 10.1016/j.rechem.2021.100206 |

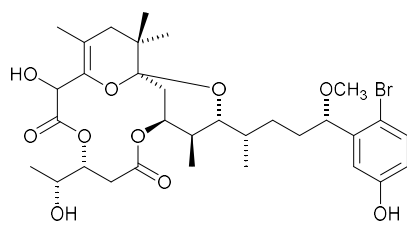

658 2-hydroxyanhydroaplysiatoxin

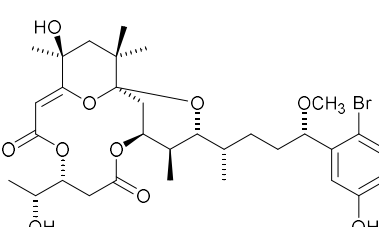

659 17-bromooscillatoxin B2

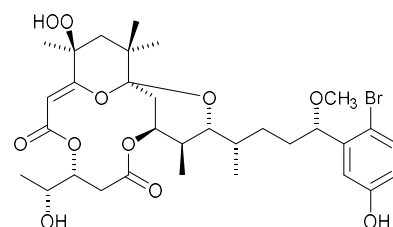

660 17-bromo-4-hydroperoxyoscillatoxin B2

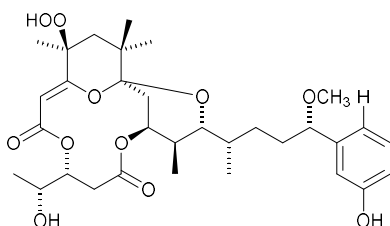

661 4-hydroperoxyoscillatoxin B2

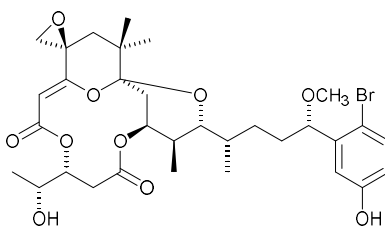

662 17-bromo-4,26-epoxyoscillatoxin B2

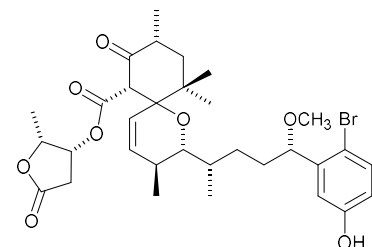

663 17-bromo-30-methyloscillatoxin D

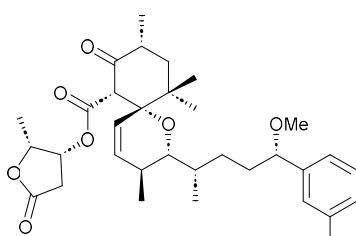664 7-*epi*-30-methyloscillatoxin D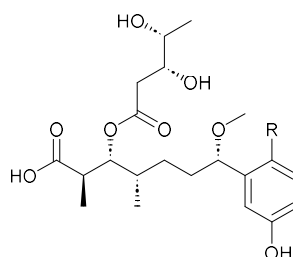665 nhatrangin A R = H  
666 nhatrangin B R = Br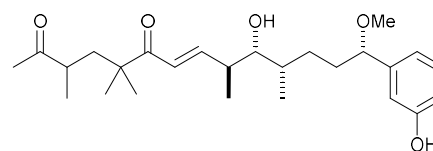

667 aplysiadione

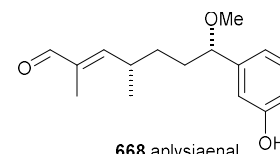

668 aplysiaenal

Table S2. (continued)

| #   | Compound           | Habitat | Producing organism                  | DOI                    |
|-----|--------------------|---------|-------------------------------------|------------------------|
| 669 | luminaolide B      | F       | <i>Planktothrix paucivesiculata</i> | 10.1038/nchembio.1870  |
| 670 | 7-Ome-scytopycin B | F       | <i>Anabaena</i> sp.                 | 10.3390/md13042124     |
| 671 | leptolyngbyolide A | M       | <i>Leptolyngbya</i> sp.             | 10.1002/chem.201701183 |
| 672 | leptolyngbyolide B | M       | <i>Leptolyngbya</i> sp.             | 10.1002/chem.201701183 |
| 673 | leptolyngbyolide C | M       | <i>Leptolyngbya</i> sp.             | 10.1002/chem.201701183 |
| 674 | leptolyngbyolide D | M       | <i>Leptolyngbya</i> sp.             | 10.1002/chem.201701183 |

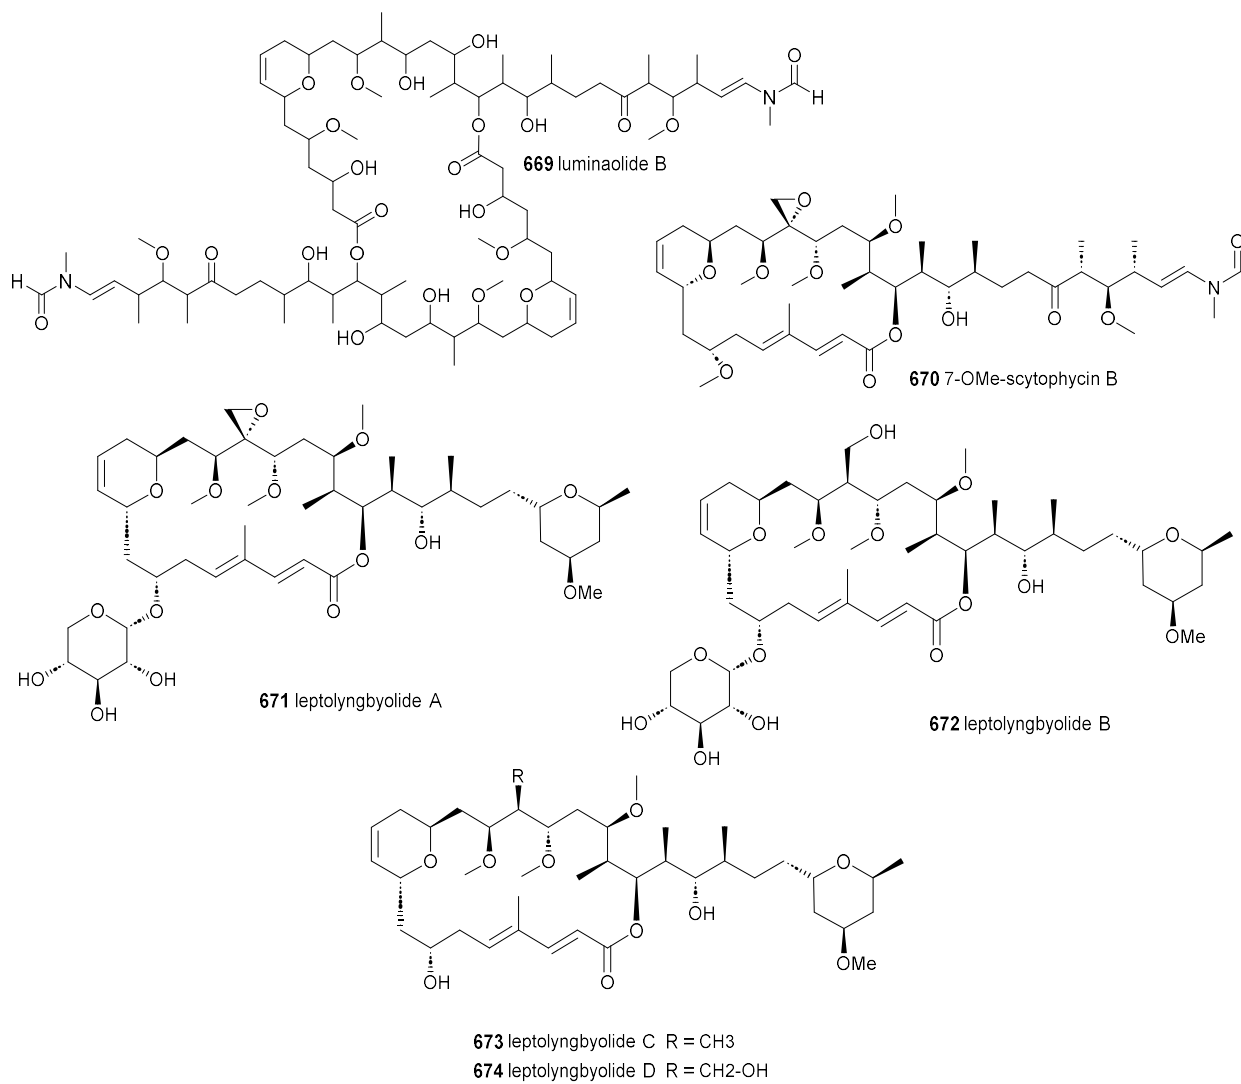

Table S2. (continued)

| #   | Compound       | Habitat | Producing organism                                                | DOI                     |
|-----|----------------|---------|-------------------------------------------------------------------|-------------------------|
| 675 | samholide A    | M       | cf. <i>Phormidium</i> sp.                                         | 10.1021/acs.joc.8b00028 |
| 676 | samholide B    | M       | cf. <i>Phormidium</i> sp.                                         | 10.1021/acs.joc.8b00028 |
| 677 | samholide C    | M       | cf. <i>Phormidium</i> sp.                                         | 10.1021/acs.joc.8b00028 |
| 678 | samholide D    | M       | cf. <i>Phormidium</i> sp.                                         | 10.1021/acs.joc.8b00028 |
| 679 | samholide E    | M       | cf. <i>Phormidium</i> sp.                                         | 10.1021/acs.joc.8b00028 |
| 680 | samholide F    | M       | cf. <i>Phormidium</i> sp.                                         | 10.1021/acs.joc.8b00028 |
| 681 | samholide G    | M       | cf. <i>Phormidium</i> sp.                                         | 10.1021/acs.joc.8b00028 |
| 682 | samholide H    | M       | cf. <i>Phormidium</i> sp.                                         | 10.1021/acs.joc.8b00028 |
| 683 | samholide I    | M       | cf. <i>Phormidium</i> sp.                                         | 10.1021/acs.joc.8b00028 |
| 684 | symplocolide A | M       | <i>Symploca</i> sp.                                               | 10.1021/jacs.9b13786    |
| 685 | laingolide B   | M       | <i>Lyngbya bouillonii</i>                                         | 10.1021/np1004032       |
| 686 | palmyrolide A  | M       | cf. <i>Leptolyngbya</i> and <i>Oscillatoria</i> spp. (assemblage) | 10.1021/ol101752n       |

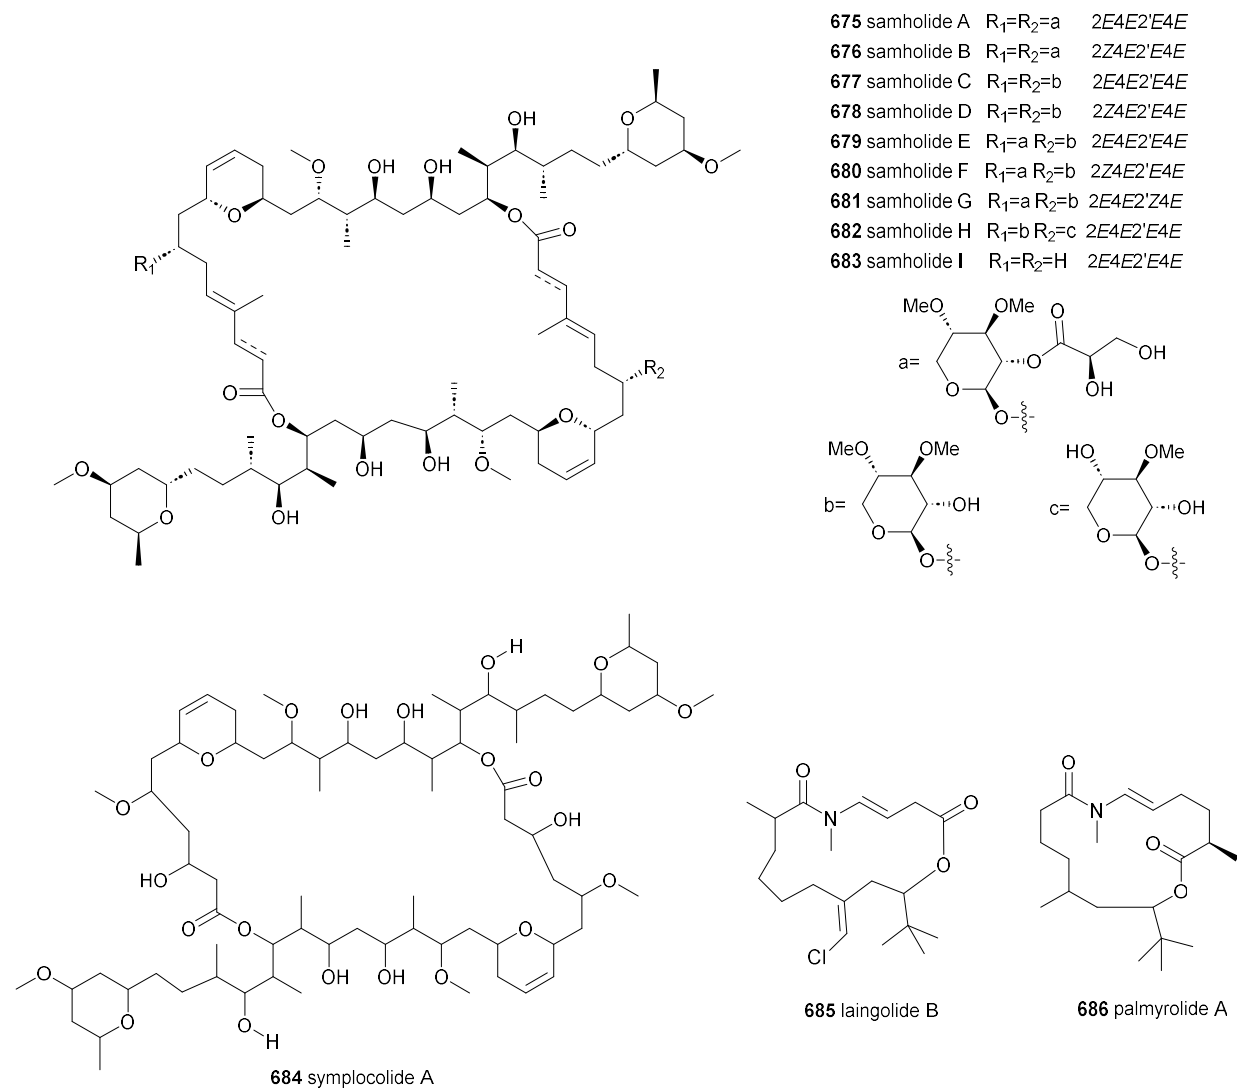

Table S2. (continued)

| #    | Compound               | Habitat | Producing organism              | DOI                          |
|------|------------------------|---------|---------------------------------|------------------------------|
| 687* | sanctolide A           | F       | <i>Oscillatoria sancta</i>      | 10.1016/j.tetlet.2012.04.136 |
| 688* | kanamienamide          | M       | <i>Moorea bouillonii</i>        | 10.1021/acs.orglett.6b02364  |
| 689  | tricholide A           | M       | <i>Trichodesmium thiebautii</i> | 10.3390/md15070206           |
| 690  | tricholide B           | M       | <i>Trichodesmium thiebautii</i> | 10.3390/md15070206           |
| 691  | looekeyolide A         | M       | <i>Roseofilum reptotaenium</i>  | 10.1021/acs.jnatprod.8b00804 |
| 692  | looekeyolide B         | M       | <i>Roseofilum reptotaenium</i>  | 10.1021/acs.jnatprod.8b00804 |
| 693  | looekeyolide C         | M       | <i>Roseofilum</i> sp.           | 10.3390/md21020076           |
| 694  | looekeyolide D         | M       | <i>Roseofilum</i> sp.           | 10.3390/md21020076           |
| 695  | cylindrocyclophane A4  | F       | <i>Nostoc</i> sp.               | 10.1021/np100352e            |
| 696  | cylindrocyclophane A3  | F       | <i>Nostoc</i> sp.               | 10.1021/np100352e            |
| 697  | cylindrocyclophane A2  | F       | <i>Nostoc</i> sp.               | 10.1021/np100352e            |
| 698  | cylindrocyclophane A1  | F       | <i>Nostoc</i> sp.               | 10.1021/np100352e            |
| 699  | cylindrocyclophane C4  | F       | <i>Nostoc</i> sp.               | 10.1021/np100352e            |
| 700  | cylindrocyclophane C3  | F       | <i>Nostoc</i> sp.               | 10.1021/np100352e            |
| 701  | cylindrocyclophane C2  | F       | <i>Nostoc</i> sp.               | 10.1021/np100352e            |
| 702  | cylindrocyclophane C1  | F       | <i>Nostoc</i> sp.               | 10.1021/np100352e            |
| 703  | cylindrocyclophane F4  | F       | <i>Nostoc</i> sp.               | 10.1021/np100352e            |
| 704  | cylindrocyclophane AB4 | F       | <i>Nostoc</i> sp.               | 10.1021/np100352e            |

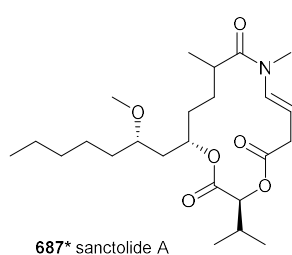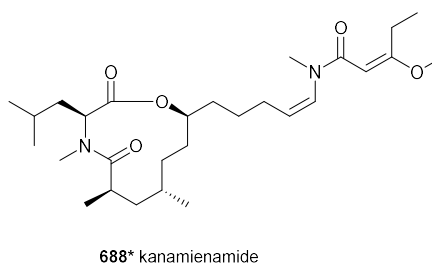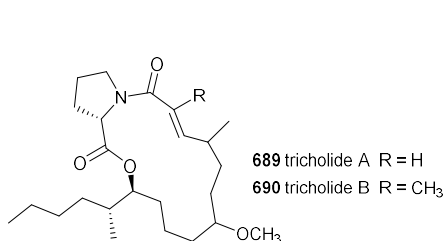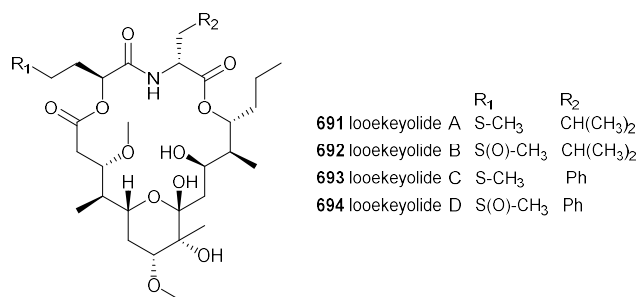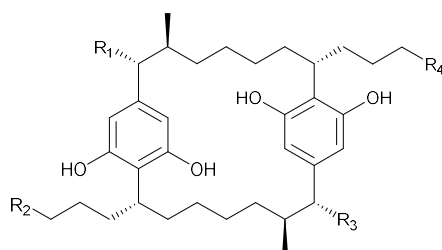

|                            |                     |                                     |                     |                                     |
|----------------------------|---------------------|-------------------------------------|---------------------|-------------------------------------|
| 695 cylindrocyclophane A4  | R <sub>1</sub> = OH | R <sub>2</sub> = CHCl <sub>2</sub>  | R <sub>3</sub> = OH | R <sub>4</sub> = CHCl <sub>2</sub>  |
| 696 cylindrocyclophane A3  | R <sub>1</sub> = OH | R <sub>2</sub> = CH <sub>2</sub> Cl | R <sub>3</sub> = OH | R <sub>4</sub> = CHCl <sub>2</sub>  |
| 697 cylindrocyclophane A2  | R <sub>1</sub> = OH | R <sub>2</sub> = CH <sub>3</sub>    | R <sub>3</sub> = OH | R <sub>4</sub> = CHCl <sub>2</sub>  |
| 698 cylindrocyclophane A1  | R <sub>1</sub> = OH | R <sub>2</sub> = CH <sub>3</sub>    | R <sub>3</sub> = OH | R <sub>4</sub> = CH <sub>2</sub> Cl |
| 699 cylindrocyclophane C4  | R <sub>1</sub> = OH | R <sub>2</sub> = CHCl <sub>2</sub>  | R <sub>3</sub> = H  | R <sub>4</sub> = CHCl <sub>2</sub>  |
| 700 cylindrocyclophane C3  | R <sub>1</sub> = OH | R <sub>2</sub> = CH <sub>2</sub> Cl | R <sub>3</sub> = H  | R <sub>4</sub> = CHCl <sub>2</sub>  |
| 701 cylindrocyclophane C2  | R <sub>1</sub> = OH | R <sub>2</sub> = CH <sub>3</sub>    | R <sub>3</sub> = H  | R <sub>4</sub> = CHCl <sub>2</sub>  |
| 702 cylindrocyclophane C1  | R <sub>1</sub> = OH | R <sub>2</sub> = CH <sub>3</sub>    | R <sub>3</sub> = H  | R <sub>4</sub> = CH <sub>2</sub> Cl |
| 703 cylindrocyclophane F4  | R <sub>1</sub> = H  | R <sub>2</sub> = CHCl <sub>2</sub>  | R <sub>3</sub> = H  | R <sub>4</sub> = CHCl <sub>2</sub>  |
| 704 cylindrocyclophane AB4 | R <sub>1</sub> = OH | R <sub>2</sub> = CHBr <sub>2</sub>  | R <sub>3</sub> = OH | R <sub>4</sub> = CHBr <sub>2</sub>  |

Table S2. (continued)

| #   | Compound              | Habitat | Producing organism              | DOI                             |
|-----|-----------------------|---------|---------------------------------|---------------------------------|
| 705 | merocyclophane A      | F       | <i>Nostoc</i> sp.               | 10.1016/j.phytochem.2012.03.005 |
| 706 | merocyclophane B      | F       | <i>Nostoc</i> sp.               | 10.1016/j.phytochem.2012.03.005 |
| 707 | merocyclophane C      | F       | <i>Nostoc</i> sp.               | 10.1021/acs.jnatprod.6b01175    |
| 708 | merocyclophane D      | F       | <i>Nostoc</i> sp.               | 10.1021/acs.jnatprod.6b01175    |
| 709 | carbamidocyclophane F | F       | <i>Nostoc</i> sp.               | 10.1016/j.tetlet.2013.11.112    |
| 710 | carbamidocyclophane G | F       | <i>Nostoc</i> sp.               | 10.1016/j.tetlet.2013.11.112    |
| 711 | carbamidocyclophane H | F       | <i>Nostoc</i> sp.               | 10.1038/ja.2014.118             |
| 712 | carbamidocyclophane I | F       | <i>Nostoc</i> sp.               | 10.1038/ja.2014.118             |
| 713 | carbamidocyclophane J | F       | <i>Nostoc</i> sp.               | 10.1038/ja.2014.118             |
| 714 | carbamidocyclophane K | F       | <i>Nostoc</i> sp.               | 10.1038/ja.2014.118             |
| 715 | carbamidocyclophane L | F       | <i>Nostoc</i> sp.               | 10.1038/ja.2014.118             |
| 716 | carbamidocyclophane M | F       | <i>Nostoc</i> sp.               | 10.3390/md14010021              |
| 717 | carbamidocyclophane N | F       | <i>Nostoc</i> sp.               | 10.3390/md14010021              |
| 718 | carbamidocyclophane O | F       | <i>Nostoc</i> sp.               | 10.3390/md14010021              |
| 719 | carbamidocyclophane P | F       | <i>Nostoc</i> sp.               | 10.3390/md14010021              |
| 720 | carbamidocyclophane Q | F       | <i>Nostoc</i> sp.               | 10.3390/md14010021              |
| 721 | carbamidocyclophane R | F       | <i>Nostoc</i> sp.               | 10.3390/md14010021              |
| 722 | carbamidocyclophane S | F       | <i>Nostoc</i> sp.               | 10.3390/md14010021              |
| 723 | carbamidocyclophane T | F       | <i>Nostoc</i> sp.               | 10.3390/md14010021              |
| 724 | carbamidocyclophane U | F       | <i>Nostoc</i> sp.               | 10.3390/md14010021              |
| 725 | carbamidocyclophane V | F       | <i>Cylindrospermum stagnale</i> | 10.1016/j.phytochem.2020.112529 |

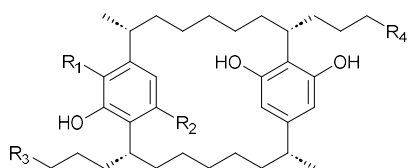

|                      | R <sub>1</sub> | R <sub>2</sub> | R <sub>3</sub>     | R <sub>4</sub>     |
|----------------------|----------------|----------------|--------------------|--------------------|
| 705 merocyclophane A | H              | OH             | CH <sub>3</sub>    | CH <sub>3</sub>    |
| 706 merocyclophane B | O              | O              | CH <sub>3</sub>    | CH <sub>3</sub>    |
| 707 merocyclophane C | H              | OH             | CH <sub>3</sub>    | CH <sub>2</sub> OH |
| 708 merocyclophane D | H              | OH             | CH <sub>2</sub> OH | CH <sub>2</sub> OH |

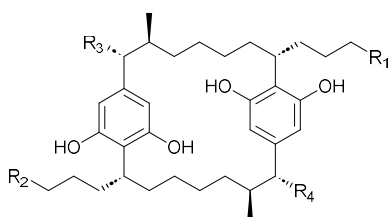

|                           | R <sub>1</sub>     | R <sub>2</sub>     | R <sub>3</sub>     | R <sub>4</sub>     |
|---------------------------|--------------------|--------------------|--------------------|--------------------|
| 709 carbamidocyclophane F | CHCl <sub>2</sub>  | CHCl <sub>2</sub>  | OH                 | OCONH <sub>2</sub> |
| 710 carbamidocyclophane G | CHCl <sub>2</sub>  | CHCl <sub>2</sub>  | OCOCH <sub>3</sub> | OCONH <sub>2</sub> |
| 711 carbamidocyclophane H | CH <sub>3</sub>    | CH <sub>3</sub>    | OCONH <sub>2</sub> | OH                 |
| 712 carbamidocyclophane I | CH <sub>2</sub> Cl | CH <sub>3</sub>    | OCONH <sub>2</sub> | OH                 |
| 713 carbamidocyclophane J | CH <sub>2</sub> Cl | CH <sub>2</sub> Cl | OCONH <sub>2</sub> | OCONH <sub>2</sub> |
| 714 carbamidocyclophane K | CHCl <sub>2</sub>  | CH <sub>3</sub>    | OCONH <sub>2</sub> | OH                 |
| 715 carbamidocyclophane L | CHCl <sub>2</sub>  | CH <sub>2</sub> Cl | OCONH <sub>2</sub> | OH                 |

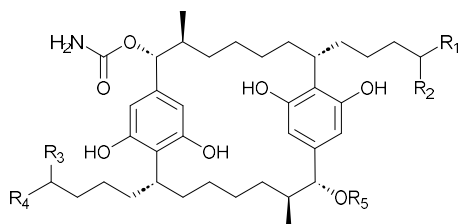

|                           | R <sub>1</sub> | R <sub>2</sub> | R <sub>3</sub> | R <sub>4</sub> | R <sub>5</sub>    |
|---------------------------|----------------|----------------|----------------|----------------|-------------------|
| 716 carbamidocyclophane M | Br             | H              | H              | H              | CONH <sub>2</sub> |
| 717 carbamidocyclophane N | Br             | H              | Br             | H              | CONH <sub>2</sub> |
| 718 carbamidocyclophane O | Br             | Br             | H              | H              | CONH <sub>2</sub> |
| 719 carbamidocyclophane P | Br             | Br             | Br             | H              | CONH <sub>2</sub> |
| 720 carbamidocyclophane Q | Br             | Br             | Br             | Br             | CONH <sub>2</sub> |
| 721 carbamidocyclophane R | Br             | H              | H              | H              | H                 |
| 722 carbamidocyclophane S | Br             | Br             | H              | H              | H                 |
| 723 carbamidocyclophane T | Br             | Br             | Br             | H              | H                 |
| 724 carbamidocyclophane U | Br             | Br             | Br             | Br             | H                 |
| 725 carbamidocyclophane V | Cl             | Cl             | Cl             | Cl             | CONH <sub>2</sub> |

Table S2. (continued)

| #   | Compound                  | Habitat | Producing organism              | DOI                             |
|-----|---------------------------|---------|---------------------------------|---------------------------------|
| 726 | carbamidocylindrofridin A | F       | <i>Cylindrospermum stagnale</i> | 10.1016/j.phytochem.2020.112529 |
| 727 | ribocyclophane A          | F       | <i>Nostoc</i> sp.               | 10.1021/acs.jnatprod.7b00954    |
| 728 | ribocyclophane B          | F       | <i>Nostoc</i> sp.               | 10.1021/acs.jnatprod.7b00954    |
| 729 | ribocyclophane C          | F       | <i>Nostoc</i> sp.               | 10.1021/acs.jnatprod.7b00954    |
| 730 | ribocyclophane D          | F       | <i>Nostoc</i> sp.               | 10.1021/acs.jnatprod.7b00954    |
| 731 | ribocyclophane E          | F       | <i>Nostoc</i> sp.               | 10.1021/acs.jnatprod.7b00954    |
| 732 | nostocyclophane E         | F       | <i>Nostoc linckia</i>           | 10.3390/md21020101              |
| 733 | nostocyclophane F         | F       | <i>Nostoc linckia</i>           | 10.3390/md21020101              |
| 734 | nostocyclophane G         | F       | <i>Nostoc linckia</i>           | 10.3390/md21020101              |
| 735 | nostocyclophane H         | F       | <i>Nostoc linckia</i>           | 10.3390/md21020101              |
| 736 | nostocyclophane I         | F       | <i>Nostoc linckia</i>           | 10.3390/md21020101              |
| 737 | nostocyclophane J         | F       | <i>Nostoc linckia</i>           | 10.3390/md21020101              |

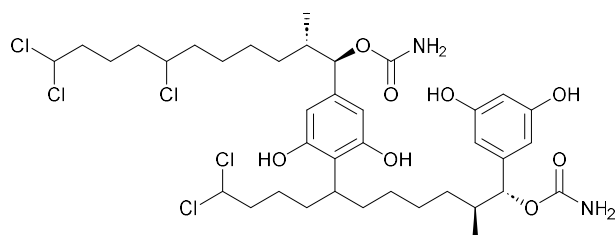

726 carbamidocylindrofridin A

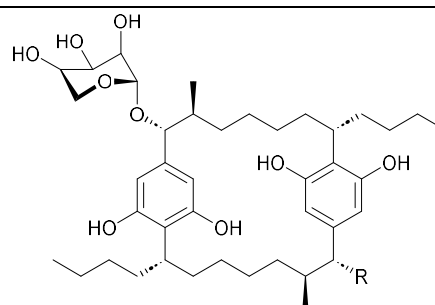

727 ribocyclophane A R = B-D-ribofuranose

728 ribocyclophane B R = OH

729 ribocyclophane C R = H

730 ribocyclophane D R = OAc

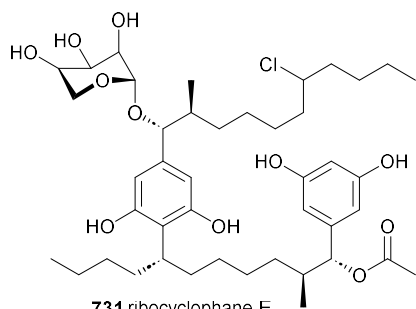

731 ribocyclophane E

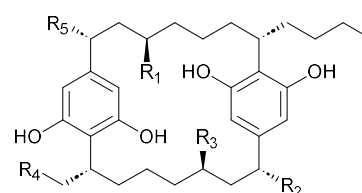R<sub>1</sub> R<sub>2</sub> R<sub>3</sub> R<sub>4</sub> R<sub>5</sub>

732 nostocyclophane E Cl OMe H Pr OMe

733 nostocyclophane F Cl OH H Pr OMe

734 nostocyclophane G Cl H Cl Pr OMe

735 nostocyclophane H Cl OMe Cl Me OMe

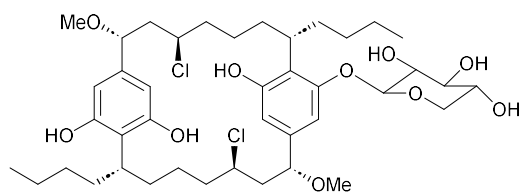

736 nostocyclophane I

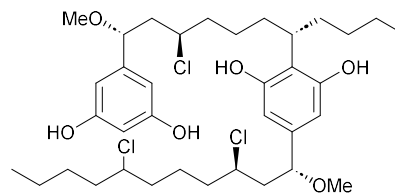

737 nostocyclophane J



Table S2. (continued)

| #   | Compound         | Habitat | Producing organism              | DOI                          |
|-----|------------------|---------|---------------------------------|------------------------------|
| 738 | cylindrofridin A | F       | <i>Cylindrospermum stagnale</i> | 10.1021/acs.jnatprod.5b00768 |
| 739 | cylindrofridin B | F       | <i>Cylindrospermum stagnale</i> | 10.1021/acs.jnatprod.5b00768 |
| 740 | cylindrofridin C | F       | <i>Cylindrospermum stagnale</i> | 10.1021/acs.jnatprod.5b00768 |

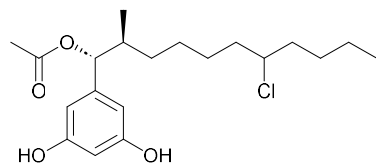

738 cylindrofridin A

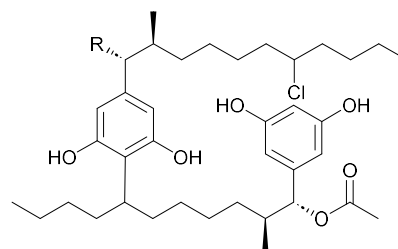739 cylindrofridin B R = OH  
740 cylindrofridin C R = OCOCH<sub>3</sub>

**Table S3. Acyl amides, fatty acid derivatives, and related compounds from cyanobacteria (2010-2023)**

| #    | Compound        | Habitat | Producing organism      | DOI                     |
|------|-----------------|---------|-------------------------|-------------------------|
| 741  | luquilloamide A | M       | <i>Oscillatoria</i> sp. | 10.1021/acs.joc.1c02340 |
| 742  | luquilloamide C | M       | <i>Oscillatoria</i> sp. | 10.1021/acs.joc.1c02340 |
| 743  | luquilloamide D | M       | <i>Oscillatoria</i> sp. | 10.1021/acs.joc.1c02340 |
| 744  | luquilloamide E | M       | <i>Oscillatoria</i> sp. | 10.1021/acs.joc.1c02340 |
| 745  | luquilloamide F | M       | <i>Oscillatoria</i> sp. | 10.1021/acs.joc.1c02340 |
| 746  | luquilloamide G | M       | <i>Oscillatoria</i> sp. | 10.1021/acs.joc.1c02340 |
| 747* | luquilloamide B | M       | <i>Oscillatoria</i> sp. | 10.1021/acs.joc.1c02340 |

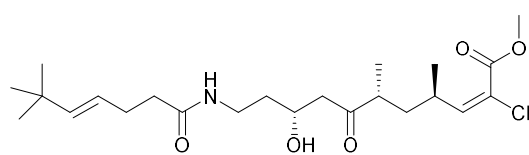

741 luquilloamide A

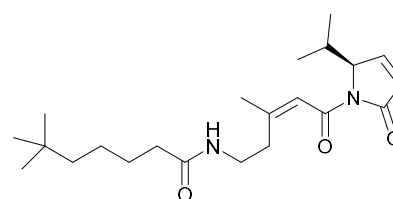

742 luquilloamide C

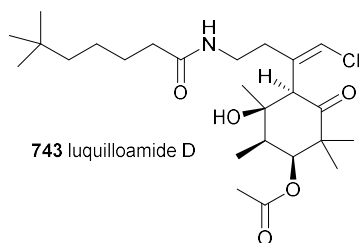

743 luquilloamide D

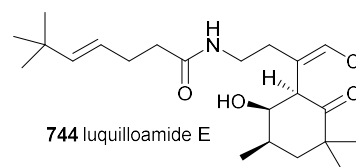

744 luquilloamide E

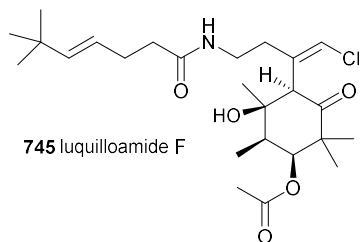

745 luquilloamide F

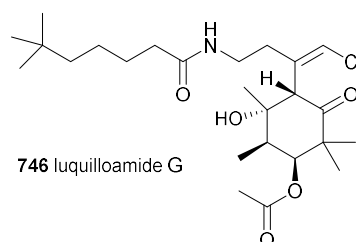

746 luquilloamide G

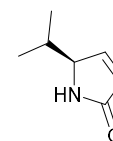

747\* luquilloamide B

Table S3. (continued)

| #    | Compound       | Habitat | Producing organism                                                  | DOI                          |
|------|----------------|---------|---------------------------------------------------------------------|------------------------------|
| 748  | beru'amide     | M       | <i>Okeania</i> sp.                                                  | 10.1021/acs.orglett.2c02013  |
| 749* | palmyrrolinone | M       | cf. <i>Oscillatoria</i> and <i>Hormoscilla</i><br>spp. (assemblage) | 10.1021/np200106b            |
| 750  | jamaicamide D  | M       | <i>Moorea producens</i>                                             | 10.1371/journal.pone.0133297 |
| 751  | jamaicamide E  | M       | <i>Moorea producens</i>                                             | 10.1371/journal.pone.0133297 |
| 752  | jamaicamide F  | M       | <i>Moorea producens</i>                                             | 10.1371/journal.pone.0133297 |
| 753  | smenamamide C  | M       | <i>Trichodesmium</i> sp.                                            | 10.3389/fchem.2018.00316     |
| 754  | smenamamide D  | M       | <i>Trichodesmium</i> sp.                                            | 10.3389/fchem.2018.00316     |
| 755  | smenamamide E  | M       | <i>Trichodesmium</i> sp.                                            | 10.3389/fchem.2018.00316     |
| 756* | hoshinolactam  | M       | <i>Oscillatoria</i> sp.                                             | 10.1021/acs.orglett.7b00047  |

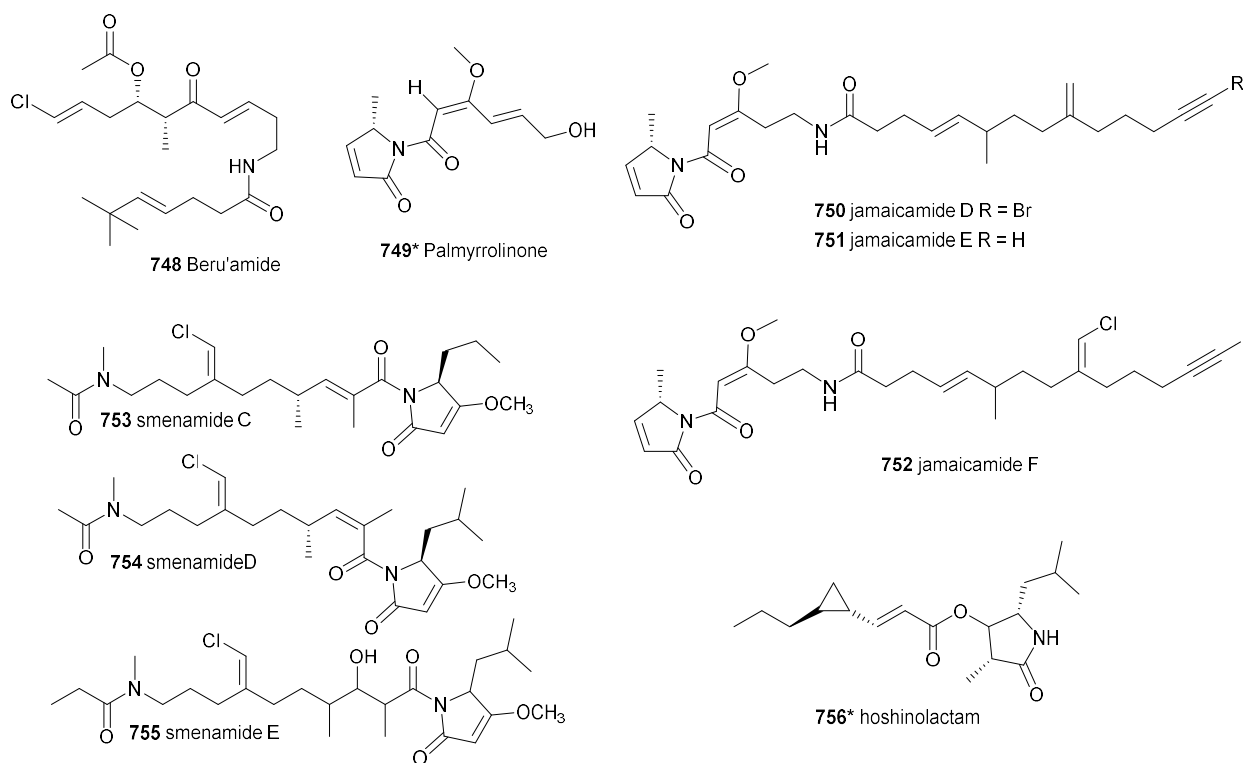

Table S3. (continued)

| #   | Compound        | Habitat | Producing organism        | DOI                                               |
|-----|-----------------|---------|---------------------------|---------------------------------------------------|
| 757 | doscadenamide A | M       | <i>Moorena bouillonii</i> | 10.3390/md18100515<br>10.1021/acs.orglett.9b02525 |
| 758 | doscadenamide B | M       | <i>Moorena bouillonii</i> | 10.1021/acs.jnatprod.0c01003                      |
| 759 | doscadenamide C | M       | <i>Moorena bouillonii</i> | 10.1021/acs.jnatprod.0c01003                      |
| 760 | doscadenamide D | M       | <i>Moorena bouillonii</i> | 10.1021/acs.jnatprod.0c01003                      |
| 761 | doscadenamide E | M       | <i>Moorena bouillonii</i> | 10.1021/acs.jnatprod.0c01003                      |
| 762 | doscadenamide F | M       | <i>Moorena bouillonii</i> | 10.1021/acs.jnatprod.0c01003                      |
| 763 | doscadenamide G | M       | <i>Moorena bouillonii</i> | 10.1021/acs.jnatprod.0c01003                      |
| 764 | doscadenamide H | M       | <i>Moorena bouillonii</i> | 10.1021/acs.jnatprod.0c01003                      |
| 765 | doscadenamide I | M       | <i>Moorena bouillonii</i> | 10.1021/acs.jnatprod.0c01003                      |
| 766 | doscadenamide J | M       | <i>Moorena bouillonii</i> | 10.1021/acs.jnatprod.0c01003                      |

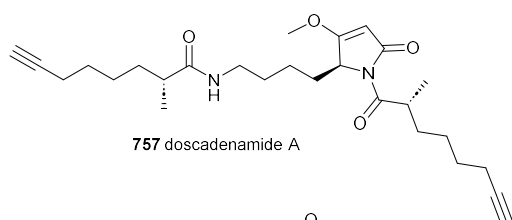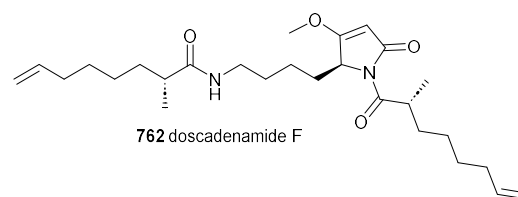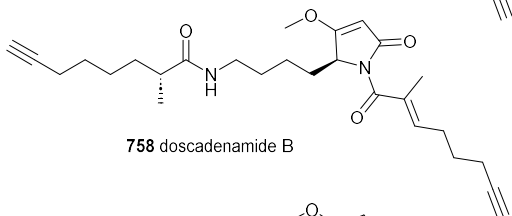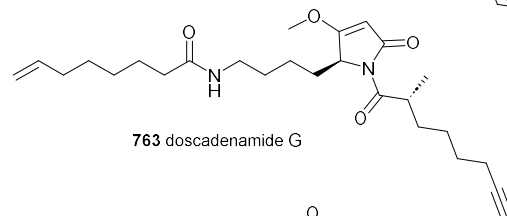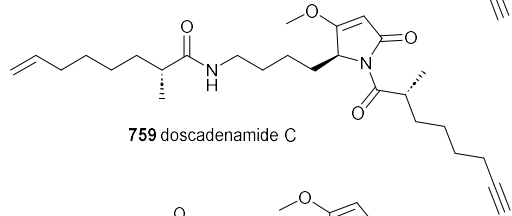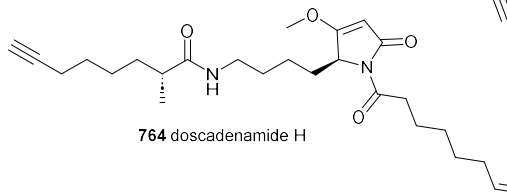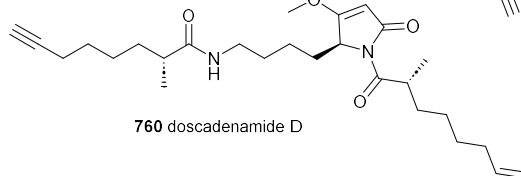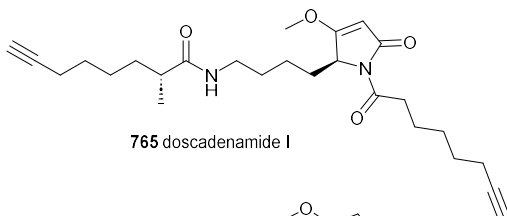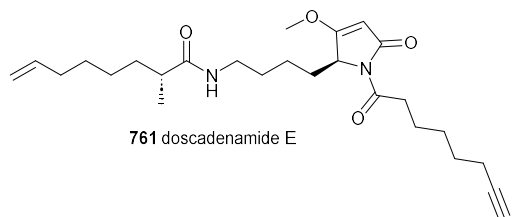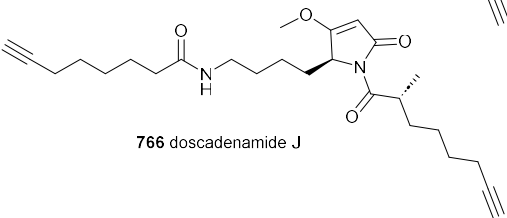

Table S3. (continued)

| #    | Compound          | Habitat | Producing organism                    | DOI                          |
|------|-------------------|---------|---------------------------------------|------------------------------|
| 767  | ethyl tumonoate A | M       | cf. <i>Oscillatoria margaritifera</i> | 10.1021/np200236c            |
| 768  | okeaniamide A     | M       | <i>Okeania</i> sp.                    | 10.1021/acs.jnatprod.3c00256 |
| 769  | okeaniamide B     | M       | <i>Okeania</i> sp.                    | 10.1021/acs.jnatprod.3c00256 |
| 770* | laucysteinamide A | M       | cf. <i>Caldora penicillata</i>        | 10.3390/md15040121           |
| 771* | caldorazole       | M       | <i>Caldora</i> sp.                    | 10.1021/acs.orglett.2c01566  |
| 772  | fischerazole A    | F       | <i>Fischerella</i> sp.                | 10.26434/chemrxiv-2022-v8zlp |
| 773  | fischerazole B    | F       | <i>Fischerella</i> sp.                | 10.26434/chemrxiv-2022-v8zlp |
| 774  | fischerazole C    | F       | <i>Fischerella</i> sp.                | 10.26434/chemrxiv-2022-v8zlp |

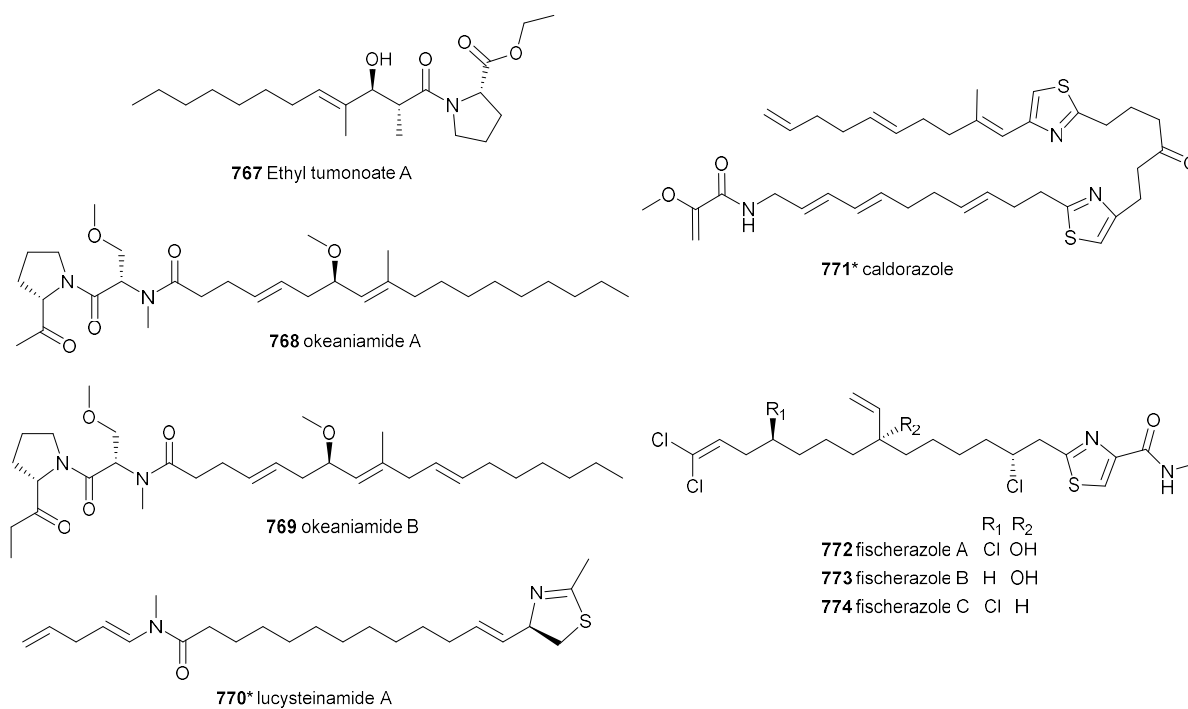

Table S3. (continued)

| #    | Compound         | Habitat | Producing organism              | DOI                          |
|------|------------------|---------|---------------------------------|------------------------------|
| 775  | aranazole A      | F       | <i>Fischerella</i> sp.          | 10.1021/acs.orglett.8b02193  |
| 776  | aranazole B      | F       | <i>Fischerella</i> sp.          | 10.1021/acs.orglett.8b02193  |
| 777  | aranazole C      | F       | <i>Fischerella</i> sp.          | 10.1021/acs.orglett.8b02193  |
| 778  | aranazole D      | F       | <i>Fischerella</i> sp.          | 10.1021/acs.orglett.8b02193  |
| 779* | trichothiazole A | M       | <i>Trichodesmium</i> sp.        | 10.1016/j.tetlet.2017.09.027 |
| 780  | trichotoxin A    | M       | <i>Trichodesmium thiebautii</i> | 10.1021/es201034r            |
| 781  | trichotoxin B    | M       | <i>Trichodesmium thiebautii</i> | 10.1016/j.tetlet.2016.11.062 |

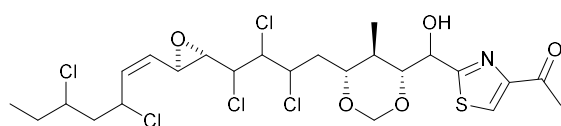

775 aranazole A

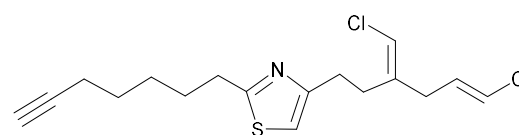

779\* trichothiazole A

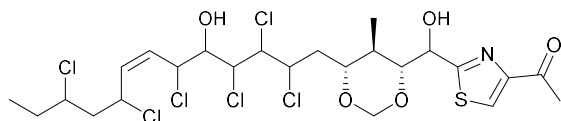

776 aranazole B

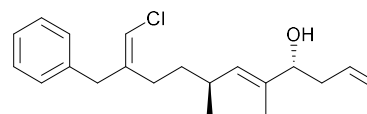

780 Trichotoxin A

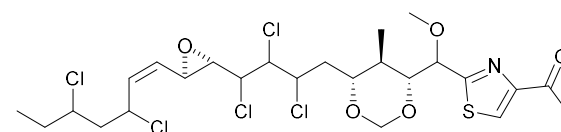

777 aranazole C

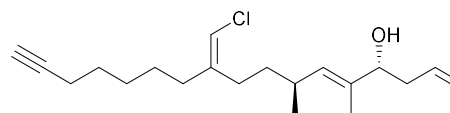

781 Trichotoxin B

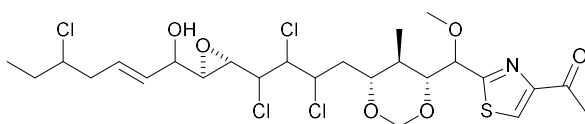

778 aranazole D

Table S3. (continued)

| #    | Compound       | Habitat | Producing organism              | DOI                          |
|------|----------------|---------|---------------------------------|------------------------------|
| 782  | trichophycin A | M       | <i>Trichodesmium thiebautii</i> | 10.3390/md15010010           |
| 783* | trichophycin B | M       | <i>Trichodesmium</i> sp.        | 10.1021/acs.joc.8b02070      |
| 784  | trichophycin C | M       | <i>Trichodesmium</i> sp.        | 10.1021/acs.joc.8b02070      |
| 785  | trichophycin D | M       | <i>Trichodesmium</i> sp.        | 10.1021/acs.joc.8b02070      |
| 786  | trichophycin E | M       | <i>Trichodesmium</i> sp.        | 10.1021/acs.joc.8b02070      |
| 787* | trichophycin F | M       | <i>Trichodesmium</i> sp.        | 10.1021/acs.joc.8b02070      |
| 788  | trichophycin G | M       | <i>Trichodesmium thiebautii</i> | 10.1021/acs.jnatprod.0c00550 |
| 789  | trichophycin H | M       | <i>Trichodesmium thiebautii</i> | 10.1021/acs.jnatprod.0c00550 |
| 790  | trichophycin I | M       | <i>Trichodesmium thiebautii</i> | 10.1021/acs.jnatprod.0c00550 |

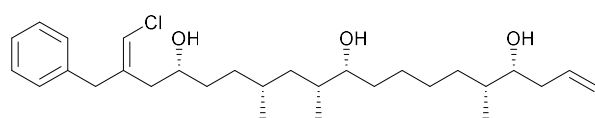

782 trichophycin A

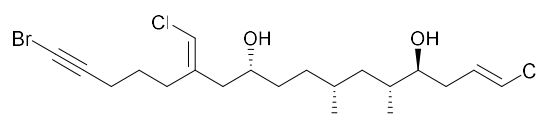

786 trichophycin E

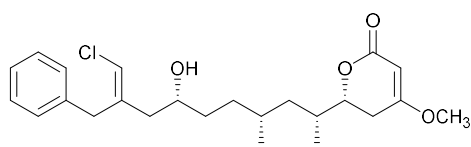

783\* trichophycin B

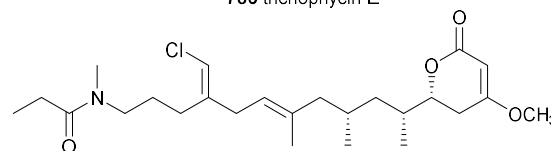

787\* trichophycin F

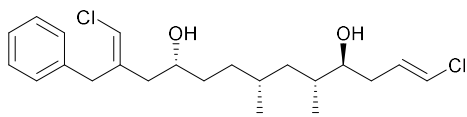

784 trichophycin C

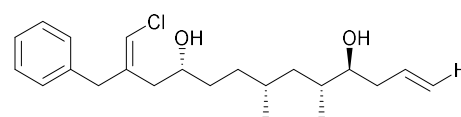

788 trichophycin G

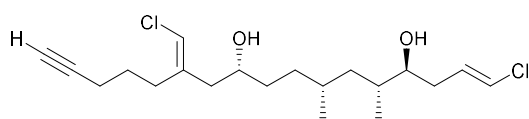

785 trichophycin D

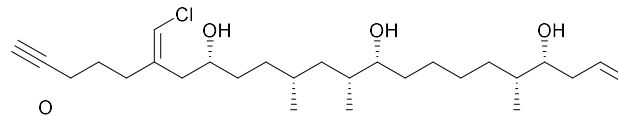

789 trichophycin H

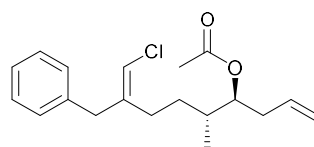

790 trichophycin I

Table S3. (continued)

| #    | Compound          | Habitat | Producing organism              | DOI                          |
|------|-------------------|---------|---------------------------------|------------------------------|
| 791  | isotrichophycin C | M       | <i>Trichodesmium thiebautii</i> | 10.1021/acs.jnatprod.0c00550 |
| 792* | tricholactone     | M       | <i>Trichodesmium</i> sp.        | 10.1021/acs.joc.8b02070      |
| 793  | taveuniamide L    | M       | <i>Symploca</i> sp.             | 10.3390/md22010028           |
| 794  | taveuniamide M    | M       | <i>Symploca</i> sp.             | 10.3390/md22010028           |
| 795  | taveuniamide N    | M       | <i>Symploca</i> sp.             | 10.3390/md22010028           |

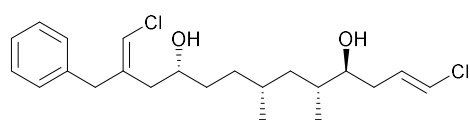

791 isotrichophycin C

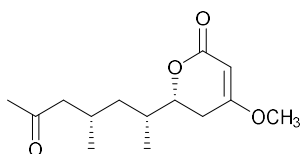

792\* tricholactone

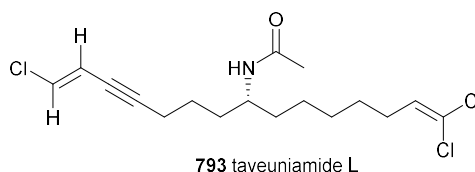

793 taveuniamide L

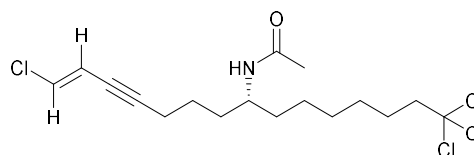

794 taveuniamide M

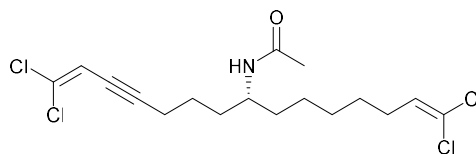

795 taveuniamide N



Table S3. (continued)

| #    | Compound        | Habitat | Producing organism          | DOI               |
|------|-----------------|---------|-----------------------------|-------------------|
| 796* | janthielamide A | M       | cf. <i>Symploca</i> sp.     | 10.1021/jo300160e |
| 797  | kimbeamide A    | M       | cf. <i>Symploca</i> sp.     | 10.1021/jo300160e |
| 798  | kimbeamide B    | M       | cf. <i>Symploca</i> sp.     | 10.1021/jo300160e |
| 799  | kimbeamide C    | M       | cf. <i>Symploca</i> sp.     | 10.1021/jo300160e |
| 800* | kimbelactone A  | M       | cf. <i>Symploca</i> sp.     | 10.1021/jo300160e |
| 801  | coibacin A      | M       | cf. <i>Oscillatoria</i> sp. | 10.1021/jo402339y |
| 802  | coibacin B      | M       | cf. <i>Oscillatoria</i> sp. | 10.1021/jo402339y |
| 803  | coibacin C      | M       | cf. <i>Oscillatoria</i> sp. | 10.1021/jo402339y |
| 804  | coibacin D      | M       | cf. <i>Oscillatoria</i> sp. | 10.1021/jo402339y |

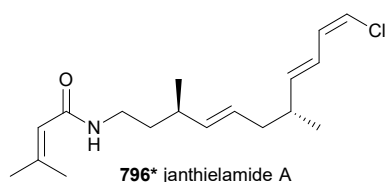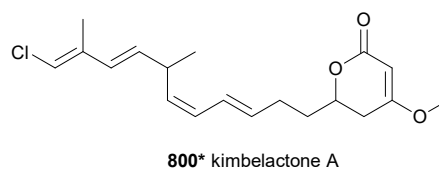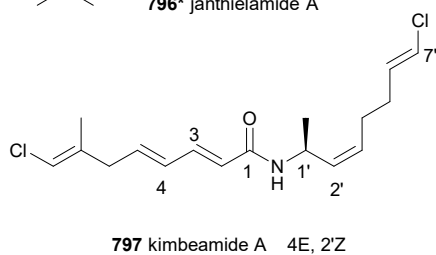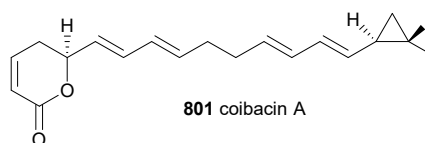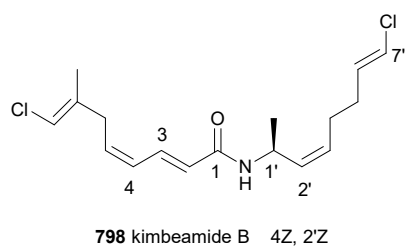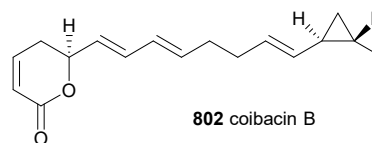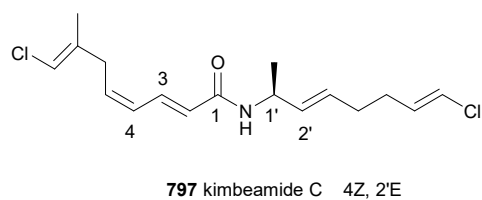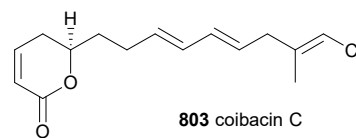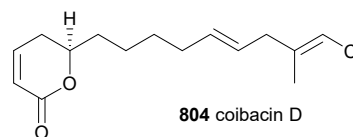

Table S3. (continued)

| #    | Compound          | Habitat | Producing organism             | DOI                             |
|------|-------------------|---------|--------------------------------|---------------------------------|
| 805* | malyngolide dimer | M       | <i>Lyngbya majuscula</i>       | 10.1021/np9005184               |
| 806* | honaucin A        | M       | <i>Leptolyngbya crossbyana</i> | 10.1016/j.chembiol.2012.03.014  |
| 807  | honaucin B        | M       | <i>Leptolyngbya crossbyana</i> | 10.1016/j.chembiol.2012.03.014  |
| 808  | honaucin C        | M       | <i>Leptolyngbya crossbyana</i> | 10.1016/j.chembiol.2012.03.014  |
| 809  | yoshinone A       | M       | <i>Leptolyngbya</i> sp.        | 10.1016/j.tetlet.2014.10.032    |
| 810  | yoshinone B1      | M       | <i>Leptolyngbya</i> sp.        | 10.1016/j.tetlet.2014.10.032    |
| 811  | yoshinone B2      | M       | <i>Leptolyngbya</i> sp.        | 10.1016/j.tetlet.2014.10.032    |
| 812  | kalkipyronone B   | M       | <i>Leptolyngbya</i> sp.        | 10.1016/j.phytochem.2015.11.011 |

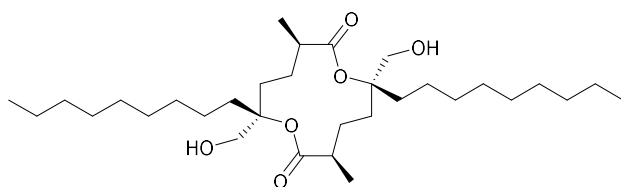

805\* malyngolide dimer

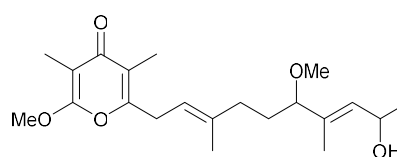

809 yoshinone A

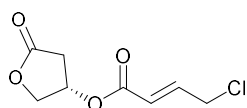

806\* honaucin A

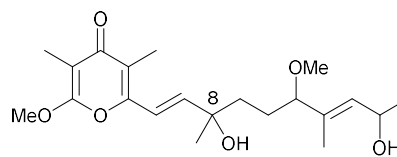

810 yoshinone B1 811 yoshinone B2 (diastereomers in 8)

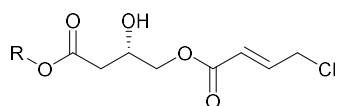807 honaucin B R = CH<sub>2</sub>CH<sub>3</sub>808 honaucin C R = CH<sub>3</sub>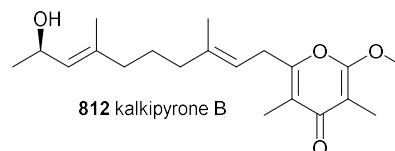

812 kalkipyronone B

Table S3. (continued)

| #   | Compound                                | Habitat | Producing organism         | DOI                             |
|-----|-----------------------------------------|---------|----------------------------|---------------------------------|
| 813 | 8- <i>epi</i> -malyngamide C            | M       | <i>Lyngbya majuscula</i>   | 10.1021/np900614n               |
| 814 | 8-O-acetyl-8- <i>epi</i> -malyngamide C | M       | <i>Lyngbya majuscula</i>   | 10.1016/j.phytochem.2010.07.001 |
| 815 | malyngamide 2                           | M       | cf. <i>Lyngbya sordida</i> | 10.1021/np1005407               |
| 816 | malyngamide 3                           | M       | <i>Lyngbya majuscula</i>   | 10.1021/np1008015               |
| 817 | isomalyngamide K                        | M       | <i>Lyngbya majuscula</i>   | 10.1016/j.molstruc.2011.01.012  |
| 818 | isomalyngamide A-1                      | M       | <i>Lyngbya majuscula</i>   | 10.1016/j.ejmech.2011.05.049    |
| 819 | malyngamide 4                           | M       | <i>Moorea producens</i>    | 10.1016/j.phytol.2013.01.002    |
| 820 | malyngamide Y                           | M       | <i>Moorea producens</i>    | 10.1080/14786419.2016.1207074   |

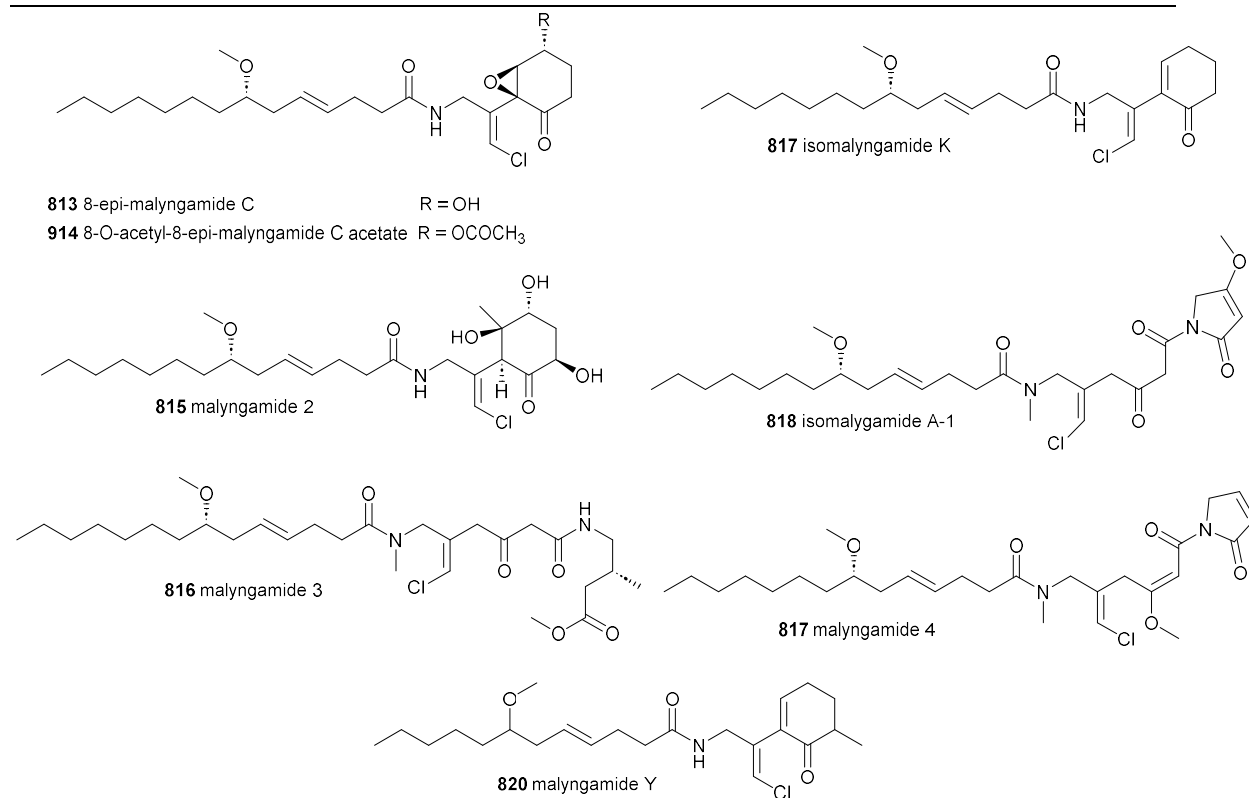

Table S3. (continued)

| #   | Compound                            | Habitat | Producing organism           | DOI                          |
|-----|-------------------------------------|---------|------------------------------|------------------------------|
| 821 | 6,8-di-O-acetylmalyngamide 2        | M       | <i>Moorea producens</i>      | 10.3390/md15120367           |
| 822 | 6-O-acetylmalyngamide 2             | M       | <i>Moorea producens</i>      | 10.3390/md15120367           |
| 823 | <i>N</i> -demethyl-isomalyngamide I | M       | <i>Moorea producens</i>      | 10.3390/md15120367           |
| 824 | credneramide A                      | M       | cf. <i>Trichodesmium</i> sp. | 10.1021/np200611f            |
| 825 | credneramide B                      | M       | cf. <i>Trichodesmium</i> sp. | 10.1021/np200611f            |
| 826 | 1 <i>E</i> -pitiamide B             | M       | <i>Hydrocoleum majus</i>     | 10.1055/s-0042-105157        |
| 827 | 1 <i>Z</i> -pitiamide B             | M       | <i>Hydrocoleum majus</i>     | 10.1055/s-0042-105157        |
| 828 | caracolamide A                      | M       | <i>Symploca</i> sp.          | 10.1021/acs.jnatprod.7b00367 |
| 829 | santacruzamate A                    | M       | cf. <i>Symploca</i> sp.      | 10.1021/np400198r            |

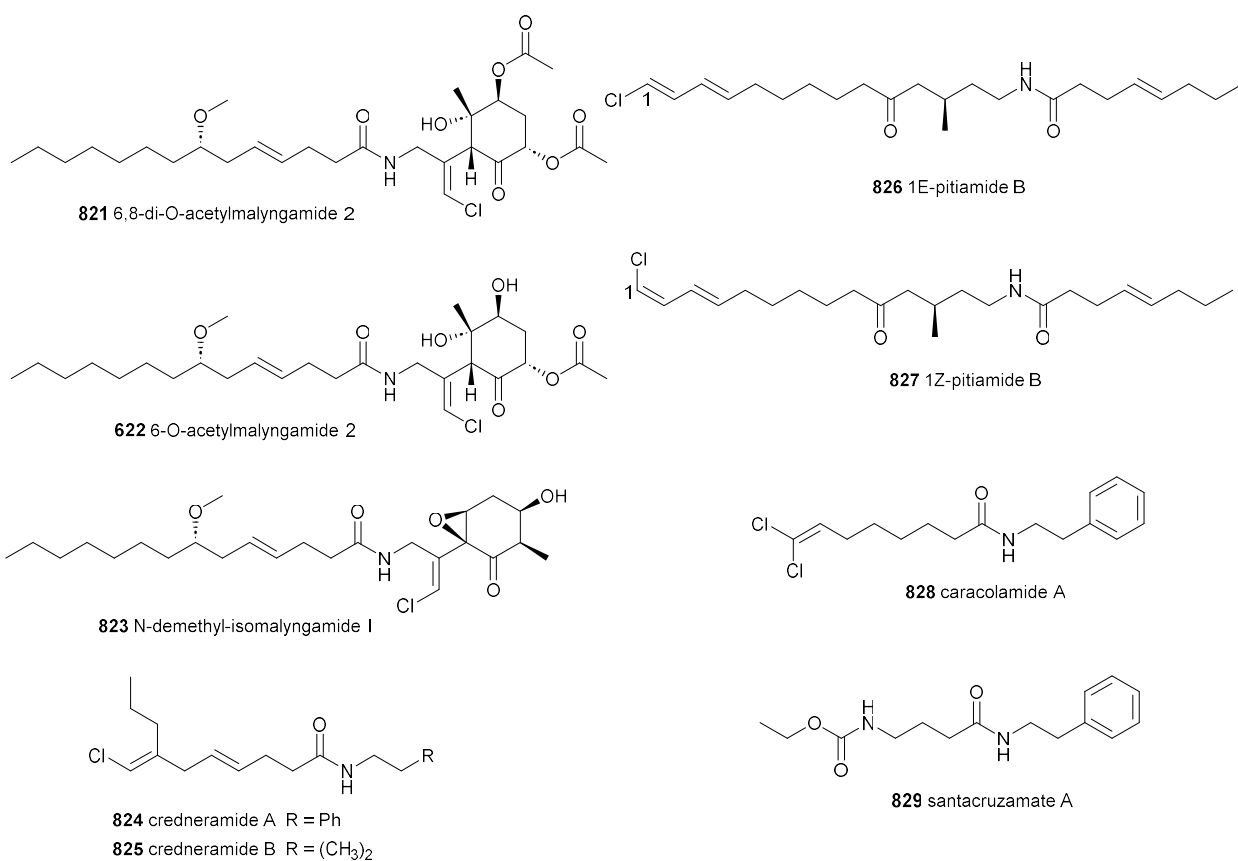

Table S3. (continued)

| #   | Compound         | Habitat | Producing organism     | DOI                          |
|-----|------------------|---------|------------------------|------------------------------|
| 830 | nocuolin A       | F       | <i>Nostoc</i> sp.      | 10.1371/journal.pone.0172850 |
| 831 | nocuolactylate A | F       | <i>Nodularia</i> sp.   | 10.1002/anie.202015105       |
| 832 | nocuolactylate B | F       | <i>Nodularia</i> sp.   | 10.1002/anie.202015105       |
| 833 | nocuolactylate C | F       | <i>Nodularia</i> sp.   | 10.1002/anie.202015105       |
| 834 | hapalosin C      | F       | <i>Fischerella</i> sp. | 10.1002/anie.202015105       |
| 835 | hapalosin D      | F       | <i>Fischerella</i> sp. | 10.1002/anie.202015105       |
| 836 | hapalosin E      | F       | <i>Fischerella</i> sp. | 10.1002/anie.202015105       |
| 837 | hapalosin F      | F       | <i>Fischerella</i> sp. | 10.1002/anie.202015105       |
| 838 | hapalosin G      | F       | <i>Fischerella</i> sp. | 10.1002/anie.202015105       |

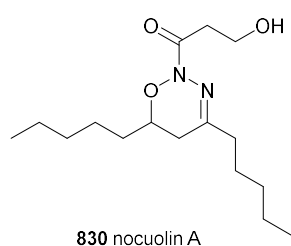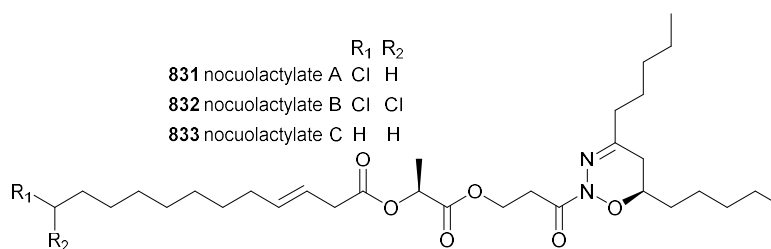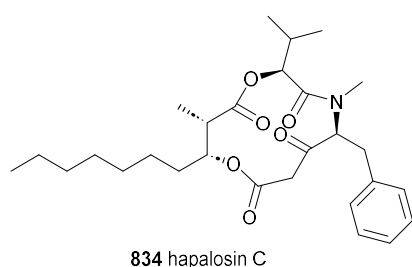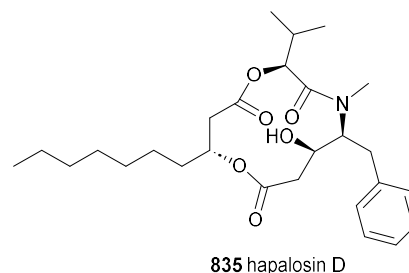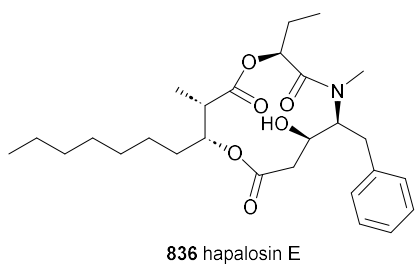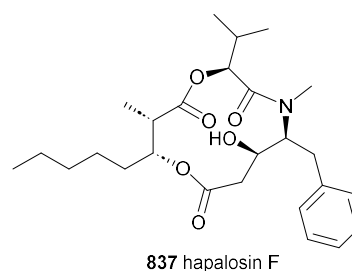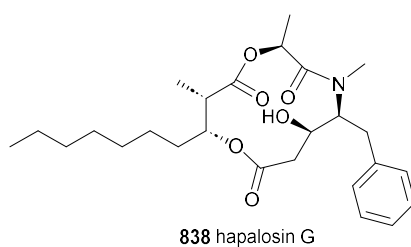

Table S3. (continued)

| #    | Compound         | Habitat | Producing organism       | DOI                          |
|------|------------------|---------|--------------------------|------------------------------|
| 839* | parguerene       | M       | <i>Moorea producens</i>  | 10.1021/np400347f            |
| 840  | calothrixamide A | F       | <i>Calothrix</i> sp.     | 10.1021/acs.jnatprod.8b00432 |
| 841  | calothrixamide B | F       | <i>Calothrix</i> sp.     | 10.1021/acs.jnatprod.8b00432 |
| 842* | mooreamide A     | M       | <i>Moorea bouillonii</i> | 10.1007/s11745-014-3949-9    |
| 843  | columbamide A    | M       | <i>Moorea bouillonii</i> | 10.1021/acs.jnatprod.5b00301 |
| 844  | columbamide B    | M       | <i>Moorea bouillonii</i> | 10.1021/acs.jnatprod.5b00301 |
| 845  | columbamide C    | M       | <i>Moorea bouillonii</i> | 10.1021/acs.jnatprod.5b00301 |
| 846  | columbamide D    | M       | <i>Moorea bouillonii</i> | 10.1021/acs.orglett.7b01869  |
| 847  | columbamide E    | M       | <i>Moorea bouillonii</i> | 10.1021/acs.orglett.7b01869  |
| 848  | columbamide F    | M       | <i>Moorea bouillonii</i> | 10.1021/acs.jnatprod.0c00164 |
| 849  | columbamide G    | M       | <i>Moorea bouillonii</i> | 10.1021/acs.jnatprod.0c00164 |
| 850  | columbamide H    | M       | <i>Moorea bouillonii</i> | 10.1021/acs.jnatprod.0c00164 |
| 851  | columbamide I    | M       | <i>Moorea bouillonii</i> | 10.1021/acschembio.2c00347   |
| 852  | columbamide J    | M       | <i>Moorea bouillonii</i> | 10.1021/acschembio.2c00347   |
| 853  | columbamide K    | M       | <i>Moorea bouillonii</i> | 10.1021/acschembio.2c00347   |
| 854  | columbamide L    | M       | <i>Moorea bouillonii</i> | 10.1021/acschembio.2c00347   |
| 855  | columbamide M    | M       | <i>Moorea bouillonii</i> | 10.1021/acschembio.2c00347   |

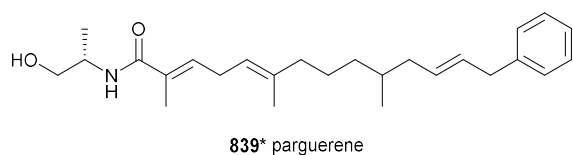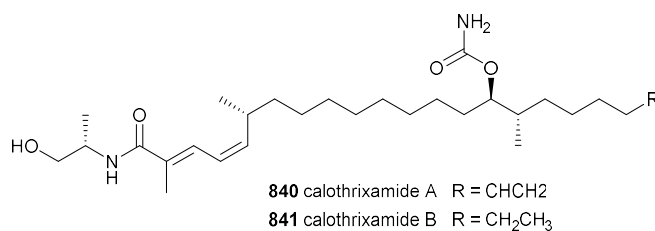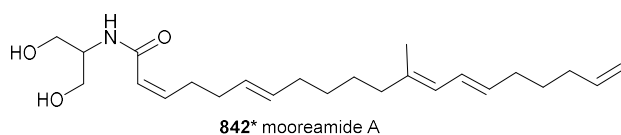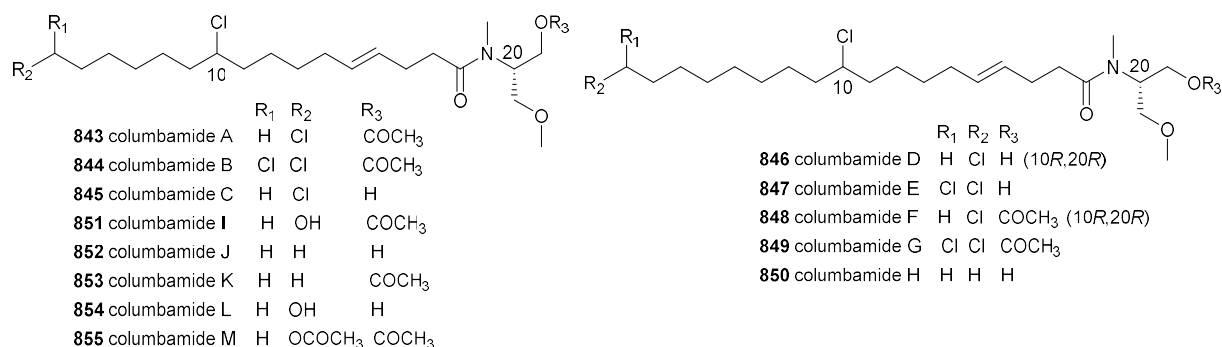

Table S3. (continued)

| #   | Compound                                  | Habitat | Producing organism                  | DOI                          |
|-----|-------------------------------------------|---------|-------------------------------------|------------------------------|
| 856 | serinolamide A                            | M       | <i>Lyngbya majuscula</i>            | 10.1021/np200610t            |
| 857 | serinolamide B                            | M       | <i>Lyngbya majuscula</i>            | 10.1002/cbic.201200502       |
| 858 | serinolamide C                            | M       | <i>Okeania</i> sp.                  | 10.1021/acs.jnatprod.7b00449 |
| 859 | serinolamide D                            | M       | <i>Okeania</i> sp.                  | 10.1021/acs.jnatprod.7b00449 |
| 860 | propenediester                            | M       | <i>Oscillatoria</i> sp.             | 10.1021/np200610t            |
| 861 | 2-hydroxyethyl-11-hydroxyhexadec-9-enoate | M       | <i>Leptolyngbya</i> sp.             | 10.1111/are.13043            |
| 862 | nostochopcerol                            | F       | <i>Nostochopsis lobatus</i>         | 10.3762/bjoc.19.13           |
| 863 | benderadiene                              | M       | cf. <i>Lyngbya</i> sp.              | 10.3390/molecules28093965    |
| 864 | lyngbyoic acid                            | M       | <i>Lyngbya</i> cf. <i>majuscula</i> | 10.1039/C0MB00180E           |

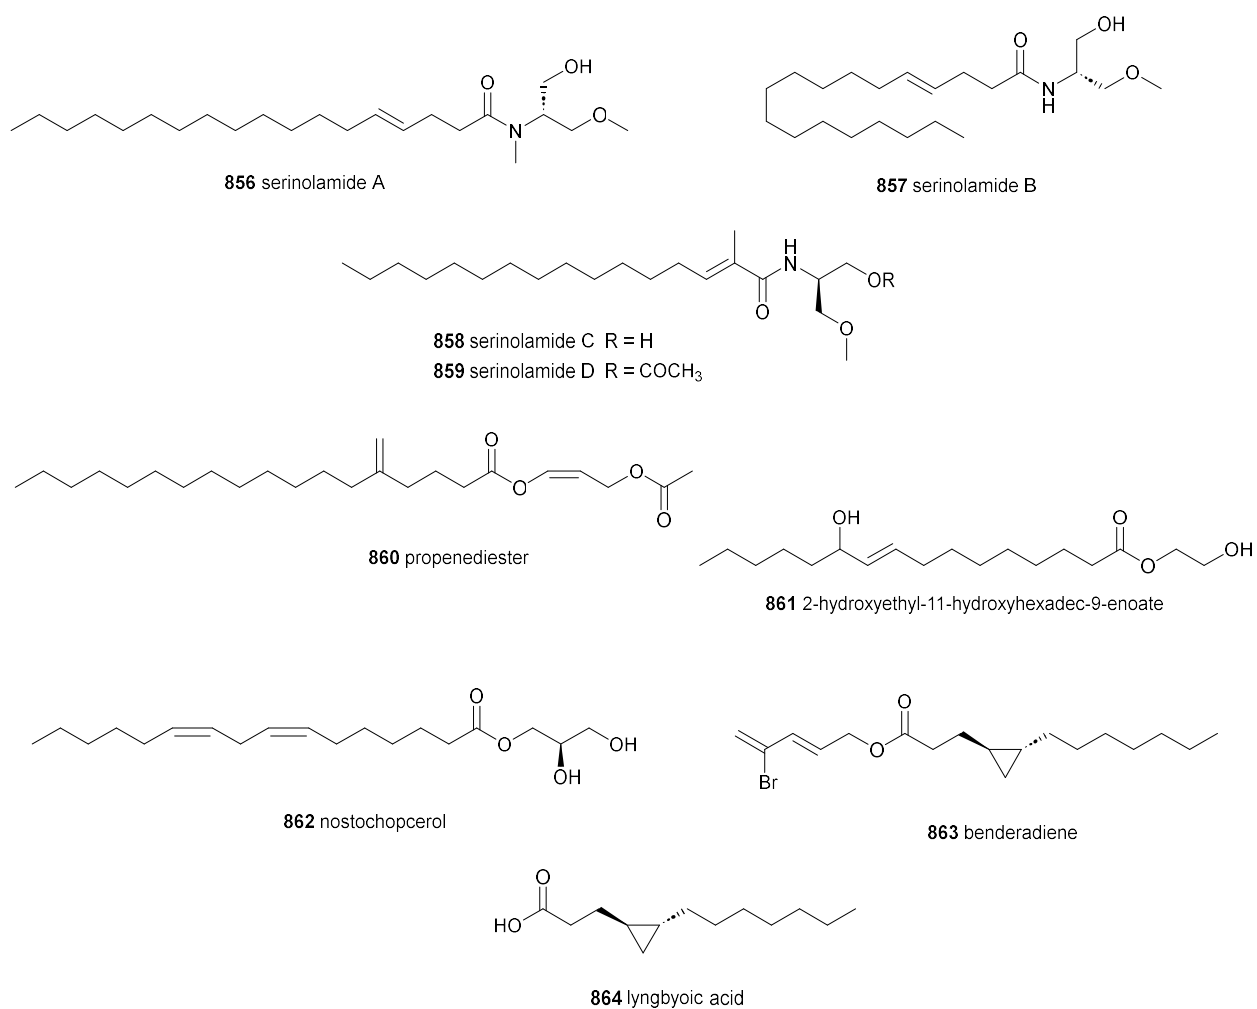

Table S3. (continued)

| #    | Compound                         | Habitat | Producing organism           | DOI                          |
|------|----------------------------------|---------|------------------------------|------------------------------|
| 865  | pitinoic acid A                  | M       | <i>Lyngbya</i> sp.           | 10.1021/ol401396u            |
| 866  | pitinoic acid B                  | M       | <i>Lyngbya</i> sp.           | 10.1021/ol401396u            |
| 867  | 7(E)-9-keto-hexadec-7-enoic acid | M       | n.r.                         | 10.3390/md21110553           |
| 868  | dysidazirine carboxylic acid     | M       | <i>Caldora</i> sp.           | 10.3390/molecules27051717    |
| 869  | 11-oxopalmitelaidic acid         | M       | <i>Leibleinia gracilis</i>   | 10.3390/metabo10050215       |
| 870  | puna'auic acid                   | M       | <i>Pseudanabaena</i> sp.     | 10.1021/acs.orglett.8b00654  |
| 871  | chlorosphaerolactylate A         | F       | <i>Sphaerospermopsis</i> sp. | 10.1021/acs.jnatprod.0c00072 |
| 872  | chlorosphaerolactylate B         | F       | <i>Sphaerospermopsis</i> sp. | 10.1021/acs.jnatprod.0c00072 |
| 873  | chlorosphaerolactylate C         | F       | <i>Sphaerospermopsis</i> sp. | 10.1021/acs.jnatprod.0c00072 |
| 874  | chlorosphaerolactylate D         | F       | <i>Sphaerospermopsis</i> sp. | 10.1021/acs.jnatprod.0c00072 |
| 875* | mooreaside A                     | M       | <i>Moorea producens</i>      | 10.3390/molecules21030324    |

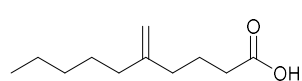

865 pitinoic acid A

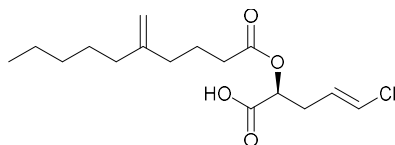

866 pitinoic acid B

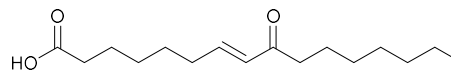

867 7(E)-9-keto-hexadec-7-enoic acid

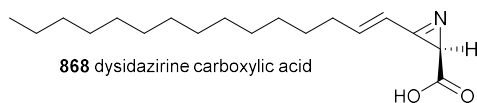

868 dysidazirine carboxylic acid

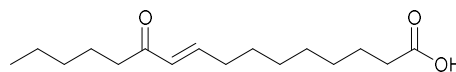

869 11-oxopalmitelaidic acid

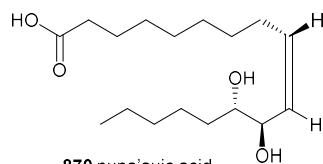

870 puna'auic acid

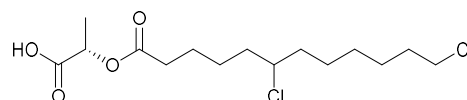

871 chlorosphaerolactylate A

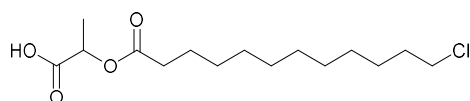

872 chlorosphaerolactylate B

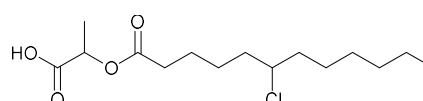

873 chlorosphaerolactylate C

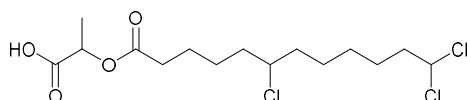

874 chlorosphaerolactylate D

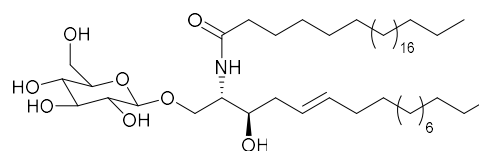

875\* mooreaside A



Table S3. (continued)

| #    | Compound      | Habitat | Producing organism     | DOI                          |
|------|---------------|---------|------------------------|------------------------------|
| 876  | anaephene A   | M       | <i>Hormoscilla</i> sp. | 10.1021/acs.jnatprod.8b00650 |
| 877* | anaephene B   | M       | <i>Hormoscilla</i> sp. | 10.1021/acs.jnatprod.8b00650 |
| 878  | anaephene C   | M       | <i>Hormoscilla</i> sp. | 10.1021/acs.jnatprod.8b00650 |
| 879  | anaenamide A  | M       | <i>Hormoscilla</i> sp. | 10.1021/acs.orglett.0c01281  |
| 880  | anaenamide B  | M       | <i>Hormoscilla</i> sp. | 10.1021/acs.orglett.0c01281  |
| 881  | anaenoic acid | M       | <i>Hormoscilla</i> sp. | 10.1021/acs.orglett.0c01281  |
| 882  | anaenamide C  | M       | <i>Hormoscilla</i> sp. | 10.1021/acs.jnatprod.1c01073 |
| 883  | anaenamide D  | M       | <i>Hormoscilla</i> sp. | 10.1021/acs.jnatprod.1c01073 |

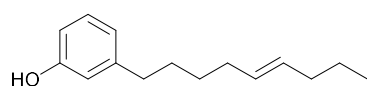

876 anaephene A

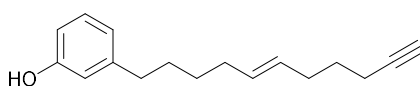

877\* anaephene B

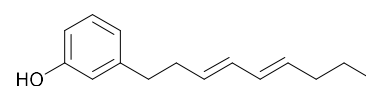

878 anaephene C

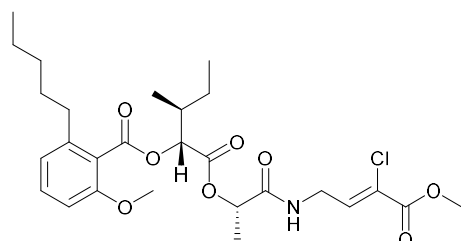

879 anaenamide A

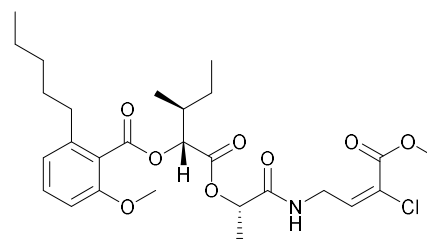

880 anaenamide B

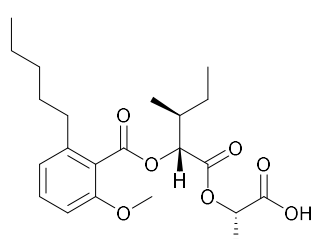

881 anaenoic acid

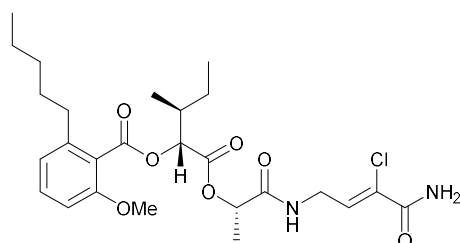

882 anaenamide C

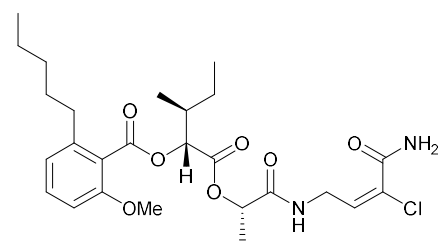

883 anaenamide D

Table S3. (continued)

| #   | Compound      | Habitat | Producing organism          | DOI                          |
|-----|---------------|---------|-----------------------------|------------------------------|
| 884 | bartolosite A | M       | <i>Nodosilinea</i> sp.      | 10.1002/anie.201503186       |
| 885 | bartolosite B | M       | <i>Synechocystis salina</i> | 10.1002/anie.201503186       |
| 886 | bartolosite C | M       | <i>Synechocystis salina</i> | 10.1002/anie.201503186       |
| 887 | bartolosite D | M       | <i>Synechocystis salina</i> | 10.1002/anie.201503186       |
| 888 | bartolosite E | M       | <i>Synechocystis salina</i> | 10.1021/acs.jnatprod.6b00351 |
| 889 | bartolosite F | M       | <i>Synechocystis salina</i> | 10.1021/acs.jnatprod.6b00351 |
| 890 | bartolosite G | M       | <i>Synechocystis salina</i> | 10.1021/acs.jnatprod.6b00351 |
| 891 | bartolosite H | M       | <i>Synechocystis salina</i> | 10.1021/acs.jnatprod.6b00351 |
| 892 | bartolosite I | M       | <i>Synechocystis salina</i> | 10.1021/acs.jnatprod.6b00351 |
| 893 | bartolosite J | M       | <i>Synechocystis salina</i> | 10.1021/acs.jnatprod.6b00351 |
| 894 | bartolosite K | M       | <i>Synechocystis salina</i> | 10.1021/acs.jnatprod.6b00351 |

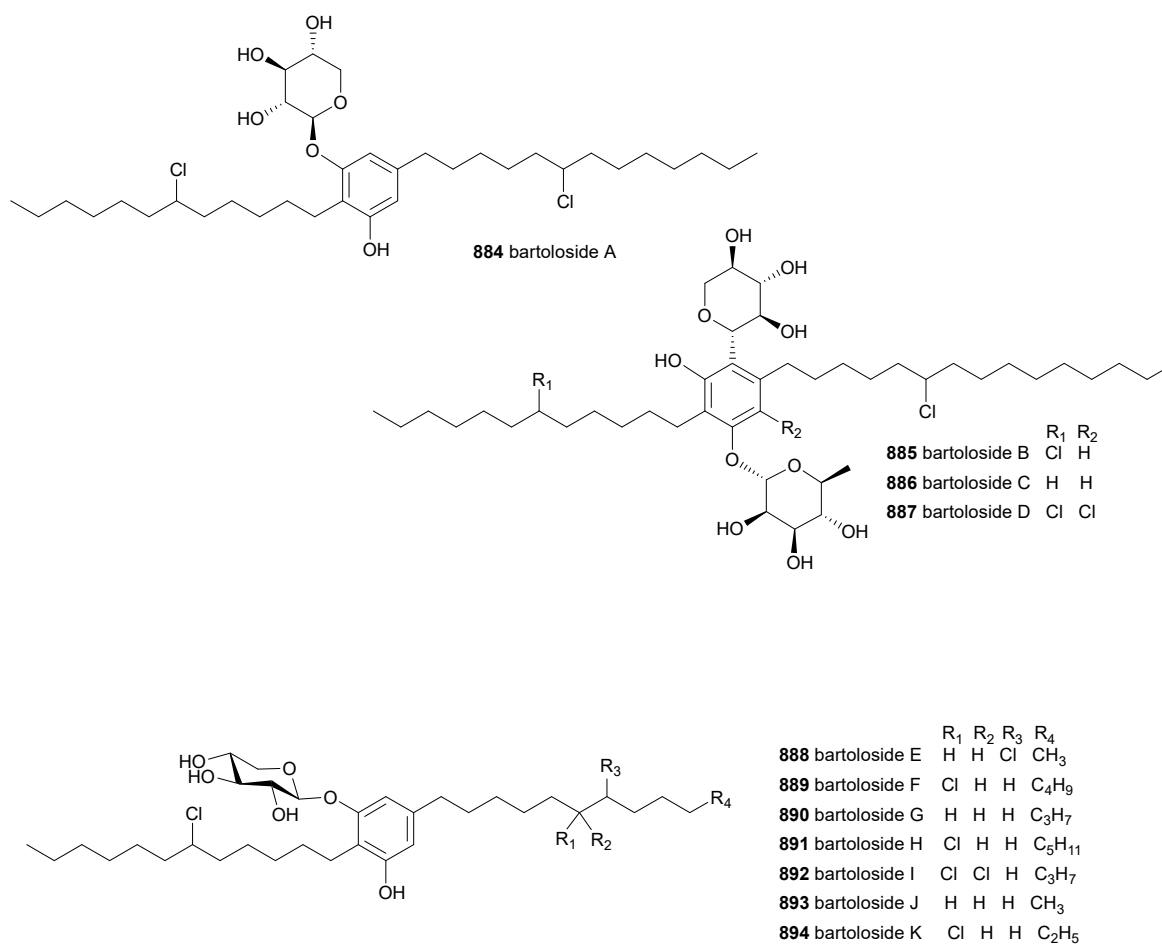

Table S3. (continued)

| #    | Compound                      | Habitat | Producing organism          | DOI                          |
|------|-------------------------------|---------|-----------------------------|------------------------------|
| 895  | bartoloside A-17-yl palmitate | M       | <i>Synechocystis salina</i> | 10.1038/s41467-020-15302-z   |
| 896  | bartoloside A-29-yl palmitate | M       | <i>Synechocystis salina</i> | 10.1038/s41467-020-15302-z   |
| 897* | hierridin C                   | M       | <i>Cyanobium</i> sp.        | 10.1021/acs.jnatprod.8b01038 |

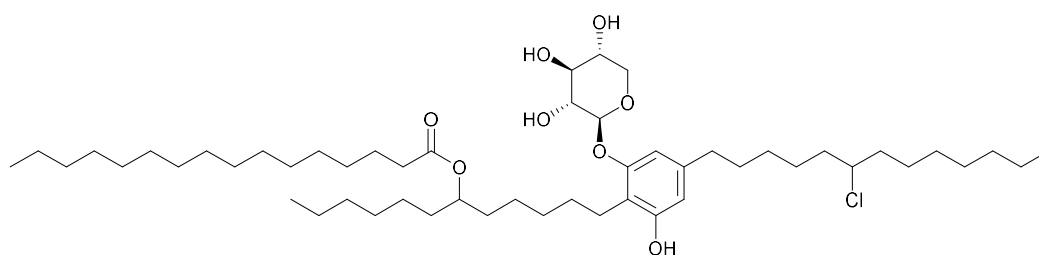

895 bartoloside A-17-yl palmitate

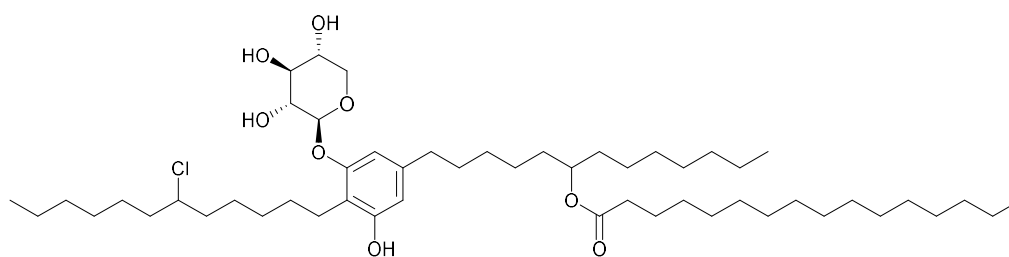

896 bartoloside A-29-yl palmitate

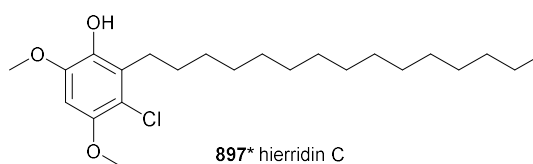

897\* hierridin C

Table S4. Alkaloids from cyanobacteria (2010-2023)

| #    | Compound                                          | Habitat | Producing organism           | DOI                       |
|------|---------------------------------------------------|---------|------------------------------|---------------------------|
| 898  | hapalindole X                                     | F       | <i>Westiellopsis</i> sp.     | 10.1016/j.bmc.2012.06.030 |
| 899  | deschloro hapalindole I                           | F       | <i>Westiellopsis</i> sp.     | 10.1016/j.bmc.2012.06.030 |
| 900* | 13-hydroxy dechlorofontonamide                    | F       | <i>Fischerella muscicola</i> | 10.1016/j.bmc.2012.06.030 |
| 901  | hapalindole A-formamide                           | F       | <i>Hapalosiphon</i> sp.      | 10.1055/a-1045-5178       |
| 902  | hapalindole J-formamide                           | F       | <i>Hapalosiphon</i> sp.      | 10.1055/a-1045-5178       |
| 903  | 12- <i>epi</i> -fischerindole I nitrile           | F       | <i>Fischerella</i> sp.       | 10.1016/j.tet.2012.02.048 |
| 904  | deschloro 12- <i>epi</i> -fischerindole I nitrile | F       | <i>Fischerella</i> sp.       | 10.1016/j.tet.2012.02.048 |
| 905  | 12- <i>epi</i> -fischerindole W nitrile           | F       | <i>Fischerella</i> sp.       | 10.1016/j.tet.2012.02.048 |
| 906  | deschloro 12- <i>epi</i> -fischerindole W nitrile | F       | <i>Fischerella</i> sp.       | 10.1016/j.tet.2012.02.048 |

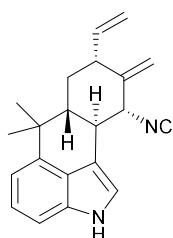

898 hapalindole X

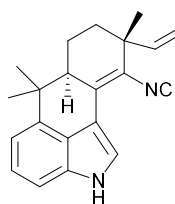

899 deschloro hapalindole I

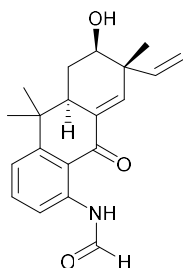

900\* 13-hydroxy dechloro fontonamide

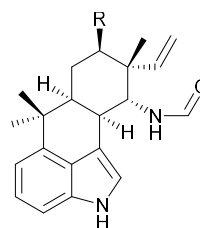

901 hapalindole A-formamide R = Cl

902 hapalindole J-formamide R = H

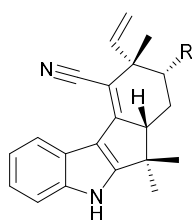903 12-*epi*-fischerindole I nitrile R = Cl904 deschloro 12-*epi*-fischerindole I nitrile R = H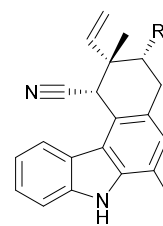905 12-*epi*-fischerindole W nitrile R = Cl906 deschloro 12-*epi*-fischerindole W nitrile R = H

Table S4. (continued)

| #   | Compound            | Habitat | Producing organism         | DOI                             |
|-----|---------------------|---------|----------------------------|---------------------------------|
| 907 | fischambiguine A    | F       | <i>Fischerella ambigua</i> | 10.1016/j.phytochem.2010.09.004 |
| 908 | fischambiguine B    | F       | <i>Fischerella ambigua</i> | 10.1016/j.phytochem.2010.09.004 |
| 909 | ambiguine P         | F       | <i>Fischerella ambigua</i> | 10.1016/j.phytochem.2010.09.004 |
| 910 | ambiguine Q nitrile | F       | <i>Fischerella ambigua</i> | 10.1016/j.phytochem.2010.09.004 |
| 911 | indole derivative 1 | M       | <i>Moorea producens</i>    | 10.1016/j.phytol.2017.09.025    |
| 912 | indole derivative 2 | M       | <i>Moorea producens</i>    | 10.1016/j.phytol.2017.09.025    |
| 913 | indole derivative 3 | M       | <i>Moorea producens</i>    | 10.1016/j.phytol.2017.09.025    |
| 914 | indole derivative 4 | M       | <i>Moorea producens</i>    | 10.1016/j.phytol.2017.09.025    |
| 915 | indole derivative 5 | M       | <i>Moorea producens</i>    | 10.1016/j.phytol.2017.09.025    |

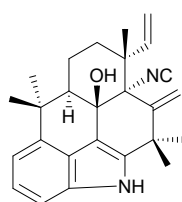

907 fischambiguine A

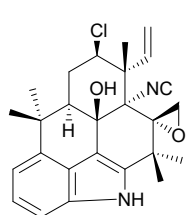

908 fischambiguine B

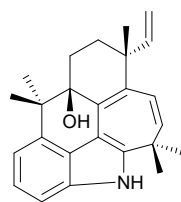

909 ambiguine P

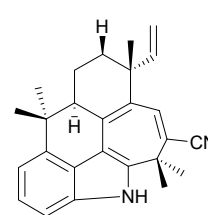

910 ambiguine Q nitrile

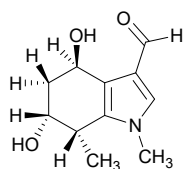

911 indole derivative 1

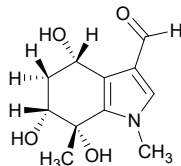

912 indole derivative 2

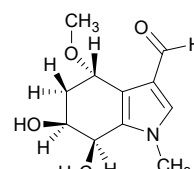

913 indole derivative 3

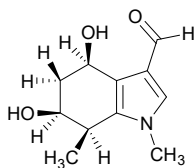

914 indole derivative 4

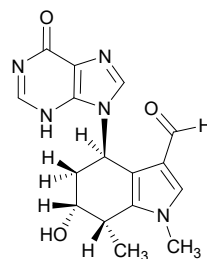

915 indole derivative 5

Table S4. (continued)

| #    | Compound                                         | Habitat | Producing organism                    | DOI                          |
|------|--------------------------------------------------|---------|---------------------------------------|------------------------------|
| 916  | tjipanazole K                                    | F       | <i>Fischerella ambigua</i>            | 10.1002/cbic.202000025       |
| 917  | tjipanazole L                                    | F       | <i>Fischerella ambigua</i>            | 10.1002/cbic.202000025       |
| 918  | tjipanazole M                                    | F       | <i>Fischerella ambigua</i>            | 10.1002/cbic.202000025       |
| 919* | aetokthonotoxin                                  | F       | <i>Aetokthonos hydrillicola</i>       | 10.1126/science.aax9050      |
| 920  | 12- <i>epi</i> -lyngbyatoxin A                   | M       | <i>Moorea producens</i>               | 10.3390/md12052748           |
| 921  | 2-oxo-3(R)-hydroxy-lyngbyatoxin A                | M       | <i>Moorea producens</i>               | 10.3390/md12125788           |
| 922  | 2-oxo-3(R)-hydroxy-13-N-desmethyl-lyngbyatoxin A | M       | <i>Moorea producens</i>               | 10.3390/md12125788           |
| 923  | 2,3-seco-2,3-dioxo-lyngbyatoxin A                | M       | <i>Moorea producens</i>               | 10.1080/14786419.2014.982647 |
| 924  | 7-deoxy-desulfo-cylindrospermopsin               | F       | <i>Cylindrospermopsis raciborskii</i> | 10.1016/j.hal.2014.06.006    |
| 925  | 7-deoxy-desulfo-12-acetylcylindrospermopsin      | F       | <i>Cylindrospermopsis raciborskii</i> | 10.1016/j.hal.2014.06.006    |
| 926* | 7-deoxy-desulfo-argino-cylindrospermopsin        | F       | <i>Raphidiopsis raciborskii</i>       | 10.1021/jacs.2c03932         |

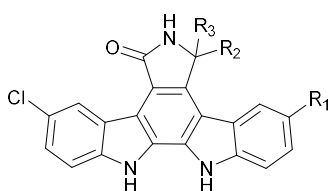916 tjipanazole K  $R_1 = \text{Cl}$   $R_2 = R_3 = \text{H}$ 917 tjipanazole L  $R_1 = \text{Cl}$   $R_2 = R_3 = \text{O}$ 918 tjipanazole M  $R_1 = \text{H}$   $R_2 = R_3 = \text{O}$ 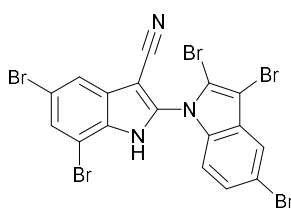

919\* aetokthonotoxin

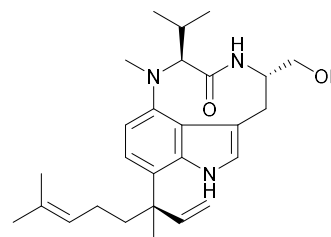920 12-*epi*-lyngbyatoxin A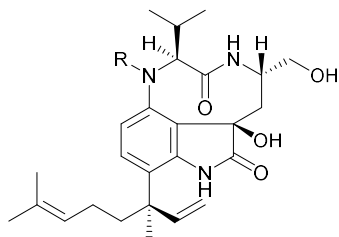921 2-oxo-3(R)-hydroxy-lyngbyatoxin A  $R = \text{CH}_3$ 922 2-oxo-3(R)-hydroxy-13-N-desmethyl-lyngbyatoxin A  $R = \text{H}$ 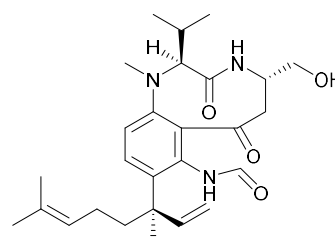

923 2,3-seco-2,3-dioxo-lyngbyatoxin A

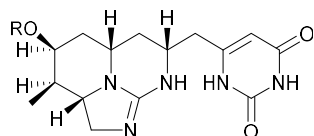924 7-deoxy-desulfo-cylindrospermopsin  $R = \text{H}$ 925 7-deoxy-desulfo-12-acetylcylindrospermopsin  $R = \text{COCH}_3$ 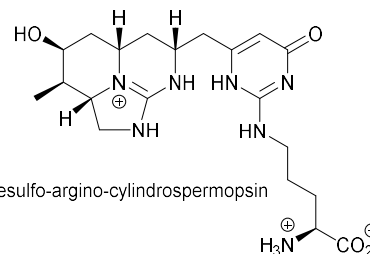

926\* 7-deoxy-desulfo-argino-cylindrospermopsin

Table S4. (continued)

| #    | Compound                       | Habitat | Producing organism                       | DOI                          |
|------|--------------------------------|---------|------------------------------------------|------------------------------|
| 927* | 12 $\beta$ -deoxygonyautoxin 3 | F       | <i>Anabaena circinalis</i>               | 10.3390/toxins11090539       |
| 928* | 12 $\beta$ -deoxygonyautoxin 5 | F       | <i>Dolichospermum circinale</i>          | 10.3390/md20030166           |
| 929* | 12 $\beta$ -deoxysaxitoxin     | F       | <i>Dolichospermum circinale</i>          | 10.3390/md20030166           |
| 930* | carboxy-homoanatoxin-a         | F       | <i>Oscillatoria</i> sp.                  | 10.1021/acs.jnatprod.9b01121 |
| 931* | carboxy-dihydroanatoxin-a      | F       | <i>Cylindrospermum stagnale</i>          | 10.1021/acs.jnatprod.9b01121 |
| 932* | pre-guanitoxin                 | F       | <i>Sphaerospermopsis torques-reginae</i> | 10.1021/jacs.2c01424         |
| 933* | 3-acetyl-21-deoxyuridine       | F       | <i>Moorea producens</i>                  | 10.3390/molecules21030324    |
| 934* | 3-phenylethyl-21-deoxyuridine  | F       | <i>Moorea producens</i>                  | 10.3390/molecules21030324    |

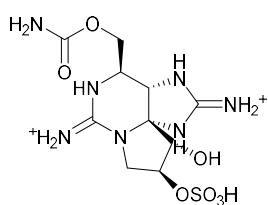927\* 12 $\beta$ -deoxygonyautoxin 3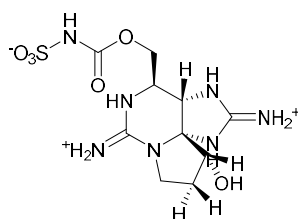928\* 12 $\beta$ -deoxygonyautoxin 5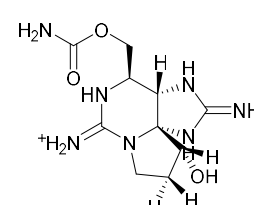929\* 12 $\beta$ -deoxysaxitoxin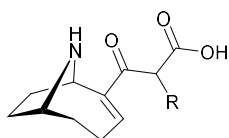930\* carboxy-homoanatoxin-a R = CH<sub>3</sub>

931\* carboxy-dihydroanatoxin-a R = H

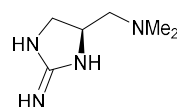

932\* pre-guanitoxin

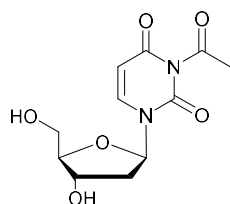

933\* 3-acetyl-21-deoxyuridine

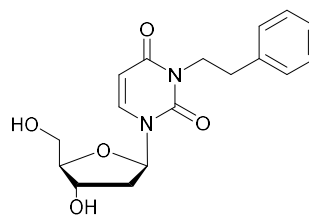

934\* 3-phenylethyl-21-deoxyuridine

Table S4. (continued)

| #    | Compound             | Habitat | Producing organism      | DOI                             |
|------|----------------------|---------|-------------------------|---------------------------------|
| 935  | microcystbiopterin A | F       | <i>Microcystis</i> spp. | 10.1016/j.phytochem.2016.01.010 |
| 936  | microcystbiopterin B | F       | <i>Microcystis</i> spp. | 10.1016/j.phytochem.2016.01.010 |
| 937  | microcystbiopterin C | F       | <i>Microcystis</i> spp. | 10.1016/j.phytochem.2016.01.010 |
| 938  | microcystbiopterin D | F       | <i>Microcystis</i> spp. | 10.1016/j.phytochem.2016.01.010 |
| 939  | microcystbiopterin E | F       | <i>Microcystis</i> spp. | 10.1016/j.phytochem.2016.01.010 |
| 940* | carriebowlinol       | M       | assemblage              | 10.1021/np500598x               |
| 941* | aulosirazole B       | F       | <i>Nostoc</i> sp.       | 10.1021/acs.jnatprod.1c01030    |
| 942* | aulosirazole C       | F       | <i>Nostoc</i> sp.       | 10.1021/acs.jnatprod.1c01030    |

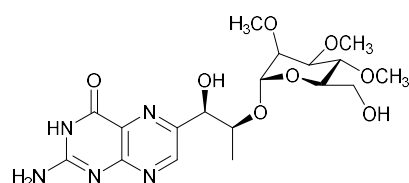

935 microcystbiopterin A

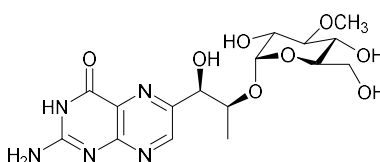

936 microcystbiopterin B

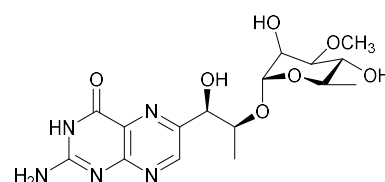

937 microcystbiopterin C

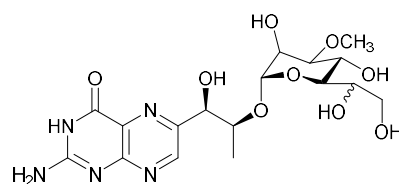

938 microcystbiopterin D

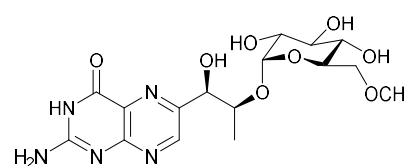

939 microcystbiopterin E

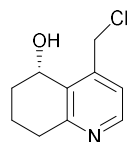

940\* carriebowlinol

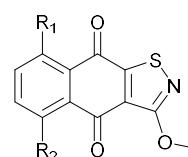

|                     |                |                |
|---------------------|----------------|----------------|
|                     | R <sub>1</sub> | R <sub>2</sub> |
| 941* aulosirazole B | H              | H              |
| 942* aulosirazole C | COOH           | OH             |



Table S5. Miscellaneous compounds from cyanobacteria (2010-2023)

| #    | Compound              | Habitat | Producing organism  | DOI                          |
|------|-----------------------|---------|---------------------|------------------------------|
| 943* | eucapsitrione         | F       | <i>Eucapsis</i> sp. | 10.1021/np100299v            |
| 944  | nostotrebin 6         | F       | <i>Nostoc</i> sp.   | 10.3109/14756360903213481    |
| 945  | nostotrebinal 3       | F       | <i>Nostoc</i> sp.   | 10.1021/acs.jnatprod.9b00885 |
| 946  | nostolactone 4        | F       | <i>Nostoc</i> sp.   | 10.1021/acs.jnatprod.9b00885 |
| 947  | nostotrebin 7         | F       | <i>Nostoc</i> sp.   | 10.1021/acs.jnatprod.9b00885 |
| 948  | nostotrebinalactone 7 | F       | <i>Nostoc</i> sp.   | 10.1021/acs.jnatprod.9b00885 |

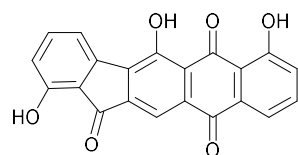

943\* eucapsitrione

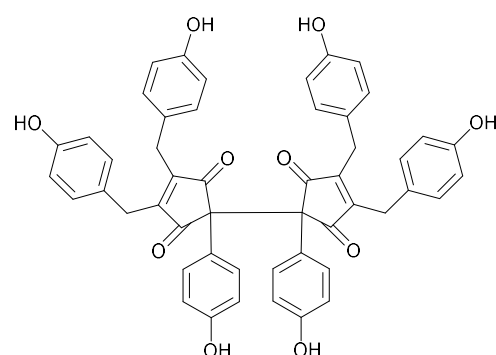

944 nostotrebin 6

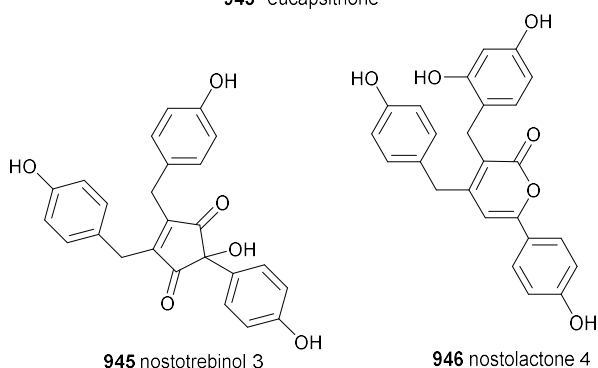

945 nostotrebinal 3

946 nostolactone 4

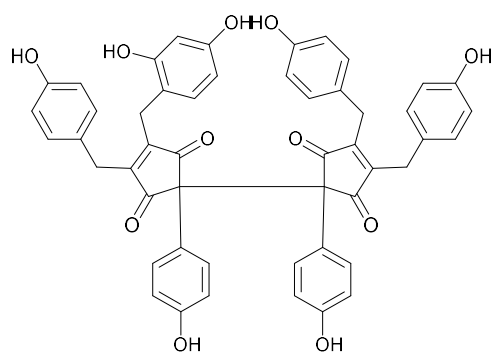

947 nostotrebin 7

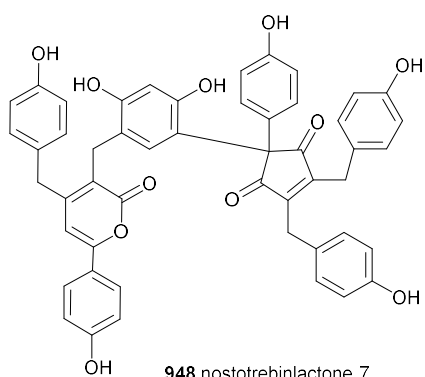

948 nostotrebinalactone 7

Table S5. (continued)

| #    | Compound             | Habitat | Producing organism             | DOI                        |
|------|----------------------|---------|--------------------------------|----------------------------|
| 949  | crossbyanol A        | M       | <i>Leptolyngbya crossbyana</i> | 10.1021/np900661g          |
| 950  | crossbyanol B        | M       | <i>Leptolyngbya crossbyana</i> | 10.1021/np900661g          |
| 951  | crossbyanol C        | M       | <i>Leptolyngbya crossbyana</i> | 10.1021/np900661g          |
| 952  | crossbyanol D        | M       | <i>Leptolyngbya crossbyana</i> | 10.1021/np900661g          |
| 953  | bromoiesol A sulfate | M       | <i>Salileptolyngbya</i> sp.    | 10.1021/acs.joc.1c01214    |
| 954  | bromoiesol B sulfate | M       | <i>Salileptolyngbya</i> sp.    | 10.1021/acs.joc.1c01214    |
| 955  | ambigol D            | F       | <i>Fischerella ambigua</i>     | 10.1021/acschembio.0c00554 |
| 956  | ambigol E            | F       | <i>Fischerella ambigua</i>     | 10.1021/acschembio.0c00554 |
| 957* | EMTAHDCA             | F       | <i>Nostoc</i> sp.              | 10.3389/fmicb.2016.01899   |

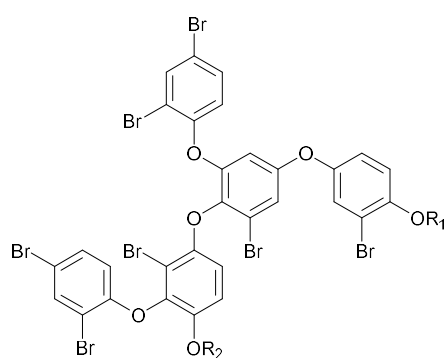

|                   | R <sub>1</sub>    | R <sub>2</sub>    |
|-------------------|-------------------|-------------------|
| 949 crossbyanol A | H                 | H                 |
| 950 crossbyanol B | SO <sub>3</sub> H | SO <sub>3</sub> H |
| 951 crossbyanol C | H                 | SO <sub>3</sub> H |
| 952 crossbyanol D | SO <sub>3</sub> H | H                 |

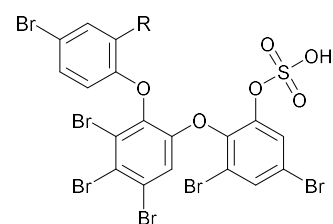

953 bromoiesol A sulfate R = Br  
954 bromoiesol B sulfate R = I

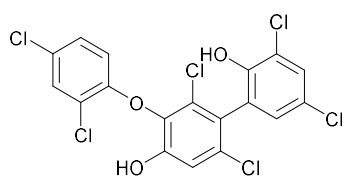

955 ambigol D

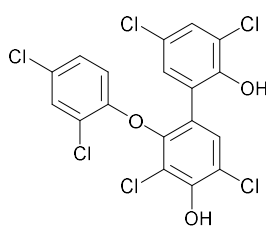

956 ambigol E

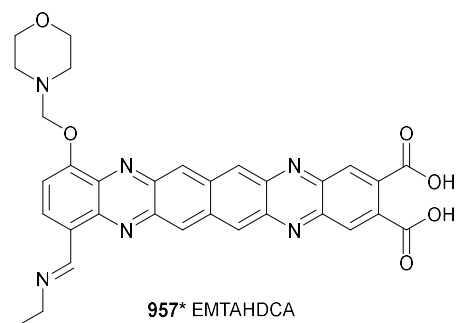

957\* EMTAHDCA

Table S5. (continued)

| #    | Compound                                | Habitat | Producing organism     | DOI                     |
|------|-----------------------------------------|---------|------------------------|-------------------------|
| 958  | tolyporphin L                           | F       | <i>Brasilonema</i> sp. | 10.1021/acs.joc.9b01928 |
| 959  | tolyporphin M                           | F       | <i>Brasilonema</i> sp. | 10.1021/acs.joc.9b01928 |
| 960  | tolyporphin N                           | F       | <i>Brasilonema</i> sp. | 10.1021/acs.joc.9b01928 |
| 961  | tolyporphin O                           | F       | <i>Brasilonema</i> sp. | 10.1021/acs.joc.9b01928 |
| 962  | tolyporphin P                           | F       | <i>Brasilonema</i> sp. | 10.1021/acs.joc.9b01928 |
| 963  | tolyporphin Q                           | F       | <i>Brasilonema</i> sp. | 10.1021/acs.joc.9b01928 |
| 964  | tolyporphin R                           | F       | <i>Brasilonema</i> sp. | 10.1021/acs.joc.9b01928 |
| 965* | 13 <sup>2</sup> -hydroxy-pheofarnesin a | M       | <i>Nodosilinea</i> sp. | 10.3390/md17040229      |

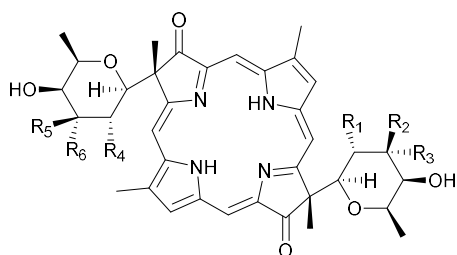

|                   | R <sub>1</sub> | R <sub>2</sub> | R <sub>3</sub> | R <sub>4</sub> | R <sub>5</sub> | R <sub>6</sub> |
|-------------------|----------------|----------------|----------------|----------------|----------------|----------------|
| 958 tolyporphin L | OH             | H              | OH             | OAc            | H              | H              |
| 959 tolyporphin M | OAc            | H              | H              | OH             | H              | OH             |
| 960 tolyporphin N | OH             | OH             | H              | OAc            | H              | H              |
| 961 tolyporphin O | OAc            | H              | H              | OH             | OH             | H              |

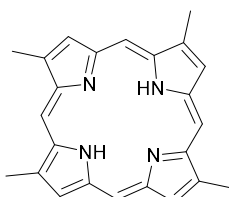

962 tolyporphin P

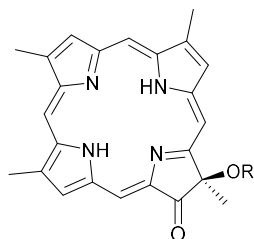963 tolyporphin Q R = H  
964 tolyporphin R R = Ac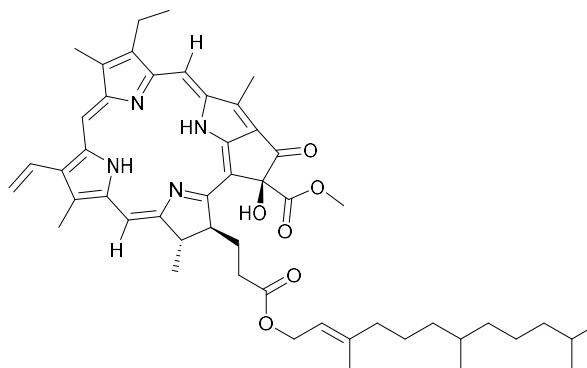965\* 13<sup>2</sup>-hydroxy-pheofarnesin a

Table S5. (continued)

| #    | Compound                                 | Habitat | Producing organism       | DOI                              |
|------|------------------------------------------|---------|--------------------------|----------------------------------|
| 966* | 478-Da MAA                               | F       | <i>Nostoc commune</i>    | 10.1016/j.jphotobiol.2011.07.003 |
| 967  | 1050-Da MAA                              | F       | <i>Nostoc commune</i>    | 10.1016/j.jphotobiol.2011.07.003 |
| 968  | 13-O-( $\beta$ -galactosyl)-porphyra-334 | F       | <i>Nostoc sphaericum</i> | 10.1016/j.jphotobiol.2017.05.019 |
| 969* | 756-Da MAA or nostoc-756                 | F       | <i>Nostoc commune</i>    | 10.1111/pre.12333                |
| 970  | aplysiapalythine E                       | F       | <i>Nostoc</i> sp.        | 10.1021/acschembio.3c00112       |

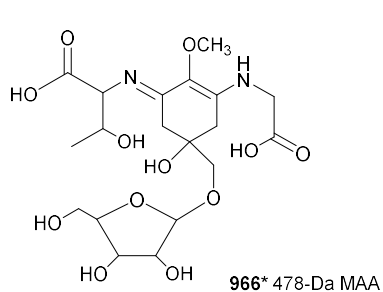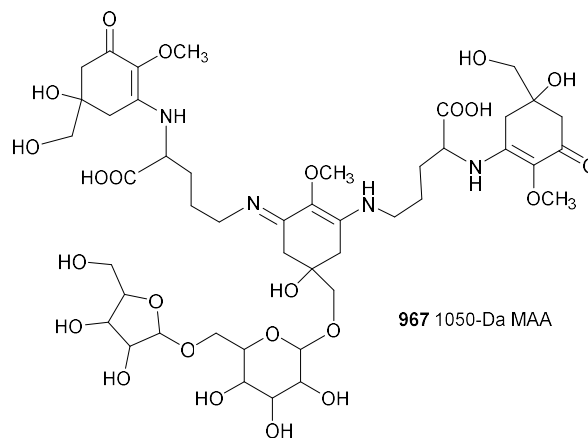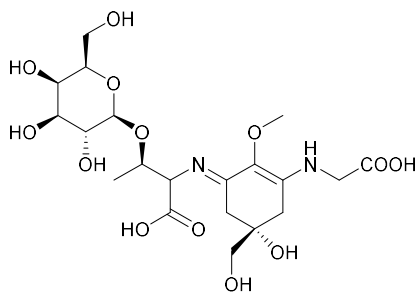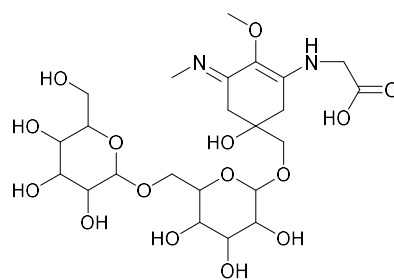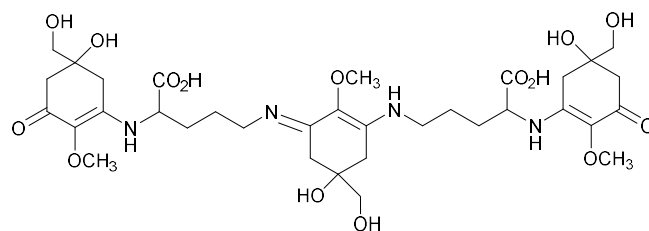

Table S5. (continued)

| #    | Compound      | Habitat | Producing organism                                                  | DOI                          |
|------|---------------|---------|---------------------------------------------------------------------|------------------------------|
| 971  | dragocin A    | M       | <i>Symploca</i> -like morphology                                    | 10.1021/acs.orglett.8b03712  |
| 972  | dragocin B    | M       | <i>Symploca</i> -like morphology                                    | 10.1021/acs.orglett.8b03712  |
| 973  | dragocin C    | M       | <i>Symploca</i> -like morphology                                    | 10.1021/acs.orglett.8b03712  |
| 974* | dragocin D    | M       | <i>Symploca</i> -like morphology                                    | 10.1021/acs.orglett.8b03712  |
| 975  | leptazoline A | F       | <i>Leptolyngbya</i> sp.                                             | 10.1021/acs.orglett.9b03216  |
| 976  | leptazoline B | F       | <i>Leptolyngbya</i> sp.                                             | 10.1021/acs.orglett.9b03216  |
| 977  | leptazoline C | F       | <i>Leptolyngbya</i> sp.                                             | 10.1021/acs.orglett.9b03216  |
| 978  | leptazoline D | F       | <i>Leptolyngbya</i> sp.                                             | 10.1021/acs.orglett.9b03216  |
| 979* | thiopalmirone | M       | cf. <i>Oscillatoria</i> and <i>Hormoscilla</i> spp.<br>(assemblage) | 10.1021/np200106b            |
| 980  | hennaminal    | M       | <i>Rivularia</i> sp.                                                | 10.1021/acs.orglett.3c00421  |
| 981* | hennamide     | M       | <i>Rivularia</i> sp.                                                | 10.1021/acs.orglett.3c00421  |
| 982* | caldorin      | M       | <i>Caldora penicillata</i>                                          | 10.1016/j.tetlet.2018.02.046 |

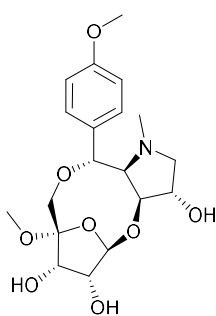

971 dragocin A

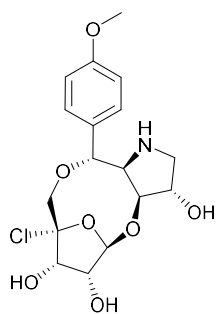

972 dragocin B

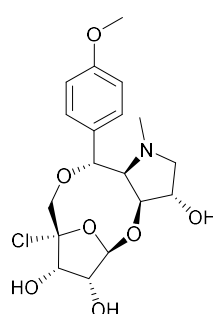

973 dragocin C

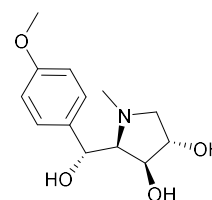

974\* dragocin D

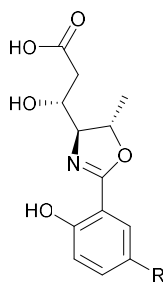975 leptazoline A R = Cl  
977 leptazoline C R = H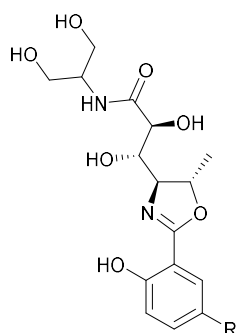976 leptazoline B R = Cl  
978 leptazoline D R = H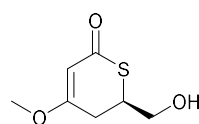

979\* thiopalmirone

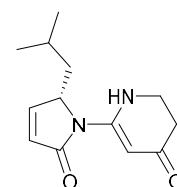

980\* hennaminal

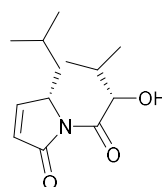

981\* hennamide

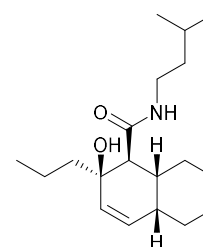

982\* caldorin

Table S5. (continued)

| #    | Compound                                 | Habitat | Producing organism     | DOI                          |
|------|------------------------------------------|---------|------------------------|------------------------------|
| 983* | eudesmacarbonate                         | M       | assemblage             | 10.1021/acs.jnatprod.0c00203 |
| 984  | stigolone                                | F       | <i>Scytonema</i> sp.   | 10.1021/acs.jnatprod.1c01014 |
| 985  | 11R,12-dihydroxystigolone                | F       | <i>Scytonema</i> sp.   | 10.1021/acs.jnatprod.1c01014 |
| 986  | 11S,12-dihydroxystigolone                | F       | <i>Scytonema</i> sp.   | 10.1021/acs.jnatprod.1c01014 |
| 987  | spironostoic acid                        | F       | <i>Calothrix</i> sp.   | 10.1021/acs.jnatprod.1c01014 |
| 988  | 11,12-didehydrospironostoic acid         | F       | <i>Calothrix</i> sp.   | 10.1021/acs.jnatprod.1c01014 |
| 989  | 12-hydroxy-2-oxo-11- <i>epi</i> -hinesol | F       | <i>Calothrix</i> sp.   | 10.1021/acs.jnatprod.1c01014 |
| 990* | cybastacine A                            | F       | <i>Nostoc</i> sp.      | 10.1021/acs.jnatprod.7b00638 |
| 991* | cybastacine B                            | F       | <i>Nostoc</i> sp.      | 10.1021/acs.jnatprod.7b00638 |
| 992  | 6-deoxytolypodiol                        | F       | <i>Brasilonema</i> sp. | 10.1021/acs.jnatprod.9b00844 |
| 993  | 11-hydroxytolypodiol                     | F       | <i>Brasilonema</i> sp. | 10.1021/acs.jnatprod.9b00844 |
| 994  | 6-oxo-tolypodiol                         | F       | <i>Brasilonema</i> sp. | 10.1021/acschembio.3c00225   |
| 995  | 1-oxo-tolypodiol                         | F       | <i>Brasilonema</i> sp. | 10.1021/acschembio.3c00225   |

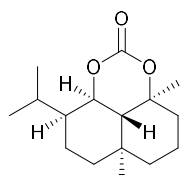

983\* eudesmacarbonate

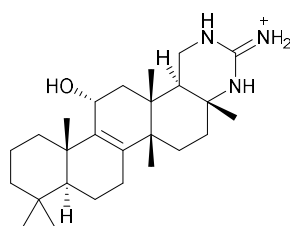

990\* cybastacine A

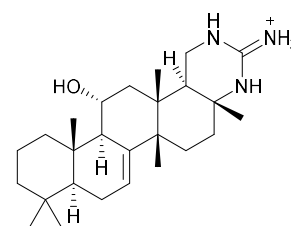

991\* cybastacine B

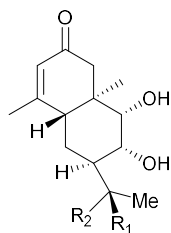984 stigolone  $R_1=R_2=CH_2$ 985 11R,12-dihydroxystigolone  $R_1=OH; R_2=CH_2OH$ 986 11S,12-dihydroxystigolone  $R_1=CH_2OH; R_2=OH$ 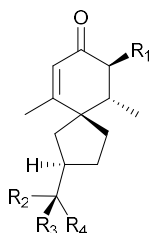987 spironostoic acid  $R_1=H; R_2=CO_2H; R_3=H; R_4=CH_3$ 988 11,12-didehydrospironostoic acid  $R_1=H; R_2=CO_2H; R_3=R_4=CH_2$ 989 12-hydroxy-2-oxo-11-*epi*-hinesol  $R_1=H; R_2=CH_2OH; R_3=CH_3; R_4=OH$ 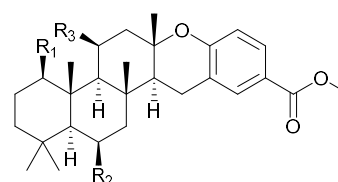992 6-deoxytolypodiol  $R_1=OH; R_2=H; R_3=H$ 993 11-hydroxytolypodiol  $R_1=OH; R_2=OH; R_3=OH$ 994 6-oxo-tolypodiol  $R_1=OH; R_2=O; R_3=H$ 995 1-oxo-tolypodiol  $R_1=O; R_2=OH; R_3=H$
